# Supplementary material for: Organ-Specific Gene Expression Reveals the Role of the Cymbidium ensifolium-miR396/Growth-Regulating Factors Module in Flower Development of the Orchid Plant Cymbidium ensifolium
Source: Front Plant Sci. 2022 Jan 27;12:799778. doi: 10.3389/fpls.2021.799778 (PMC8829051; doi:10.3389/fpls.2021.799778)
Supplement: Supplementary file 7 [file Table_1.XLSX]

## Sheet: Sheet1
Supplementary Table 1. The primers used for quantitative RT-PCR
CeGRF11-RT-F1	TGCCGTCGAACTGATGGAAA
CeGRF11-RT-R1	GAAGCAGCTGATGCCGATTG
CeGRF10-RT-F1	TGTTCGAGGGATGCAGTTGT
CeGRF10-RT-R1	ACAGCTGATGCCGATTGTGA
CeGRF9-RT-F1	CAAGAAATGGCGCTGCTCAA
CeGRF9-RT-R1	GTGACGCCTGGAATGGTTCT
CeGRF8-RT-F1	CTCGCGTGACGTAGTTCCC
CeGRF8-RT-R1	AATGGAACAGCAGGCGTCA
CeGRF7-RT-F1	CCACCTTACATATCGCCGGAA
CeGRF7-RT-R1	GGCTATACAAACGGCCTCTGA
CeGRF6-RT-F1	ATGGAAAGAAATGGCGGTGC
CeGRF6-RT-R1	GGTGGGAGCAAGAGAAGTCG
CeGRF5-RT-F1	ATGGAAAGAAATGGCGGTGC
CeGRF5-RT-R1	CGAAGTCGCCATCGAAGACA
CeGRF4-RT-F1	ACCGATGGAAAGAAGTGGCG
CeGRF4-RT-R1	GAGGACAAATGTGACTGCGAC
CeGRF3-RT-F1	ATGCTCAAAGGAGGCTTACCC
CeGRF3-RT-R1	AGTAGAAGAAGAGGATTGGTTCGT
CeGRF2-RT-F1	AGAACCAGGAAGGTGTAGGAGA
CeGRF2-RT-R1	TTTGTTTTAGCAGCAAGAGAGATT
CeGRF1-RT-F1	GAAGTGGAGGTGCTCCAAGA
CeGRF1-RT-R1	ATTGAGAGGTTTGCACGGTGA
miR396-RT:GTCGTATCCAGTGCAGGGTCCGAGGTATTCGCACTGGATACGACaagttc
miR396-F: GCCGCGTTCCACAGCTTTCTT
Universal: GTGCAGGGTCCGAGGT
