# Supplementary material for: Organ-Specific Gene Expression Reveals the Role of the Cymbidium ensifolium-miR396/Growth-Regulating Factors Module in Flower Development of the Orchid Plant Cymbidium ensifolium
Source: Front Plant Sci. 2022 Jan 27;12:799778. doi: 10.3389/fpls.2021.799778 (PMC8829051; doi:10.3389/fpls.2021.799778)
Supplement: Supplementary file 10 [file Table_4.XLSX]

## Sheet: total KEGG
Supplementary Table 4. Details of the pathway annotations for the DEGs by KEGG.
Term	Database	Id	Sample number	Background number	P-Value	Corrected P-Value	Genes	Hyperlink
Pentose and glucuronate interconversions	KEGG PATHWAY	ko00040	2	126	0.02195	0.11952	ZHLZ.comp47058_c0_seq1|ZHLZ.comp49885_c0_seq1|ZHLZ.comp54417_c0_seq1|ZHLZ.comp56605_c1_seq1|	http://www.genome.jp/kegg-bin/show_pathway?ko00040
Fructose and mannose metabolism	KEGG PATHWAY	ko00051	1	163	0.2505	0.273273	ZHLZ.comp35654_c0_seq1|	http://www.genome.jp/kegg-bin/show_pathway?ko00051
Galactose metabolism	KEGG PATHWAY	ko00052	1	124	0.1972	0.2648	ZHLZ.comp53276_c0_seq1|	http://www.genome.jp/kegg-bin/show_pathway?ko00052
Fatty acid elongation	KEGG PATHWAY	ko00062	1	64	0.1073	0.221	ZHLZ.comp55945_c1_seq2|	http://www.genome.jp/kegg-bin/show_pathway?ko00062
Steroid hormone biosynthesis	KEGG PATHWAY	ko00140	1	147	0.2291	0.273273	ZHLZ.comp55945_c1_seq2|	http://www.genome.jp/kegg-bin/show_pathway?ko00140
Photosynthesis - antenna proteins	KEGG PATHWAY	ko00196	1	43	0.07349	0.22047	ZHLZ.comp57801_c0_seq1|	http://www.genome.jp/kegg-bin/show_pathway?ko00196
Alanine, aspartate and glutamate metabolism	KEGG PATHWAY	ko00250	1	96	0.1565	0.244957	ZHLZ.comp35703_c0_seq1|	http://www.genome.jp/kegg-bin/show_pathway?ko00250
Tyrosine metabolism	KEGG PATHWAY	ko00350	2	149	0.02988	0.11952	ZHLZ.comp26963_c0_seq1|ZHLZ.comp52111_c0_seq1|	http://www.genome.jp/kegg-bin/show_pathway?ko00350
Tryptophan metabolism	KEGG PATHWAY	ko00380	1	150	0.2332	0.273273	ZHLZ.comp36142_c1_seq1|	http://www.genome.jp/kegg-bin/show_pathway?ko00380
Cyanoamino acid metabolism	KEGG PATHWAY	ko00460	1	80	0.1323	0.2214	ZHLZ.comp26845_c0_seq1|ZHLZ.comp36142_c0_seq1|ZHLZ.comp58678_c0_seq2|	http://www.genome.jp/kegg-bin/show_pathway?ko00460
Glutathione metabolism	KEGG PATHWAY	ko00480	1	82	0.1353	0.2214	ZHLZ.comp27514_c0_seq1|ZHLZ.comp54113_c0_seq1|	http://www.genome.jp/kegg-bin/show_pathway?ko00480
Starch and sucrose metabolism	KEGG PATHWAY	ko00500	3	147	0.002585	0.023265	ZHLZ.comp26845_c0_seq1|ZHLZ.comp36142_c0_seq1|ZHLZ.comp53276_c0_seq1|ZHLZ.comp55250_c0_seq1|ZHLZ.comp58678_c0_seq2|	http://www.genome.jp/kegg-bin/show_pathway?ko00500
Amino sugar and nucleotide sugar metabolism	KEGG PATHWAY	ko00520	1	260	0.368	0.378514	ZHLZ.comp48606_c0_seq1|ZHLZ.comp48606_c0_seq2|	http://www.genome.jp/kegg-bin/show_pathway?ko00520
Linoleic acid metabolism	KEGG PATHWAY	ko00591	2	54	0.00436	0.031392	ZHLZ.comp47430_c0_seq1|ZHLZ.comp47430_c1_seq1|ZHLZ.comp56023_c0_seq1|	http://www.genome.jp/kegg-bin/show_pathway?ko00591
alpha-Linolenic acid metabolism	KEGG PATHWAY	ko00592	1	66	0.1105	0.221	ZHLZ.comp56023_c0_seq1|	http://www.genome.jp/kegg-bin/show_pathway?ko00592
Phenylpropanoid biosynthesis	KEGG PATHWAY	ko00940	3	101	0.000887	0.010644	ZHLZ.comp26845_c0_seq1|ZHLZ.comp36142_c0_seq1|ZHLZ.comp55755_c1_seq1|ZHLZ.comp55755_c1_seq3|ZHLZ.comp58678_c0_seq2|ZHLZ.comp59523_c0_seq1|	http://www.genome.jp/kegg-bin/show_pathway?ko00940
Flavonoid biosynthesis	KEGG PATHWAY	ko00941	3	91	0.000656	0.010644	ZHLZ.comp27950_c0_seq1|ZHLZ.comp54855_c0_seq1|ZHLZ.comp56809_c5_seq1|	http://www.genome.jp/kegg-bin/show_pathway?ko00941
Isoquinoline alkaloid biosynthesis	KEGG PATHWAY	ko00950	2	139	0.02631	0.11952	ZHLZ.comp26963_c0_seq1|ZHLZ.comp52111_c0_seq1|	http://www.genome.jp/kegg-bin/show_pathway?ko00950
Betalain biosynthesis	KEGG PATHWAY	ko00965	1	32	0.05524	0.180785	ZHLZ.comp52111_c0_seq1|	http://www.genome.jp/kegg-bin/show_pathway?ko00965
Metabolism of xenobiotics by cytochrome P450	KEGG PATHWAY	ko00980	1	155	0.2399	0.273273	ZHLZ.comp27514_c0_seq1|ZHLZ.comp54113_c0_seq1|	http://www.genome.jp/kegg-bin/show_pathway?ko00980
Drug metabolism - cytochrome P450	KEGG PATHWAY	ko00982	1	125	0.1986	0.2648	ZHLZ.comp27514_c0_seq1|ZHLZ.comp54113_c0_seq1|	http://www.genome.jp/kegg-bin/show_pathway?ko00982
Biosynthesis of unsaturated fatty acids	KEGG PATHWAY	ko01040	1	82	0.1353	0.2214	ZHLZ.comp55945_c1_seq2|	http://www.genome.jp/kegg-bin/show_pathway?ko01040
Metabolic pathways	KEGG PATHWAY	ko01100	16	4666	0.0292	0.11952	ZHLZ.comp26845_c0_seq1|ZHLZ.comp26963_c0_seq1|ZHLZ.comp27950_c0_seq1|ZHLZ.comp35703_c0_seq1|ZHLZ.comp36142_c0_seq1|ZHLZ.comp48606_c0_seq1|ZHLZ.comp48606_c0_seq2|ZHLZ.comp49885_c0_seq1|ZHLZ.comp52111_c0_seq1|ZHLZ.comp53276_c0_seq1|ZHLZ.comp54417_c0_seq1|ZHLZ.comp54855_c0_seq1|ZHLZ.comp55250_c0_seq1|ZHLZ.comp55755_c1_seq1|ZHLZ.comp55755_c1_seq3|ZHLZ.comp55945_c1_seq2|ZHLZ.comp56023_c0_seq1|ZHLZ.com…	http://www.genome.jp/kegg-bin/show_pathway?ko01100
Biosynthesis of secondary metabolites	KEGG PATHWAY	ko01110	13	2131	0.0004426	0.010644	ZHLZ.comp26845_c0_seq1|ZHLZ.comp26963_c0_seq1|ZHLZ.comp27950_c0_seq1|ZHLZ.comp35703_c0_seq1|ZHLZ.comp36142_c0_seq1|ZHLZ.comp49295_c0_seq1|ZHLZ.comp52111_c0_seq1|ZHLZ.comp54855_c0_seq1|ZHLZ.comp55755_c1_seq1|ZHLZ.comp55755_c1_seq3|ZHLZ.comp55945_c1_seq2|ZHLZ.comp56023_c0_seq1|ZHLZ.comp56809_c5_seq1|ZHLZ.comp58678_c0_seq2|ZHLZ.comp59273_c1_seq1|ZHLZ.comp59273_c1_seq7|ZHLZ.comp59523_c0_seq1|	http://www.genome.jp/kegg-bin/show_pathway?ko01110
Microbial metabolism in diverse environments	KEGG PATHWAY	ko01120	1	2069	0.2491	0.273273	ZHLZ.comp59273_c1_seq1|ZHLZ.comp59273_c1_seq7|	http://www.genome.jp/kegg-bin/show_pathway?ko01120
Fatty acid metabolism	KEGG PATHWAY	ko01212	1	177	0.2688	0.284612	ZHLZ.comp55945_c1_seq2|	http://www.genome.jp/kegg-bin/show_pathway?ko01212
Platinum drug resistance	KEGG PATHWAY	ko01524	1	49	0.0833	0.221	ZHLZ.comp27514_c0_seq1|ZHLZ.comp54113_c0_seq1|	http://www.genome.jp/kegg-bin/show_pathway?ko01524
Quorum sensing	KEGG PATHWAY	ko02024	1	338	0.4485	0.4485	ZHLZ.comp47058_c0_seq1|	http://www.genome.jp/kegg-bin/show_pathway?ko02024
MAPK signaling pathway - plant	KEGG PATHWAY	ko04016	1	55	0.09299	0.221	ZHLZ.comp48606_c0_seq1|ZHLZ.comp48606_c0_seq2|	http://www.genome.jp/kegg-bin/show_pathway?ko04016
Ferroptosis	KEGG PATHWAY	ko04216	1	65	0.1089	0.221	ZHLZ.comp46581_c0_seq1|	http://www.genome.jp/kegg-bin/show_pathway?ko04216
Necroptosis	KEGG PATHWAY	ko04217	1	107	0.1727	0.248688	ZHLZ.comp46581_c0_seq1|	http://www.genome.jp/kegg-bin/show_pathway?ko04217
Circadian rhythm - plant	KEGG PATHWAY	ko04712	1	28	0.04851	0.174636	ZHLZ.comp27950_c0_seq1|	http://www.genome.jp/kegg-bin/show_pathway?ko04712
Melanogenesis	KEGG PATHWAY	ko04916	1	74	0.123	0.2214	ZHLZ.comp52111_c0_seq1|	http://www.genome.jp/kegg-bin/show_pathway?ko04916
Mineral absorption	KEGG PATHWAY	ko04978	1	61	0.1026	0.221	ZHLZ.comp46581_c0_seq1|	http://www.genome.jp/kegg-bin/show_pathway?ko04978
Chemical carcinogenesis	KEGG PATHWAY	ko05204	1	136	0.214	0.273273	ZHLZ.comp27514_c0_seq1|ZHLZ.comp54113_c0_seq1|	http://www.genome.jp/kegg-bin/show_pathway?ko05204
Fluid shear stress and atherosclerosis	KEGG PATHWAY	ko05418	1	107	0.1727	0.248688	ZHLZ.comp27514_c0_seq1|ZHLZ.comp54113_c0_seq1|	http://www.genome.jp/kegg-bin/show_pathway?ko05418
Glycolysis / Gluconeogenesis	KEGG PATHWAY	ko00010	14	131	6.123e-07	1.69572e-05	ZHLZ.comp26757_c0_seq1|ZHLZ.comp26910_c0_seq1|ZHLZ.comp27189_c0_seq1|ZHLZ.comp35381_c0_seq1|ZHLZ.comp35702_c0_seq1|ZHLZ.comp36082_c1_seq1|ZHLZ.comp36082_c2_seq1|ZHLZ.comp45488_c0_seq1|ZHLZ.comp45546_c0_seq1|ZHLZ.comp46348_c1_seq1|ZHLZ.comp46813_c0_seq1|ZHLZ.comp48853_c0_seq1|ZHLZ.comp49635_c0_seq1|ZHLZ.comp49797_c0_seq1|ZHLZ.comp52668_c0_seq1|ZHLZ.comp54484_c2_seq1|ZHLZ.comp57293_c1_seq1|ZHLZ.com…	http://www.genome.jp/kegg-bin/show_pathway?ko00010
Citrate cycle	KEGG PATHWAY	ko00020	9	78	3.172e-05	0.00068991	ZHLZ.comp27189_c0_seq1|ZHLZ.comp27213_c0_seq1|ZHLZ.comp46161_c0_seq1|ZHLZ.comp46348_c1_seq1|ZHLZ.comp48853_c0_seq1|ZHLZ.comp54426_c0_seq1|ZHLZ.comp54484_c2_seq1|ZHLZ.comp56613_c0_seq1|ZHLZ.comp57293_c1_seq1|ZHLZ.comp57459_c1_seq1|ZHLZ.comp59542_c0_seq1|ZHLZ.comp60222_c0_seq1|	http://www.genome.jp/kegg-bin/show_pathway?ko00020
Pentose phosphate pathway	KEGG PATHWAY	ko00030	7	115	0.009422	0.0878265	ZHLZ.comp26757_c0_seq1|ZHLZ.comp26910_c0_seq1|ZHLZ.comp35381_c0_seq1|ZHLZ.comp35974_c0_seq1|ZHLZ.comp46945_c0_seq1|ZHLZ.comp53861_c0_seq1|ZHLZ.comp53861_c1_seq1|ZHLZ.comp56799_c0_seq1|ZHLZ.comp56799_c1_seq3|ZHLZ.comp58735_c1_seq3|ZHLZ.comp59942_c0_seq1|ZHLZ.comp60133_c0_seq1|	http://www.genome.jp/kegg-bin/show_pathway?ko00030
Ascorbate and aldarate metabolism	KEGG PATHWAY	ko00040	4	126	0.3279	0.922761	ZHLZ.comp45315_c0_seq1|ZHLZ.comp47058_c0_seq1|ZHLZ.comp49885_c0_seq1|ZHLZ.comp51600_c0_seq1|ZHLZ.comp52113_c0_seq3|ZHLZ.comp54417_c0_seq1|ZHLZ.comp56129_c0_seq1|ZHLZ.comp57143_c0_seq1|ZHLZ.comp58993_c2_seq1|	http://www.genome.jp/kegg-bin/show_pathway?ko00040
Fatty acid biosynthesis	KEGG PATHWAY	ko00051	5	163	0.3905	0.951094	ZHLZ.comp26757_c0_seq1|ZHLZ.comp26910_c0_seq1|ZHLZ.comp35381_c0_seq1|ZHLZ.comp35654_c0_seq1|ZHLZ.comp45546_c0_seq1|ZHLZ.comp51600_c0_seq1|ZHLZ.comp52493_c0_seq1|	http://www.genome.jp/kegg-bin/show_pathway?ko00051
Fatty acid degradation	KEGG PATHWAY	ko00052	4	124	0.3223	0.922761	ZHLZ.comp26757_c0_seq1|ZHLZ.comp26910_c0_seq1|ZHLZ.comp27138_c0_seq1|ZHLZ.comp53276_c0_seq1|ZHLZ.comp55628_c0_seq1|ZHLZ.comp60133_c0_seq1|	http://www.genome.jp/kegg-bin/show_pathway?ko00052
Synthesis and degradation of ketone bodies	KEGG PATHWAY	ko00053	3	94	0.4424	0.998492	ZHLZ.comp35702_c0_seq1|ZHLZ.comp49114_c0_seq1|ZHLZ.comp49213_c0_seq1|ZHLZ.comp49635_c0_seq1|ZHLZ.comp49797_c0_seq1|ZHLZ.comp52113_c0_seq3|	http://www.genome.jp/kegg-bin/show_pathway?ko00053
Cutin, suberine and wax biosynthesis	KEGG PATHWAY	ko00061	8	84	0.0003298	0.00445005	ZHLZ.comp27781_c0_seq1|ZHLZ.comp43654_c0_seq1|ZHLZ.comp45166_c0_seq1|ZHLZ.comp45776_c0_seq1|ZHLZ.comp48345_c1_seq1|ZHLZ.comp53444_c0_seq1|ZHLZ.comp53640_c0_seq1|ZHLZ.comp53640_c1_seq1|ZHLZ.comp59648_c0_seq1|ZHLZ.comp59692_c0_seq1|ZHLZ.comp59918_c0_seq1|	http://www.genome.jp/kegg-bin/show_pathway?ko00061
Steroid biosynthesis	KEGG PATHWAY	ko00062	5	64	0.009812	0.088308	ZHLZ.comp26923_c0_seq1|ZHLZ.comp45514_c0_seq1|ZHLZ.comp47338_c0_seq1|ZHLZ.comp48801_c0_seq1|ZHLZ.comp55945_c1_seq1|ZHLZ.comp55945_c1_seq2|ZHLZ.comp56214_c0_seq2|ZHLZ.comp56214_c1_seq2|ZHLZ.comp58384_c0_seq1|ZHLZ.comp58561_c2_seq2|	http://www.genome.jp/kegg-bin/show_pathway?ko00062
Ubiquinone and other terpenoid-quinone biosynthesis	KEGG PATHWAY	ko00071	5	105	0.06341	0.367778	ZHLZ.comp35702_c0_seq1|ZHLZ.comp43654_c0_seq1|ZHLZ.comp45166_c0_seq1|ZHLZ.comp45488_c0_seq1|ZHLZ.comp49635_c0_seq1|ZHLZ.comp49797_c0_seq1|ZHLZ.comp58329_c1_seq1|ZHLZ.comp58913_c0_seq1|	http://www.genome.jp/kegg-bin/show_pathway?ko00071
Oxidative phosphorylation	KEGG PATHWAY	ko00072	1	15	0.2642	0.811249	ZHLZ.comp53936_c0_seq1|	http://www.genome.jp/kegg-bin/show_pathway?ko00072
Photosynthesis	KEGG PATHWAY	ko00073	2	42	0.209	0.72732	ZHLZ.comp35736_c0_seq1|ZHLZ.comp46620_c2_seq1|ZHLZ.comp48839_c1_seq1|ZHLZ.comp57069_c0_seq10|ZHLZ.comp57069_c0_seq4|	http://www.genome.jp/kegg-bin/show_pathway?ko00073
Arginine biosynthesis	KEGG PATHWAY	ko00100	1	82	0.9999	0.9999	ZHLZ.comp43205_c0_seq1|	http://www.genome.jp/kegg-bin/show_pathway?ko00100
Purine metabolism	KEGG PATHWAY	ko00130	3	147	0.7726	0.9999	ZHLZ.comp27061_c0_seq1|ZHLZ.comp27061_c1_seq1|ZHLZ.comp27255_c0_seq1|ZHLZ.comp27255_c1_seq1|ZHLZ.comp50520_c0_seq2|	http://www.genome.jp/kegg-bin/show_pathway?ko00130
Pyrimidine metabolism	KEGG PATHWAY	ko00140	2	147	0.9999	0.9999	ZHLZ.comp52706_c0_seq1|ZHLZ.comp55945_c1_seq1|ZHLZ.comp55945_c1_seq2|	http://www.genome.jp/kegg-bin/show_pathway?ko00140
Glycine, serine and threonine metabolism	KEGG PATHWAY	ko00190	7	232	0.2432	0.794092	ZHLZ.comp27213_c0_seq1|ZHLZ.comp35350_c0_seq1|ZHLZ.comp45188_c0_seq1|ZHLZ.comp47468_c2_seq1|ZHLZ.comp49234_c0_seq1|ZHLZ.comp52600_c0_seq1|ZHLZ.comp54988_c0_seq1|ZHLZ.comp60035_c0_seq1|	http://www.genome.jp/kegg-bin/show_pathway?ko00190
Monobactam biosynthesis	KEGG PATHWAY	ko00195	23	75	2.2e-16	5.742e-14	ZHLZ.comp26928_c0_seq1|ZHLZ.comp26931_c0_seq2|ZHLZ.comp26966_c0_seq1|ZHLZ.comp26992_c1_seq1|ZHLZ.comp27098_c0_seq1|ZHLZ.comp35504_c0_seq1|ZHLZ.comp35609_c0_seq1|ZHLZ.comp46106_c0_seq1|ZHLZ.comp46145_c0_seq1|ZHLZ.comp48739_c0_seq1|ZHLZ.comp50068_c0_seq1|ZHLZ.comp50769_c0_seq2|ZHLZ.comp51536_c0_seq1|ZHLZ.comp52537_c1_seq1|ZHLZ.comp59452_c0_seq1|ZHLZ.comp59454_c0_seq1|ZHLZ.comp59475_c0_seq1|ZHLZ.com…	http://www.genome.jp/kegg-bin/show_pathway?ko00195
Cysteine and methionine metabolism	KEGG PATHWAY	ko00196	10	43	1.34e-08	8.7435e-07	ZHLZ.comp26926_c0_seq1|ZHLZ.comp26935_c0_seq1|ZHLZ.comp26985_c0_seq2|ZHLZ.comp35584_c0_seq1|ZHLZ.comp35600_c0_seq1|ZHLZ.comp52210_c1_seq1|ZHLZ.comp57801_c0_seq1|ZHLZ.comp57801_c1_seq1|ZHLZ.comp59522_c0_seq1|ZHLZ.comp59558_c0_seq1|ZHLZ.comp61770_c0_seq1|	http://www.genome.jp/kegg-bin/show_pathway?ko00196
Valine, leucine and isoleucine degradation	KEGG PATHWAY	ko00220	1	79	0.9999	0.9999	ZHLZ.comp59736_c0_seq1|	http://www.genome.jp/kegg-bin/show_pathway?ko00220
Lysine biosynthesis	KEGG PATHWAY	ko00230	8	368	0.8503	0.9999	ZHLZ.comp26906_c0_seq2|ZHLZ.comp35454_c0_seq1|ZHLZ.comp36082_c1_seq1|ZHLZ.comp36082_c2_seq1|ZHLZ.comp47107_c0_seq1|ZHLZ.comp52668_c0_seq1|ZHLZ.comp55009_c0_seq1|ZHLZ.comp56140_c0_seq1|ZHLZ.comp59930_c0_seq1|ZHLZ.comp60133_c0_seq1|	http://www.genome.jp/kegg-bin/show_pathway?ko00230
Lysine degradation	KEGG PATHWAY	ko00240	3	242	0.6397	0.9999	ZHLZ.comp26906_c0_seq2|ZHLZ.comp35454_c0_seq1|ZHLZ.comp55009_c0_seq1|	http://www.genome.jp/kegg-bin/show_pathway?ko00240
Arginine and proline metabolism	KEGG PATHWAY	ko00250	3	96	0.4476	0.998492	ZHLZ.comp45736_c0_seq1|ZHLZ.comp55093_c0_seq1|ZHLZ.comp59736_c0_seq1|	http://www.genome.jp/kegg-bin/show_pathway?ko00250
Prodigiosin biosynthesis	KEGG PATHWAY	ko00260	6	145	0.07644	0.391193	ZHLZ.comp27536_c0_seq1|ZHLZ.comp35523_c0_seq1|ZHLZ.comp43882_c0_seq1|ZHLZ.comp45736_c0_seq1|ZHLZ.comp48853_c0_seq1|ZHLZ.comp52412_c0_seq1|	http://www.genome.jp/kegg-bin/show_pathway?ko00260
Histidine metabolism	KEGG PATHWAY	ko00261	1	68	0.9999	0.9999	ZHLZ.comp52412_c0_seq1|	http://www.genome.jp/kegg-bin/show_pathway?ko00261
Phenylalanine metabolism	KEGG PATHWAY	ko00270	11	162	0.0005519	0.00685933	ZHLZ.comp35521_c0_seq1|ZHLZ.comp45736_c0_seq1|ZHLZ.comp46161_c0_seq1|ZHLZ.comp49915_c0_seq1|ZHLZ.comp49915_c1_seq1|ZHLZ.comp52412_c0_seq1|ZHLZ.comp54886_c0_seq1|ZHLZ.comp56132_c0_seq1|ZHLZ.comp57459_c1_seq1|ZHLZ.comp57462_c0_seq1|ZHLZ.comp57462_c2_seq2|ZHLZ.comp59736_c0_seq1|ZHLZ.comp59797_c0_seq1|	http://www.genome.jp/kegg-bin/show_pathway?ko00270
Phenylalanine, tyrosine and tryptophan biosynthesis	KEGG PATHWAY	ko00280	5	111	0.0764	0.391193	ZHLZ.comp35464_c0_seq1|ZHLZ.comp35702_c0_seq1|ZHLZ.comp45736_c0_seq1|ZHLZ.comp48853_c0_seq1|ZHLZ.comp49635_c0_seq1|ZHLZ.comp49797_c0_seq1|ZHLZ.comp53936_c0_seq1|	http://www.genome.jp/kegg-bin/show_pathway?ko00280
beta-Alanine metabolism	KEGG PATHWAY	ko00300	1	81	0.9999	0.9999	ZHLZ.comp52412_c0_seq1|	http://www.genome.jp/kegg-bin/show_pathway?ko00300
Selenocompound metabolism	KEGG PATHWAY	ko00310	1	129	0.5258	0.9999	ZHLZ.comp35702_c0_seq1|ZHLZ.comp49635_c0_seq1|ZHLZ.comp49797_c0_seq1|	http://www.genome.jp/kegg-bin/show_pathway?ko00310
N-Glycan biosynthesis	KEGG PATHWAY	ko00330	2	177	0.5903	0.9999	ZHLZ.comp35702_c0_seq1|ZHLZ.comp49635_c0_seq1|ZHLZ.comp49797_c0_seq1|ZHLZ.comp59736_c0_seq1|	http://www.genome.jp/kegg-bin/show_pathway?ko00330
Other glycan degradation	KEGG PATHWAY	ko00333	1	39	0.5494	0.9999	ZHLZ.comp59692_c0_seq1|	http://www.genome.jp/kegg-bin/show_pathway?ko00333
Various types of N-glycan biosynthesis	KEGG PATHWAY	ko00340	1	94	0.9999	0.9999	ZHLZ.comp35702_c0_seq1|ZHLZ.comp49635_c0_seq1|ZHLZ.comp49797_c0_seq1|	http://www.genome.jp/kegg-bin/show_pathway?ko00340
Other types of O-glycan biosynthesis	KEGG PATHWAY	ko00350	6	149	0.1305	0.558369	ZHLZ.comp26963_c0_seq1|ZHLZ.comp35523_c0_seq1|ZHLZ.comp45488_c0_seq1|ZHLZ.comp47117_c0_seq1|ZHLZ.comp58329_c1_seq1|ZHLZ.comp59736_c0_seq1|	http://www.genome.jp/kegg-bin/show_pathway?ko00350
Streptomycin biosynthesis	KEGG PATHWAY	ko00360	5	149	0.2332	0.780323	ZHLZ.comp27061_c0_seq1|ZHLZ.comp27061_c1_seq1|ZHLZ.comp27255_c0_seq1|ZHLZ.comp27255_c1_seq1|ZHLZ.comp35523_c0_seq1|ZHLZ.comp43564_c0_seq1|ZHLZ.comp43564_c1_seq1|ZHLZ.comp43564_c2_seq1|ZHLZ.comp43564_c3_seq1|ZHLZ.comp59736_c0_seq1|	http://www.genome.jp/kegg-bin/show_pathway?ko00360
Glycosaminoglycan degradation	KEGG PATHWAY	ko00380	2	150	0.7728	0.9999	ZHLZ.comp35702_c0_seq1|ZHLZ.comp49635_c0_seq1|ZHLZ.comp49797_c0_seq1|ZHLZ.comp59437_c0_seq1|	http://www.genome.jp/kegg-bin/show_pathway?ko00380
Peptidoglycan biosynthesis	KEGG PATHWAY	ko00400	5	108	0.06973	0.371419	ZHLZ.comp27539_c0_seq1|ZHLZ.comp43882_c0_seq1|ZHLZ.comp46429_c0_seq1|ZHLZ.comp48345_c0_seq1|ZHLZ.comp59736_c0_seq1|	http://www.genome.jp/kegg-bin/show_pathway?ko00400
Glycerolipid metabolism	KEGG PATHWAY	ko00410	3	76	0.2001	0.720789	ZHLZ.comp35464_c0_seq1|ZHLZ.comp35523_c0_seq1|ZHLZ.comp35702_c0_seq1|ZHLZ.comp49635_c0_seq1|ZHLZ.comp49797_c0_seq1|	http://www.genome.jp/kegg-bin/show_pathway?ko00410
Inositol phosphate metabolism	KEGG PATHWAY	ko00450	2	56	0.3139	0.920538	ZHLZ.comp35521_c0_seq1|ZHLZ.comp57462_c0_seq1|ZHLZ.comp57462_c2_seq2|	http://www.genome.jp/kegg-bin/show_pathway?ko00450
Glycerophospholipid metabolism	KEGG PATHWAY	ko00460	4	80	0.08008	0.40194	ZHLZ.comp43729_c0_seq1|ZHLZ.comp47439_c0_seq1|ZHLZ.comp54462_c0_seq1|ZHLZ.comp54462_c1_seq1|ZHLZ.comp54462_c1_seq2|ZHLZ.comp54869_c0_seq1|ZHLZ.comp54886_c0_seq1|ZHLZ.comp57437_c1_seq2|ZHLZ.comp58678_c0_seq2|	http://www.genome.jp/kegg-bin/show_pathway?ko00460
Sphingolipid metabolism	KEGG PATHWAY	ko00480	4	82	0.08586	0.421539	ZHLZ.comp27280_c1_seq1|ZHLZ.comp35384_c0_seq1|ZHLZ.comp41023_c0_seq1|ZHLZ.comp45310_c1_seq1|ZHLZ.comp45740_c0_seq1|ZHLZ.comp45903_c0_seq1|ZHLZ.comp46945_c0_seq1|ZHLZ.comp47918_c0_seq1|ZHLZ.comp49114_c0_seq1|ZHLZ.comp49213_c0_seq1|ZHLZ.comp54113_c0_seq1|ZHLZ.comp55275_c1_seq1|	http://www.genome.jp/kegg-bin/show_pathway?ko00480
Glycosphingolipid biosynthesis - globo and isoglobo series	KEGG PATHWAY	ko00500	11	147	0.000242	0.00371541	ZHLZ.comp43729_c0_seq1|ZHLZ.comp47439_c0_seq1|ZHLZ.comp50082_c0_seq1|ZHLZ.comp51503_c0_seq1|ZHLZ.comp51503_c1_seq1|ZHLZ.comp51503_c3_seq1|ZHLZ.comp52173_c0_seq1|ZHLZ.comp53234_c1_seq2|ZHLZ.comp53234_c1_seq3|ZHLZ.comp53276_c0_seq1|ZHLZ.comp54462_c0_seq1|ZHLZ.comp54462_c1_seq1|ZHLZ.comp54462_c1_seq2|ZHLZ.comp54763_c0_seq1|ZHLZ.comp54801_c0_seq1|ZHLZ.comp54869_c0_seq1|ZHLZ.comp55291_c1_seq1|ZHLZ.com…	http://www.genome.jp/kegg-bin/show_pathway?ko00500
Glycosphingolipid biosynthesis - ganglio series	KEGG PATHWAY	ko00510	1	80	0.9999	0.9999	ZHLZ.comp59514_c0_seq1|	http://www.genome.jp/kegg-bin/show_pathway?ko00510
Pyruvate metabolism	KEGG PATHWAY	ko00511	2	20	0.06134	0.363858	ZHLZ.comp25006_c0_seq1|ZHLZ.comp51403_c0_seq2|	http://www.genome.jp/kegg-bin/show_pathway?ko00511
Chloroalkane and chloroalkene degradation	KEGG PATHWAY	ko00513	2	83	0.6854	0.9999	ZHLZ.comp25006_c0_seq1|ZHLZ.comp59514_c0_seq1|	http://www.genome.jp/kegg-bin/show_pathway?ko00513
Naphthalene degradation	KEGG PATHWAY	ko00514	1	27	0.4242	0.988537	ZHLZ.comp27320_c0_seq1|	http://www.genome.jp/kegg-bin/show_pathway?ko00514
Glyoxylate and dicarboxylate metabolism	KEGG PATHWAY	ko00520	10	260	0.04648	0.295885	ZHLZ.comp25006_c0_seq1|ZHLZ.comp26793_c0_seq1|ZHLZ.comp27138_c0_seq1|ZHLZ.comp46824_c0_seq1|ZHLZ.comp48606_c0_seq1|ZHLZ.comp48606_c0_seq2|ZHLZ.comp48859_c0_seq1|ZHLZ.comp51304_c0_seq1|ZHLZ.comp52113_c0_seq3|ZHLZ.comp54763_c0_seq1|ZHLZ.comp60133_c0_seq1|ZHLZ.comp64075_c0_seq1|	http://www.genome.jp/kegg-bin/show_pathway?ko00520
Propanoate metabolism	KEGG PATHWAY	ko00521	1	43	0.5847	0.9999	ZHLZ.comp60133_c0_seq1|	http://www.genome.jp/kegg-bin/show_pathway?ko00521
Butanoate metabolism	KEGG PATHWAY	ko00531	2	43	0.2165	0.733851	ZHLZ.comp25006_c0_seq1|ZHLZ.comp48524_c0_seq1|	http://www.genome.jp/kegg-bin/show_pathway?ko00531
Methane metabolism	KEGG PATHWAY	ko00550	1	73	0.9999	0.9999	ZHLZ.comp52228_c0_seq1|	http://www.genome.jp/kegg-bin/show_pathway?ko00550
Carbon fixation in photosynthetic organisms	KEGG PATHWAY	ko00561	7	114	0.009004	0.0870387	ZHLZ.comp26932_c0_seq1|ZHLZ.comp30332_c0_seq1|ZHLZ.comp35702_c0_seq1|ZHLZ.comp36137_c0_seq1|ZHLZ.comp37484_c0_seq1|ZHLZ.comp49048_c0_seq1|ZHLZ.comp49635_c0_seq1|ZHLZ.comp49797_c0_seq1|ZHLZ.comp51990_c0_seq1|ZHLZ.comp59675_c0_seq1|ZHLZ.comp64075_c0_seq1|	http://www.genome.jp/kegg-bin/show_pathway?ko00561
Carbon fixation pathways in prokaryotes	KEGG PATHWAY	ko00562	2	113	0.9999	0.9999	ZHLZ.comp45546_c0_seq1|ZHLZ.comp46496_c0_seq1|	http://www.genome.jp/kegg-bin/show_pathway?ko00562
Thiamine metabolism	KEGG PATHWAY	ko00564	4	162	0.5729	0.9999	ZHLZ.comp26932_c0_seq1|ZHLZ.comp36137_c0_seq1|ZHLZ.comp51990_c0_seq1|ZHLZ.comp55452_c0_seq2|ZHLZ.comp59915_c0_seq1|	http://www.genome.jp/kegg-bin/show_pathway?ko00564
Nicotinate and nicotinamide metabolism	KEGG PATHWAY	ko00591	2	54	0.299	0.886807	ZHLZ.comp47430_c0_seq1|ZHLZ.comp47430_c1_seq1|ZHLZ.comp54069_c0_seq1|ZHLZ.comp56023_c0_seq1|ZHLZ.comp58977_c1_seq1|	http://www.genome.jp/kegg-bin/show_pathway?ko00591
Biotin metabolism	KEGG PATHWAY	ko00592	6	66	0.002276	0.0247515	ZHLZ.comp49790_c0_seq1|ZHLZ.comp53363_c0_seq1|ZHLZ.comp54069_c0_seq1|ZHLZ.comp55008_c0_seq1|ZHLZ.comp55606_c0_seq1|ZHLZ.comp56023_c0_seq1|ZHLZ.comp58913_c0_seq1|	http://www.genome.jp/kegg-bin/show_pathway?ko00592
Retinol metabolism	KEGG PATHWAY	ko00600	2	67	0.3943	0.951094	ZHLZ.comp49001_c0_seq2|ZHLZ.comp49001_c1_seq1|ZHLZ.comp52466_c0_seq1|	http://www.genome.jp/kegg-bin/show_pathway?ko00600
Porphyrin and chlorophyll metabolism	KEGG PATHWAY	ko00603	1	38	0.5401	0.9999	ZHLZ.comp25006_c0_seq1|	http://www.genome.jp/kegg-bin/show_pathway?ko00603
Terpenoid backbone biosynthesis	KEGG PATHWAY	ko00604	1	46	0.6094	0.9999	ZHLZ.comp25006_c0_seq1|	http://www.genome.jp/kegg-bin/show_pathway?ko00604
Indole alkaloid biosynthesis	KEGG PATHWAY	ko00620	11	128	7.116e-05	0.00123818	ZHLZ.comp27189_c0_seq1|ZHLZ.comp35702_c0_seq1|ZHLZ.comp36000_c0_seq1|ZHLZ.comp36082_c1_seq1|ZHLZ.comp36082_c2_seq1|ZHLZ.comp45776_c0_seq1|ZHLZ.comp46161_c0_seq1|ZHLZ.comp46348_c1_seq1|ZHLZ.comp48853_c0_seq1|ZHLZ.comp49635_c0_seq1|ZHLZ.comp49797_c0_seq1|ZHLZ.comp52668_c0_seq1|ZHLZ.comp54484_c2_seq1|ZHLZ.comp57293_c1_seq1|ZHLZ.comp57459_c1_seq1|ZHLZ.comp59918_c0_seq1|ZHLZ.comp60222_c0_seq1|	http://www.genome.jp/kegg-bin/show_pathway?ko00620
Monoterpenoid biosynthesis	KEGG PATHWAY	ko00625	3	73	0.1847	0.708922	ZHLZ.comp35702_c0_seq1|ZHLZ.comp45488_c0_seq1|ZHLZ.comp49635_c0_seq1|ZHLZ.comp49797_c0_seq1|ZHLZ.comp58329_c1_seq1|	http://www.genome.jp/kegg-bin/show_pathway?ko00625
Limonene and pinene degradation	KEGG PATHWAY	ko00626	2	90	0.7043	0.9999	ZHLZ.comp45488_c0_seq1|ZHLZ.comp58329_c1_seq1|	http://www.genome.jp/kegg-bin/show_pathway?ko00626
Diterpenoid biosynthesis	KEGG PATHWAY	ko00630	6	156	0.1395	0.58725	ZHLZ.comp46161_c0_seq1|ZHLZ.comp48853_c0_seq1|ZHLZ.comp54402_c0_seq1|ZHLZ.comp57459_c1_seq1|ZHLZ.comp59434_c0_seq1|ZHLZ.comp59437_c0_seq1|	http://www.genome.jp/kegg-bin/show_pathway?ko00630
Brassinosteroid biosynthesis	KEGG PATHWAY	ko00640	4	149	0.549	0.9999	ZHLZ.comp35464_c0_seq1|ZHLZ.comp45776_c0_seq1|ZHLZ.comp48853_c0_seq1|ZHLZ.comp59918_c0_seq1|	http://www.genome.jp/kegg-bin/show_pathway?ko00640
Carotenoid biosynthesis	KEGG PATHWAY	ko00650	2	135	0.9999	0.9999	ZHLZ.comp53936_c0_seq1|ZHLZ.comp55093_c0_seq1|	http://www.genome.jp/kegg-bin/show_pathway?ko00650
Sesquiterpenoid and triterpenoid biosynthesis	KEGG PATHWAY	ko00680	5	249	0.9999	0.9999	ZHLZ.comp26757_c0_seq1|ZHLZ.comp26910_c0_seq1|ZHLZ.comp35381_c0_seq1|ZHLZ.comp45488_c0_seq1|ZHLZ.comp46813_c0_seq1|ZHLZ.comp54402_c0_seq1|	http://www.genome.jp/kegg-bin/show_pathway?ko00680
Nitrogen metabolism	KEGG PATHWAY	ko00710	11	60	3.642e-08	1.87877e-06	ZHLZ.comp27237_c0_seq1|ZHLZ.comp35381_c0_seq1|ZHLZ.comp35974_c0_seq1|ZHLZ.comp36000_c0_seq1|ZHLZ.comp45546_c0_seq1|ZHLZ.comp46161_c0_seq1|ZHLZ.comp48016_c0_seq1|ZHLZ.comp53861_c0_seq1|ZHLZ.comp53861_c1_seq1|ZHLZ.comp56799_c0_seq1|ZHLZ.comp56799_c1_seq3|ZHLZ.comp57459_c1_seq1|ZHLZ.comp58735_c1_seq3|ZHLZ.comp59434_c0_seq1|ZHLZ.comp59736_c0_seq1|	http://www.genome.jp/kegg-bin/show_pathway?ko00710
Sulfur metabolism	KEGG PATHWAY	ko00720	3	148	0.9999	0.9999	ZHLZ.comp45776_c0_seq1|ZHLZ.comp54426_c0_seq1|ZHLZ.comp59542_c0_seq1|ZHLZ.comp59918_c0_seq1|	http://www.genome.jp/kegg-bin/show_pathway?ko00720
Flavone and flavonol biosynthesis	KEGG PATHWAY	ko00730	3	65	0.1454	0.592959	ZHLZ.comp56115_c0_seq1|ZHLZ.comp58022_c0_seq5|ZHLZ.comp58777_c6_seq9|ZHLZ.comp59474_c0_seq1|	http://www.genome.jp/kegg-bin/show_pathway?ko00730
Stilbenoid, diarylheptanoid and gingerol biosynthesis	KEGG PATHWAY	ko00760	1	145	0.3761	0.951094	ZHLZ.comp55009_c0_seq1|	http://www.genome.jp/kegg-bin/show_pathway?ko00760
Tropane, piperidine and pyridine alkaloid biosynthesis	KEGG PATHWAY	ko00780	3	52	0.08872	0.421539	ZHLZ.comp27781_c0_seq1|ZHLZ.comp59648_c0_seq1|ZHLZ.comp59692_c0_seq1|	http://www.genome.jp/kegg-bin/show_pathway?ko00780
Insect hormone biosynthesis	KEGG PATHWAY	ko00830	2	73	0.6606	0.9999	ZHLZ.comp45488_c0_seq1|ZHLZ.comp58329_c1_seq1|	http://www.genome.jp/kegg-bin/show_pathway?ko00830
Biosynthesis of ansamycins	KEGG PATHWAY	ko00860	4	263	0.8232	0.9999	ZHLZ.comp35595_c0_seq1|ZHLZ.comp50461_c0_seq1|ZHLZ.comp55502_c0_seq1|ZHLZ.comp57620_c1_seq1|	http://www.genome.jp/kegg-bin/show_pathway?ko00860
Biosynthesis of antibiotics	KEGG PATHWAY	ko00900	11	103	9.351e-06	0.000221874	ZHLZ.comp27339_c0_seq1|ZHLZ.comp35837_c0_seq1|ZHLZ.comp37355_c0_seq1|ZHLZ.comp43393_c0_seq1|ZHLZ.comp44095_c0_seq1|ZHLZ.comp44095_c1_seq1|ZHLZ.comp44788_c0_seq1|ZHLZ.comp48084_c0_seq1|ZHLZ.comp53936_c0_seq1|ZHLZ.comp56115_c0_seq1|ZHLZ.comp57620_c1_seq1|ZHLZ.comp58022_c0_seq5|ZHLZ.comp59540_c0_seq1|	http://www.genome.jp/kegg-bin/show_pathway?ko00900
Carbon metabolism	KEGG PATHWAY	ko00901	1	61	0.9999	0.9999	ZHLZ.comp57839_c0_seq7|	http://www.genome.jp/kegg-bin/show_pathway?ko00901
2-Oxocarboxylic acid metabolism	KEGG PATHWAY	ko00902	1	84	0.9999	0.9999	ZHLZ.comp43081_c0_seq1|ZHLZ.comp55105_c1_seq1|ZHLZ.comp58816_c1_seq34|	http://www.genome.jp/kegg-bin/show_pathway?ko00902
Degradation of aromatic compounds	KEGG PATHWAY	ko00903	1	77	0.9999	0.9999	ZHLZ.comp35702_c0_seq1|ZHLZ.comp49635_c0_seq1|ZHLZ.comp49797_c0_seq1|	http://www.genome.jp/kegg-bin/show_pathway?ko00903
Biosynthesis of amino acids	KEGG PATHWAY	ko00904	1	156	0.3813	0.951094	ZHLZ.comp58775_c0_seq39|	http://www.genome.jp/kegg-bin/show_pathway?ko00904
Vancomycin resistance	KEGG PATHWAY	ko00905	2	41	0.2016	0.720789	ZHLZ.comp59405_c3_seq1|ZHLZ.comp59969_c0_seq1|	http://www.genome.jp/kegg-bin/show_pathway?ko00905
ABC transporters	KEGG PATHWAY	ko00906	5	162	0.3892	0.951094	ZHLZ.comp48415_c2_seq1|ZHLZ.comp51734_c0_seq1|ZHLZ.comp51919_c0_seq1|ZHLZ.comp53180_c5_seq1|ZHLZ.comp59016_c0_seq1|	http://www.genome.jp/kegg-bin/show_pathway?ko00906
Two-component system	KEGG PATHWAY	ko00909	1	160	0.385	0.951094	ZHLZ.comp27339_c0_seq1|	http://www.genome.jp/kegg-bin/show_pathway?ko00909
Biofilm formation - Escherichia coli	KEGG PATHWAY	ko00910	2	80	0.6776	0.9999	ZHLZ.comp50706_c0_seq1|ZHLZ.comp58000_c5_seq1|	http://www.genome.jp/kegg-bin/show_pathway?ko00910
Ribosome biogenesis in eukaryotes	KEGG PATHWAY	ko00920	3	132	0.7511	0.9999	ZHLZ.comp35493_c0_seq1|ZHLZ.comp54886_c0_seq1|ZHLZ.comp59797_c0_seq1|	http://www.genome.jp/kegg-bin/show_pathway?ko00920
Ribosome	KEGG PATHWAY	ko00940	13	101	1.739e-07	5.67349e-06	ZHLZ.comp27061_c0_seq1|ZHLZ.comp27061_c1_seq1|ZHLZ.comp27255_c0_seq1|ZHLZ.comp27255_c1_seq1|ZHLZ.comp35478_c0_seq1|ZHLZ.comp43564_c0_seq1|ZHLZ.comp43564_c1_seq1|ZHLZ.comp43564_c2_seq1|ZHLZ.comp43564_c3_seq1|ZHLZ.comp43729_c0_seq1|ZHLZ.comp47439_c0_seq1|ZHLZ.comp49009_c0_seq1|ZHLZ.comp49125_c1_seq1|ZHLZ.comp49432_c0_seq1|ZHLZ.comp50377_c0_seq1|ZHLZ.comp52787_c0_seq1|ZHLZ.comp53469_c0_seq1|ZHLZ.com…	http://www.genome.jp/kegg-bin/show_pathway?ko00940
RNA transport	KEGG PATHWAY	ko00941	5	91	0.03834	0.265671	ZHLZ.comp27061_c0_seq1|ZHLZ.comp27061_c1_seq1|ZHLZ.comp27950_c0_seq1|ZHLZ.comp35478_c0_seq1|ZHLZ.comp50471_c1_seq1|ZHLZ.comp53323_c0_seq1|ZHLZ.comp56208_c1_seq1|ZHLZ.comp56208_c2_seq1|ZHLZ.comp60846_c0_seq1|	http://www.genome.jp/kegg-bin/show_pathway?ko00941
mRNA surveillance pathway	KEGG PATHWAY	ko00944	1	62	0.9999	0.9999	ZHLZ.comp53323_c0_seq1|ZHLZ.comp56208_c1_seq1|ZHLZ.comp56208_c2_seq1|	http://www.genome.jp/kegg-bin/show_pathway?ko00944
RNA degradation	KEGG PATHWAY	ko00945	2	38	0.1796	0.699636	ZHLZ.comp27061_c0_seq1|ZHLZ.comp27061_c1_seq1|ZHLZ.comp35478_c0_seq1|	http://www.genome.jp/kegg-bin/show_pathway?ko00945
RNA polymerase	KEGG PATHWAY	ko00950	4	139	0.3687	0.951094	ZHLZ.comp26963_c0_seq1|ZHLZ.comp35523_c0_seq1|ZHLZ.comp47117_c0_seq1|ZHLZ.comp59736_c0_seq1|	http://www.genome.jp/kegg-bin/show_pathway?ko00950
Spliceosome	KEGG PATHWAY	ko00960	2	95	0.7182	0.9999	ZHLZ.comp35523_c0_seq1|ZHLZ.comp59736_c0_seq1|	http://www.genome.jp/kegg-bin/show_pathway?ko00960
Protein export	KEGG PATHWAY	ko00965	1	32	0.4802	0.9999	ZHLZ.comp47117_c0_seq1|	http://www.genome.jp/kegg-bin/show_pathway?ko00965
Bacterial secretion system	KEGG PATHWAY	ko00980	3	155	0.9999	0.9999	ZHLZ.comp35384_c0_seq1|ZHLZ.comp41023_c0_seq1|ZHLZ.comp45310_c1_seq1|ZHLZ.comp45488_c0_seq1|ZHLZ.comp45740_c0_seq1|ZHLZ.comp45903_c0_seq1|ZHLZ.comp47918_c0_seq1|ZHLZ.comp54113_c0_seq1|ZHLZ.comp55275_c1_seq1|ZHLZ.comp58329_c1_seq1|	http://www.genome.jp/kegg-bin/show_pathway?ko00980
PPAR signaling pathway	KEGG PATHWAY	ko00981	1	44	0.5931	0.9999	ZHLZ.comp35702_c0_seq1|ZHLZ.comp49635_c0_seq1|ZHLZ.comp49797_c0_seq1|	http://www.genome.jp/kegg-bin/show_pathway?ko00981
MAPK signaling pathway	KEGG PATHWAY	ko00982	3	125	0.7426	0.9999	ZHLZ.comp35384_c0_seq1|ZHLZ.comp41023_c0_seq1|ZHLZ.comp45310_c1_seq1|ZHLZ.comp45488_c0_seq1|ZHLZ.comp45740_c0_seq1|ZHLZ.comp45903_c0_seq1|ZHLZ.comp47918_c0_seq1|ZHLZ.comp54113_c0_seq1|ZHLZ.comp55275_c1_seq1|ZHLZ.comp58329_c1_seq1|	http://www.genome.jp/kegg-bin/show_pathway?ko00982
MAPK signaling pathway - yeast	KEGG PATHWAY	ko01040	5	82	0.02607	0.212633	ZHLZ.comp26934_c0_seq1|ZHLZ.comp47338_c0_seq1|ZHLZ.comp53444_c0_seq1|ZHLZ.comp53640_c0_seq1|ZHLZ.comp53640_c1_seq1|ZHLZ.comp55945_c1_seq1|ZHLZ.comp55945_c1_seq2|ZHLZ.comp58913_c0_seq1|ZHLZ.comp59684_c0_seq1|	http://www.genome.jp/kegg-bin/show_pathway?ko01040
MAPK signaling pathway - fly	KEGG PATHWAY	ko01051	1	65	0.9999	0.9999	ZHLZ.comp53861_c0_seq1|ZHLZ.comp53861_c1_seq1|ZHLZ.comp56799_c0_seq1|ZHLZ.comp56799_c1_seq3|ZHLZ.comp58735_c1_seq3|	http://www.genome.jp/kegg-bin/show_pathway?ko01051
Ras signaling pathway	KEGG PATHWAY	ko01100	154	4666	6.497e-07	1.69572e-05	ZHLZ.comp25006_c0_seq1|ZHLZ.comp26757_c0_seq1|ZHLZ.comp26793_c0_seq1|ZHLZ.comp26906_c0_seq2|ZHLZ.comp26910_c0_seq1|ZHLZ.comp26923_c0_seq1|ZHLZ.comp26928_c0_seq1|ZHLZ.comp26931_c0_seq2|ZHLZ.comp26932_c0_seq1|ZHLZ.comp26963_c0_seq1|ZHLZ.comp26966_c0_seq1|ZHLZ.comp26985_c0_seq2|ZHLZ.comp26992_c1_seq1|ZHLZ.comp27061_c0_seq1|ZHLZ.comp27061_c1_seq1|ZHLZ.comp27098_c0_seq1|ZHLZ.comp27138_c0_seq1|ZHLZ.com…	http://www.genome.jp/kegg-bin/show_pathway?ko01100
Rap1 signaling pathway	KEGG PATHWAY	ko01110	93	2131	4.256e-10	3.70272e-08	ZHLZ.comp26757_c0_seq1|ZHLZ.comp26910_c0_seq1|ZHLZ.comp26932_c0_seq1|ZHLZ.comp26963_c0_seq1|ZHLZ.comp27061_c0_seq1|ZHLZ.comp27061_c1_seq1|ZHLZ.comp27081_c0_seq1|ZHLZ.comp27189_c0_seq1|ZHLZ.comp27213_c0_seq1|ZHLZ.comp27255_c0_seq1|ZHLZ.comp27255_c1_seq1|ZHLZ.comp27539_c0_seq1|ZHLZ.comp27950_c0_seq1|ZHLZ.comp35381_c0_seq1|ZHLZ.comp35454_c0_seq1|ZHLZ.comp35478_c0_seq1|ZHLZ.comp35523_c0_seq1|ZHLZ.com…	http://www.genome.jp/kegg-bin/show_pathway?ko01110
Calcium signaling pathway	KEGG PATHWAY	ko01120	38	2069	0.6195	0.9999	ZHLZ.comp26757_c0_seq1|ZHLZ.comp26910_c0_seq1|ZHLZ.comp27189_c0_seq1|ZHLZ.comp27213_c0_seq1|ZHLZ.comp27237_c0_seq1|ZHLZ.comp35381_c0_seq1|ZHLZ.comp35493_c0_seq1|ZHLZ.comp35702_c0_seq1|ZHLZ.comp35974_c0_seq1|ZHLZ.comp36000_c0_seq1|ZHLZ.comp36082_c1_seq1|ZHLZ.comp36082_c2_seq1|ZHLZ.comp45488_c0_seq1|ZHLZ.comp45546_c0_seq1|ZHLZ.comp45776_c0_seq1|ZHLZ.comp46161_c0_seq1|ZHLZ.comp46348_c1_seq1|ZHLZ.com…	http://www.genome.jp/kegg-bin/show_pathway?ko01120
cGMP-PKG signaling pathway	KEGG PATHWAY	ko01130	44	1919	0.3972	0.951094	ZHLZ.comp26757_c0_seq1|ZHLZ.comp26910_c0_seq1|ZHLZ.comp27189_c0_seq1|ZHLZ.comp27213_c0_seq1|ZHLZ.comp27339_c0_seq1|ZHLZ.comp27539_c0_seq1|ZHLZ.comp35381_c0_seq1|ZHLZ.comp35454_c0_seq1|ZHLZ.comp35702_c0_seq1|ZHLZ.comp35837_c0_seq1|ZHLZ.comp35974_c0_seq1|ZHLZ.comp36082_c1_seq1|ZHLZ.comp36082_c2_seq1|ZHLZ.comp37355_c0_seq1|ZHLZ.comp43205_c0_seq1|ZHLZ.comp43393_c0_seq1|ZHLZ.comp43882_c0_seq1|ZHLZ.com…	http://www.genome.jp/kegg-bin/show_pathway?ko01130
cAMP signaling pathway	KEGG PATHWAY	ko01200	30	452	4.319e-08	1.87877e-06	ZHLZ.comp26757_c0_seq1|ZHLZ.comp26910_c0_seq1|ZHLZ.comp27189_c0_seq1|ZHLZ.comp27213_c0_seq1|ZHLZ.comp27237_c0_seq1|ZHLZ.comp35381_c0_seq1|ZHLZ.comp35464_c0_seq1|ZHLZ.comp35974_c0_seq1|ZHLZ.comp36000_c0_seq1|ZHLZ.comp36082_c1_seq1|ZHLZ.comp36082_c2_seq1|ZHLZ.comp45488_c0_seq1|ZHLZ.comp45546_c0_seq1|ZHLZ.comp45776_c0_seq1|ZHLZ.comp46161_c0_seq1|ZHLZ.comp46348_c1_seq1|ZHLZ.comp46813_c0_seq1|ZHLZ.com…	http://www.genome.jp/kegg-bin/show_pathway?ko01200
HIF-1 signaling pathway	KEGG PATHWAY	ko01210	3	213	0.8037	0.9999	ZHLZ.comp52412_c0_seq1|ZHLZ.comp56613_c0_seq1|ZHLZ.comp59736_c0_seq1|	http://www.genome.jp/kegg-bin/show_pathway?ko01210
FoxO signaling pathway	KEGG PATHWAY	ko01212	12	177	0.0003228	0.00445005	ZHLZ.comp26923_c0_seq1|ZHLZ.comp26934_c0_seq1|ZHLZ.comp27781_c0_seq1|ZHLZ.comp43654_c0_seq1|ZHLZ.comp45166_c0_seq1|ZHLZ.comp45776_c0_seq1|ZHLZ.comp47338_c0_seq1|ZHLZ.comp53444_c0_seq1|ZHLZ.comp53640_c0_seq1|ZHLZ.comp53640_c1_seq1|ZHLZ.comp55945_c1_seq1|ZHLZ.comp55945_c1_seq2|ZHLZ.comp58913_c0_seq1|ZHLZ.comp59648_c0_seq1|ZHLZ.comp59684_c0_seq1|ZHLZ.comp59692_c0_seq1|ZHLZ.comp59918_c0_seq1|	http://www.genome.jp/kegg-bin/show_pathway?ko01212
Phosphatidylinositol signaling system	KEGG PATHWAY	ko01220	3	466	0.02821	0.219086	ZHLZ.comp27061_c0_seq1|ZHLZ.comp27061_c1_seq1|ZHLZ.comp45488_c0_seq1|ZHLZ.comp58329_c1_seq1|	http://www.genome.jp/kegg-bin/show_pathway?ko01220
Sphingolipid signaling pathway	KEGG PATHWAY	ko01230	17	352	0.001733	0.0196658	ZHLZ.comp26757_c0_seq1|ZHLZ.comp26910_c0_seq1|ZHLZ.comp27539_c0_seq1|ZHLZ.comp35381_c0_seq1|ZHLZ.comp35974_c0_seq1|ZHLZ.comp36082_c1_seq1|ZHLZ.comp36082_c2_seq1|ZHLZ.comp43882_c0_seq1|ZHLZ.comp45546_c0_seq1|ZHLZ.comp46429_c0_seq1|ZHLZ.comp46813_c0_seq1|ZHLZ.comp48345_c0_seq1|ZHLZ.comp52412_c0_seq1|ZHLZ.comp52668_c0_seq1|ZHLZ.comp53861_c0_seq1|ZHLZ.comp53861_c1_seq1|ZHLZ.comp54886_c0_seq1|ZHLZ.com…	http://www.genome.jp/kegg-bin/show_pathway?ko01230
Phospholipase D signaling pathway	KEGG PATHWAY	ko01502	1	46	0.6094	0.9999	ZHLZ.comp52228_c0_seq1|	http://www.genome.jp/kegg-bin/show_pathway?ko01502
Plant hormone signal transduction	KEGG PATHWAY	ko01524	2	49	0.2614	0.811249	ZHLZ.comp35384_c0_seq1|ZHLZ.comp35493_c0_seq1|ZHLZ.comp41023_c0_seq1|ZHLZ.comp45310_c1_seq1|ZHLZ.comp45740_c0_seq1|ZHLZ.comp45903_c0_seq1|ZHLZ.comp47918_c0_seq1|ZHLZ.comp54113_c0_seq1|ZHLZ.comp55275_c1_seq1|	http://www.genome.jp/kegg-bin/show_pathway?ko01524
Cell cycle	KEGG PATHWAY	ko02010	1	606	0.000136	0.0022185	ZHLZ.comp56603_c3_seq1|ZHLZ.comp58026_c0_seq1|ZHLZ.comp58288_c0_seq1|	http://www.genome.jp/kegg-bin/show_pathway?ko02010
Cell cycle - yeast	KEGG PATHWAY	ko02020	4	536	0.03868	0.265671	ZHLZ.comp35350_c0_seq1|ZHLZ.comp35493_c0_seq1|ZHLZ.comp49234_c0_seq1|ZHLZ.comp60916_c0_seq1|	http://www.genome.jp/kegg-bin/show_pathway?ko02020
Cell cycle - Caulobacter	KEGG PATHWAY	ko02024	4	338	0.4282	0.989028	ZHLZ.comp43654_c0_seq1|ZHLZ.comp45166_c0_seq1|ZHLZ.comp46062_c0_seq1|ZHLZ.comp47058_c0_seq1|ZHLZ.comp55333_c1_seq1|	http://www.genome.jp/kegg-bin/show_pathway?ko02024
Meiosis - yeast	KEGG PATHWAY	ko02026	1	68	0.9999	0.9999	ZHLZ.comp54763_c0_seq1|	http://www.genome.jp/kegg-bin/show_pathway?ko02026
Oocyte meiosis	KEGG PATHWAY	ko03008	1	83	0.9999	0.9999	ZHLZ.comp46030_c0_seq1|	http://www.genome.jp/kegg-bin/show_pathway?ko03008
p53 signaling pathway	KEGG PATHWAY	ko03010	12	144	4.634e-05	0.000930365	ZHLZ.comp26951_c0_seq1|ZHLZ.comp26959_c0_seq1|ZHLZ.comp26981_c1_seq1|ZHLZ.comp35522_c0_seq1|ZHLZ.comp36126_c0_seq1|ZHLZ.comp47691_c0_seq2|ZHLZ.comp47691_c0_seq3|ZHLZ.comp48374_c0_seq2|ZHLZ.comp48409_c0_seq1|ZHLZ.comp49661_c0_seq1|ZHLZ.comp54204_c0_seq1|ZHLZ.comp59571_c0_seq1|ZHLZ.comp59572_c0_seq1|ZHLZ.comp59673_c0_seq1|ZHLZ.comp60515_c0_seq1|	http://www.genome.jp/kegg-bin/show_pathway?ko03010
Ubiquitin mediated proteolysis	KEGG PATHWAY	ko03013	2	142	0.9999	0.9999	ZHLZ.comp43419_c0_seq1|ZHLZ.comp46030_c0_seq1|	http://www.genome.jp/kegg-bin/show_pathway?ko03013
Autophagy - animal	KEGG PATHWAY	ko03015	1	60	0.9999	0.9999	ZHLZ.comp59946_c0_seq1|	http://www.genome.jp/kegg-bin/show_pathway?ko03015
Protein processing in endoplasmic reticulum	KEGG PATHWAY	ko03018	3	79	0.2158	0.733851	ZHLZ.comp26757_c0_seq1|ZHLZ.comp26910_c0_seq1|ZHLZ.comp43590_c0_seq1|ZHLZ.comp43590_c1_seq1|ZHLZ.comp46813_c0_seq1|	http://www.genome.jp/kegg-bin/show_pathway?ko03018
Lysosome	KEGG PATHWAY	ko03020	1	52	0.9999	0.9999	ZHLZ.comp26906_c0_seq2|	http://www.genome.jp/kegg-bin/show_pathway?ko03020
Endocytosis	KEGG PATHWAY	ko03040	2	123	0.9999	0.9999	ZHLZ.comp45931_c0_seq1|ZHLZ.comp45931_c1_seq1|ZHLZ.comp45931_c3_seq1|ZHLZ.comp50415_c0_seq1|ZHLZ.comp57139_c0_seq1|	http://www.genome.jp/kegg-bin/show_pathway?ko03040
Phagosome	KEGG PATHWAY	ko03060	2	40	0.1942	0.717566	ZHLZ.comp46062_c0_seq1|ZHLZ.comp55333_c1_seq1|	http://www.genome.jp/kegg-bin/show_pathway?ko03060
Peroxisome	KEGG PATHWAY	ko03070	1	76	0.9999	0.9999	ZHLZ.comp55333_c1_seq1|	http://www.genome.jp/kegg-bin/show_pathway?ko03070
mTOR signaling pathway	KEGG PATHWAY	ko03320	3	67	0.1549	0.621983	ZHLZ.comp26959_c1_seq1|ZHLZ.comp43654_c0_seq1|ZHLZ.comp45166_c0_seq1|ZHLZ.comp45313_c1_seq1|ZHLZ.comp56138_c0_seq3|ZHLZ.comp56138_c0_seq4|ZHLZ.comp56138_c0_seq5|ZHLZ.comp58913_c0_seq1|	http://www.genome.jp/kegg-bin/show_pathway?ko03320
PI3K-Akt signaling pathway	KEGG PATHWAY	ko04010	1	199	0.1952	0.717566	ZHLZ.comp45931_c0_seq1|ZHLZ.comp45931_c1_seq1|ZHLZ.comp45931_c3_seq1|ZHLZ.comp50415_c0_seq1|	http://www.genome.jp/kegg-bin/show_pathway?ko04010
AMPK signaling pathway	KEGG PATHWAY	ko04011	3	91	0.4351	0.99615	ZHLZ.comp55452_c0_seq2|ZHLZ.comp59437_c0_seq1|ZHLZ.comp59640_c0_seq1|	http://www.genome.jp/kegg-bin/show_pathway?ko04011
Apoptosis	KEGG PATHWAY	ko04013	1	85	0.9999	0.9999	ZHLZ.comp26946_c0_seq1|	http://www.genome.jp/kegg-bin/show_pathway?ko04013
Longevity regulating pathway	KEGG PATHWAY	ko04014	1	175	0.2717	0.824578	ZHLZ.comp44152_c0_seq1|ZHLZ.comp56130_c0_seq1|ZHLZ.comp57119_c7_seq1|ZHLZ.comp57119_c8_seq1|ZHLZ.comp63264_c0_seq1|	http://www.genome.jp/kegg-bin/show_pathway?ko04014
Longevity regulating pathway - worm	KEGG PATHWAY	ko04015	2	162	0.7754	0.9999	ZHLZ.comp44152_c0_seq1|ZHLZ.comp45601_c0_seq1|ZHLZ.comp56130_c0_seq1|ZHLZ.comp57119_c7_seq1|ZHLZ.comp57119_c8_seq1|ZHLZ.comp63264_c0_seq1|	http://www.genome.jp/kegg-bin/show_pathway?ko04015
Longevity regulating pathway - multiple species	KEGG PATHWAY	ko04016	10	55	1.629e-07	5.67349e-06	ZHLZ.comp35076_c0_seq1|ZHLZ.comp35454_c0_seq1|ZHLZ.comp35860_c0_seq1|ZHLZ.comp44152_c0_seq1|ZHLZ.comp48606_c0_seq1|ZHLZ.comp48606_c0_seq2|ZHLZ.comp48984_c0_seq1|ZHLZ.comp49947_c0_seq1|ZHLZ.comp49947_c1_seq1|ZHLZ.comp50012_c0_seq2|ZHLZ.comp53308_c0_seq1|ZHLZ.comp54170_c0_seq1|ZHLZ.comp54447_c0_seq1|ZHLZ.comp54945_c1_seq2|ZHLZ.comp55114_c0_seq1|ZHLZ.comp56130_c0_seq1|ZHLZ.comp57119_c7_seq1|ZHLZ.com…	http://www.genome.jp/kegg-bin/show_pathway?ko04016
Apoptosis - fly	KEGG PATHWAY	ko04020	5	153	0.2434	0.794092	ZHLZ.comp44152_c0_seq1|ZHLZ.comp46496_c0_seq1|ZHLZ.comp49001_c0_seq2|ZHLZ.comp49001_c1_seq1|ZHLZ.comp56130_c0_seq1|ZHLZ.comp57119_c7_seq1|ZHLZ.comp57119_c8_seq1|ZHLZ.comp58150_c3_seq1|ZHLZ.comp59476_c0_seq1|ZHLZ.comp63264_c0_seq1|	http://www.genome.jp/kegg-bin/show_pathway?ko04020
Apoptosis - multiple species	KEGG PATHWAY	ko04022	3	132	0.7511	0.9999	ZHLZ.comp44152_c0_seq1|ZHLZ.comp56130_c0_seq1|ZHLZ.comp57119_c7_seq1|ZHLZ.comp57119_c8_seq1|ZHLZ.comp58150_c3_seq1|ZHLZ.comp59476_c0_seq1|ZHLZ.comp63264_c0_seq1|	http://www.genome.jp/kegg-bin/show_pathway?ko04022
Cellular senescence	KEGG PATHWAY	ko04024	2	187	0.5946	0.9999	ZHLZ.comp44152_c0_seq1|ZHLZ.comp56130_c0_seq1|ZHLZ.comp57119_c7_seq1|ZHLZ.comp57119_c8_seq1|ZHLZ.comp58913_c0_seq1|ZHLZ.comp63264_c0_seq1|	http://www.genome.jp/kegg-bin/show_pathway?ko04024
Cardiac muscle contraction	KEGG PATHWAY	ko04066	3	87	0.2588	0.811249	ZHLZ.comp27189_c0_seq1|ZHLZ.comp46348_c1_seq1|ZHLZ.comp46813_c0_seq1|ZHLZ.comp54484_c2_seq1|	http://www.genome.jp/kegg-bin/show_pathway?ko04066
Adrenergic signaling in cardiomyocytes	KEGG PATHWAY	ko04068	3	107	0.4802	0.9999	ZHLZ.comp26946_c0_seq1|ZHLZ.comp35701_c0_seq1|ZHLZ.comp59437_c0_seq1|	http://www.genome.jp/kegg-bin/show_pathway?ko04068
Vascular smooth muscle contraction	KEGG PATHWAY	ko04070	3	85	0.2479	0.798789	ZHLZ.comp36137_c0_seq1|ZHLZ.comp44152_c0_seq1|ZHLZ.comp46496_c0_seq1|ZHLZ.comp56130_c0_seq1|ZHLZ.comp57119_c7_seq1|ZHLZ.comp57119_c8_seq1|ZHLZ.comp63264_c0_seq1|	http://www.genome.jp/kegg-bin/show_pathway?ko04070
Wnt signaling pathway	KEGG PATHWAY	ko04071	2	95	0.7182	0.9999	ZHLZ.comp49001_c0_seq2|ZHLZ.comp49001_c1_seq1|ZHLZ.comp59946_c0_seq1|	http://www.genome.jp/kegg-bin/show_pathway?ko04071
Axon guidance	KEGG PATHWAY	ko04072	2	116	0.9999	0.9999	ZHLZ.comp36137_c0_seq1|ZHLZ.comp49001_c0_seq2|ZHLZ.comp49001_c1_seq1|	http://www.genome.jp/kegg-bin/show_pathway?ko04072
VEGF signaling pathway	KEGG PATHWAY	ko04075	13	58	1.552e-10	2.02536e-08	ZHLZ.comp122381_c0_seq1|ZHLZ.comp26919_c0_seq1|ZHLZ.comp27096_c0_seq1|ZHLZ.comp27317_c0_seq1|ZHLZ.comp35076_c0_seq1|ZHLZ.comp35860_c0_seq1|ZHLZ.comp37656_c0_seq1|ZHLZ.comp40423_c0_seq1|ZHLZ.comp45303_c0_seq1|ZHLZ.comp48704_c0_seq1|ZHLZ.comp49947_c0_seq1|ZHLZ.comp49947_c1_seq1|ZHLZ.comp50012_c0_seq2|ZHLZ.comp50884_c0_seq1|ZHLZ.comp51125_c0_seq1|ZHLZ.comp52395_c0_seq1|ZHLZ.comp52953_c0_seq1|ZHLZ.co…	http://www.genome.jp/kegg-bin/show_pathway?ko04075
Apelin signaling pathway	KEGG PATHWAY	ko04110	2	110	0.9999	0.9999	ZHLZ.comp54928_c0_seq1|ZHLZ.comp59640_c0_seq1|	http://www.genome.jp/kegg-bin/show_pathway?ko04110
Hippo signaling pathway	KEGG PATHWAY	ko04111	1	125	0.5242	0.9999	ZHLZ.comp54928_c0_seq1|	http://www.genome.jp/kegg-bin/show_pathway?ko04111
Hippo signaling pathway - fly	KEGG PATHWAY	ko04112	2	33	0.1438	0.592959	ZHLZ.comp26781_c0_seq1|ZHLZ.comp45526_c0_seq1|ZHLZ.comp52228_c0_seq1|	http://www.genome.jp/kegg-bin/show_pathway?ko04112
Focal adhesion	KEGG PATHWAY	ko04113	2	103	0.9999	0.9999	ZHLZ.comp54928_c0_seq1|ZHLZ.comp59946_c0_seq1|	http://www.genome.jp/kegg-bin/show_pathway?ko04113
Adherens junction	KEGG PATHWAY	ko04114	4	83	0.08883	0.421539	ZHLZ.comp44152_c0_seq1|ZHLZ.comp54928_c0_seq1|ZHLZ.comp56130_c0_seq1|ZHLZ.comp57119_c7_seq1|ZHLZ.comp57119_c8_seq1|ZHLZ.comp59640_c0_seq1|ZHLZ.comp59946_c0_seq1|ZHLZ.comp63264_c0_seq1|	http://www.genome.jp/kegg-bin/show_pathway?ko04114
Tight junction	KEGG PATHWAY	ko04115	1	63	0.9999	0.9999	ZHLZ.comp35493_c0_seq1|	http://www.genome.jp/kegg-bin/show_pathway?ko04115
Platelet activation	KEGG PATHWAY	ko04120	3	126	0.7437	0.9999	ZHLZ.comp43556_c0_seq1|ZHLZ.comp54928_c0_seq1|ZHLZ.comp59066_c0_seq1|	http://www.genome.jp/kegg-bin/show_pathway?ko04120
Antigen processing and presentation	KEGG PATHWAY	ko04140	1	105	0.7269	0.9999	ZHLZ.comp35701_c0_seq1|	http://www.genome.jp/kegg-bin/show_pathway?ko04140
Renin-angiotensin system	KEGG PATHWAY	ko04141	7	147	0.03146	0.234602	ZHLZ.comp39253_c0_seq1|ZHLZ.comp43886_c0_seq1|ZHLZ.comp45931_c0_seq1|ZHLZ.comp45931_c1_seq1|ZHLZ.comp45931_c3_seq1|ZHLZ.comp46905_c0_seq1|ZHLZ.comp47034_c0_seq1|ZHLZ.comp47898_c1_seq1|ZHLZ.comp48982_c0_seq1|ZHLZ.comp48982_c1_seq1|ZHLZ.comp48982_c2_seq1|ZHLZ.comp50415_c0_seq1|ZHLZ.comp52163_c0_seq1|ZHLZ.comp59514_c0_seq1|	http://www.genome.jp/kegg-bin/show_pathway?ko04141
NOD-like receptor signaling pathway	KEGG PATHWAY	ko04142	2	108	0.9999	0.9999	ZHLZ.comp25006_c0_seq1|ZHLZ.comp48038_c0_seq1|	http://www.genome.jp/kegg-bin/show_pathway?ko04142
RIG-I-like receptor signaling pathway	KEGG PATHWAY	ko04144	1	185	0.1912	0.717566	ZHLZ.comp45931_c0_seq1|ZHLZ.comp45931_c1_seq1|ZHLZ.comp45931_c3_seq1|ZHLZ.comp50415_c0_seq1|	http://www.genome.jp/kegg-bin/show_pathway?ko04144
Cytosolic DNA-sensing pathway	KEGG PATHWAY	ko04145	1	97	0.9999	0.9999	ZHLZ.comp45601_c0_seq1|	http://www.genome.jp/kegg-bin/show_pathway?ko04145
Toll and Imd signaling pathway	KEGG PATHWAY	ko04146	7	73	0.0007343	0.00871147	ZHLZ.comp26946_c0_seq1|ZHLZ.comp35508_c0_seq1|ZHLZ.comp35837_c0_seq1|ZHLZ.comp43654_c0_seq1|ZHLZ.comp45166_c0_seq1|ZHLZ.comp57069_c0_seq10|ZHLZ.comp57069_c0_seq4|ZHLZ.comp58913_c0_seq1|ZHLZ.comp59437_c0_seq1|	http://www.genome.jp/kegg-bin/show_pathway?ko04146
Plant-pathogen interaction	KEGG PATHWAY	ko04150	1	118	0.7349	0.9999	ZHLZ.comp35701_c0_seq1|	http://www.genome.jp/kegg-bin/show_pathway?ko04150
IL-17 signaling pathway	KEGG PATHWAY	ko04151	3	247	0.4954	0.9999	ZHLZ.comp35701_c0_seq1|ZHLZ.comp59640_c0_seq1|ZHLZ.comp59946_c0_seq1|	http://www.genome.jp/kegg-bin/show_pathway?ko04151
Fc gamma R-mediated phagocytosis	KEGG PATHWAY	ko04152	5	108	0.06973	0.371419	ZHLZ.comp26757_c0_seq1|ZHLZ.comp26910_c0_seq1|ZHLZ.comp35701_c0_seq1|ZHLZ.comp43393_c0_seq1|ZHLZ.comp56927_c0_seq1|ZHLZ.comp59946_c0_seq1|	http://www.genome.jp/kegg-bin/show_pathway?ko04152
Leukocyte transendothelial migration	KEGG PATHWAY	ko04210	3	114	0.5034	0.9999	ZHLZ.comp35493_c0_seq1|ZHLZ.comp45601_c0_seq1|ZHLZ.comp48038_c0_seq1|	http://www.genome.jp/kegg-bin/show_pathway?ko04210
Circadian rhythm	KEGG PATHWAY	ko04211	4	76	0.06912	0.371419	ZHLZ.comp26946_c0_seq1|ZHLZ.comp35701_c0_seq1|ZHLZ.comp56927_c0_seq1|ZHLZ.comp59437_c0_seq1|	http://www.genome.jp/kegg-bin/show_pathway?ko04211
Circadian entrainment	KEGG PATHWAY	ko04212	4	68	0.0497	0.30885	ZHLZ.comp26781_c0_seq1|ZHLZ.comp26946_c0_seq1|ZHLZ.comp45526_c0_seq1|ZHLZ.comp57069_c0_seq10|ZHLZ.comp57069_c0_seq4|ZHLZ.comp59437_c0_seq1|	http://www.genome.jp/kegg-bin/show_pathway?ko04212
Long-term potentiation	KEGG PATHWAY	ko04213	5	61	0.008049	0.0807996	ZHLZ.comp26946_c0_seq1|ZHLZ.comp35508_c0_seq1|ZHLZ.comp35701_c0_seq1|ZHLZ.comp45931_c0_seq1|ZHLZ.comp45931_c1_seq1|ZHLZ.comp45931_c3_seq1|ZHLZ.comp50415_c0_seq1|ZHLZ.comp59437_c0_seq1|	http://www.genome.jp/kegg-bin/show_pathway?ko04213
Synaptic vesicle cycle	KEGG PATHWAY	ko04214	2	58	0.3288	0.922761	ZHLZ.comp27967_c0_seq1|ZHLZ.comp35493_c0_seq1|ZHLZ.comp35564_c0_seq1|	http://www.genome.jp/kegg-bin/show_pathway?ko04214
Neurotrophin signaling pathway	KEGG PATHWAY	ko04215	1	40	0.5585	0.9999	ZHLZ.comp35493_c0_seq1|	http://www.genome.jp/kegg-bin/show_pathway?ko04215
Retrograde endocannabinoid signaling	KEGG PATHWAY	ko04216	4	65	0.04331	0.289844	ZHLZ.comp43654_c0_seq1|ZHLZ.comp45166_c0_seq1|ZHLZ.comp46581_c0_seq1|ZHLZ.comp46581_c2_seq1|ZHLZ.comp47429_c2_seq1|ZHLZ.comp58150_c3_seq1|	http://www.genome.jp/kegg-bin/show_pathway?ko04216
Glutamatergic synapse	KEGG PATHWAY	ko04217	3	107	0.4802	0.9999	ZHLZ.comp46581_c0_seq1|ZHLZ.comp46581_c2_seq1|ZHLZ.comp58150_c3_seq1|ZHLZ.comp59476_c0_seq1|	http://www.genome.jp/kegg-bin/show_pathway?ko04217
GABAergic synapse	KEGG PATHWAY	ko04218	3	122	0.7393	0.9999	ZHLZ.comp44152_c0_seq1|ZHLZ.comp56130_c0_seq1|ZHLZ.comp57119_c7_seq1|ZHLZ.comp57119_c8_seq1|ZHLZ.comp58150_c3_seq1|ZHLZ.comp59476_c0_seq1|ZHLZ.comp63264_c0_seq1|	http://www.genome.jp/kegg-bin/show_pathway?ko04218
Dopaminergic synapse	KEGG PATHWAY	ko04260	2	65	0.38	0.951094	ZHLZ.comp35350_c0_seq1|ZHLZ.comp49234_c0_seq1|	http://www.genome.jp/kegg-bin/show_pathway?ko04260
Olfactory transduction	KEGG PATHWAY	ko04261	2	104	0.9999	0.9999	ZHLZ.comp44152_c0_seq1|ZHLZ.comp56130_c0_seq1|ZHLZ.comp57119_c7_seq1|ZHLZ.comp57119_c8_seq1|ZHLZ.comp59946_c0_seq1|ZHLZ.comp63264_c0_seq1|	http://www.genome.jp/kegg-bin/show_pathway?ko04261
Phototransduction	KEGG PATHWAY	ko04270	1	113	0.731	0.9999	ZHLZ.comp44152_c0_seq1|ZHLZ.comp56130_c0_seq1|ZHLZ.comp57119_c7_seq1|ZHLZ.comp57119_c8_seq1|ZHLZ.comp63264_c0_seq1|	http://www.genome.jp/kegg-bin/show_pathway?ko04270
Phototransduction - fly	KEGG PATHWAY	ko04310	1	105	0.7269	0.9999	ZHLZ.comp56113_c0_seq1|	http://www.genome.jp/kegg-bin/show_pathway?ko04310
Inflammatory mediator regulation of TRP channels	KEGG PATHWAY	ko04360	1	124	0.524	0.9999	ZHLZ.comp60464_c0_seq1|	http://www.genome.jp/kegg-bin/show_pathway?ko04360
Regulation of actin cytoskeleton	KEGG PATHWAY	ko04370	1	46	0.6094	0.9999	ZHLZ.comp49001_c0_seq2|ZHLZ.comp49001_c1_seq1|	http://www.genome.jp/kegg-bin/show_pathway?ko04370
Insulin signaling pathway	KEGG PATHWAY	ko04371	3	112	0.4966	0.9999	ZHLZ.comp35701_c0_seq1|ZHLZ.comp44152_c0_seq1|ZHLZ.comp49001_c0_seq2|ZHLZ.comp49001_c1_seq1|ZHLZ.comp56130_c0_seq1|ZHLZ.comp57119_c7_seq1|ZHLZ.comp57119_c8_seq1|ZHLZ.comp63264_c0_seq1|	http://www.genome.jp/kegg-bin/show_pathway?ko04371
GnRH signaling pathway	KEGG PATHWAY	ko04390	2	112	0.9999	0.9999	ZHLZ.comp45601_c0_seq1|ZHLZ.comp59640_c0_seq1|	http://www.genome.jp/kegg-bin/show_pathway?ko04390
Ovarian steroidogenesis	KEGG PATHWAY	ko04391	2	53	0.2915	0.8745	ZHLZ.comp45601_c0_seq1|ZHLZ.comp59640_c0_seq1|	http://www.genome.jp/kegg-bin/show_pathway?ko04391
Estrogen signaling pathway	KEGG PATHWAY	ko04510	1	151	0.378	0.951094	ZHLZ.comp45601_c0_seq1|	http://www.genome.jp/kegg-bin/show_pathway?ko04510
Prolactin signaling pathway	KEGG PATHWAY	ko04520	1	61	0.9999	0.9999	ZHLZ.comp45601_c0_seq1|	http://www.genome.jp/kegg-bin/show_pathway?ko04520
Thyroid hormone signaling pathway	KEGG PATHWAY	ko04530	3	103	0.4677	0.9999	ZHLZ.comp35701_c0_seq1|ZHLZ.comp45601_c0_seq1|ZHLZ.comp54309_c0_seq1|	http://www.genome.jp/kegg-bin/show_pathway?ko04530
Adipocytokine signaling pathway	KEGG PATHWAY	ko04611	1	104	0.7265	0.9999	ZHLZ.comp45601_c0_seq1|	http://www.genome.jp/kegg-bin/show_pathway?ko04611
Oxytocin signaling pathway	KEGG PATHWAY	ko04612	2	42	0.209	0.72732	ZHLZ.comp45931_c0_seq1|ZHLZ.comp45931_c1_seq1|ZHLZ.comp45931_c3_seq1|ZHLZ.comp50415_c0_seq1|ZHLZ.comp54309_c0_seq1|	http://www.genome.jp/kegg-bin/show_pathway?ko04612
Glucagon signaling pathway	KEGG PATHWAY	ko04614	1	34	0.501	0.9999	ZHLZ.comp43344_c0_seq1|	http://www.genome.jp/kegg-bin/show_pathway?ko04614
Regulation of lipolysis in adipocytes	KEGG PATHWAY	ko04621	2	152	0.7729	0.9999	ZHLZ.comp51319_c0_seq1|ZHLZ.comp54786_c1_seq1|ZHLZ.comp58150_c3_seq1|	http://www.genome.jp/kegg-bin/show_pathway?ko04621
Renin secretion	KEGG PATHWAY	ko04622	1	54	0.9999	0.9999	ZHLZ.comp51817_c0_seq1|	http://www.genome.jp/kegg-bin/show_pathway?ko04622
Aldosterone synthesis and secretion	KEGG PATHWAY	ko04623	1	53	0.9999	0.9999	ZHLZ.comp26906_c0_seq2|	http://www.genome.jp/kegg-bin/show_pathway?ko04623
Type II diabetes mellitus	KEGG PATHWAY	ko04624	1	49	0.9999	0.9999	ZHLZ.comp60915_c0_seq1|	http://www.genome.jp/kegg-bin/show_pathway?ko04624
Insulin resistance	KEGG PATHWAY	ko04626	9	84	5.732e-05	0.00106861	ZHLZ.comp44152_c0_seq1|ZHLZ.comp47722_c0_seq1|ZHLZ.comp47993_c2_seq1|ZHLZ.comp48984_c0_seq1|ZHLZ.comp54447_c0_seq1|ZHLZ.comp54447_c0_seq4|ZHLZ.comp55114_c0_seq1|ZHLZ.comp56130_c0_seq1|ZHLZ.comp56764_c0_seq1|ZHLZ.comp57119_c7_seq1|ZHLZ.comp57119_c8_seq1|ZHLZ.comp58384_c0_seq1|ZHLZ.comp59921_c0_seq1|ZHLZ.comp63264_c0_seq1|	http://www.genome.jp/kegg-bin/show_pathway?ko04626
Non-alcoholic fatty liver disease	KEGG PATHWAY	ko04657	1	82	0.9999	0.9999	ZHLZ.comp57443_c0_seq2|	http://www.genome.jp/kegg-bin/show_pathway?ko04657
AGE-RAGE signaling pathway in diabetic complications	KEGG PATHWAY	ko04666	2	67	0.3943	0.951094	ZHLZ.comp49001_c0_seq2|ZHLZ.comp49001_c1_seq1|ZHLZ.comp60464_c0_seq1|	http://www.genome.jp/kegg-bin/show_pathway?ko04666
Proximal tubule bicarbonate reclamation	KEGG PATHWAY	ko04670	1	80	0.9999	0.9999	ZHLZ.comp45601_c0_seq1|	http://www.genome.jp/kegg-bin/show_pathway?ko04670
Salivary secretion	KEGG PATHWAY	ko04710	1	27	0.4242	0.988537	ZHLZ.comp35701_c0_seq1|	http://www.genome.jp/kegg-bin/show_pathway?ko04710
Gastric acid secretion	KEGG PATHWAY	ko04712	2	28	0.1099	0.49455	ZHLZ.comp27950_c0_seq1|ZHLZ.comp53088_c0_seq1|ZHLZ.comp60846_c0_seq1|	http://www.genome.jp/kegg-bin/show_pathway?ko04712
Protein digestion and absorption	KEGG PATHWAY	ko04713	1	90	0.9999	0.9999	ZHLZ.comp44152_c0_seq1|ZHLZ.comp56130_c0_seq1|ZHLZ.comp57119_c7_seq1|ZHLZ.comp57119_c8_seq1|ZHLZ.comp63264_c0_seq1|	http://www.genome.jp/kegg-bin/show_pathway?ko04713
Bile secretion	KEGG PATHWAY	ko04720	1	51	0.9999	0.9999	ZHLZ.comp44152_c0_seq1|ZHLZ.comp56130_c0_seq1|ZHLZ.comp57119_c7_seq1|ZHLZ.comp57119_c8_seq1|ZHLZ.comp63264_c0_seq1|	http://www.genome.jp/kegg-bin/show_pathway?ko04720
Alzheimer's disease	KEGG PATHWAY	ko04721	1	53	0.9999	0.9999	ZHLZ.comp61057_c0_seq1|	http://www.genome.jp/kegg-bin/show_pathway?ko04721
Parkinson's disease	KEGG PATHWAY	ko04722	2	96	0.7209	0.9999	ZHLZ.comp44152_c0_seq1|ZHLZ.comp56130_c0_seq1|ZHLZ.comp57119_c7_seq1|ZHLZ.comp57119_c8_seq1|ZHLZ.comp59640_c0_seq1|ZHLZ.comp63264_c0_seq1|	http://www.genome.jp/kegg-bin/show_pathway?ko04722
Amyotrophic lateral sclerosis	KEGG PATHWAY	ko04723	2	139	0.9999	0.9999	ZHLZ.comp59675_c0_seq1|ZHLZ.comp61057_c0_seq1|	http://www.genome.jp/kegg-bin/show_pathway?ko04723
Huntington's disease	KEGG PATHWAY	ko04724	1	94	0.9999	0.9999	ZHLZ.comp44422_c0_seq1|	http://www.genome.jp/kegg-bin/show_pathway?ko04724
Prion diseases	KEGG PATHWAY	ko04727	2	75	0.6653	0.9999	ZHLZ.comp44422_c0_seq1|ZHLZ.comp61057_c0_seq1|	http://www.genome.jp/kegg-bin/show_pathway?ko04727
Amphetamine addiction	KEGG PATHWAY	ko04728	2	96	0.7209	0.9999	ZHLZ.comp44152_c0_seq1|ZHLZ.comp56130_c0_seq1|ZHLZ.comp57119_c7_seq1|ZHLZ.comp57119_c8_seq1|ZHLZ.comp59946_c0_seq1|ZHLZ.comp63264_c0_seq1|	http://www.genome.jp/kegg-bin/show_pathway?ko04728
Morphine addiction	KEGG PATHWAY	ko04740	1	34	0.501	0.9999	ZHLZ.comp44152_c0_seq1|ZHLZ.comp56130_c0_seq1|ZHLZ.comp57119_c7_seq1|ZHLZ.comp57119_c8_seq1|ZHLZ.comp63264_c0_seq1|	http://www.genome.jp/kegg-bin/show_pathway?ko04740
Nicotine addiction	KEGG PATHWAY	ko04744	1	27	0.4242	0.988537	ZHLZ.comp44152_c0_seq1|ZHLZ.comp56130_c0_seq1|ZHLZ.comp57119_c7_seq1|ZHLZ.comp57119_c8_seq1|ZHLZ.comp63264_c0_seq1|	http://www.genome.jp/kegg-bin/show_pathway?ko04744
Alcoholism	KEGG PATHWAY	ko04745	2	30	0.1232	0.545003	ZHLZ.comp44152_c0_seq1|ZHLZ.comp45601_c0_seq1|ZHLZ.comp56130_c0_seq1|ZHLZ.comp57119_c7_seq1|ZHLZ.comp57119_c8_seq1|ZHLZ.comp63264_c0_seq1|	http://www.genome.jp/kegg-bin/show_pathway?ko04745
Bacterial invasion of epithelial cells	KEGG PATHWAY	ko04750	1	104	0.7265	0.9999	ZHLZ.comp44152_c0_seq1|ZHLZ.comp56130_c0_seq1|ZHLZ.comp57119_c7_seq1|ZHLZ.comp57119_c8_seq1|ZHLZ.comp63264_c0_seq1|	http://www.genome.jp/kegg-bin/show_pathway?ko04750
Vibrio cholerae infection	KEGG PATHWAY	ko04810	2	158	0.7741	0.9999	ZHLZ.comp45601_c0_seq1|ZHLZ.comp60464_c0_seq1|	http://www.genome.jp/kegg-bin/show_pathway?ko04810
Pathogenic Escherichia coli infection	KEGG PATHWAY	ko04910	2	91	0.7071	0.9999	ZHLZ.comp35701_c0_seq1|ZHLZ.comp44152_c0_seq1|ZHLZ.comp56130_c0_seq1|ZHLZ.comp57119_c7_seq1|ZHLZ.comp57119_c8_seq1|ZHLZ.comp63264_c0_seq1|	http://www.genome.jp/kegg-bin/show_pathway?ko04910
Shigellosis	KEGG PATHWAY	ko04912	1	70	0.9999	0.9999	ZHLZ.comp44152_c0_seq1|ZHLZ.comp56130_c0_seq1|ZHLZ.comp57119_c7_seq1|ZHLZ.comp57119_c8_seq1|ZHLZ.comp63264_c0_seq1|	http://www.genome.jp/kegg-bin/show_pathway?ko04912
Salmonella infection	KEGG PATHWAY	ko04913	1	64	0.9999	0.9999	ZHLZ.comp52706_c0_seq1|	http://www.genome.jp/kegg-bin/show_pathway?ko04913
Pertussis	KEGG PATHWAY	ko04915	2	75	0.6653	0.9999	ZHLZ.comp44152_c0_seq1|ZHLZ.comp45931_c0_seq1|ZHLZ.comp45931_c1_seq1|ZHLZ.comp45931_c3_seq1|ZHLZ.comp50415_c0_seq1|ZHLZ.comp56130_c0_seq1|ZHLZ.comp57119_c7_seq1|ZHLZ.comp57119_c8_seq1|ZHLZ.comp63264_c0_seq1|	http://www.genome.jp/kegg-bin/show_pathway?ko04915
Legionellosis	KEGG PATHWAY	ko04916	2	74	0.6629	0.9999	ZHLZ.comp44152_c0_seq1|ZHLZ.comp47117_c0_seq1|ZHLZ.comp56130_c0_seq1|ZHLZ.comp57119_c7_seq1|ZHLZ.comp57119_c8_seq1|ZHLZ.comp63264_c0_seq1|	http://www.genome.jp/kegg-bin/show_pathway?ko04916
Toxoplasmosis	KEGG PATHWAY	ko04917	1	69	0.9999	0.9999	ZHLZ.comp52706_c0_seq1|	http://www.genome.jp/kegg-bin/show_pathway?ko04917
Tuberculosis	KEGG PATHWAY	ko04919	2	99	0.9999	0.9999	ZHLZ.comp45601_c0_seq1|ZHLZ.comp46496_c0_seq1|	http://www.genome.jp/kegg-bin/show_pathway?ko04919
Hepatitis B	KEGG PATHWAY	ko04920	3	61	0.1268	0.55158	ZHLZ.comp35701_c0_seq1|ZHLZ.comp43654_c0_seq1|ZHLZ.comp45166_c0_seq1|ZHLZ.comp56927_c0_seq1|	http://www.genome.jp/kegg-bin/show_pathway?ko04920
Measles	KEGG PATHWAY	ko04921	4	125	0.3251	0.922761	ZHLZ.comp35701_c0_seq1|ZHLZ.comp44152_c0_seq1|ZHLZ.comp45069_c0_seq1|ZHLZ.comp45601_c0_seq1|ZHLZ.comp56130_c0_seq1|ZHLZ.comp57119_c7_seq1|ZHLZ.comp57119_c8_seq1|ZHLZ.comp63264_c0_seq1|	http://www.genome.jp/kegg-bin/show_pathway?ko04921
Influenza A	KEGG PATHWAY	ko04922	5	82	0.02607	0.212633	ZHLZ.comp27189_c0_seq1|ZHLZ.comp35701_c0_seq1|ZHLZ.comp36082_c1_seq1|ZHLZ.comp36082_c2_seq1|ZHLZ.comp44152_c0_seq1|ZHLZ.comp46348_c1_seq1|ZHLZ.comp52668_c0_seq1|ZHLZ.comp54484_c2_seq1|ZHLZ.comp56130_c0_seq1|ZHLZ.comp57119_c7_seq1|ZHLZ.comp57119_c8_seq1|ZHLZ.comp63264_c0_seq1|	http://www.genome.jp/kegg-bin/show_pathway?ko04922
Human papillomavirus infection	KEGG PATHWAY	ko04923	1	60	0.9999	0.9999	ZHLZ.comp59675_c0_seq1|	http://www.genome.jp/kegg-bin/show_pathway?ko04923
HTLV-I infection	KEGG PATHWAY	ko04924	1	68	0.9999	0.9999	ZHLZ.comp44152_c0_seq1|ZHLZ.comp56130_c0_seq1|ZHLZ.comp57119_c7_seq1|ZHLZ.comp57119_c8_seq1|ZHLZ.comp63264_c0_seq1|	http://www.genome.jp/kegg-bin/show_pathway?ko04924
Kaposi's sarcoma-associated herpesvirus infection	KEGG PATHWAY	ko04925	2	83	0.6854	0.9999	ZHLZ.comp44152_c0_seq1|ZHLZ.comp45069_c0_seq1|ZHLZ.comp56130_c0_seq1|ZHLZ.comp57119_c7_seq1|ZHLZ.comp57119_c8_seq1|ZHLZ.comp63264_c0_seq1|	http://www.genome.jp/kegg-bin/show_pathway?ko04925
Herpes simplex infection	KEGG PATHWAY	ko04930	1	44	0.5931	0.9999	ZHLZ.comp36082_c1_seq1|ZHLZ.comp36082_c2_seq1|ZHLZ.comp52668_c0_seq1|	http://www.genome.jp/kegg-bin/show_pathway?ko04930
Epstein-Barr virus infection	KEGG PATHWAY	ko04931	1	94	0.9999	0.9999	ZHLZ.comp35701_c0_seq1|	http://www.genome.jp/kegg-bin/show_pathway?ko04931
Pathways in cancer	KEGG PATHWAY	ko04932	6	127	0.04585	0.295885	ZHLZ.comp27213_c0_seq1|ZHLZ.comp35350_c0_seq1|ZHLZ.comp35493_c0_seq1|ZHLZ.comp35701_c0_seq1|ZHLZ.comp49234_c0_seq1|ZHLZ.comp56927_c0_seq1|	http://www.genome.jp/kegg-bin/show_pathway?ko04932
Transcriptional misregulation in cancer	KEGG PATHWAY	ko04933	1	85	0.9999	0.9999	ZHLZ.comp46496_c0_seq1|	http://www.genome.jp/kegg-bin/show_pathway?ko04933
Viral carcinogenesis	KEGG PATHWAY	ko04964	1	32	0.4802	0.9999	ZHLZ.comp46161_c0_seq1|	http://www.genome.jp/kegg-bin/show_pathway?ko04964
Proteoglycans in cancer	KEGG PATHWAY	ko04970	1	81	0.9999	0.9999	ZHLZ.comp44152_c0_seq1|ZHLZ.comp56130_c0_seq1|ZHLZ.comp57119_c7_seq1|ZHLZ.comp57119_c8_seq1|ZHLZ.comp63264_c0_seq1|	http://www.genome.jp/kegg-bin/show_pathway?ko04970
MicroRNAs in cancer	KEGG PATHWAY	ko04971	1	64	0.9999	0.9999	ZHLZ.comp44152_c0_seq1|ZHLZ.comp56130_c0_seq1|ZHLZ.comp57119_c7_seq1|ZHLZ.comp57119_c8_seq1|ZHLZ.comp63264_c0_seq1|	http://www.genome.jp/kegg-bin/show_pathway?ko04971
Colorectal cancer	KEGG PATHWAY	ko04974	1	104	0.7265	0.9999	ZHLZ.comp44422_c0_seq1|	http://www.genome.jp/kegg-bin/show_pathway?ko04974
Glioma	KEGG PATHWAY	ko04976	2	235	0.3407	0.936028	ZHLZ.comp43393_c0_seq1|ZHLZ.comp56603_c3_seq1|ZHLZ.comp58026_c0_seq1|ZHLZ.comp58288_c0_seq1|	http://www.genome.jp/kegg-bin/show_pathway?ko04976
Small cell lung cancer	KEGG PATHWAY	ko04978	1	61	0.9999	0.9999	ZHLZ.comp46581_c0_seq1|ZHLZ.comp46581_c2_seq1|	http://www.genome.jp/kegg-bin/show_pathway?ko04978
Central carbon metabolism in cancer	KEGG PATHWAY	ko05010	7	151	0.03558	0.257955	ZHLZ.comp27213_c0_seq1|ZHLZ.comp35350_c0_seq1|ZHLZ.comp35493_c0_seq1|ZHLZ.comp44152_c0_seq1|ZHLZ.comp45188_c0_seq1|ZHLZ.comp49234_c0_seq1|ZHLZ.comp54988_c0_seq1|ZHLZ.comp56130_c0_seq1|ZHLZ.comp57119_c7_seq1|ZHLZ.comp57119_c8_seq1|ZHLZ.comp63264_c0_seq1|	http://www.genome.jp/kegg-bin/show_pathway?ko05010
Choline metabolism in cancer	KEGG PATHWAY	ko05012	8	137	0.007303	0.0762433	ZHLZ.comp27213_c0_seq1|ZHLZ.comp35350_c0_seq1|ZHLZ.comp35493_c0_seq1|ZHLZ.comp45188_c0_seq1|ZHLZ.comp49234_c0_seq1|ZHLZ.comp54988_c0_seq1|ZHLZ.comp58150_c3_seq1|ZHLZ.comp59476_c0_seq1|	http://www.genome.jp/kegg-bin/show_pathway?ko05012
Systemic lupus erythematosus	KEGG PATHWAY	ko05014	3	54	0.09672	0.442876	ZHLZ.comp35493_c0_seq1|ZHLZ.comp35508_c0_seq1|ZHLZ.comp59437_c0_seq1|	http://www.genome.jp/kegg-bin/show_pathway?ko05014
Hypertrophic cardiomyopathy	KEGG PATHWAY	ko05016	11	153	0.000341	0.00445005	ZHLZ.comp26906_c0_seq2|ZHLZ.comp26946_c0_seq1|ZHLZ.comp27213_c0_seq1|ZHLZ.comp35350_c0_seq1|ZHLZ.comp35493_c0_seq1|ZHLZ.comp35508_c0_seq1|ZHLZ.comp45188_c0_seq1|ZHLZ.comp49234_c0_seq1|ZHLZ.comp54988_c0_seq1|ZHLZ.comp58150_c3_seq1|ZHLZ.comp59476_c0_seq1|	http://www.genome.jp/kegg-bin/show_pathway?ko05016
Arrhythmogenic right ventricular cardiomyopathy	KEGG PATHWAY	ko05020	1	34	0.501	0.9999	ZHLZ.comp35508_c0_seq1|	http://www.genome.jp/kegg-bin/show_pathway?ko05020
Dilated cardiomyopathy	KEGG PATHWAY	ko05031	1	56	0.9999	0.9999	ZHLZ.comp44152_c0_seq1|ZHLZ.comp56130_c0_seq1|ZHLZ.comp57119_c7_seq1|ZHLZ.comp57119_c8_seq1|ZHLZ.comp63264_c0_seq1|	http://www.genome.jp/kegg-bin/show_pathway?ko05031
Viral myocarditis	KEGG PATHWAY	ko05032	1	77	0.9999	0.9999	ZHLZ.comp61057_c0_seq1|	http://www.genome.jp/kegg-bin/show_pathway?ko05032
Caffeine metabolism	KEGG PATHWAY	ko05033	1	35	0.511	0.9999	ZHLZ.comp61057_c0_seq1|	http://www.genome.jp/kegg-bin/show_pathway?ko05033
Chlorocyclohexane and chlorobenzene degradation	KEGG PATHWAY	ko05034	3	95	0.445	0.998492	ZHLZ.comp44152_c0_seq1|ZHLZ.comp52051_c1_seq1|ZHLZ.comp56130_c0_seq1|ZHLZ.comp57119_c7_seq1|ZHLZ.comp57119_c8_seq1|ZHLZ.comp59440_c0_seq1|ZHLZ.comp59503_c0_seq1|ZHLZ.comp63264_c0_seq1|	http://www.genome.jp/kegg-bin/show_pathway?ko05034
Fluorobenzoate degradation	KEGG PATHWAY	ko05100	1	74	0.9999	0.9999	ZHLZ.comp45601_c0_seq1|	http://www.genome.jp/kegg-bin/show_pathway?ko05100
Novobiocin biosynthesis	KEGG PATHWAY	ko05110	1	58	0.9999	0.9999	ZHLZ.comp45601_c0_seq1|	http://www.genome.jp/kegg-bin/show_pathway?ko05110
Phenazine biosynthesis	KEGG PATHWAY	ko05130	1	45	0.6013	0.9999	ZHLZ.comp45601_c0_seq1|	http://www.genome.jp/kegg-bin/show_pathway?ko05130
Taurine and hypotaurine metabolism	KEGG PATHWAY	ko05131	1	66	0.9999	0.9999	ZHLZ.comp45601_c0_seq1|	http://www.genome.jp/kegg-bin/show_pathway?ko05131
Ether lipid metabolism	KEGG PATHWAY	ko05132	1	87	0.9999	0.9999	ZHLZ.comp45601_c0_seq1|	http://www.genome.jp/kegg-bin/show_pathway?ko05132
Arachidonic acid metabolism	KEGG PATHWAY	ko05133	2	90	0.7043	0.9999	ZHLZ.comp44152_c0_seq1|ZHLZ.comp56130_c0_seq1|ZHLZ.comp57119_c7_seq1|ZHLZ.comp57119_c8_seq1|ZHLZ.comp60464_c0_seq1|ZHLZ.comp63264_c0_seq1|	http://www.genome.jp/kegg-bin/show_pathway?ko05133
Toluene degradation	KEGG PATHWAY	ko05134	4	71	0.05658	0.343427	ZHLZ.comp35493_c0_seq1|ZHLZ.comp43419_c0_seq1|ZHLZ.comp45931_c0_seq1|ZHLZ.comp45931_c1_seq1|ZHLZ.comp45931_c3_seq1|ZHLZ.comp50415_c0_seq1|ZHLZ.comp53886_c0_seq1|	http://www.genome.jp/kegg-bin/show_pathway?ko05134
Riboflavin metabolism	KEGG PATHWAY	ko05145	2	98	0.9999	0.9999	ZHLZ.comp35493_c0_seq1|ZHLZ.comp45931_c0_seq1|ZHLZ.comp45931_c1_seq1|ZHLZ.comp45931_c3_seq1|ZHLZ.comp50415_c0_seq1|	http://www.genome.jp/kegg-bin/show_pathway?ko05145
Vitamin B6 metabolism	KEGG PATHWAY	ko05152	3	141	0.7636	0.9999	ZHLZ.comp35493_c0_seq1|ZHLZ.comp44152_c0_seq1|ZHLZ.comp49001_c0_seq2|ZHLZ.comp49001_c1_seq1|ZHLZ.comp56130_c0_seq1|ZHLZ.comp57119_c7_seq1|ZHLZ.comp57119_c8_seq1|ZHLZ.comp63264_c0_seq1|	http://www.genome.jp/kegg-bin/show_pathway?ko05152
Pantothenate and CoA biosynthesis	KEGG PATHWAY	ko05161	1	113	0.731	0.9999	ZHLZ.comp35493_c0_seq1|	http://www.genome.jp/kegg-bin/show_pathway?ko05161
Folate biosynthesis	KEGG PATHWAY	ko05162	1	114	0.7317	0.9999	ZHLZ.comp45931_c0_seq1|ZHLZ.comp45931_c1_seq1|ZHLZ.comp45931_c3_seq1|ZHLZ.comp50415_c0_seq1|	http://www.genome.jp/kegg-bin/show_pathway?ko05162
Aminoacyl-tRNA biosynthesis	KEGG PATHWAY	ko05164	4	128	0.3338	0.926828	ZHLZ.comp35493_c0_seq1|ZHLZ.comp45601_c0_seq1|ZHLZ.comp45931_c0_seq1|ZHLZ.comp45931_c1_seq1|ZHLZ.comp45931_c3_seq1|ZHLZ.comp48084_c0_seq1|ZHLZ.comp50415_c0_seq1|	http://www.genome.jp/kegg-bin/show_pathway?ko05164
Drug metabolism - other enzymes	KEGG PATHWAY	ko05165	3	232	0.6353	0.9999	ZHLZ.comp36082_c1_seq1|ZHLZ.comp36082_c2_seq1|ZHLZ.comp43557_c0_seq1|ZHLZ.comp52668_c0_seq1|ZHLZ.comp56124_c0_seq1|ZHLZ.comp59946_c0_seq1|	http://www.genome.jp/kegg-bin/show_pathway?ko05165
EGFR tyrosine kinase inhibitor resistance	KEGG PATHWAY	ko05166	5	218	0.6314	0.9999	ZHLZ.comp46030_c0_seq1|ZHLZ.comp48084_c0_seq1|ZHLZ.comp54928_c0_seq1|ZHLZ.comp58150_c3_seq1|ZHLZ.comp59476_c0_seq1|	http://www.genome.jp/kegg-bin/show_pathway?ko05166
Endocrine resistance	KEGG PATHWAY	ko05167	1	161	0.386	0.951094	ZHLZ.comp35493_c0_seq1|	http://www.genome.jp/kegg-bin/show_pathway?ko05167
Antifolate resistance	KEGG PATHWAY	ko05168	1	148	0.3767	0.951094	ZHLZ.comp35493_c0_seq1|	http://www.genome.jp/kegg-bin/show_pathway?ko05168
Biofilm formation - Pseudomonas aeruginosa	KEGG PATHWAY	ko05169	4	168	0.5857	0.9999	ZHLZ.comp26906_c0_seq2|ZHLZ.comp45931_c0_seq1|ZHLZ.comp45931_c1_seq1|ZHLZ.comp45931_c3_seq1|ZHLZ.comp46030_c0_seq1|ZHLZ.comp50415_c0_seq1|ZHLZ.comp59640_c0_seq1|	http://www.genome.jp/kegg-bin/show_pathway?ko05169
Nucleotide excision repair	KEGG PATHWAY	ko05200	1	344	0.01685	0.146595	ZHLZ.comp35493_c0_seq1|	http://www.genome.jp/kegg-bin/show_pathway?ko05200
Homologous recombination	KEGG PATHWAY	ko05202	1	158	0.383	0.951094	ZHLZ.comp52051_c1_seq1|ZHLZ.comp59440_c0_seq1|	http://www.genome.jp/kegg-bin/show_pathway?ko05202
Fanconi anemia pathway	KEGG PATHWAY	ko05203	4	173	0.7816	0.9999	ZHLZ.comp36082_c1_seq1|ZHLZ.comp36082_c2_seq1|ZHLZ.comp52668_c0_seq1|ZHLZ.comp54928_c0_seq1|ZHLZ.comp59503_c0_seq1|ZHLZ.comp59640_c0_seq1|	http://www.genome.jp/kegg-bin/show_pathway?ko05203
ErbB signaling pathway	KEGG PATHWAY	ko05204	2	136	0.9999	0.9999	ZHLZ.comp35384_c0_seq1|ZHLZ.comp41023_c0_seq1|ZHLZ.comp45310_c1_seq1|ZHLZ.comp45488_c0_seq1|ZHLZ.comp45740_c0_seq1|ZHLZ.comp45903_c0_seq1|ZHLZ.comp47918_c0_seq1|ZHLZ.comp54113_c0_seq1|ZHLZ.comp55275_c1_seq1|	http://www.genome.jp/kegg-bin/show_pathway?ko05204
Chemokine signaling pathway	KEGG PATHWAY	ko05205	2	170	0.7792	0.9999	ZHLZ.comp45601_c0_seq1|ZHLZ.comp48524_c0_seq1|	http://www.genome.jp/kegg-bin/show_pathway?ko05205
NF-kappa B signaling pathway	KEGG PATHWAY	ko05206	1	233	0.09623	0.442876	ZHLZ.comp56603_c3_seq1|ZHLZ.comp58026_c0_seq1|ZHLZ.comp58288_c0_seq1|	http://www.genome.jp/kegg-bin/show_pathway?ko05206
Mitophagy - animal	KEGG PATHWAY	ko05210	1	60	0.9999	0.9999	ZHLZ.comp35493_c0_seq1|	http://www.genome.jp/kegg-bin/show_pathway?ko05210
Mitophagy - yeast	KEGG PATHWAY	ko05214	1	57	0.9999	0.9999	ZHLZ.comp44152_c0_seq1|ZHLZ.comp56130_c0_seq1|ZHLZ.comp57119_c7_seq1|ZHLZ.comp57119_c8_seq1|ZHLZ.comp63264_c0_seq1|	http://www.genome.jp/kegg-bin/show_pathway?ko05214
Dorso-ventral axis formation	KEGG PATHWAY	ko05222	1	78	0.9999	0.9999	ZHLZ.comp35493_c0_seq1|	http://www.genome.jp/kegg-bin/show_pathway?ko05222
Hedgehog signaling pathway - fly	KEGG PATHWAY	ko05230	5	84	0.02854	0.219086	ZHLZ.comp26757_c0_seq1|ZHLZ.comp26910_c0_seq1|ZHLZ.comp27189_c0_seq1|ZHLZ.comp36082_c1_seq1|ZHLZ.comp36082_c2_seq1|ZHLZ.comp46348_c1_seq1|ZHLZ.comp46945_c0_seq1|ZHLZ.comp52668_c0_seq1|ZHLZ.comp54484_c2_seq1|	http://www.genome.jp/kegg-bin/show_pathway?ko05230
TGF-beta signaling pathway	KEGG PATHWAY	ko05231	1	73	0.9999	0.9999	ZHLZ.comp36137_c0_seq1|	http://www.genome.jp/kegg-bin/show_pathway?ko05231
Osteoclast differentiation	KEGG PATHWAY	ko05322	2	49	0.2614	0.811249	ZHLZ.comp52051_c1_seq1|ZHLZ.comp59440_c0_seq1|ZHLZ.comp59503_c0_seq1|	http://www.genome.jp/kegg-bin/show_pathway?ko05322
Gap junction	KEGG PATHWAY	ko05410	2	79	0.6751	0.9999	ZHLZ.comp35701_c0_seq1|ZHLZ.comp45601_c0_seq1|	http://www.genome.jp/kegg-bin/show_pathway?ko05410
Signaling pathways regulating pluripotency of stem cells	KEGG PATHWAY	ko05412	1	68	0.9999	0.9999	ZHLZ.comp45601_c0_seq1|	http://www.genome.jp/kegg-bin/show_pathway?ko05412
Toll-like receptor signaling pathway	KEGG PATHWAY	ko05414	1	87	0.9999	0.9999	ZHLZ.comp45601_c0_seq1|	http://www.genome.jp/kegg-bin/show_pathway?ko05414
Natural killer cell mediated cytotoxicity	KEGG PATHWAY	ko05416	2	38	0.1796	0.699636	ZHLZ.comp35493_c0_seq1|ZHLZ.comp45601_c0_seq1|	http://www.genome.jp/kegg-bin/show_pathway?ko05416
T cell receptor signaling pathway	KEGG PATHWAY	ko05418	5	107	0.06759	0.371419	ZHLZ.comp35384_c0_seq1|ZHLZ.comp35701_c0_seq1|ZHLZ.comp41023_c0_seq1|ZHLZ.comp44152_c0_seq1|ZHLZ.comp45310_c1_seq1|ZHLZ.comp45601_c0_seq1|ZHLZ.comp45740_c0_seq1|ZHLZ.comp45903_c0_seq1|ZHLZ.comp47918_c0_seq1|ZHLZ.comp51319_c0_seq1|ZHLZ.comp54113_c0_seq1|ZHLZ.comp54786_c1_seq1|ZHLZ.comp55275_c1_seq1|ZHLZ.comp56130_c0_seq1|ZHLZ.comp57119_c7_seq1|ZHLZ.comp57119_c8_seq1|ZHLZ.comp63264_c0_seq1|	http://www.genome.jp/kegg-bin/show_pathway?ko05418
B cell receptor signaling pathway	KEGG PATHWAY	ko00010	16	131	3.484e-06	0.000120779	ZHLZ.comp26776_c0_seq1|ZHLZ.comp26910_c0_seq1|ZHLZ.comp27189_c0_seq1|ZHLZ.comp35702_c0_seq1|ZHLZ.comp40126_c0_seq1|ZHLZ.comp40126_c1_seq1|ZHLZ.comp40126_c2_seq1|ZHLZ.comp45488_c0_seq1|ZHLZ.comp45546_c0_seq1|ZHLZ.comp46348_c1_seq1|ZHLZ.comp48310_c1_seq1|ZHLZ.comp48853_c0_seq1|ZHLZ.comp49635_c0_seq1|ZHLZ.comp49797_c0_seq1|ZHLZ.comp50340_c0_seq1|ZHLZ.comp52668_c0_seq1|ZHLZ.comp54484_c2_seq1|ZHLZ.com…	http://www.genome.jp/kegg-bin/show_pathway?ko00010
Fc epsilon RI signaling pathway	KEGG PATHWAY	ko00020	9	78	0.000683	0.0119045	ZHLZ.comp27091_c0_seq1|ZHLZ.comp27189_c0_seq1|ZHLZ.comp27213_c0_seq1|ZHLZ.comp27407_c0_seq1|ZHLZ.comp46348_c1_seq1|ZHLZ.comp48853_c0_seq1|ZHLZ.comp50733_c1_seq1|ZHLZ.comp54484_c2_seq1|ZHLZ.comp55188_c0_seq1|ZHLZ.comp56613_c0_seq1|ZHLZ.comp59542_c0_seq1|ZHLZ.comp60222_c0_seq1|	http://www.genome.jp/kegg-bin/show_pathway?ko00020
TNF signaling pathway	KEGG PATHWAY	ko00030	7	115	0.09244	0.488835	ZHLZ.comp26910_c0_seq1|ZHLZ.comp35725_c0_seq1|ZHLZ.comp46945_c0_seq1|ZHLZ.comp50340_c0_seq1|ZHLZ.comp53861_c0_seq1|ZHLZ.comp53861_c1_seq1|ZHLZ.comp56799_c0_seq1|ZHLZ.comp56799_c1_seq3|ZHLZ.comp58735_c1_seq3|ZHLZ.comp59614_c0_seq1|ZHLZ.comp59942_c0_seq1|ZHLZ.comp60133_c0_seq1|	http://www.genome.jp/kegg-bin/show_pathway?ko00030
Cholinergic synapse	KEGG PATHWAY	ko00040	6	126	0.2896	0.912679	ZHLZ.comp27256_c0_seq1|ZHLZ.comp35725_c0_seq1|ZHLZ.comp38685_c0_seq1|ZHLZ.comp44600_c1_seq1|ZHLZ.comp44600_c3_seq1|ZHLZ.comp44896_c0_seq1|ZHLZ.comp47058_c0_seq1|ZHLZ.comp49885_c0_seq1|ZHLZ.comp52054_c0_seq1|ZHLZ.comp52113_c0_seq3|ZHLZ.comp52552_c1_seq1|ZHLZ.comp53344_c0_seq1|ZHLZ.comp54417_c0_seq1|ZHLZ.comp56605_c0_seq1|ZHLZ.comp56605_c0_seq5|ZHLZ.comp56605_c2_seq1|ZHLZ.comp57143_c0_seq1|ZHLZ.com…	http://www.genome.jp/kegg-bin/show_pathway?ko00040
Serotonergic synapse	KEGG PATHWAY	ko00051	7	163	0.3558	0.930679	ZHLZ.comp26910_c0_seq1|ZHLZ.comp35654_c0_seq1|ZHLZ.comp44096_c0_seq1|ZHLZ.comp45546_c0_seq1|ZHLZ.comp48766_c0_seq1|ZHLZ.comp50340_c0_seq1|ZHLZ.comp57872_c0_seq1|ZHLZ.comp59614_c0_seq1|	http://www.genome.jp/kegg-bin/show_pathway?ko00051
Long-term depression	KEGG PATHWAY	ko00052	5	124	0.4358	0.967565	ZHLZ.comp26910_c0_seq1|ZHLZ.comp53276_c0_seq1|ZHLZ.comp55762_c0_seq1|ZHLZ.comp55762_c0_seq2|ZHLZ.comp58378_c1_seq16|ZHLZ.comp58510_c0_seq1|ZHLZ.comp60133_c0_seq1|	http://www.genome.jp/kegg-bin/show_pathway?ko00052
Progesterone-mediated oocyte maturation	KEGG PATHWAY	ko00053	6	94	0.07064	0.433313	ZHLZ.comp35702_c0_seq1|ZHLZ.comp45544_c0_seq1|ZHLZ.comp46536_c0_seq1|ZHLZ.comp49114_c0_seq1|ZHLZ.comp49213_c0_seq1|ZHLZ.comp49635_c0_seq1|ZHLZ.comp49797_c0_seq1|ZHLZ.comp52113_c0_seq3|ZHLZ.comp59450_c1_seq1|	http://www.genome.jp/kegg-bin/show_pathway?ko00053
Thyroid hormone synthesis	KEGG PATHWAY	ko00061	8	84	0.004474	0.0512541	ZHLZ.comp27781_c0_seq1|ZHLZ.comp43654_c0_seq1|ZHLZ.comp44087_c0_seq2|ZHLZ.comp45776_c0_seq1|ZHLZ.comp48345_c1_seq1|ZHLZ.comp50138_c0_seq1|ZHLZ.comp53444_c0_seq1|ZHLZ.comp53640_c0_seq1|ZHLZ.comp53640_c1_seq1|ZHLZ.comp54400_c0_seq1|ZHLZ.comp55471_c0_seq1|ZHLZ.comp59648_c0_seq1|ZHLZ.comp59692_c0_seq1|	http://www.genome.jp/kegg-bin/show_pathway?ko00061
Relaxin signaling pathway	KEGG PATHWAY	ko00062	3	64	0.4494	0.967565	ZHLZ.comp26923_c0_seq1|ZHLZ.comp45514_c0_seq1|ZHLZ.comp48801_c0_seq1|ZHLZ.comp49315_c0_seq1|ZHLZ.comp57955_c0_seq1|ZHLZ.comp58384_c0_seq1|ZHLZ.comp58561_c2_seq2|	http://www.genome.jp/kegg-bin/show_pathway?ko00062
Type I diabetes mellitus	KEGG PATHWAY	ko00071	8	105	0.01626	0.14092	ZHLZ.comp35702_c0_seq1|ZHLZ.comp43654_c0_seq1|ZHLZ.comp44087_c0_seq2|ZHLZ.comp45488_c0_seq1|ZHLZ.comp48310_c1_seq1|ZHLZ.comp49635_c0_seq1|ZHLZ.comp49797_c0_seq1|ZHLZ.comp50138_c0_seq1|ZHLZ.comp56608_c0_seq2|ZHLZ.comp58329_c1_seq1|ZHLZ.comp58329_c1_seq2|ZHLZ.comp58329_c1_seq3|ZHLZ.comp58406_c1_seq1|ZHLZ.comp58406_c3_seq2|ZHLZ.comp58913_c0_seq1|ZHLZ.comp59631_c0_seq1|	http://www.genome.jp/kegg-bin/show_pathway?ko00071
Endocrine and other factor-regulated calcium reabsorption	KEGG PATHWAY	ko00072	1	15	0.3739	0.930679	ZHLZ.comp53936_c0_seq1|	http://www.genome.jp/kegg-bin/show_pathway?ko00072
Vasopressin-regulated water reabsorption	KEGG PATHWAY	ko00073	4	42	0.03978	0.295509	ZHLZ.comp35736_c0_seq1|ZHLZ.comp35912_c0_seq1|ZHLZ.comp48839_c1_seq1|ZHLZ.comp48839_c2_seq1|ZHLZ.comp57069_c0_seq4|ZHLZ.comp58056_c0_seq2|	http://www.genome.jp/kegg-bin/show_pathway?ko00073
Collecting duct acid secretion	KEGG PATHWAY	ko00100	4	82	0.3221	0.930679	ZHLZ.comp43205_c0_seq1|ZHLZ.comp51869_c0_seq1|ZHLZ.comp52841_c1_seq1|ZHLZ.comp55773_c0_seq1|	http://www.genome.jp/kegg-bin/show_pathway?ko00100
Pancreatic secretion	KEGG PATHWAY	ko00130	6	147	0.4649	0.967565	ZHLZ.comp27061_c0_seq1|ZHLZ.comp27061_c1_seq1|ZHLZ.comp27255_c0_seq1|ZHLZ.comp27255_c1_seq1|ZHLZ.comp27372_c0_seq1|ZHLZ.comp35390_c0_seq1|ZHLZ.comp35875_c0_seq1|ZHLZ.comp47866_c0_seq1|ZHLZ.comp49194_c0_seq1|ZHLZ.comp50520_c0_seq2|ZHLZ.comp51076_c0_seq1|ZHLZ.comp54051_c0_seq1|	http://www.genome.jp/kegg-bin/show_pathway?ko00130
Carbohydrate digestion and absorption	KEGG PATHWAY	ko00190	12	232	0.08146	0.470658	ZHLZ.comp27213_c0_seq1|ZHLZ.comp35350_c0_seq1|ZHLZ.comp35641_c0_seq1|ZHLZ.comp49234_c0_seq1|ZHLZ.comp50733_c1_seq1|ZHLZ.comp52600_c0_seq1|ZHLZ.comp53103_c0_seq3|ZHLZ.comp54988_c0_seq1|ZHLZ.comp58172_c1_seq3|ZHLZ.comp59549_c0_seq1|ZHLZ.comp59623_c0_seq1|ZHLZ.comp59856_c0_seq1|ZHLZ.comp60035_c0_seq1|	http://www.genome.jp/kegg-bin/show_pathway?ko00190
Epithelial cell signaling in Helicobacter pylori infection	KEGG PATHWAY	ko00195	19	75	1.29e-12	2.0124e-10	ZHLZ.comp26928_c0_seq1|ZHLZ.comp26966_c0_seq1|ZHLZ.comp26992_c1_seq1|ZHLZ.comp27133_c1_seq1|ZHLZ.comp35504_c0_seq1|ZHLZ.comp35609_c0_seq1|ZHLZ.comp46106_c0_seq1|ZHLZ.comp48739_c0_seq1|ZHLZ.comp50068_c0_seq1|ZHLZ.comp50769_c0_seq2|ZHLZ.comp51536_c0_seq1|ZHLZ.comp59454_c0_seq1|ZHLZ.comp59475_c0_seq1|ZHLZ.comp59486_c0_seq1|ZHLZ.comp59672_c0_seq1|ZHLZ.comp59691_c0_seq1|ZHLZ.comp60035_c0_seq1|ZHLZ.com…	http://www.genome.jp/kegg-bin/show_pathway?ko00195
Leishmaniasis	KEGG PATHWAY	ko00196	7	43	0.000324	0.006318	ZHLZ.comp26935_c0_seq1|ZHLZ.comp35584_c0_seq1|ZHLZ.comp52437_c0_seq1|ZHLZ.comp52587_c0_seq1|ZHLZ.comp57801_c0_seq1|ZHLZ.comp57801_c1_seq1|ZHLZ.comp59522_c0_seq1|ZHLZ.comp61770_c0_seq1|	http://www.genome.jp/kegg-bin/show_pathway?ko00196
Chagas disease	KEGG PATHWAY	ko00220	2	79	0.9999	0.9999	ZHLZ.comp49188_c0_seq1|ZHLZ.comp56694_c2_seq4|	http://www.genome.jp/kegg-bin/show_pathway?ko00220
Renal cell carcinoma	KEGG PATHWAY	ko00230	10	368	0.878	0.9999	ZHLZ.comp27248_c0_seq1|ZHLZ.comp34728_c0_seq1|ZHLZ.comp35454_c0_seq1|ZHLZ.comp44648_c0_seq1|ZHLZ.comp47107_c0_seq1|ZHLZ.comp51315_c0_seq1|ZHLZ.comp52668_c0_seq1|ZHLZ.comp55009_c0_seq1|ZHLZ.comp56140_c0_seq1|ZHLZ.comp60133_c0_seq1|	http://www.genome.jp/kegg-bin/show_pathway?ko00230
Pancreatic cancer	KEGG PATHWAY	ko00232	1	37	0.9999	0.9999	ZHLZ.comp44648_c0_seq1|	http://www.genome.jp/kegg-bin/show_pathway?ko00232
Endometrial cancer	KEGG PATHWAY	ko00240	6	242	0.8496	0.9999	ZHLZ.comp27161_c0_seq1|ZHLZ.comp27714_c0_seq1|ZHLZ.comp35454_c0_seq1|ZHLZ.comp46448_c0_seq1|ZHLZ.comp55009_c0_seq1|ZHLZ.comp58468_c6_seq1|ZHLZ.comp58468_c6_seq3|ZHLZ.comp58468_c6_seq5|	http://www.genome.jp/kegg-bin/show_pathway?ko00240
Prostate cancer	KEGG PATHWAY	ko00250	5	96	0.2236	0.801876	ZHLZ.comp34728_c0_seq1|ZHLZ.comp35703_c0_seq1|ZHLZ.comp45736_c0_seq1|ZHLZ.comp48489_c0_seq1|ZHLZ.comp56694_c2_seq4|	http://www.genome.jp/kegg-bin/show_pathway?ko00250
Thyroid cancer	KEGG PATHWAY	ko00260	6	145	0.4611	0.967565	ZHLZ.comp27536_c0_seq1|ZHLZ.comp35523_c0_seq1|ZHLZ.comp45736_c0_seq1|ZHLZ.comp48853_c0_seq1|ZHLZ.comp49702_c0_seq1|ZHLZ.comp52412_c0_seq1|ZHLZ.comp55188_c0_seq1|	http://www.genome.jp/kegg-bin/show_pathway?ko00260
Melanoma	KEGG PATHWAY	ko00261	1	68	0.7252	0.9999	ZHLZ.comp52412_c0_seq1|	http://www.genome.jp/kegg-bin/show_pathway?ko00261
Bladder cancer	KEGG PATHWAY	ko00270	12	162	0.004764	0.0512541	CL2317Contig1|ZHLZ.comp35516_c0_seq1|ZHLZ.comp35516_c1_seq1|ZHLZ.comp35516_c2_seq1|ZHLZ.comp35521_c0_seq1|ZHLZ.comp43366_c1_seq1|ZHLZ.comp45365_c1_seq1|ZHLZ.comp45736_c0_seq1|ZHLZ.comp49194_c0_seq1|ZHLZ.comp49915_c0_seq1|ZHLZ.comp49915_c1_seq1|ZHLZ.comp52412_c0_seq1|ZHLZ.comp54300_c1_seq1|ZHLZ.comp55899_c0_seq3|ZHLZ.comp59690_c0_seq1|ZHLZ.comp59797_c0_seq1|	http://www.genome.jp/kegg-bin/show_pathway?ko00270
Chronic myeloid leukemia	KEGG PATHWAY	ko00280	7	111	0.0868	0.4836	ZHLZ.comp35464_c0_seq1|ZHLZ.comp35702_c0_seq1|ZHLZ.comp45736_c0_seq1|ZHLZ.comp48853_c0_seq1|ZHLZ.comp49635_c0_seq1|ZHLZ.comp49797_c0_seq1|ZHLZ.comp53936_c0_seq1|ZHLZ.comp55188_c0_seq1|ZHLZ.comp55230_c0_seq1|ZHLZ.comp59631_c0_seq1|	http://www.genome.jp/kegg-bin/show_pathway?ko00280
Acute myeloid leukemia	KEGG PATHWAY	ko00300	1	81	0.5221	0.967565	ZHLZ.comp52412_c0_seq1|	http://www.genome.jp/kegg-bin/show_pathway?ko00300
Non-small cell lung cancer	KEGG PATHWAY	ko00310	1	129	0.1923	0.740711	ZHLZ.comp35702_c0_seq1|ZHLZ.comp49635_c0_seq1|ZHLZ.comp49797_c0_seq1|	http://www.genome.jp/kegg-bin/show_pathway?ko00310
Breast cancer	KEGG PATHWAY	ko00330	3	177	0.3819	0.930679	ZHLZ.comp35702_c0_seq1|ZHLZ.comp45365_c1_seq1|ZHLZ.comp47074_c0_seq1|ZHLZ.comp49635_c0_seq1|ZHLZ.comp49797_c0_seq1|ZHLZ.comp54760_c0_seq1|	http://www.genome.jp/kegg-bin/show_pathway?ko00330
Rheumatoid arthritis	KEGG PATHWAY	ko00333	2	39	0.338	0.930679	ZHLZ.comp55471_c0_seq1|ZHLZ.comp59692_c0_seq1|	http://www.genome.jp/kegg-bin/show_pathway?ko00333
Biofilm formation - Vibrio cholerae	KEGG PATHWAY	ko00340	1	94	0.374	0.930679	ZHLZ.comp35702_c0_seq1|ZHLZ.comp49635_c0_seq1|ZHLZ.comp49797_c0_seq1|	http://www.genome.jp/kegg-bin/show_pathway?ko00340
Basal transcription factors	KEGG PATHWAY	ko00350	8	149	0.144	0.641829	ZHLZ.comp27372_c0_seq1|ZHLZ.comp35523_c0_seq1|ZHLZ.comp45488_c0_seq1|ZHLZ.comp47117_c0_seq1|ZHLZ.comp47655_c0_seq1|ZHLZ.comp48310_c1_seq1|ZHLZ.comp49194_c0_seq1|ZHLZ.comp52111_c0_seq1|ZHLZ.comp58329_c1_seq1|ZHLZ.comp58329_c1_seq2|ZHLZ.comp58329_c1_seq3|ZHLZ.comp58406_c1_seq1|ZHLZ.comp58406_c3_seq2|	http://www.genome.jp/kegg-bin/show_pathway?ko00350
SNARE interactions in vesicular transport	KEGG PATHWAY	ko00360	8	149	0.144	0.641829	ZHLZ.comp27061_c0_seq1|ZHLZ.comp27061_c1_seq1|ZHLZ.comp27255_c0_seq1|ZHLZ.comp27255_c1_seq1|ZHLZ.comp27372_c0_seq1|ZHLZ.comp35523_c0_seq1|ZHLZ.comp35875_c0_seq1|ZHLZ.comp43564_c0_seq1|ZHLZ.comp43564_c1_seq1|ZHLZ.comp43564_c2_seq1|ZHLZ.comp43564_c3_seq1|ZHLZ.comp46872_c0_seq1|ZHLZ.comp47655_c0_seq1|ZHLZ.comp49194_c0_seq1|ZHLZ.comp51076_c0_seq1|ZHLZ.comp54051_c0_seq1|ZHLZ.comp58732_c7_seq34|ZHLZ.co…	http://www.genome.jp/kegg-bin/show_pathway?ko00360
Autophagy - yeast	KEGG PATHWAY	ko00361	1	123	0.1896	0.740711	ZHLZ.comp35571_c1_seq1|	http://www.genome.jp/kegg-bin/show_pathway?ko00361
Th1 and Th2 cell differentiation	KEGG PATHWAY	ko00364	1	51	0.9999	0.9999	ZHLZ.comp35571_c1_seq1|	http://www.genome.jp/kegg-bin/show_pathway?ko00364
Th17 cell differentiation	KEGG PATHWAY	ko00380	4	150	0.9999	0.9999	ZHLZ.comp27659_c0_seq1|ZHLZ.comp35702_c0_seq1|ZHLZ.comp36142_c1_seq1|ZHLZ.comp46736_c0_seq1|ZHLZ.comp49635_c0_seq1|ZHLZ.comp49797_c0_seq1|	http://www.genome.jp/kegg-bin/show_pathway?ko00380
Fat digestion and absorption	KEGG PATHWAY	ko00400	6	108	0.1506	0.661792	ZHLZ.comp27049_c0_seq1|ZHLZ.comp27539_c0_seq1|ZHLZ.comp36125_c0_seq1|ZHLZ.comp48411_c1_seq1|ZHLZ.comp49194_c0_seq1|ZHLZ.comp57217_c0_seq1|	http://www.genome.jp/kegg-bin/show_pathway?ko00400
	KEGG PATHWAY	ko00401	1	63	0.9999	0.9999	ZHLZ.comp49194_c0_seq1|	http://www.genome.jp/kegg-bin/show_pathway?ko00401
	KEGG PATHWAY	ko00405	1	48	0.9999	0.9999	ZHLZ.comp57217_c0_seq1|	http://www.genome.jp/kegg-bin/show_pathway?ko00405
	KEGG PATHWAY	ko00410	5	76	0.08535	0.4836	ZHLZ.comp27161_c0_seq1|ZHLZ.comp35464_c0_seq1|ZHLZ.comp35523_c0_seq1|ZHLZ.comp35702_c0_seq1|ZHLZ.comp48489_c0_seq1|ZHLZ.comp49635_c0_seq1|ZHLZ.comp49797_c0_seq1|	http://www.genome.jp/kegg-bin/show_pathway?ko00410
	KEGG PATHWAY	ko00430	2	47	0.656	0.9999	ZHLZ.comp30176_c0_seq1|ZHLZ.comp48489_c0_seq1|	http://www.genome.jp/kegg-bin/show_pathway?ko00430
	KEGG PATHWAY	ko00450	3	56	0.2474	0.848229	ZHLZ.comp35521_c0_seq1|ZHLZ.comp55117_c0_seq1|ZHLZ.comp55899_c0_seq3|	http://www.genome.jp/kegg-bin/show_pathway?ko00450
	KEGG PATHWAY	ko00460	4	80	0.3138	0.930679	ZHLZ.comp26845_c0_seq1|ZHLZ.comp30176_c0_seq1|ZHLZ.comp36142_c0_seq1|ZHLZ.comp43729_c0_seq1|ZHLZ.comp54272_c0_seq1|ZHLZ.comp54462_c0_seq1|ZHLZ.comp54462_c1_seq1|ZHLZ.comp54462_c1_seq2|ZHLZ.comp54869_c0_seq1|ZHLZ.comp58678_c0_seq2|ZHLZ.comp58678_c0_seq4|	http://www.genome.jp/kegg-bin/show_pathway?ko00460
	KEGG PATHWAY	ko00480	6	82	0.04117	0.298722	ZHLZ.comp26878_c0_seq1|ZHLZ.comp30176_c0_seq1|ZHLZ.comp35384_c0_seq1|ZHLZ.comp35980_c0_seq1|ZHLZ.comp45103_c0_seq1|ZHLZ.comp45310_c1_seq1|ZHLZ.comp45740_c0_seq1|ZHLZ.comp45903_c0_seq1|ZHLZ.comp46945_c0_seq1|ZHLZ.comp49114_c0_seq1|ZHLZ.comp49125_c2_seq1|ZHLZ.comp49213_c0_seq1|ZHLZ.comp51834_c0_seq1|ZHLZ.comp54113_c0_seq1|ZHLZ.comp55275_c1_seq1|ZHLZ.comp59593_c0_seq1|ZHLZ.comp86401_c0_seq1|	http://www.genome.jp/kegg-bin/show_pathway?ko00480
	KEGG PATHWAY	ko00500	14	147	0.0002099	0.00467777	ZHLZ.comp26845_c0_seq1|ZHLZ.comp34958_c0_seq1|ZHLZ.comp36142_c0_seq1|ZHLZ.comp43729_c0_seq1|ZHLZ.comp47956_c0_seq1|ZHLZ.comp47956_c1_seq1|ZHLZ.comp48766_c0_seq1|ZHLZ.comp50582_c0_seq1|ZHLZ.comp51503_c3_seq1|ZHLZ.comp52460_c0_seq1|ZHLZ.comp52545_c0_seq1|ZHLZ.comp53061_c1_seq1|ZHLZ.comp53234_c1_seq1|ZHLZ.comp53234_c1_seq2|ZHLZ.comp53234_c1_seq3|ZHLZ.comp53276_c0_seq1|ZHLZ.comp53296_c0_seq7|ZHLZ.com…	http://www.genome.jp/kegg-bin/show_pathway?ko00500
	KEGG PATHWAY	ko00510	1	80	0.522	0.967565	ZHLZ.comp58014_c6_seq3|	http://www.genome.jp/kegg-bin/show_pathway?ko00510
	KEGG PATHWAY	ko00511	1	20	0.4643	0.967565	ZHLZ.comp51403_c0_seq2|	http://www.genome.jp/kegg-bin/show_pathway?ko00511
	KEGG PATHWAY	ko00514	1	27	0.5693	0.9999	ZHLZ.comp27320_c0_seq1|	http://www.genome.jp/kegg-bin/show_pathway?ko00514
	KEGG PATHWAY	ko00520	17	260	0.003636	0.0453773	ZHLZ.comp26771_c0_seq1|ZHLZ.comp26793_c0_seq1|ZHLZ.comp26996_c0_seq1|ZHLZ.comp27233_c0_seq1|ZHLZ.comp39519_c0_seq1|ZHLZ.comp44096_c0_seq1|ZHLZ.comp44918_c0_seq2|ZHLZ.comp46536_c0_seq1|ZHLZ.comp48606_c0_seq1|ZHLZ.comp48606_c0_seq2|ZHLZ.comp48766_c0_seq1|ZHLZ.comp48859_c0_seq1|ZHLZ.comp51294_c0_seq1|ZHLZ.comp52113_c0_seq3|ZHLZ.comp52555_c0_seq1|ZHLZ.comp56463_c0_seq1|ZHLZ.comp56716_c0_seq1|ZHLZ.com…	http://www.genome.jp/kegg-bin/show_pathway?ko00520
	KEGG PATHWAY	ko00521	2	43	0.3826	0.930679	ZHLZ.comp54096_c0_seq1|ZHLZ.comp60133_c0_seq1|	http://www.genome.jp/kegg-bin/show_pathway?ko00521
	KEGG PATHWAY	ko00531	2	43	0.3826	0.930679	ZHLZ.comp48524_c0_seq1|ZHLZ.comp55877_c0_seq1|	http://www.genome.jp/kegg-bin/show_pathway?ko00531
	KEGG PATHWAY	ko00550	1	73	0.7287	0.9999	ZHLZ.comp52228_c0_seq1|	http://www.genome.jp/kegg-bin/show_pathway?ko00550
	KEGG PATHWAY	ko00561	7	114	0.0909	0.488835	ZHLZ.comp26932_c0_seq1|ZHLZ.comp30332_c0_seq1|ZHLZ.comp35702_c0_seq1|ZHLZ.comp37484_c0_seq1|ZHLZ.comp44389_c0_seq1|ZHLZ.comp49048_c0_seq1|ZHLZ.comp49635_c0_seq1|ZHLZ.comp49797_c0_seq1|ZHLZ.comp51990_c0_seq1|ZHLZ.comp52638_c2_seq6|ZHLZ.comp55790_c0_seq1|ZHLZ.comp64075_c0_seq1|	http://www.genome.jp/kegg-bin/show_pathway?ko00561
	KEGG PATHWAY	ko00562	7	113	0.08945	0.488835	ZHLZ.comp29168_c0_seq1|ZHLZ.comp45546_c0_seq1|ZHLZ.comp49427_c0_seq1|ZHLZ.comp51215_c0_seq1|ZHLZ.comp53141_c0_seq1|ZHLZ.comp53528_c0_seq1|ZHLZ.comp54096_c0_seq1|ZHLZ.comp56499_c3_seq1|	http://www.genome.jp/kegg-bin/show_pathway?ko00562
	KEGG PATHWAY	ko00564	4	162	0.821	0.9999	ZHLZ.comp26932_c0_seq1|ZHLZ.comp44389_c0_seq1|ZHLZ.comp51990_c0_seq1|ZHLZ.comp53141_c0_seq1|ZHLZ.comp53528_c0_seq1|ZHLZ.comp55790_c0_seq1|ZHLZ.comp59915_c0_seq1|	http://www.genome.jp/kegg-bin/show_pathway?ko00564
	KEGG PATHWAY	ko00565	1	55	0.9999	0.9999	ZHLZ.comp53141_c0_seq1|ZHLZ.comp53528_c0_seq1|	http://www.genome.jp/kegg-bin/show_pathway?ko00565
	KEGG PATHWAY	ko00590	2	121	0.5917	0.9999	ZHLZ.comp26878_c0_seq1|ZHLZ.comp30176_c0_seq1|	http://www.genome.jp/kegg-bin/show_pathway?ko00590
	KEGG PATHWAY	ko00591	2	54	0.6823	0.9999	ZHLZ.comp43895_c0_seq2|ZHLZ.comp47430_c0_seq1|ZHLZ.comp47430_c1_seq1|ZHLZ.comp54069_c0_seq1|ZHLZ.comp56023_c0_seq1|ZHLZ.comp58977_c0_seq1|ZHLZ.comp58977_c1_seq1|	http://www.genome.jp/kegg-bin/show_pathway?ko00591
	KEGG PATHWAY	ko00592	10	66	3.468e-05	0.00083232	ZHLZ.comp35501_c0_seq1|ZHLZ.comp48310_c1_seq1|ZHLZ.comp49790_c0_seq1|ZHLZ.comp53363_c0_seq1|ZHLZ.comp54069_c0_seq1|ZHLZ.comp55008_c0_seq1|ZHLZ.comp55606_c0_seq1|ZHLZ.comp56023_c0_seq1|ZHLZ.comp56608_c0_seq2|ZHLZ.comp58406_c1_seq1|ZHLZ.comp58406_c3_seq2|ZHLZ.comp58913_c0_seq1|ZHLZ.comp59606_c0_seq1|ZHLZ.comp59631_c0_seq1|	http://www.genome.jp/kegg-bin/show_pathway?ko00592
	KEGG PATHWAY	ko00600	3	67	0.4627	0.967565	ZHLZ.comp47129_c0_seq1|ZHLZ.comp47129_c2_seq1|ZHLZ.comp52466_c0_seq1|ZHLZ.comp53635_c0_seq1|ZHLZ.comp54434_c1_seq1|	http://www.genome.jp/kegg-bin/show_pathway?ko00600
	KEGG PATHWAY	ko00620	9	128	0.01814	0.152964	ZHLZ.comp27189_c0_seq1|ZHLZ.comp35702_c0_seq1|ZHLZ.comp37284_c1_seq1|ZHLZ.comp45776_c0_seq1|ZHLZ.comp46348_c1_seq1|ZHLZ.comp48853_c0_seq1|ZHLZ.comp49635_c0_seq1|ZHLZ.comp49797_c0_seq1|ZHLZ.comp50033_c0_seq1|ZHLZ.comp52668_c0_seq1|ZHLZ.comp54484_c2_seq1|ZHLZ.comp55188_c0_seq1|ZHLZ.comp57414_c0_seq4|ZHLZ.comp60222_c0_seq1|	http://www.genome.jp/kegg-bin/show_pathway?ko00620
	KEGG PATHWAY	ko00623	1	94	0.374	0.930679	ZHLZ.comp35571_c1_seq1|	http://www.genome.jp/kegg-bin/show_pathway?ko00623
	KEGG PATHWAY	ko00625	3	73	0.492	0.967565	ZHLZ.comp35702_c0_seq1|ZHLZ.comp45488_c0_seq1|ZHLZ.comp49635_c0_seq1|ZHLZ.comp49797_c0_seq1|ZHLZ.comp58329_c1_seq1|ZHLZ.comp58329_c1_seq2|ZHLZ.comp58329_c1_seq3|	http://www.genome.jp/kegg-bin/show_pathway?ko00625
	KEGG PATHWAY	ko00626	2	90	0.9999	0.9999	ZHLZ.comp45488_c0_seq1|ZHLZ.comp58329_c1_seq1|ZHLZ.comp58329_c1_seq2|ZHLZ.comp58329_c1_seq3|	http://www.genome.jp/kegg-bin/show_pathway?ko00626
	KEGG PATHWAY	ko00630	6	156	0.4854	0.967565	ZHLZ.comp33239_c0_seq1|ZHLZ.comp35881_c0_seq1|ZHLZ.comp48853_c0_seq1|ZHLZ.comp54402_c0_seq1|ZHLZ.comp55188_c0_seq1|ZHLZ.comp56694_c2_seq4|ZHLZ.comp59434_c0_seq1|	http://www.genome.jp/kegg-bin/show_pathway?ko00630
	KEGG PATHWAY	ko00640	4	149	0.9999	0.9999	ZHLZ.comp27407_c0_seq1|ZHLZ.comp35464_c0_seq1|ZHLZ.comp45776_c0_seq1|ZHLZ.comp48853_c0_seq1|ZHLZ.comp55188_c0_seq1|	http://www.genome.jp/kegg-bin/show_pathway?ko00640
	KEGG PATHWAY	ko00650	2	135	0.4467	0.967565	ZHLZ.comp48489_c0_seq1|ZHLZ.comp53936_c0_seq1|	http://www.genome.jp/kegg-bin/show_pathway?ko00650
	KEGG PATHWAY	ko00680	6	249	0.7104	0.9999	ZHLZ.comp26910_c0_seq1|ZHLZ.comp37284_c1_seq1|ZHLZ.comp45488_c0_seq1|ZHLZ.comp49702_c0_seq1|ZHLZ.comp50340_c0_seq1|ZHLZ.comp54402_c0_seq1|ZHLZ.comp57414_c0_seq4|ZHLZ.comp59614_c0_seq1|	http://www.genome.jp/kegg-bin/show_pathway?ko00680
	KEGG PATHWAY	ko00710	10	60	1.469e-05	0.000416662	ZHLZ.comp26776_c0_seq1|ZHLZ.comp27237_c0_seq1|ZHLZ.comp33239_c0_seq1|ZHLZ.comp35725_c0_seq1|ZHLZ.comp37284_c1_seq1|ZHLZ.comp45546_c0_seq1|ZHLZ.comp48016_c0_seq1|ZHLZ.comp50340_c0_seq1|ZHLZ.comp53861_c0_seq1|ZHLZ.comp53861_c1_seq1|ZHLZ.comp56799_c0_seq1|ZHLZ.comp56799_c1_seq3|ZHLZ.comp57414_c0_seq4|ZHLZ.comp58735_c1_seq3|ZHLZ.comp59434_c0_seq1|ZHLZ.comp59614_c0_seq1|	http://www.genome.jp/kegg-bin/show_pathway?ko00710
	KEGG PATHWAY	ko00720	3	148	0.6328	0.9999	ZHLZ.comp37284_c1_seq1|ZHLZ.comp45776_c0_seq1|ZHLZ.comp57414_c0_seq4|ZHLZ.comp59542_c0_seq1|	http://www.genome.jp/kegg-bin/show_pathway?ko00720
	KEGG PATHWAY	ko00730	2	65	0.9999	0.9999	ZHLZ.comp27248_c0_seq1|ZHLZ.comp56115_c0_seq1|	http://www.genome.jp/kegg-bin/show_pathway?ko00730
	KEGG PATHWAY	ko00740	1	63	0.9999	0.9999	ZHLZ.comp27103_c0_seq1|	http://www.genome.jp/kegg-bin/show_pathway?ko00740
	KEGG PATHWAY	ko00750	2	52	0.6744	0.9999	ZHLZ.comp43706_c0_seq1|ZHLZ.comp49566_c0_seq2|	http://www.genome.jp/kegg-bin/show_pathway?ko00750
	KEGG PATHWAY	ko00760	1	145	0.138	0.633176	ZHLZ.comp55009_c0_seq1|	http://www.genome.jp/kegg-bin/show_pathway?ko00760
	KEGG PATHWAY	ko00770	1	67	0.7249	0.9999	ZHLZ.comp27161_c0_seq1|	http://www.genome.jp/kegg-bin/show_pathway?ko00770
	KEGG PATHWAY	ko00780	4	52	0.07586	0.446572	ZHLZ.comp27781_c0_seq1|ZHLZ.comp55471_c0_seq1|ZHLZ.comp59648_c0_seq1|ZHLZ.comp59692_c0_seq1|	http://www.genome.jp/kegg-bin/show_pathway?ko00780
	KEGG PATHWAY	ko00790	1	99	0.376	0.930679	ZHLZ.comp49280_c0_seq1|	http://www.genome.jp/kegg-bin/show_pathway?ko00790
	KEGG PATHWAY	ko00830	2	73	0.9999	0.9999	ZHLZ.comp45488_c0_seq1|ZHLZ.comp58329_c1_seq1|ZHLZ.comp58329_c1_seq2|ZHLZ.comp58329_c1_seq3|	http://www.genome.jp/kegg-bin/show_pathway?ko00830
	KEGG PATHWAY	ko00860	6	263	0.5885	0.9999	ZHLZ.comp46526_c0_seq1|ZHLZ.comp55502_c0_seq1|ZHLZ.comp56732_c0_seq1|ZHLZ.comp57620_c1_seq1|ZHLZ.comp58970_c1_seq1|ZHLZ.comp60310_c0_seq1|	http://www.genome.jp/kegg-bin/show_pathway?ko00860
	KEGG PATHWAY	ko00900	13	103	1.916e-05	0.00049816	ZHLZ.comp27339_c0_seq1|ZHLZ.comp35837_c0_seq1|ZHLZ.comp37355_c0_seq1|ZHLZ.comp44095_c0_seq1|ZHLZ.comp44095_c1_seq1|ZHLZ.comp44518_c0_seq1|ZHLZ.comp44788_c0_seq1|ZHLZ.comp48084_c0_seq1|ZHLZ.comp50804_c0_seq1|ZHLZ.comp53936_c0_seq1|ZHLZ.comp56115_c0_seq1|ZHLZ.comp57620_c1_seq1|ZHLZ.comp59540_c0_seq1|ZHLZ.comp59688_c0_seq1|	http://www.genome.jp/kegg-bin/show_pathway?ko00900
	KEGG PATHWAY	ko00901	1	61	0.9999	0.9999	ZHLZ.comp56445_c0_seq1|ZHLZ.comp57839_c0_seq7|	http://www.genome.jp/kegg-bin/show_pathway?ko00901
	KEGG PATHWAY	ko00902	2	84	0.9999	0.9999	ZHLZ.comp55105_c0_seq1|ZHLZ.comp55105_c1_seq1|ZHLZ.comp58816_c1_seq34|	http://www.genome.jp/kegg-bin/show_pathway?ko00902
	KEGG PATHWAY	ko00903	1	77	0.7332	0.9999	ZHLZ.comp35702_c0_seq1|ZHLZ.comp49635_c0_seq1|ZHLZ.comp49797_c0_seq1|	http://www.genome.jp/kegg-bin/show_pathway?ko00903
	KEGG PATHWAY	ko00904	3	156	0.6364	0.9999	ZHLZ.comp255567_c0_seq1|ZHLZ.comp51489_c0_seq1|ZHLZ.comp51534_c0_seq1|ZHLZ.comp52510_c0_seq2|	http://www.genome.jp/kegg-bin/show_pathway?ko00904
	KEGG PATHWAY	ko00905	4	41	0.03686	0.287508	ZHLZ.comp170856_c0_seq1|ZHLZ.comp47622_c1_seq1|ZHLZ.comp52102_c1_seq1|ZHLZ.comp59405_c3_seq1|ZHLZ.comp59969_c0_seq1|	http://www.genome.jp/kegg-bin/show_pathway?ko00905
	KEGG PATHWAY	ko00906	3	162	0.494	0.967565	ZHLZ.comp51734_c0_seq1|ZHLZ.comp53180_c5_seq1|ZHLZ.comp55917_c0_seq1|ZHLZ.comp59016_c0_seq1|	http://www.genome.jp/kegg-bin/show_pathway?ko00906
	KEGG PATHWAY	ko00909	3	160	0.6397	0.9999	ZHLZ.comp27339_c0_seq1|ZHLZ.comp55773_c0_seq1|ZHLZ.comp57200_c0_seq1|	http://www.genome.jp/kegg-bin/show_pathway?ko00909
	KEGG PATHWAY	ko00910	3	80	0.738	0.9999	ZHLZ.comp56694_c2_seq4|ZHLZ.comp57326_c0_seq2|ZHLZ.comp58000_c5_seq1|	http://www.genome.jp/kegg-bin/show_pathway?ko00910
	KEGG PATHWAY	ko00920	5	132	0.6068	0.9999	ZHLZ.comp35493_c0_seq1|ZHLZ.comp35899_c1_seq1|ZHLZ.comp51215_c0_seq1|ZHLZ.comp55899_c0_seq3|ZHLZ.comp59797_c0_seq1|	http://www.genome.jp/kegg-bin/show_pathway?ko00920
	KEGG PATHWAY	ko00940	17	101	1.572e-08	9.80928e-07	CL219Contig1|ZHLZ.comp26845_c0_seq1|ZHLZ.comp27061_c0_seq1|ZHLZ.comp27061_c1_seq1|ZHLZ.comp27255_c0_seq1|ZHLZ.comp27255_c1_seq1|ZHLZ.comp35408_c0_seq1|ZHLZ.comp35478_c0_seq1|ZHLZ.comp35603_c0_seq1|ZHLZ.comp35875_c0_seq1|ZHLZ.comp36142_c0_seq1|ZHLZ.comp43564_c0_seq1|ZHLZ.comp43564_c1_seq1|ZHLZ.comp43564_c2_seq1|ZHLZ.comp43564_c3_seq1|ZHLZ.comp43729_c0_seq1|ZHLZ.comp46872_c0_seq1|ZHLZ.comp48308_c0_…	http://www.genome.jp/kegg-bin/show_pathway?ko00940
	KEGG PATHWAY	ko00941	8	91	0.007219	0.0692545	ZHLZ.comp27061_c0_seq1|ZHLZ.comp27061_c1_seq1|ZHLZ.comp27950_c0_seq1|ZHLZ.comp35478_c0_seq1|ZHLZ.comp46872_c0_seq1|ZHLZ.comp50471_c1_seq1|ZHLZ.comp52919_c0_seq1|ZHLZ.comp53323_c0_seq1|ZHLZ.comp54051_c0_seq1|ZHLZ.comp57832_c0_seq1|ZHLZ.comp58732_c7_seq34|ZHLZ.comp60856_c0_seq1|	http://www.genome.jp/kegg-bin/show_pathway?ko00941
	KEGG PATHWAY	ko00944	1	62	0.9999	0.9999	ZHLZ.comp53323_c0_seq1|	http://www.genome.jp/kegg-bin/show_pathway?ko00944
	KEGG PATHWAY	ko00945	4	38	0.02887	0.237038	ZHLZ.comp27061_c0_seq1|ZHLZ.comp27061_c1_seq1|ZHLZ.comp35478_c0_seq1|ZHLZ.comp46872_c0_seq1|ZHLZ.comp54051_c0_seq1|ZHLZ.comp57832_c0_seq1|ZHLZ.comp58732_c7_seq34|ZHLZ.comp60856_c0_seq1|	http://www.genome.jp/kegg-bin/show_pathway?ko00945
	KEGG PATHWAY	ko00950	3	139	0.8027	0.9999	ZHLZ.comp35523_c0_seq1|ZHLZ.comp47117_c0_seq1|ZHLZ.comp49194_c0_seq1|ZHLZ.comp52111_c0_seq1|	http://www.genome.jp/kegg-bin/show_pathway?ko00950
	KEGG PATHWAY	ko00960	2	95	0.9999	0.9999	ZHLZ.comp35523_c0_seq1|ZHLZ.comp49194_c0_seq1|	http://www.genome.jp/kegg-bin/show_pathway?ko00960
	KEGG PATHWAY	ko00965	2	32	0.2582	0.871252	ZHLZ.comp27180_c0_seq1|ZHLZ.comp47117_c0_seq1|ZHLZ.comp52111_c0_seq1|	http://www.genome.jp/kegg-bin/show_pathway?ko00965
	KEGG PATHWAY	ko00970	3	116	0.9999	0.9999	ZHLZ.comp27847_c0_seq1|ZHLZ.comp55117_c0_seq1|ZHLZ.comp56732_c0_seq1|	http://www.genome.jp/kegg-bin/show_pathway?ko00970
	KEGG PATHWAY	ko00980	3	155	0.6357	0.9999	ZHLZ.comp35384_c0_seq1|ZHLZ.comp35980_c0_seq1|ZHLZ.comp45310_c1_seq1|ZHLZ.comp45488_c0_seq1|ZHLZ.comp45740_c0_seq1|ZHLZ.comp45903_c0_seq1|ZHLZ.comp49125_c2_seq1|ZHLZ.comp51834_c0_seq1|ZHLZ.comp54113_c0_seq1|ZHLZ.comp55275_c1_seq1|ZHLZ.comp58329_c1_seq1|ZHLZ.comp58329_c1_seq2|ZHLZ.comp58329_c1_seq3|ZHLZ.comp59593_c0_seq1|ZHLZ.comp86401_c0_seq1|	http://www.genome.jp/kegg-bin/show_pathway?ko00980
	KEGG PATHWAY	ko00981	1	44	0.9999	0.9999	ZHLZ.comp35702_c0_seq1|ZHLZ.comp49635_c0_seq1|ZHLZ.comp49797_c0_seq1|	http://www.genome.jp/kegg-bin/show_pathway?ko00981
	KEGG PATHWAY	ko00982	4	125	0.7947	0.9999	ZHLZ.comp35384_c0_seq1|ZHLZ.comp35980_c0_seq1|ZHLZ.comp45310_c1_seq1|ZHLZ.comp45488_c0_seq1|ZHLZ.comp45740_c0_seq1|ZHLZ.comp45903_c0_seq1|ZHLZ.comp49125_c2_seq1|ZHLZ.comp51834_c0_seq1|ZHLZ.comp54113_c0_seq1|ZHLZ.comp55275_c1_seq1|ZHLZ.comp58329_c1_seq1|ZHLZ.comp58329_c1_seq2|ZHLZ.comp58329_c1_seq3|ZHLZ.comp58731_c0_seq1|ZHLZ.comp59593_c0_seq1|ZHLZ.comp86401_c0_seq1|	http://www.genome.jp/kegg-bin/show_pathway?ko00982
	KEGG PATHWAY	ko00983	3	72	0.4869	0.967565	ZHLZ.comp27161_c0_seq1|ZHLZ.comp27714_c0_seq1|ZHLZ.comp46448_c0_seq1|	http://www.genome.jp/kegg-bin/show_pathway?ko00983
	KEGG PATHWAY	ko01040	5	82	0.1089	0.530887	ZHLZ.comp26934_c0_seq1|ZHLZ.comp53444_c0_seq1|ZHLZ.comp53640_c0_seq1|ZHLZ.comp53640_c1_seq1|ZHLZ.comp54400_c0_seq1|ZHLZ.comp55471_c0_seq1|ZHLZ.comp58913_c0_seq1|ZHLZ.comp59631_c0_seq1|ZHLZ.comp59684_c0_seq1|	http://www.genome.jp/kegg-bin/show_pathway?ko01040
	KEGG PATHWAY	ko01051	1	65	0.7246	0.9999	ZHLZ.comp53861_c0_seq1|ZHLZ.comp53861_c1_seq1|ZHLZ.comp56799_c0_seq1|ZHLZ.comp56799_c1_seq3|ZHLZ.comp58735_c1_seq3|	http://www.genome.jp/kegg-bin/show_pathway?ko01051
	KEGG PATHWAY	ko01100	207	4666	7.333e-06	0.00022879	CL219Contig1|CL2317Contig1|ZHLZ.comp170856_c0_seq1|ZHLZ.comp26776_c0_seq1|ZHLZ.comp26793_c0_seq1|ZHLZ.comp26845_c0_seq1|ZHLZ.comp26910_c0_seq1|ZHLZ.comp26923_c0_seq1|ZHLZ.comp26928_c0_seq1|ZHLZ.comp26932_c0_seq1|ZHLZ.comp26966_c0_seq1|ZHLZ.comp26992_c1_seq1|ZHLZ.comp26996_c0_seq1|ZHLZ.comp27049_c0_seq1|ZHLZ.comp27061_c0_seq1|ZHLZ.comp27061_c1_seq1|ZHLZ.comp27091_c0_seq1|ZHLZ.comp27103_c0_seq1|ZHL…	http://www.genome.jp/kegg-bin/show_pathway?ko01100
	KEGG PATHWAY	ko01110	120	2131	7.314e-09	7.60656e-07	CL219Contig1|ZHLZ.comp170856_c0_seq1|ZHLZ.comp26776_c0_seq1|ZHLZ.comp26845_c0_seq1|ZHLZ.comp26910_c0_seq1|ZHLZ.comp26932_c0_seq1|ZHLZ.comp27049_c0_seq1|ZHLZ.comp27061_c0_seq1|ZHLZ.comp27061_c1_seq1|ZHLZ.comp27081_c0_seq1|ZHLZ.comp27091_c0_seq1|ZHLZ.comp27189_c0_seq1|ZHLZ.comp27213_c0_seq1|ZHLZ.comp27248_c0_seq1|ZHLZ.comp27255_c0_seq1|ZHLZ.comp27255_c1_seq1|ZHLZ.comp27407_c0_seq1|ZHLZ.comp27539_c0…	http://www.genome.jp/kegg-bin/show_pathway?ko01110
	KEGG PATHWAY	ko01120	46	2069	0.03405	0.2724	ZHLZ.comp26776_c0_seq1|ZHLZ.comp26910_c0_seq1|ZHLZ.comp27091_c0_seq1|ZHLZ.comp27189_c0_seq1|ZHLZ.comp27213_c0_seq1|ZHLZ.comp27237_c0_seq1|ZHLZ.comp27407_c0_seq1|ZHLZ.comp33239_c0_seq1|ZHLZ.comp35317_c0_seq1|ZHLZ.comp35493_c0_seq1|ZHLZ.comp35571_c1_seq1|ZHLZ.comp35702_c0_seq1|ZHLZ.comp35725_c0_seq1|ZHLZ.comp35881_c0_seq1|ZHLZ.comp37284_c1_seq1|ZHLZ.comp43206_c0_seq1|ZHLZ.comp44648_c0_seq1|ZHLZ.com…	http://www.genome.jp/kegg-bin/show_pathway?ko01120
	KEGG PATHWAY	ko01130	58	1919	0.9999	0.9999	ZHLZ.comp26776_c0_seq1|ZHLZ.comp26910_c0_seq1|ZHLZ.comp27049_c0_seq1|ZHLZ.comp27091_c0_seq1|ZHLZ.comp27189_c0_seq1|ZHLZ.comp27213_c0_seq1|ZHLZ.comp27248_c0_seq1|ZHLZ.comp27339_c0_seq1|ZHLZ.comp27407_c0_seq1|ZHLZ.comp27539_c0_seq1|ZHLZ.comp34728_c0_seq1|ZHLZ.comp35454_c0_seq1|ZHLZ.comp35571_c1_seq1|ZHLZ.comp35702_c0_seq1|ZHLZ.comp35725_c0_seq1|ZHLZ.comp35837_c0_seq1|ZHLZ.comp35881_c0_seq1|ZHLZ.com…	http://www.genome.jp/kegg-bin/show_pathway?ko01130
	KEGG PATHWAY	ko01200	29	452	0.0003064	0.006318	ZHLZ.comp26776_c0_seq1|ZHLZ.comp26910_c0_seq1|ZHLZ.comp27091_c0_seq1|ZHLZ.comp27189_c0_seq1|ZHLZ.comp27213_c0_seq1|ZHLZ.comp27237_c0_seq1|ZHLZ.comp27407_c0_seq1|ZHLZ.comp33239_c0_seq1|ZHLZ.comp35464_c0_seq1|ZHLZ.comp35725_c0_seq1|ZHLZ.comp35881_c0_seq1|ZHLZ.comp37284_c1_seq1|ZHLZ.comp45488_c0_seq1|ZHLZ.comp45546_c0_seq1|ZHLZ.comp45776_c0_seq1|ZHLZ.comp46348_c1_seq1|ZHLZ.comp46945_c0_seq1|ZHLZ.com…	http://www.genome.jp/kegg-bin/show_pathway?ko01200
	KEGG PATHWAY	ko01210	2	213	0.07083	0.433313	ZHLZ.comp27091_c0_seq1|ZHLZ.comp52412_c0_seq1|ZHLZ.comp56613_c0_seq1|	http://www.genome.jp/kegg-bin/show_pathway?ko01210
	KEGG PATHWAY	ko01212	12	177	0.01304	0.116242	ZHLZ.comp26923_c0_seq1|ZHLZ.comp26934_c0_seq1|ZHLZ.comp27781_c0_seq1|ZHLZ.comp43654_c0_seq1|ZHLZ.comp44087_c0_seq2|ZHLZ.comp45776_c0_seq1|ZHLZ.comp50138_c0_seq1|ZHLZ.comp53444_c0_seq1|ZHLZ.comp53640_c0_seq1|ZHLZ.comp53640_c1_seq1|ZHLZ.comp54400_c0_seq1|ZHLZ.comp55471_c0_seq1|ZHLZ.comp56608_c0_seq2|ZHLZ.comp58913_c0_seq1|ZHLZ.comp59631_c0_seq1|ZHLZ.comp59648_c0_seq1|ZHLZ.comp59684_c0_seq1|ZHLZ.com…	http://www.genome.jp/kegg-bin/show_pathway?ko01212
	KEGG PATHWAY	ko01220	3	466	0.0007971	0.0130892	ZHLZ.comp27061_c0_seq1|ZHLZ.comp27061_c1_seq1|ZHLZ.comp45488_c0_seq1|ZHLZ.comp54051_c0_seq1|ZHLZ.comp58329_c1_seq1|ZHLZ.comp58329_c1_seq2|ZHLZ.comp58329_c1_seq3|	http://www.genome.jp/kegg-bin/show_pathway?ko01220
	KEGG PATHWAY	ko01230	21	352	0.004683	0.0512541	ZHLZ.comp26776_c0_seq1|ZHLZ.comp26910_c0_seq1|ZHLZ.comp27049_c0_seq1|ZHLZ.comp27091_c0_seq1|ZHLZ.comp27539_c0_seq1|ZHLZ.comp35516_c0_seq1|ZHLZ.comp35516_c1_seq1|ZHLZ.comp35516_c2_seq1|ZHLZ.comp35725_c0_seq1|ZHLZ.comp36125_c0_seq1|ZHLZ.comp45546_c0_seq1|ZHLZ.comp48411_c1_seq1|ZHLZ.comp49188_c0_seq1|ZHLZ.comp49194_c0_seq1|ZHLZ.comp49702_c0_seq1|ZHLZ.comp50340_c0_seq1|ZHLZ.comp52412_c0_seq1|ZHLZ.com…	http://www.genome.jp/kegg-bin/show_pathway?ko01230
	KEGG PATHWAY	ko01502	1	46	0.9999	0.9999	ZHLZ.comp52228_c0_seq1|	http://www.genome.jp/kegg-bin/show_pathway?ko01502
	KEGG PATHWAY	ko01521	1	72	0.7278	0.9999	ZHLZ.comp55656_c0_seq1|	http://www.genome.jp/kegg-bin/show_pathway?ko01521
	KEGG PATHWAY	ko01522	1	88	0.5275	0.967565	ZHLZ.comp55656_c0_seq1|	http://www.genome.jp/kegg-bin/show_pathway?ko01522
	KEGG PATHWAY	ko01523	1	55	0.9999	0.9999	ZHLZ.comp49280_c0_seq1|	http://www.genome.jp/kegg-bin/show_pathway?ko01523
	KEGG PATHWAY	ko01524	3	49	0.1909	0.740711	ZHLZ.comp35384_c0_seq1|ZHLZ.comp35493_c0_seq1|ZHLZ.comp35980_c0_seq1|ZHLZ.comp45310_c1_seq1|ZHLZ.comp45740_c0_seq1|ZHLZ.comp45903_c0_seq1|ZHLZ.comp48129_c0_seq1|ZHLZ.comp49125_c2_seq1|ZHLZ.comp51834_c0_seq1|ZHLZ.comp54113_c0_seq1|ZHLZ.comp55275_c1_seq1|ZHLZ.comp59593_c0_seq1|ZHLZ.comp86401_c0_seq1|	http://www.genome.jp/kegg-bin/show_pathway?ko01524
	KEGG PATHWAY	ko02010	1	606	3.02e-07	1.40177e-05	ZHLZ.comp55992_c0_seq1|ZHLZ.comp58026_c0_seq1|ZHLZ.comp58288_c0_seq1|	http://www.genome.jp/kegg-bin/show_pathway?ko02010
	KEGG PATHWAY	ko02020	4	536	0.0006868	0.0119045	ZHLZ.comp35350_c0_seq1|ZHLZ.comp35493_c0_seq1|ZHLZ.comp49234_c0_seq1|ZHLZ.comp56694_c2_seq4|	http://www.genome.jp/kegg-bin/show_pathway?ko02020
	KEGG PATHWAY	ko02024	6	338	0.2011	0.755942	ZHLZ.comp43654_c0_seq1|ZHLZ.comp44087_c0_seq2|ZHLZ.comp44600_c1_seq1|ZHLZ.comp44600_c3_seq1|ZHLZ.comp44896_c0_seq1|ZHLZ.comp47058_c0_seq1|ZHLZ.comp48411_c1_seq1|ZHLZ.comp48489_c0_seq1|ZHLZ.comp50138_c0_seq1|ZHLZ.comp53141_c0_seq1|ZHLZ.comp53344_c0_seq1|ZHLZ.comp53528_c0_seq1|ZHLZ.comp57217_c0_seq1|ZHLZ.comp81686_c0_seq1|	http://www.genome.jp/kegg-bin/show_pathway?ko02024
	KEGG PATHWAY	ko02025	1	98	0.3753	0.930679	ZHLZ.comp57217_c0_seq1|	http://www.genome.jp/kegg-bin/show_pathway?ko02025
	KEGG PATHWAY	ko03008	4	83	0.3265	0.930679	ZHLZ.comp43453_c1_seq1|ZHLZ.comp48476_c0_seq1|ZHLZ.comp54301_c1_seq1|ZHLZ.comp57250_c0_seq1|	http://www.genome.jp/kegg-bin/show_pathway?ko03008
	KEGG PATHWAY	ko03010	17	144	2.825e-06	0.000110175	ZHLZ.comp26916_c0_seq1|ZHLZ.comp27349_c0_seq1|ZHLZ.comp35306_c0_seq1|ZHLZ.comp35546_c0_seq1|ZHLZ.comp35616_c0_seq1|ZHLZ.comp35728_c0_seq3|ZHLZ.comp36077_c0_seq1|ZHLZ.comp36099_c0_seq1|ZHLZ.comp36126_c0_seq1|ZHLZ.comp44819_c1_seq1|ZHLZ.comp47342_c0_seq1|ZHLZ.comp47691_c0_seq3|ZHLZ.comp48382_c0_seq1|ZHLZ.comp48642_c0_seq3|ZHLZ.comp54204_c0_seq1|ZHLZ.comp55601_c1_seq1|ZHLZ.comp60515_c0_seq1|	http://www.genome.jp/kegg-bin/show_pathway?ko03010
	KEGG PATHWAY	ko03013	2	142	0.3319	0.930679	ZHLZ.comp48028_c0_seq1|ZHLZ.comp56586_c0_seq1|	http://www.genome.jp/kegg-bin/show_pathway?ko03013
	KEGG PATHWAY	ko03015	3	60	0.4337	0.967565	ZHLZ.comp43494_c0_seq1|ZHLZ.comp44715_c1_seq1|ZHLZ.comp59946_c0_seq1|	http://www.genome.jp/kegg-bin/show_pathway?ko03015
	KEGG PATHWAY	ko03018	4	79	0.3098	0.930679	ZHLZ.comp26798_c0_seq1|ZHLZ.comp26910_c0_seq1|ZHLZ.comp43590_c1_seq1|ZHLZ.comp44376_c0_seq1|ZHLZ.comp50439_c0_seq1|	http://www.genome.jp/kegg-bin/show_pathway?ko03018
	KEGG PATHWAY	ko03040	6	123	0.2832	0.901616	ZHLZ.comp26798_c0_seq1|ZHLZ.comp44376_c0_seq1|ZHLZ.comp44479_c0_seq1|ZHLZ.comp45931_c1_seq1|ZHLZ.comp45931_c2_seq1|ZHLZ.comp45931_c3_seq1|ZHLZ.comp48476_c0_seq1|ZHLZ.comp59234_c0_seq4|	http://www.genome.jp/kegg-bin/show_pathway?ko03040
	KEGG PATHWAY	ko03060	3	40	0.1245	0.588545	ZHLZ.comp27082_c0_seq1|ZHLZ.comp48212_c0_seq1|ZHLZ.comp59789_c0_seq1|	http://www.genome.jp/kegg-bin/show_pathway?ko03060
	KEGG PATHWAY	ko03070	1	76	0.732	0.9999	ZHLZ.comp27082_c0_seq1|	http://www.genome.jp/kegg-bin/show_pathway?ko03070
	KEGG PATHWAY	ko03320	3	67	0.4627	0.967565	ZHLZ.comp43654_c0_seq1|ZHLZ.comp44087_c0_seq2|ZHLZ.comp50138_c0_seq1|ZHLZ.comp58913_c0_seq1|ZHLZ.comp59631_c0_seq1|	http://www.genome.jp/kegg-bin/show_pathway?ko03320
	KEGG PATHWAY	ko03420	1	48	0.9999	0.9999	ZHLZ.comp47902_c0_seq1|	http://www.genome.jp/kegg-bin/show_pathway?ko03420
	KEGG PATHWAY	ko03440	1	73	0.7287	0.9999	ZHLZ.comp56959_c0_seq20|	http://www.genome.jp/kegg-bin/show_pathway?ko03440
	KEGG PATHWAY	ko03460	1	55	0.9999	0.9999	ZHLZ.comp56959_c0_seq20|	http://www.genome.jp/kegg-bin/show_pathway?ko03460
	KEGG PATHWAY	ko04010	2	199	0.09742	0.492658	ZHLZ.comp45931_c1_seq1|ZHLZ.comp45931_c2_seq1|ZHLZ.comp45931_c3_seq1|ZHLZ.comp55656_c0_seq1|	http://www.genome.jp/kegg-bin/show_pathway?ko04010
	KEGG PATHWAY	ko04011	2	91	0.9999	0.9999	ZHLZ.comp29168_c0_seq1|ZHLZ.comp59640_c0_seq1|	http://www.genome.jp/kegg-bin/show_pathway?ko04011
	KEGG PATHWAY	ko04012	1	73	0.7287	0.9999	ZHLZ.comp55656_c0_seq1|	http://www.genome.jp/kegg-bin/show_pathway?ko04012
	KEGG PATHWAY	ko04013	3	85	0.7468	0.9999	ZHLZ.comp47709_c0_seq1|ZHLZ.comp55656_c0_seq1|ZHLZ.comp62979_c0_seq1|	http://www.genome.jp/kegg-bin/show_pathway?ko04013
	KEGG PATHWAY	ko04014	2	175	0.1825	0.740711	ZHLZ.comp44152_c0_seq1|ZHLZ.comp55656_c0_seq1|ZHLZ.comp56130_c0_seq1|	http://www.genome.jp/kegg-bin/show_pathway?ko04014
	KEGG PATHWAY	ko04015	3	162	0.494	0.967565	ZHLZ.comp44152_c0_seq1|ZHLZ.comp55656_c0_seq1|ZHLZ.comp56130_c0_seq1|ZHLZ.comp62979_c0_seq1|	http://www.genome.jp/kegg-bin/show_pathway?ko04015
	KEGG PATHWAY	ko04016	13	55	1.054e-08	8.2212e-07	ZHLZ.comp34739_c0_seq1|ZHLZ.comp35076_c0_seq1|ZHLZ.comp35454_c0_seq1|ZHLZ.comp35860_c0_seq1|ZHLZ.comp37110_c1_seq1|ZHLZ.comp44152_c0_seq1|ZHLZ.comp48606_c0_seq1|ZHLZ.comp48606_c0_seq2|ZHLZ.comp48984_c0_seq1|ZHLZ.comp49930_c0_seq1|ZHLZ.comp49947_c1_seq1|ZHLZ.comp50012_c0_seq2|ZHLZ.comp52555_c0_seq1|ZHLZ.comp53035_c0_seq1|ZHLZ.comp53308_c0_seq1|ZHLZ.comp54447_c0_seq1|ZHLZ.comp54686_c1_seq1|ZHLZ.com…	http://www.genome.jp/kegg-bin/show_pathway?ko04016
	KEGG PATHWAY	ko04020	2	153	0.3378	0.930679	ZHLZ.comp44152_c0_seq1|ZHLZ.comp54434_c1_seq1|ZHLZ.comp56130_c0_seq1|	http://www.genome.jp/kegg-bin/show_pathway?ko04020
	KEGG PATHWAY	ko04022	3	132	0.8009	0.9999	ZHLZ.comp44152_c0_seq1|ZHLZ.comp44715_c1_seq1|ZHLZ.comp55656_c0_seq1|ZHLZ.comp56130_c0_seq1|	http://www.genome.jp/kegg-bin/show_pathway?ko04022
	KEGG PATHWAY	ko04024	4	187	0.6669	0.9999	ZHLZ.comp44152_c0_seq1|ZHLZ.comp44715_c1_seq1|ZHLZ.comp55656_c0_seq1|ZHLZ.comp56130_c0_seq1|ZHLZ.comp58913_c0_seq1|	http://www.genome.jp/kegg-bin/show_pathway?ko04024
	KEGG PATHWAY	ko04062	1	159	0.0979	0.492658	ZHLZ.comp55656_c0_seq1|	http://www.genome.jp/kegg-bin/show_pathway?ko04062
	KEGG PATHWAY	ko04064	2	93	0.9999	0.9999	ZHLZ.comp43453_c1_seq1|ZHLZ.comp54220_c0_seq2|	http://www.genome.jp/kegg-bin/show_pathway?ko04064
	KEGG PATHWAY	ko04066	5	87	0.196	0.745756	ZHLZ.comp26776_c0_seq1|ZHLZ.comp27189_c0_seq1|ZHLZ.comp46348_c1_seq1|ZHLZ.comp47902_c0_seq1|ZHLZ.comp54484_c2_seq1|ZHLZ.comp55656_c0_seq1|	http://www.genome.jp/kegg-bin/show_pathway?ko04066
	KEGG PATHWAY	ko04068	3	107	0.9999	0.9999	ZHLZ.comp35701_c0_seq1|ZHLZ.comp47926_c0_seq1|ZHLZ.comp52586_c0_seq1|ZHLZ.comp52586_c1_seq1|ZHLZ.comp55656_c0_seq1|	http://www.genome.jp/kegg-bin/show_pathway?ko04068
	KEGG PATHWAY	ko04070	6	85	0.04765	0.330373	ZHLZ.comp29168_c0_seq1|ZHLZ.comp44152_c0_seq1|ZHLZ.comp47185_c0_seq1|ZHLZ.comp49427_c0_seq1|ZHLZ.comp51215_c0_seq1|ZHLZ.comp55790_c0_seq1|ZHLZ.comp56130_c0_seq1|	http://www.genome.jp/kegg-bin/show_pathway?ko04070
	KEGG PATHWAY	ko04071	3	95	0.7681	0.9999	ZHLZ.comp54434_c1_seq1|ZHLZ.comp55656_c0_seq1|ZHLZ.comp59946_c0_seq1|	http://www.genome.jp/kegg-bin/show_pathway?ko04071
	KEGG PATHWAY	ko04072	5	116	0.41	0.961805	ZHLZ.comp29168_c0_seq1|ZHLZ.comp45683_c0_seq1|ZHLZ.comp45683_c1_seq1|ZHLZ.comp46207_c0_seq1|ZHLZ.comp46207_c0_seq4|ZHLZ.comp54434_c1_seq1|ZHLZ.comp55656_c0_seq1|ZHLZ.comp55790_c0_seq1|	http://www.genome.jp/kegg-bin/show_pathway?ko04072
	KEGG PATHWAY	ko04075	20	58	4.541e-16	1.41679e-13	ZHLZ.comp26919_c0_seq1|ZHLZ.comp27096_c0_seq1|ZHLZ.comp273759_c0_seq1|ZHLZ.comp30517_c0_seq1|ZHLZ.comp34739_c0_seq1|ZHLZ.comp34762_c0_seq1|ZHLZ.comp35076_c0_seq1|ZHLZ.comp35187_c0_seq1|ZHLZ.comp35187_c1_seq1|ZHLZ.comp35187_c2_seq1|ZHLZ.comp35281_c0_seq1|ZHLZ.comp35860_c0_seq1|ZHLZ.comp37110_c1_seq1|ZHLZ.comp37656_c0_seq1|ZHLZ.comp40423_c0_seq1|ZHLZ.comp45259_c0_seq1|ZHLZ.comp46972_c0_seq1|ZHLZ.co…	http://www.genome.jp/kegg-bin/show_pathway?ko04075
	KEGG PATHWAY	ko04110	4	110	0.5828	0.9999	ZHLZ.comp47902_c0_seq1|ZHLZ.comp47926_c0_seq1|ZHLZ.comp52690_c0_seq1|ZHLZ.comp59640_c0_seq1|	http://www.genome.jp/kegg-bin/show_pathway?ko04110
	KEGG PATHWAY	ko04111	2	125	0.5956	0.9999	ZHLZ.comp47902_c0_seq1|ZHLZ.comp52690_c0_seq1|	http://www.genome.jp/kegg-bin/show_pathway?ko04111
	KEGG PATHWAY	ko04112	2	33	0.2696	0.8762	ZHLZ.comp26781_c0_seq1|ZHLZ.comp45526_c0_seq1|ZHLZ.comp48888_c0_seq1|ZHLZ.comp51822_c0_seq1|ZHLZ.comp52228_c0_seq1|ZHLZ.comp59928_c0_seq1|	http://www.genome.jp/kegg-bin/show_pathway?ko04112
	KEGG PATHWAY	ko04113	2	103	0.7729	0.9999	ZHLZ.comp44715_c1_seq1|ZHLZ.comp59946_c0_seq1|	http://www.genome.jp/kegg-bin/show_pathway?ko04113
	KEGG PATHWAY	ko04114	8	83	0.00416	0.04992	ZHLZ.comp44152_c0_seq1|ZHLZ.comp44715_c1_seq1|ZHLZ.comp47902_c0_seq1|ZHLZ.comp47926_c0_seq1|ZHLZ.comp52690_c0_seq1|ZHLZ.comp55656_c0_seq1|ZHLZ.comp56130_c0_seq1|ZHLZ.comp59640_c0_seq1|ZHLZ.comp59946_c0_seq1|	http://www.genome.jp/kegg-bin/show_pathway?ko04114
	KEGG PATHWAY	ko04115	3	63	0.4453	0.967565	ZHLZ.comp35493_c0_seq1|ZHLZ.comp47709_c0_seq1|ZHLZ.comp47926_c0_seq1|	http://www.genome.jp/kegg-bin/show_pathway?ko04115
	KEGG PATHWAY	ko04120	7	126	0.1144	0.54912	ZHLZ.comp34721_c0_seq1|ZHLZ.comp35379_c0_seq1|ZHLZ.comp43556_c0_seq1|ZHLZ.comp47709_c0_seq1|ZHLZ.comp47902_c0_seq1|ZHLZ.comp52690_c0_seq1|ZHLZ.comp53194_c0_seq2|	http://www.genome.jp/kegg-bin/show_pathway?ko04120
	KEGG PATHWAY	ko04137	2	58	0.6988	0.9999	ZHLZ.comp27060_c0_seq1|ZHLZ.comp43453_c1_seq1|	http://www.genome.jp/kegg-bin/show_pathway?ko04137
	KEGG PATHWAY	ko04139	2	36	0.304	0.929882	ZHLZ.comp29168_c0_seq1|ZHLZ.comp43453_c1_seq1|	http://www.genome.jp/kegg-bin/show_pathway?ko04139
	KEGG PATHWAY	ko04140	3	105	0.9999	0.9999	ZHLZ.comp35701_c0_seq1|ZHLZ.comp52586_c0_seq1|ZHLZ.comp52586_c1_seq1|ZHLZ.comp54154_c0_seq1|ZHLZ.comp55656_c0_seq1|	http://www.genome.jp/kegg-bin/show_pathway?ko04140
	KEGG PATHWAY	ko04141	12	147	0.00217	0.0307745	ZHLZ.comp27731_c0_seq1|ZHLZ.comp45792_c0_seq1|ZHLZ.comp45931_c1_seq1|ZHLZ.comp45931_c2_seq1|ZHLZ.comp45931_c3_seq1|ZHLZ.comp46905_c0_seq1|ZHLZ.comp47898_c0_seq1|ZHLZ.comp47898_c1_seq1|ZHLZ.comp47898_c2_seq1|ZHLZ.comp47902_c0_seq1|ZHLZ.comp48147_c1_seq1|ZHLZ.comp48653_c0_seq1|ZHLZ.comp48982_c0_seq1|ZHLZ.comp48982_c1_seq1|ZHLZ.comp48982_c2_seq1|ZHLZ.comp50286_c0_seq1|ZHLZ.comp52163_c0_seq1|ZHLZ.com…	http://www.genome.jp/kegg-bin/show_pathway?ko04141
	KEGG PATHWAY	ko04142	9	108	0.006411	0.0645236	ZHLZ.comp26993_c0_seq1|ZHLZ.comp27011_c0_seq1|ZHLZ.comp27103_c0_seq1|ZHLZ.comp35684_c0_seq1|ZHLZ.comp37137_c0_seq1|ZHLZ.comp47672_c0_seq1|ZHLZ.comp49261_c3_seq1|ZHLZ.comp54154_c0_seq1|ZHLZ.comp55877_c0_seq1|ZHLZ.comp56700_c0_seq2|ZHLZ.comp59777_c0_seq1|ZHLZ.comp60684_c0_seq1|	http://www.genome.jp/kegg-bin/show_pathway?ko04142
	KEGG PATHWAY	ko04144	7	185	0.5183	0.967565	ZHLZ.comp29168_c0_seq1|ZHLZ.comp45683_c0_seq1|ZHLZ.comp45683_c1_seq1|ZHLZ.comp45931_c1_seq1|ZHLZ.comp45931_c2_seq1|ZHLZ.comp45931_c3_seq1|ZHLZ.comp46207_c0_seq1|ZHLZ.comp46207_c0_seq4|ZHLZ.comp49261_c3_seq1|ZHLZ.comp50471_c0_seq1|ZHLZ.comp54249_c1_seq1|ZHLZ.comp56700_c0_seq2|ZHLZ.comp59813_c0_seq1|ZHLZ.comp60982_c0_seq1|	http://www.genome.jp/kegg-bin/show_pathway?ko04144
	KEGG PATHWAY	ko04145	6	97	0.1269	0.590937	ZHLZ.comp48147_c1_seq1|ZHLZ.comp49427_c0_seq1|ZHLZ.comp52640_c0_seq1|ZHLZ.comp52640_c0_seq5|ZHLZ.comp55802_c0_seq14|ZHLZ.comp58172_c1_seq3|ZHLZ.comp59789_c0_seq1|ZHLZ.comp59849_c0_seq1|	http://www.genome.jp/kegg-bin/show_pathway?ko04145
	KEGG PATHWAY	ko04146	7	73	0.007325	0.0692545	ZHLZ.comp35508_c0_seq1|ZHLZ.comp35837_c0_seq1|ZHLZ.comp35881_c0_seq1|ZHLZ.comp43654_c0_seq1|ZHLZ.comp44087_c0_seq2|ZHLZ.comp50138_c0_seq1|ZHLZ.comp57069_c0_seq4|ZHLZ.comp58913_c0_seq1|ZHLZ.comp59631_c0_seq1|	http://www.genome.jp/kegg-bin/show_pathway?ko04146
	KEGG PATHWAY	ko04150	3	118	0.9999	0.9999	ZHLZ.comp35701_c0_seq1|ZHLZ.comp52586_c0_seq1|ZHLZ.comp52586_c1_seq1|ZHLZ.comp55656_c0_seq1|ZHLZ.comp58172_c1_seq3|	http://www.genome.jp/kegg-bin/show_pathway?ko04150
	KEGG PATHWAY	ko04151	5	247	0.4554	0.967565	ZHLZ.comp35701_c0_seq1|ZHLZ.comp47926_c0_seq1|ZHLZ.comp52586_c0_seq1|ZHLZ.comp52586_c1_seq1|ZHLZ.comp55656_c0_seq1|ZHLZ.comp59640_c0_seq1|ZHLZ.comp59946_c0_seq1|	http://www.genome.jp/kegg-bin/show_pathway?ko04151
	KEGG PATHWAY	ko04152	5	108	0.39	0.936	ZHLZ.comp26910_c0_seq1|ZHLZ.comp35701_c0_seq1|ZHLZ.comp44518_c0_seq1|ZHLZ.comp47829_c1_seq1|ZHLZ.comp52586_c0_seq1|ZHLZ.comp52586_c1_seq1|ZHLZ.comp59946_c0_seq1|	http://www.genome.jp/kegg-bin/show_pathway?ko04152
	KEGG PATHWAY	ko04210	5	114	0.4044	0.955855	ZHLZ.comp35493_c0_seq1|ZHLZ.comp37137_c0_seq1|ZHLZ.comp52640_c0_seq1|ZHLZ.comp52640_c0_seq5|ZHLZ.comp54154_c0_seq1|ZHLZ.comp55656_c0_seq1|ZHLZ.comp55802_c0_seq14|	http://www.genome.jp/kegg-bin/show_pathway?ko04210
	KEGG PATHWAY	ko04211	1	76	0.732	0.9999	ZHLZ.comp35701_c0_seq1|ZHLZ.comp52586_c0_seq1|ZHLZ.comp52586_c1_seq1|	http://www.genome.jp/kegg-bin/show_pathway?ko04211
	KEGG PATHWAY	ko04212	3	68	0.4673	0.967565	ZHLZ.comp26781_c0_seq1|ZHLZ.comp43786_c0_seq1|ZHLZ.comp45526_c0_seq1|ZHLZ.comp48888_c0_seq1|ZHLZ.comp51822_c0_seq1|ZHLZ.comp57069_c0_seq4|ZHLZ.comp59928_c0_seq1|	http://www.genome.jp/kegg-bin/show_pathway?ko04212
	KEGG PATHWAY	ko04213	3	61	0.4374	0.967565	ZHLZ.comp35508_c0_seq1|ZHLZ.comp35701_c0_seq1|ZHLZ.comp45931_c1_seq1|ZHLZ.comp45931_c2_seq1|ZHLZ.comp45931_c3_seq1|ZHLZ.comp52586_c0_seq1|ZHLZ.comp52586_c1_seq1|	http://www.genome.jp/kegg-bin/show_pathway?ko04213
	KEGG PATHWAY	ko04214	2	58	0.6988	0.9999	ZHLZ.comp27967_c0_seq1|ZHLZ.comp35493_c0_seq1|ZHLZ.comp35564_c0_seq1|	http://www.genome.jp/kegg-bin/show_pathway?ko04214
	KEGG PATHWAY	ko04215	1	40	0.9999	0.9999	ZHLZ.comp35493_c0_seq1|	http://www.genome.jp/kegg-bin/show_pathway?ko04215
	KEGG PATHWAY	ko04216	2	65	0.9999	0.9999	ZHLZ.comp43654_c0_seq1|ZHLZ.comp44087_c0_seq2|ZHLZ.comp50138_c0_seq1|ZHLZ.comp52763_c0_seq1|	http://www.genome.jp/kegg-bin/show_pathway?ko04216
	KEGG PATHWAY	ko04217	3	107	0.9999	0.9999	ZHLZ.comp27001_c0_seq1|ZHLZ.comp35557_c0_seq1|ZHLZ.comp36181_c0_seq1|ZHLZ.comp52763_c0_seq1|ZHLZ.comp56694_c2_seq4|	http://www.genome.jp/kegg-bin/show_pathway?ko04217
	KEGG PATHWAY	ko04218	4	122	0.7906	0.9999	ZHLZ.comp44152_c0_seq1|ZHLZ.comp44715_c1_seq1|ZHLZ.comp47926_c0_seq1|ZHLZ.comp55656_c0_seq1|ZHLZ.comp56130_c0_seq1|	http://www.genome.jp/kegg-bin/show_pathway?ko04218
	KEGG PATHWAY	ko04260	2	65	0.9999	0.9999	ZHLZ.comp35350_c0_seq1|ZHLZ.comp49234_c0_seq1|	http://www.genome.jp/kegg-bin/show_pathway?ko04260
	KEGG PATHWAY	ko04261	3	104	0.9999	0.9999	ZHLZ.comp44152_c0_seq1|ZHLZ.comp44715_c1_seq1|ZHLZ.comp56130_c0_seq1|ZHLZ.comp59946_c0_seq1|	http://www.genome.jp/kegg-bin/show_pathway?ko04261
	KEGG PATHWAY	ko04270	3	113	0.9999	0.9999	ZHLZ.comp44152_c0_seq1|ZHLZ.comp44715_c1_seq1|ZHLZ.comp55656_c0_seq1|ZHLZ.comp56130_c0_seq1|	http://www.genome.jp/kegg-bin/show_pathway?ko04270
	KEGG PATHWAY	ko04310	5	105	0.2597	0.871252	ZHLZ.comp43453_c1_seq1|ZHLZ.comp47709_c0_seq1|ZHLZ.comp47902_c0_seq1|ZHLZ.comp52690_c0_seq1|ZHLZ.comp56113_c0_seq1|	http://www.genome.jp/kegg-bin/show_pathway?ko04310
	KEGG PATHWAY	ko04320	1	28	0.5826	0.9999	ZHLZ.comp55656_c0_seq1|	http://www.genome.jp/kegg-bin/show_pathway?ko04320
	KEGG PATHWAY	ko04341	2	24	0.1676	0.719737	ZHLZ.comp47902_c0_seq1|ZHLZ.comp52690_c0_seq1|	http://www.genome.jp/kegg-bin/show_pathway?ko04341
	KEGG PATHWAY	ko04350	2	71	0.9999	0.9999	ZHLZ.comp47902_c0_seq1|ZHLZ.comp52690_c0_seq1|	http://www.genome.jp/kegg-bin/show_pathway?ko04350
	KEGG PATHWAY	ko04360	1	124	0.1898	0.740711	ZHLZ.comp24911_c0_seq1|ZHLZ.comp34083_c0_seq1|ZHLZ.comp49890_c0_seq3|ZHLZ.comp60464_c0_seq1|	http://www.genome.jp/kegg-bin/show_pathway?ko04360
	KEGG PATHWAY	ko04370	2	46	0.6527	0.9999	ZHLZ.comp54434_c1_seq1|ZHLZ.comp55656_c0_seq1|	http://www.genome.jp/kegg-bin/show_pathway?ko04370
	KEGG PATHWAY	ko04371	4	112	0.7791	0.9999	ZHLZ.comp35701_c0_seq1|ZHLZ.comp44152_c0_seq1|ZHLZ.comp52586_c0_seq1|ZHLZ.comp52586_c1_seq1|ZHLZ.comp54434_c1_seq1|ZHLZ.comp55656_c0_seq1|ZHLZ.comp56130_c0_seq1|	http://www.genome.jp/kegg-bin/show_pathway?ko04371
	KEGG PATHWAY	ko04380	2	103	0.7729	0.9999	ZHLZ.comp27103_c0_seq1|ZHLZ.comp55656_c0_seq1|	http://www.genome.jp/kegg-bin/show_pathway?ko04380
	KEGG PATHWAY	ko04390	2	112	0.7788	0.9999	ZHLZ.comp44715_c1_seq1|ZHLZ.comp59640_c0_seq1|	http://www.genome.jp/kegg-bin/show_pathway?ko04390
	KEGG PATHWAY	ko04391	1	53	0.9999	0.9999	ZHLZ.comp59640_c0_seq1|	http://www.genome.jp/kegg-bin/show_pathway?ko04391
	KEGG PATHWAY	ko04510	2	151	0.3359	0.930679	ZHLZ.comp44715_c1_seq1|ZHLZ.comp55656_c0_seq1|	http://www.genome.jp/kegg-bin/show_pathway?ko04510
	KEGG PATHWAY	ko04520	1	61	0.9999	0.9999	ZHLZ.comp43453_c1_seq1|	http://www.genome.jp/kegg-bin/show_pathway?ko04520
	KEGG PATHWAY	ko04530	3	103	0.9999	0.9999	CL531Contig1|ZHLZ.comp35701_c0_seq1|ZHLZ.comp52586_c0_seq1|ZHLZ.comp52586_c1_seq1|ZHLZ.comp52640_c0_seq1|ZHLZ.comp52640_c0_seq5|ZHLZ.comp55802_c0_seq14|	http://www.genome.jp/kegg-bin/show_pathway?ko04530
	KEGG PATHWAY	ko04540	2	71	0.9999	0.9999	ZHLZ.comp52640_c0_seq1|ZHLZ.comp52640_c0_seq5|ZHLZ.comp55656_c0_seq1|ZHLZ.comp55802_c0_seq14|	http://www.genome.jp/kegg-bin/show_pathway?ko04540
	KEGG PATHWAY	ko04550	1	109	0.2668	0.8762	ZHLZ.comp55656_c0_seq1|	http://www.genome.jp/kegg-bin/show_pathway?ko04550
	KEGG PATHWAY	ko04611	1	104	0.3816	0.930679	ZHLZ.comp44715_c1_seq1|	http://www.genome.jp/kegg-bin/show_pathway?ko04611
	KEGG PATHWAY	ko04612	6	42	0.00174	0.0258514	ZHLZ.comp26993_c0_seq1|ZHLZ.comp32988_c0_seq1|ZHLZ.comp32988_c1_seq1|ZHLZ.comp45931_c1_seq1|ZHLZ.comp45931_c2_seq1|ZHLZ.comp45931_c3_seq1|ZHLZ.comp48147_c1_seq1|ZHLZ.comp49777_c0_seq1|ZHLZ.comp54154_c0_seq1|ZHLZ.comp59849_c0_seq1|	http://www.genome.jp/kegg-bin/show_pathway?ko04612
	KEGG PATHWAY	ko04620	2	77	0.9999	0.9999	ZHLZ.comp54220_c0_seq2|ZHLZ.comp55656_c0_seq1|	http://www.genome.jp/kegg-bin/show_pathway?ko04620
	KEGG PATHWAY	ko04621	2	152	0.3368	0.930679	ZHLZ.comp43315_c0_seq1|ZHLZ.comp51319_c0_seq1|ZHLZ.comp54154_c0_seq1|ZHLZ.comp54786_c1_seq1|	http://www.genome.jp/kegg-bin/show_pathway?ko04621
	KEGG PATHWAY	ko04624	2	49	0.6631	0.9999	ZHLZ.comp54220_c0_seq2|ZHLZ.comp60915_c0_seq1|	http://www.genome.jp/kegg-bin/show_pathway?ko04624
	KEGG PATHWAY	ko04626	14	84	3.145e-07	1.40177e-05	ZHLZ.comp27433_c0_seq1|ZHLZ.comp35089_c0_seq1|ZHLZ.comp36677_c0_seq1|ZHLZ.comp37110_c1_seq1|ZHLZ.comp44152_c0_seq1|ZHLZ.comp47722_c0_seq1|ZHLZ.comp48984_c0_seq1|ZHLZ.comp53768_c0_seq1|ZHLZ.comp53768_c0_seq2|ZHLZ.comp54447_c0_seq1|ZHLZ.comp54447_c0_seq4|ZHLZ.comp54686_c1_seq1|ZHLZ.comp55656_c0_seq1|ZHLZ.comp56130_c0_seq1|ZHLZ.comp56670_c0_seq1|ZHLZ.comp58384_c0_seq1|ZHLZ.comp58881_c4_seq1|ZHLZ.com…	http://www.genome.jp/kegg-bin/show_pathway?ko04626
	KEGG PATHWAY	ko04650	1	86	0.5252	0.967565	ZHLZ.comp55656_c0_seq1|	http://www.genome.jp/kegg-bin/show_pathway?ko04650
	KEGG PATHWAY	ko04657	1	82	0.5224	0.967565	ZHLZ.comp57443_c0_seq2|	http://www.genome.jp/kegg-bin/show_pathway?ko04657
	KEGG PATHWAY	ko04660	1	90	0.5303	0.967565	ZHLZ.comp55656_c0_seq1|	http://www.genome.jp/kegg-bin/show_pathway?ko04660
	KEGG PATHWAY	ko04662	1	62	0.9999	0.9999	ZHLZ.comp55656_c0_seq1|	http://www.genome.jp/kegg-bin/show_pathway?ko04662
	KEGG PATHWAY	ko04664	1	59	0.9999	0.9999	ZHLZ.comp55656_c0_seq1|	http://www.genome.jp/kegg-bin/show_pathway?ko04664
	KEGG PATHWAY	ko04666	5	67	0.05564	0.354279	ZHLZ.comp24911_c0_seq1|ZHLZ.comp29168_c0_seq1|ZHLZ.comp34083_c0_seq1|ZHLZ.comp49890_c0_seq3|ZHLZ.comp54434_c1_seq1|ZHLZ.comp55656_c0_seq1|ZHLZ.comp60464_c0_seq1|ZHLZ.comp60982_c0_seq1|	http://www.genome.jp/kegg-bin/show_pathway?ko04666
	KEGG PATHWAY	ko04668	1	89	0.5288	0.967565	ZHLZ.comp55656_c0_seq1|	http://www.genome.jp/kegg-bin/show_pathway?ko04668
	KEGG PATHWAY	ko04710	3	27	0.0492	0.333704	ZHLZ.comp35701_c0_seq1|ZHLZ.comp47902_c0_seq1|ZHLZ.comp52586_c0_seq1|ZHLZ.comp52586_c1_seq1|ZHLZ.comp52690_c0_seq1|	http://www.genome.jp/kegg-bin/show_pathway?ko04710
	KEGG PATHWAY	ko04712	5	28	0.001512	0.0235872	ZHLZ.comp27950_c0_seq1|ZHLZ.comp35281_c0_seq1|ZHLZ.comp39786_c0_seq1|ZHLZ.comp43453_c1_seq1|ZHLZ.comp48479_c0_seq1|	http://www.genome.jp/kegg-bin/show_pathway?ko04712
	KEGG PATHWAY	ko04713	1	90	0.5303	0.967565	ZHLZ.comp44152_c0_seq1|ZHLZ.comp56130_c0_seq1|	http://www.genome.jp/kegg-bin/show_pathway?ko04713
	KEGG PATHWAY	ko04720	3	51	0.2068	0.759812	ZHLZ.comp44152_c0_seq1|ZHLZ.comp44715_c1_seq1|ZHLZ.comp55656_c0_seq1|ZHLZ.comp56130_c0_seq1|	http://www.genome.jp/kegg-bin/show_pathway?ko04720
	KEGG PATHWAY	ko04721	3	53	0.2229	0.801876	ZHLZ.comp37256_c0_seq1|ZHLZ.comp49261_c3_seq1|ZHLZ.comp56700_c0_seq2|ZHLZ.comp58172_c1_seq3|ZHLZ.comp61057_c0_seq1|	http://www.genome.jp/kegg-bin/show_pathway?ko04721
	KEGG PATHWAY	ko04722	4	96	0.5427	0.984433	ZHLZ.comp44152_c0_seq1|ZHLZ.comp54220_c0_seq2|ZHLZ.comp55656_c0_seq1|ZHLZ.comp56130_c0_seq1|ZHLZ.comp59640_c0_seq1|	http://www.genome.jp/kegg-bin/show_pathway?ko04722
	KEGG PATHWAY	ko04723	6	139	0.3269	0.930679	ZHLZ.comp35641_c0_seq1|ZHLZ.comp37256_c0_seq1|ZHLZ.comp52638_c2_seq6|ZHLZ.comp59549_c0_seq1|ZHLZ.comp59623_c0_seq1|ZHLZ.comp59856_c0_seq1|ZHLZ.comp61057_c0_seq1|	http://www.genome.jp/kegg-bin/show_pathway?ko04723
	KEGG PATHWAY	ko04724	2	94	0.9999	0.9999	ZHLZ.comp46658_c0_seq1|ZHLZ.comp56694_c2_seq4|	http://www.genome.jp/kegg-bin/show_pathway?ko04724
	KEGG PATHWAY	ko04725	1	102	0.379	0.930679	ZHLZ.comp55656_c0_seq1|	http://www.genome.jp/kegg-bin/show_pathway?ko04725
	KEGG PATHWAY	ko04726	1	127	0.191	0.740711	ZHLZ.comp55656_c0_seq1|	http://www.genome.jp/kegg-bin/show_pathway?ko04726
	KEGG PATHWAY	ko04727	4	75	0.2953	0.921336	ZHLZ.comp37256_c0_seq1|ZHLZ.comp46658_c0_seq1|ZHLZ.comp48489_c0_seq1|ZHLZ.comp56694_c2_seq4|ZHLZ.comp61057_c0_seq1|	http://www.genome.jp/kegg-bin/show_pathway?ko04727
	KEGG PATHWAY	ko04728	3	96	0.7705	0.9999	ZHLZ.comp44152_c0_seq1|ZHLZ.comp44715_c1_seq1|ZHLZ.comp56130_c0_seq1|ZHLZ.comp59946_c0_seq1|	http://www.genome.jp/kegg-bin/show_pathway?ko04728
	KEGG PATHWAY	ko04730	1	55	0.9999	0.9999	ZHLZ.comp55656_c0_seq1|	http://www.genome.jp/kegg-bin/show_pathway?ko04730
	KEGG PATHWAY	ko04740	1	34	0.9999	0.9999	ZHLZ.comp44152_c0_seq1|ZHLZ.comp56130_c0_seq1|	http://www.genome.jp/kegg-bin/show_pathway?ko04740
	KEGG PATHWAY	ko04744	1	27	0.5693	0.9999	ZHLZ.comp44152_c0_seq1|ZHLZ.comp56130_c0_seq1|	http://www.genome.jp/kegg-bin/show_pathway?ko04744
	KEGG PATHWAY	ko04745	1	30	0.6078	0.9999	ZHLZ.comp44152_c0_seq1|ZHLZ.comp56130_c0_seq1|	http://www.genome.jp/kegg-bin/show_pathway?ko04745
	KEGG PATHWAY	ko04750	2	104	0.7733	0.9999	ZHLZ.comp44152_c0_seq1|ZHLZ.comp44715_c1_seq1|ZHLZ.comp56130_c0_seq1|	http://www.genome.jp/kegg-bin/show_pathway?ko04750
	KEGG PATHWAY	ko04810	7	158	0.3465	0.930679	ZHLZ.comp24911_c0_seq1|ZHLZ.comp29168_c0_seq1|ZHLZ.comp34083_c0_seq1|ZHLZ.comp44715_c1_seq1|ZHLZ.comp49427_c0_seq1|ZHLZ.comp49890_c0_seq3|ZHLZ.comp55656_c0_seq1|ZHLZ.comp60464_c0_seq1|ZHLZ.comp60982_c0_seq1|ZHLZ.comp62979_c0_seq1|	http://www.genome.jp/kegg-bin/show_pathway?ko04810
	KEGG PATHWAY	ko04910	5	91	0.207	0.759812	ZHLZ.comp35701_c0_seq1|ZHLZ.comp44152_c0_seq1|ZHLZ.comp44715_c1_seq1|ZHLZ.comp48338_c0_seq1|ZHLZ.comp52586_c0_seq1|ZHLZ.comp52586_c1_seq1|ZHLZ.comp55656_c0_seq1|ZHLZ.comp56130_c0_seq1|	http://www.genome.jp/kegg-bin/show_pathway?ko04910
	KEGG PATHWAY	ko04912	2	70	0.9999	0.9999	ZHLZ.comp44152_c0_seq1|ZHLZ.comp55656_c0_seq1|ZHLZ.comp56130_c0_seq1|	http://www.genome.jp/kegg-bin/show_pathway?ko04912
	KEGG PATHWAY	ko04914	2	69	0.9999	0.9999	ZHLZ.comp47926_c0_seq1|ZHLZ.comp55656_c0_seq1|	http://www.genome.jp/kegg-bin/show_pathway?ko04914
	KEGG PATHWAY	ko04915	3	75	0.5024	0.967565	ZHLZ.comp44152_c0_seq1|ZHLZ.comp45931_c1_seq1|ZHLZ.comp45931_c2_seq1|ZHLZ.comp45931_c3_seq1|ZHLZ.comp55656_c0_seq1|ZHLZ.comp56130_c0_seq1|	http://www.genome.jp/kegg-bin/show_pathway?ko04915
	KEGG PATHWAY	ko04916	3	74	0.4971	0.967565	ZHLZ.comp44152_c0_seq1|ZHLZ.comp47117_c0_seq1|ZHLZ.comp52111_c0_seq1|ZHLZ.comp55656_c0_seq1|ZHLZ.comp56130_c0_seq1|	http://www.genome.jp/kegg-bin/show_pathway?ko04916
	KEGG PATHWAY	ko04917	1	69	0.7257	0.9999	ZHLZ.comp55656_c0_seq1|	http://www.genome.jp/kegg-bin/show_pathway?ko04917
	KEGG PATHWAY	ko04918	3	74	0.4971	0.967565	ZHLZ.comp26878_c0_seq1|ZHLZ.comp45103_c0_seq1|ZHLZ.comp48147_c1_seq1|	http://www.genome.jp/kegg-bin/show_pathway?ko04918
	KEGG PATHWAY	ko04919	2	99	0.7719	0.9999	ZHLZ.comp53141_c0_seq1|ZHLZ.comp53528_c0_seq1|ZHLZ.comp55656_c0_seq1|	http://www.genome.jp/kegg-bin/show_pathway?ko04919
	KEGG PATHWAY	ko04920	2	61	0.7115	0.9999	ZHLZ.comp35701_c0_seq1|ZHLZ.comp43654_c0_seq1|ZHLZ.comp44087_c0_seq2|ZHLZ.comp50138_c0_seq1|ZHLZ.comp52586_c0_seq1|ZHLZ.comp52586_c1_seq1|	http://www.genome.jp/kegg-bin/show_pathway?ko04920
	KEGG PATHWAY	ko04921	5	125	0.4394	0.967565	ZHLZ.comp35701_c0_seq1|ZHLZ.comp44152_c0_seq1|ZHLZ.comp44715_c1_seq1|ZHLZ.comp47829_c1_seq1|ZHLZ.comp52586_c0_seq1|ZHLZ.comp52586_c1_seq1|ZHLZ.comp55656_c0_seq1|ZHLZ.comp56130_c0_seq1|	http://www.genome.jp/kegg-bin/show_pathway?ko04921
	KEGG PATHWAY	ko04922	5	82	0.1089	0.530887	ZHLZ.comp27189_c0_seq1|ZHLZ.comp35701_c0_seq1|ZHLZ.comp44152_c0_seq1|ZHLZ.comp46348_c1_seq1|ZHLZ.comp52586_c0_seq1|ZHLZ.comp52586_c1_seq1|ZHLZ.comp52668_c0_seq1|ZHLZ.comp54484_c2_seq1|ZHLZ.comp56130_c0_seq1|	http://www.genome.jp/kegg-bin/show_pathway?ko04922
	KEGG PATHWAY	ko04923	1	60	0.9999	0.9999	ZHLZ.comp52638_c2_seq6|	http://www.genome.jp/kegg-bin/show_pathway?ko04923
	KEGG PATHWAY	ko04924	2	68	0.9999	0.9999	ZHLZ.comp44152_c0_seq1|ZHLZ.comp54154_c0_seq1|ZHLZ.comp56130_c0_seq1|	http://www.genome.jp/kegg-bin/show_pathway?ko04924
	KEGG PATHWAY	ko04925	1	83	0.5229	0.967565	ZHLZ.comp44152_c0_seq1|ZHLZ.comp56130_c0_seq1|	http://www.genome.jp/kegg-bin/show_pathway?ko04925
	KEGG PATHWAY	ko04926	1	103	0.3802	0.930679	ZHLZ.comp55656_c0_seq1|	http://www.genome.jp/kegg-bin/show_pathway?ko04926
	KEGG PATHWAY	ko04930	1	44	0.9999	0.9999	ZHLZ.comp52668_c0_seq1|	http://www.genome.jp/kegg-bin/show_pathway?ko04930
	KEGG PATHWAY	ko04931	3	94	0.7658	0.9999	ZHLZ.comp35701_c0_seq1|ZHLZ.comp44715_c1_seq1|ZHLZ.comp52586_c0_seq1|ZHLZ.comp52586_c1_seq1|ZHLZ.comp55986_c0_seq1|	http://www.genome.jp/kegg-bin/show_pathway?ko04931
	KEGG PATHWAY	ko04932	10	127	0.006233	0.0645236	ZHLZ.comp27213_c0_seq1|ZHLZ.comp35350_c0_seq1|ZHLZ.comp35493_c0_seq1|ZHLZ.comp35641_c0_seq1|ZHLZ.comp35701_c0_seq1|ZHLZ.comp49234_c0_seq1|ZHLZ.comp50733_c1_seq1|ZHLZ.comp52586_c0_seq1|ZHLZ.comp52586_c1_seq1|ZHLZ.comp59549_c0_seq1|ZHLZ.comp59623_c0_seq1|ZHLZ.comp59856_c0_seq1|	http://www.genome.jp/kegg-bin/show_pathway?ko04932
	KEGG PATHWAY	ko04940	1	29	0.5954	0.9999	ZHLZ.comp48489_c0_seq1|	http://www.genome.jp/kegg-bin/show_pathway?ko04940
	KEGG PATHWAY	ko04961	2	39	0.338	0.930679	ZHLZ.comp49261_c3_seq1|ZHLZ.comp50471_c0_seq1|ZHLZ.comp56700_c0_seq2|ZHLZ.comp59813_c0_seq1|	http://www.genome.jp/kegg-bin/show_pathway?ko04961
	KEGG PATHWAY	ko04962	2	36	0.304	0.929882	ZHLZ.comp46923_c0_seq1|ZHLZ.comp50471_c0_seq1|ZHLZ.comp59813_c0_seq1|	http://www.genome.jp/kegg-bin/show_pathway?ko04962
	KEGG PATHWAY	ko04966	1	26	0.5557	0.996428	ZHLZ.comp58172_c1_seq3|	http://www.genome.jp/kegg-bin/show_pathway?ko04966
	KEGG PATHWAY	ko04970	2	81	0.9999	0.9999	ZHLZ.comp26979_c0_seq1|ZHLZ.comp44152_c0_seq1|ZHLZ.comp56130_c0_seq1|	http://www.genome.jp/kegg-bin/show_pathway?ko04970
	KEGG PATHWAY	ko04971	1	64	0.9999	0.9999	ZHLZ.comp44152_c0_seq1|ZHLZ.comp56130_c0_seq1|	http://www.genome.jp/kegg-bin/show_pathway?ko04971
	KEGG PATHWAY	ko04972	1	83	0.5229	0.967565	ZHLZ.comp50471_c0_seq1|ZHLZ.comp59813_c0_seq1|	http://www.genome.jp/kegg-bin/show_pathway?ko04972
	KEGG PATHWAY	ko04973	1	49	0.9999	0.9999	ZHLZ.comp34958_c0_seq1|ZHLZ.comp52545_c0_seq1|	http://www.genome.jp/kegg-bin/show_pathway?ko04973
	KEGG PATHWAY	ko04974	1	104	0.3816	0.930679	ZHLZ.comp46658_c0_seq1|	http://www.genome.jp/kegg-bin/show_pathway?ko04974
	KEGG PATHWAY	ko04976	2	235	0.05235	0.340275	ZHLZ.comp44518_c0_seq1|ZHLZ.comp55992_c0_seq1|ZHLZ.comp58026_c0_seq1|ZHLZ.comp58288_c0_seq1|	http://www.genome.jp/kegg-bin/show_pathway?ko04976
	KEGG PATHWAY	ko04978	2	61	0.7115	0.9999	ZHLZ.comp48129_c0_seq1|ZHLZ.comp52763_c0_seq1|	http://www.genome.jp/kegg-bin/show_pathway?ko04978
	KEGG PATHWAY	ko05010	12	151	0.002708	0.0367346	ZHLZ.comp26776_c0_seq1|ZHLZ.comp27213_c0_seq1|ZHLZ.comp35350_c0_seq1|ZHLZ.comp35493_c0_seq1|ZHLZ.comp35641_c0_seq1|ZHLZ.comp44152_c0_seq1|ZHLZ.comp49234_c0_seq1|ZHLZ.comp50733_c1_seq1|ZHLZ.comp54988_c0_seq1|ZHLZ.comp56130_c0_seq1|ZHLZ.comp59549_c0_seq1|ZHLZ.comp59623_c0_seq1|ZHLZ.comp59856_c0_seq1|	http://www.genome.jp/kegg-bin/show_pathway?ko05010
	KEGG PATHWAY	ko05012	10	137	0.01037	0.09516	ZHLZ.comp27213_c0_seq1|ZHLZ.comp35350_c0_seq1|ZHLZ.comp35493_c0_seq1|ZHLZ.comp35641_c0_seq1|ZHLZ.comp49234_c0_seq1|ZHLZ.comp50733_c1_seq1|ZHLZ.comp54988_c0_seq1|ZHLZ.comp59549_c0_seq1|ZHLZ.comp59623_c0_seq1|ZHLZ.comp59856_c0_seq1|	http://www.genome.jp/kegg-bin/show_pathway?ko05012
	KEGG PATHWAY	ko05014	3	54	0.231	0.809798	ZHLZ.comp27157_c0_seq1|ZHLZ.comp35493_c0_seq1|ZHLZ.comp35508_c0_seq1|	http://www.genome.jp/kegg-bin/show_pathway?ko05014
	KEGG PATHWAY	ko05016	12	153	0.003015	0.039195	ZHLZ.comp27213_c0_seq1|ZHLZ.comp35350_c0_seq1|ZHLZ.comp35493_c0_seq1|ZHLZ.comp35508_c0_seq1|ZHLZ.comp35641_c0_seq1|ZHLZ.comp49234_c0_seq1|ZHLZ.comp49261_c3_seq1|ZHLZ.comp50733_c1_seq1|ZHLZ.comp54988_c0_seq1|ZHLZ.comp56700_c0_seq2|ZHLZ.comp59549_c0_seq1|ZHLZ.comp59623_c0_seq1|ZHLZ.comp59856_c0_seq1|	http://www.genome.jp/kegg-bin/show_pathway?ko05016
	KEGG PATHWAY	ko05020	2	34	0.2811	0.901616	ZHLZ.comp35508_c0_seq1|ZHLZ.comp55656_c0_seq1|	http://www.genome.jp/kegg-bin/show_pathway?ko05020
	KEGG PATHWAY	ko05031	2	56	0.6905	0.9999	ZHLZ.comp44152_c0_seq1|ZHLZ.comp44715_c1_seq1|ZHLZ.comp56130_c0_seq1|	http://www.genome.jp/kegg-bin/show_pathway?ko05031
	KEGG PATHWAY	ko05032	1	77	0.7332	0.9999	ZHLZ.comp37256_c0_seq1|ZHLZ.comp61057_c0_seq1|	http://www.genome.jp/kegg-bin/show_pathway?ko05032
	KEGG PATHWAY	ko05033	1	35	0.9999	0.9999	ZHLZ.comp37256_c0_seq1|ZHLZ.comp61057_c0_seq1|	http://www.genome.jp/kegg-bin/show_pathway?ko05033
	KEGG PATHWAY	ko05034	6	95	0.07353	0.44118	ZHLZ.comp26950_c0_seq1|ZHLZ.comp26973_c1_seq1|ZHLZ.comp27001_c0_seq1|ZHLZ.comp35557_c0_seq1|ZHLZ.comp35604_c1_seq1|ZHLZ.comp36181_c0_seq1|ZHLZ.comp44152_c0_seq1|ZHLZ.comp44715_c1_seq1|ZHLZ.comp52051_c1_seq1|ZHLZ.comp55656_c0_seq1|ZHLZ.comp56130_c0_seq1|ZHLZ.comp59440_c0_seq1|ZHLZ.comp59503_c0_seq1|	http://www.genome.jp/kegg-bin/show_pathway?ko05034
	KEGG PATHWAY	ko05100	2	74	0.9999	0.9999	ZHLZ.comp49261_c3_seq1|ZHLZ.comp56700_c0_seq2|ZHLZ.comp60982_c0_seq1|	http://www.genome.jp/kegg-bin/show_pathway?ko05100
	KEGG PATHWAY	ko05110	3	58	0.264	0.8762	ZHLZ.comp45683_c0_seq1|ZHLZ.comp45683_c1_seq1|ZHLZ.comp46207_c0_seq1|ZHLZ.comp46207_c0_seq4|ZHLZ.comp58172_c1_seq3|ZHLZ.comp59789_c0_seq1|	http://www.genome.jp/kegg-bin/show_pathway?ko05110
	KEGG PATHWAY	ko05120	1	98	0.3753	0.930679	ZHLZ.comp58172_c1_seq3|	http://www.genome.jp/kegg-bin/show_pathway?ko05120
	KEGG PATHWAY	ko05130	2	45	0.4043	0.955855	ZHLZ.comp52640_c0_seq1|ZHLZ.comp52640_c0_seq5|ZHLZ.comp55802_c0_seq14|ZHLZ.comp60982_c0_seq1|	http://www.genome.jp/kegg-bin/show_pathway?ko05130
	KEGG PATHWAY	ko05131	2	66	0.9999	0.9999	ZHLZ.comp60982_c0_seq1|ZHLZ.comp62979_c0_seq1|	http://www.genome.jp/kegg-bin/show_pathway?ko05131
	KEGG PATHWAY	ko05132	2	87	0.9999	0.9999	ZHLZ.comp60982_c0_seq1|ZHLZ.comp62979_c0_seq1|	http://www.genome.jp/kegg-bin/show_pathway?ko05132
	KEGG PATHWAY	ko05133	3	90	0.7569	0.9999	ZHLZ.comp24911_c0_seq1|ZHLZ.comp34083_c0_seq1|ZHLZ.comp44152_c0_seq1|ZHLZ.comp49890_c0_seq3|ZHLZ.comp54220_c0_seq2|ZHLZ.comp56130_c0_seq1|ZHLZ.comp60464_c0_seq1|	http://www.genome.jp/kegg-bin/show_pathway?ko05133
	KEGG PATHWAY	ko05134	4	71	0.175	0.737838	ZHLZ.comp35493_c0_seq1|ZHLZ.comp45683_c0_seq1|ZHLZ.comp45683_c1_seq1|ZHLZ.comp45931_c1_seq1|ZHLZ.comp45931_c2_seq1|ZHLZ.comp45931_c3_seq1|ZHLZ.comp46207_c0_seq1|ZHLZ.comp46207_c0_seq4|ZHLZ.comp48028_c0_seq1|	http://www.genome.jp/kegg-bin/show_pathway?ko05134
	KEGG PATHWAY	ko05140	1	65	0.7246	0.9999	ZHLZ.comp54220_c0_seq2|	http://www.genome.jp/kegg-bin/show_pathway?ko05140
	KEGG PATHWAY	ko05142	2	90	0.9999	0.9999	ZHLZ.comp54220_c0_seq2|ZHLZ.comp59849_c0_seq1|	http://www.genome.jp/kegg-bin/show_pathway?ko05142
	KEGG PATHWAY	ko05145	4	98	0.5475	0.987399	ZHLZ.comp27433_c0_seq1|ZHLZ.comp35493_c0_seq1|ZHLZ.comp45931_c1_seq1|ZHLZ.comp45931_c2_seq1|ZHLZ.comp45931_c3_seq1|ZHLZ.comp53768_c0_seq1|ZHLZ.comp53768_c0_seq2|ZHLZ.comp54220_c0_seq2|	http://www.genome.jp/kegg-bin/show_pathway?ko05145
	KEGG PATHWAY	ko05152	5	141	0.6248	0.9999	ZHLZ.comp32988_c0_seq1|ZHLZ.comp32988_c1_seq1|ZHLZ.comp35493_c0_seq1|ZHLZ.comp44152_c0_seq1|ZHLZ.comp49777_c0_seq1|ZHLZ.comp54220_c0_seq2|ZHLZ.comp54434_c1_seq1|ZHLZ.comp56130_c0_seq1|	http://www.genome.jp/kegg-bin/show_pathway?ko05152
	KEGG PATHWAY	ko05161	3	113	0.9999	0.9999	ZHLZ.comp35493_c0_seq1|ZHLZ.comp47926_c0_seq1|ZHLZ.comp55656_c0_seq1|	http://www.genome.jp/kegg-bin/show_pathway?ko05161
	KEGG PATHWAY	ko05162	6	114	0.1684	0.719737	ZHLZ.comp43453_c1_seq1|ZHLZ.comp45931_c1_seq1|ZHLZ.comp45931_c2_seq1|ZHLZ.comp45931_c3_seq1|ZHLZ.comp46484_c0_seq1|ZHLZ.comp47926_c0_seq1|ZHLZ.comp49658_c0_seq1|ZHLZ.comp54220_c0_seq2|	http://www.genome.jp/kegg-bin/show_pathway?ko05162
	KEGG PATHWAY	ko05164	5	128	0.6004	0.9999	ZHLZ.comp35493_c0_seq1|ZHLZ.comp45931_c1_seq1|ZHLZ.comp45931_c2_seq1|ZHLZ.comp45931_c3_seq1|ZHLZ.comp46484_c0_seq1|ZHLZ.comp48084_c0_seq1|ZHLZ.comp55656_c0_seq1|	http://www.genome.jp/kegg-bin/show_pathway?ko05164
	KEGG PATHWAY	ko05165	7	232	0.9999	0.9999	ZHLZ.comp43557_c0_seq1|ZHLZ.comp46484_c0_seq1|ZHLZ.comp47926_c0_seq1|ZHLZ.comp52668_c0_seq1|ZHLZ.comp54613_c0_seq5|ZHLZ.comp55656_c0_seq1|ZHLZ.comp56124_c0_seq1|ZHLZ.comp59946_c0_seq1|	http://www.genome.jp/kegg-bin/show_pathway?ko05165
	KEGG PATHWAY	ko05166	3	218	0.2281	0.808718	ZHLZ.comp48084_c0_seq1|ZHLZ.comp48147_c1_seq1|ZHLZ.comp59849_c0_seq1|	http://www.genome.jp/kegg-bin/show_pathway?ko05166
	KEGG PATHWAY	ko05167	2	161	0.2473	0.848229	ZHLZ.comp35493_c0_seq1|ZHLZ.comp55656_c0_seq1|	http://www.genome.jp/kegg-bin/show_pathway?ko05167
	KEGG PATHWAY	ko05168	6	148	0.4669	0.967565	ZHLZ.comp35493_c0_seq1|ZHLZ.comp35979_c0_seq1|ZHLZ.comp43453_c1_seq1|ZHLZ.comp44715_c1_seq1|ZHLZ.comp47926_c0_seq1|ZHLZ.comp52690_c0_seq1|	http://www.genome.jp/kegg-bin/show_pathway?ko05168
	KEGG PATHWAY	ko05169	5	168	0.9999	0.9999	ZHLZ.comp43453_c1_seq1|ZHLZ.comp45931_c1_seq1|ZHLZ.comp45931_c2_seq1|ZHLZ.comp45931_c3_seq1|ZHLZ.comp47926_c0_seq1|ZHLZ.comp54220_c0_seq2|ZHLZ.comp59640_c0_seq1|	http://www.genome.jp/kegg-bin/show_pathway?ko05169
	KEGG PATHWAY	ko05200	4	344	0.03784	0.287953	ZHLZ.comp35493_c0_seq1|ZHLZ.comp47902_c0_seq1|ZHLZ.comp47926_c0_seq1|ZHLZ.comp55656_c0_seq1|	http://www.genome.jp/kegg-bin/show_pathway?ko05200
	KEGG PATHWAY	ko05202	1	158	0.0973	0.492658	ZHLZ.comp26973_c1_seq1|ZHLZ.comp35604_c1_seq1|ZHLZ.comp52051_c1_seq1|ZHLZ.comp59440_c0_seq1|	http://www.genome.jp/kegg-bin/show_pathway?ko05202
	KEGG PATHWAY	ko05203	4	173	0.8227	0.9999	ZHLZ.comp26950_c0_seq1|ZHLZ.comp47926_c0_seq1|ZHLZ.comp52668_c0_seq1|ZHLZ.comp59503_c0_seq1|ZHLZ.comp59640_c0_seq1|	http://www.genome.jp/kegg-bin/show_pathway?ko05203
	KEGG PATHWAY	ko05204	2	136	0.4476	0.967565	ZHLZ.comp35384_c0_seq1|ZHLZ.comp35980_c0_seq1|ZHLZ.comp45310_c1_seq1|ZHLZ.comp45488_c0_seq1|ZHLZ.comp45740_c0_seq1|ZHLZ.comp45903_c0_seq1|ZHLZ.comp49125_c2_seq1|ZHLZ.comp51834_c0_seq1|ZHLZ.comp54113_c0_seq1|ZHLZ.comp55275_c1_seq1|ZHLZ.comp59593_c0_seq1|ZHLZ.comp86401_c0_seq1|	http://www.genome.jp/kegg-bin/show_pathway?ko05204
	KEGG PATHWAY	ko05205	3	170	0.4973	0.967565	ZHLZ.comp44715_c1_seq1|ZHLZ.comp48524_c0_seq1|ZHLZ.comp55656_c0_seq1|	http://www.genome.jp/kegg-bin/show_pathway?ko05205
	KEGG PATHWAY	ko05206	2	233	0.0519	0.340275	ZHLZ.comp55656_c0_seq1|ZHLZ.comp55992_c0_seq1|ZHLZ.comp58026_c0_seq1|ZHLZ.comp58288_c0_seq1|	http://www.genome.jp/kegg-bin/show_pathway?ko05206
	KEGG PATHWAY	ko05210	2	60	0.7073	0.9999	ZHLZ.comp35493_c0_seq1|ZHLZ.comp55656_c0_seq1|	http://www.genome.jp/kegg-bin/show_pathway?ko05210
	KEGG PATHWAY	ko05211	2	57	0.6946	0.9999	ZHLZ.comp47902_c0_seq1|ZHLZ.comp55656_c0_seq1|	http://www.genome.jp/kegg-bin/show_pathway?ko05211
	KEGG PATHWAY	ko05212	1	64	0.9999	0.9999	ZHLZ.comp55656_c0_seq1|	http://www.genome.jp/kegg-bin/show_pathway?ko05212
	KEGG PATHWAY	ko05213	1	47	0.9999	0.9999	ZHLZ.comp55656_c0_seq1|	http://www.genome.jp/kegg-bin/show_pathway?ko05213
	KEGG PATHWAY	ko05214	2	57	0.6946	0.9999	ZHLZ.comp44152_c0_seq1|ZHLZ.comp55656_c0_seq1|ZHLZ.comp56130_c0_seq1|	http://www.genome.jp/kegg-bin/show_pathway?ko05214
	KEGG PATHWAY	ko05215	2	82	0.9999	0.9999	ZHLZ.comp47926_c0_seq1|ZHLZ.comp55656_c0_seq1|	http://www.genome.jp/kegg-bin/show_pathway?ko05215
	KEGG PATHWAY	ko05216	1	35	0.9999	0.9999	ZHLZ.comp55656_c0_seq1|	http://www.genome.jp/kegg-bin/show_pathway?ko05216
	KEGG PATHWAY	ko05218	1	49	0.9999	0.9999	ZHLZ.comp55656_c0_seq1|	http://www.genome.jp/kegg-bin/show_pathway?ko05218
	KEGG PATHWAY	ko05219	1	39	0.9999	0.9999	ZHLZ.comp55656_c0_seq1|	http://www.genome.jp/kegg-bin/show_pathway?ko05219
	KEGG PATHWAY	ko05220	1	64	0.9999	0.9999	ZHLZ.comp55656_c0_seq1|	http://www.genome.jp/kegg-bin/show_pathway?ko05220
	KEGG PATHWAY	ko05221	1	58	0.9999	0.9999	ZHLZ.comp55656_c0_seq1|	http://www.genome.jp/kegg-bin/show_pathway?ko05221
	KEGG PATHWAY	ko05222	2	78	0.9999	0.9999	ZHLZ.comp35493_c0_seq1|ZHLZ.comp47926_c0_seq1|	http://www.genome.jp/kegg-bin/show_pathway?ko05222
	KEGG PATHWAY	ko05223	1	63	0.9999	0.9999	ZHLZ.comp55656_c0_seq1|	http://www.genome.jp/kegg-bin/show_pathway?ko05223
	KEGG PATHWAY	ko05224	1	106	0.3848	0.930679	ZHLZ.comp55656_c0_seq1|	http://www.genome.jp/kegg-bin/show_pathway?ko05224
	KEGG PATHWAY	ko05230	6	84	0.04542	0.322069	ZHLZ.comp26910_c0_seq1|ZHLZ.comp27189_c0_seq1|ZHLZ.comp46348_c1_seq1|ZHLZ.comp46945_c0_seq1|ZHLZ.comp52668_c0_seq1|ZHLZ.comp54484_c2_seq1|ZHLZ.comp55656_c0_seq1|	http://www.genome.jp/kegg-bin/show_pathway?ko05230
	KEGG PATHWAY	ko05231	3	73	0.492	0.967565	ZHLZ.comp29168_c0_seq1|ZHLZ.comp55656_c0_seq1|ZHLZ.comp55790_c0_seq1|	http://www.genome.jp/kegg-bin/show_pathway?ko05231
	KEGG PATHWAY	ko05322	3	49	0.1909	0.740711	ZHLZ.comp26950_c0_seq1|ZHLZ.comp26973_c1_seq1|ZHLZ.comp27001_c0_seq1|ZHLZ.comp35557_c0_seq1|ZHLZ.comp35604_c1_seq1|ZHLZ.comp36181_c0_seq1|ZHLZ.comp52051_c1_seq1|ZHLZ.comp59440_c0_seq1|ZHLZ.comp59503_c0_seq1|	http://www.genome.jp/kegg-bin/show_pathway?ko05322
	KEGG PATHWAY	ko05323	2	70	0.9999	0.9999	ZHLZ.comp27103_c0_seq1|ZHLZ.comp58172_c1_seq3|	http://www.genome.jp/kegg-bin/show_pathway?ko05323
	KEGG PATHWAY	ko05410	1	79	0.522	0.967565	ZHLZ.comp35701_c0_seq1|ZHLZ.comp52586_c0_seq1|ZHLZ.comp52586_c1_seq1|	http://www.genome.jp/kegg-bin/show_pathway?ko05410
	KEGG PATHWAY	ko05416	1	38	0.9999	0.9999	ZHLZ.comp35493_c0_seq1|	http://www.genome.jp/kegg-bin/show_pathway?ko05416
	KEGG PATHWAY	ko05418	4	107	0.573	0.9999	ZHLZ.comp35384_c0_seq1|ZHLZ.comp35701_c0_seq1|ZHLZ.comp35980_c0_seq1|ZHLZ.comp43315_c0_seq1|ZHLZ.comp44152_c0_seq1|ZHLZ.comp45310_c1_seq1|ZHLZ.comp45740_c0_seq1|ZHLZ.comp45903_c0_seq1|ZHLZ.comp49125_c2_seq1|ZHLZ.comp51319_c0_seq1|ZHLZ.comp51834_c0_seq1|ZHLZ.comp52586_c0_seq1|ZHLZ.comp52586_c1_seq1|ZHLZ.comp54113_c0_seq1|ZHLZ.comp54786_c1_seq1|ZHLZ.comp55275_c1_seq1|ZHLZ.comp56130_c0_seq1|ZHLZ.com…	http://www.genome.jp/kegg-bin/show_pathway?ko05418
	KEGG PATHWAY	ko00010	14	131	3.893e-07	8.26887e-06	ZHLZ.comp26889_c0_seq1|ZHLZ.comp26910_c0_seq1|ZHLZ.comp27189_c0_seq1|ZHLZ.comp35702_c0_seq1|ZHLZ.comp36082_c1_seq1|ZHLZ.comp45488_c0_seq1|ZHLZ.comp45546_c0_seq1|ZHLZ.comp45853_c0_seq1|ZHLZ.comp46348_c1_seq1|ZHLZ.comp46813_c0_seq1|ZHLZ.comp48008_c0_seq1|ZHLZ.comp48853_c0_seq1|ZHLZ.comp49635_c0_seq1|ZHLZ.comp49797_c0_seq1|ZHLZ.comp52668_c0_seq1|ZHLZ.comp54484_c2_seq1|ZHLZ.comp56128_c0_seq1|ZHLZ.com…	http://www.genome.jp/kegg-bin/show_pathway?ko00010
	KEGG PATHWAY	ko00020	9	78	2.351e-05	0.000308105	ZHLZ.comp27189_c0_seq1|ZHLZ.comp27213_c0_seq1|ZHLZ.comp46161_c0_seq1|ZHLZ.comp46161_c0_seq3|ZHLZ.comp46348_c1_seq1|ZHLZ.comp48853_c0_seq1|ZHLZ.comp50733_c1_seq1|ZHLZ.comp53042_c0_seq1|ZHLZ.comp54426_c0_seq1|ZHLZ.comp54484_c2_seq1|ZHLZ.comp57293_c1_seq1|ZHLZ.comp59542_c0_seq1|	http://www.genome.jp/kegg-bin/show_pathway?ko00020
	KEGG PATHWAY	ko00030	7	115	0.007716	0.0600401	ZHLZ.comp26910_c0_seq1|ZHLZ.comp35974_c0_seq1|ZHLZ.comp46351_c0_seq1|ZHLZ.comp46945_c0_seq1|ZHLZ.comp53861_c0_seq1|ZHLZ.comp53861_c1_seq1|ZHLZ.comp56597_c0_seq3|ZHLZ.comp56799_c1_seq3|ZHLZ.comp58735_c1_seq3|ZHLZ.comp59942_c0_seq1|ZHLZ.comp60133_c0_seq1|	http://www.genome.jp/kegg-bin/show_pathway?ko00030
	KEGG PATHWAY	ko00040	3	126	0.7385	0.9999	ZHLZ.comp43301_c0_seq1|ZHLZ.comp49885_c0_seq1|ZHLZ.comp53344_c0_seq1|ZHLZ.comp56129_c0_seq1|	http://www.genome.jp/kegg-bin/show_pathway?ko00040
	KEGG PATHWAY	ko00051	4	163	0.5627	0.9999	ZHLZ.comp26889_c0_seq1|ZHLZ.comp26910_c0_seq1|ZHLZ.comp43301_c0_seq1|ZHLZ.comp45546_c0_seq1|ZHLZ.comp52493_c0_seq1|	http://www.genome.jp/kegg-bin/show_pathway?ko00051
	KEGG PATHWAY	ko00052	4	124	0.3098	0.86403	ZHLZ.comp26910_c0_seq1|ZHLZ.comp43301_c0_seq1|ZHLZ.comp53276_c0_seq1|ZHLZ.comp55628_c0_seq1|ZHLZ.comp56597_c0_seq3|ZHLZ.comp60133_c0_seq1|	http://www.genome.jp/kegg-bin/show_pathway?ko00052
	KEGG PATHWAY	ko00053	2	94	0.7054	0.9999	ZHLZ.comp35702_c0_seq1|ZHLZ.comp49114_c0_seq1|ZHLZ.comp49635_c0_seq1|ZHLZ.comp49797_c0_seq1|	http://www.genome.jp/kegg-bin/show_pathway?ko00053
	KEGG PATHWAY	ko00061	9	84	4.265e-05	0.000505707	ZHLZ.comp27781_c0_seq1|ZHLZ.comp43654_c0_seq1|ZHLZ.comp45166_c0_seq1|ZHLZ.comp45776_c0_seq1|ZHLZ.comp48286_c0_seq1|ZHLZ.comp48345_c1_seq1|ZHLZ.comp53444_c0_seq1|ZHLZ.comp53640_c0_seq1|ZHLZ.comp53640_c1_seq1|ZHLZ.comp59648_c0_seq1|ZHLZ.comp59692_c0_seq1|ZHLZ.comp59918_c0_seq1|ZHLZ.comp61199_c0_seq1|	http://www.genome.jp/kegg-bin/show_pathway?ko00061
	KEGG PATHWAY	ko00062	5	64	0.008387	0.0632837	ZHLZ.comp26923_c0_seq1|ZHLZ.comp27007_c0_seq1|ZHLZ.comp45514_c0_seq1|ZHLZ.comp48801_c0_seq1|ZHLZ.comp55945_c1_seq2|ZHLZ.comp56214_c0_seq2|ZHLZ.comp56214_c1_seq2|ZHLZ.comp58384_c0_seq1|ZHLZ.comp58561_c2_seq2|	http://www.genome.jp/kegg-bin/show_pathway?ko00062
	KEGG PATHWAY	ko00071	6	105	0.01746	0.114409	ZHLZ.comp35702_c0_seq1|ZHLZ.comp43654_c0_seq1|ZHLZ.comp45166_c0_seq1|ZHLZ.comp45488_c0_seq1|ZHLZ.comp49635_c0_seq1|ZHLZ.comp49797_c0_seq1|ZHLZ.comp58329_c1_seq1|ZHLZ.comp58329_c1_seq3|ZHLZ.comp58718_c0_seq1|ZHLZ.comp58913_c0_seq1|	http://www.genome.jp/kegg-bin/show_pathway?ko00071
	KEGG PATHWAY	ko00072	1	15	0.2554	0.7662	ZHLZ.comp53936_c0_seq1|	http://www.genome.jp/kegg-bin/show_pathway?ko00072
	KEGG PATHWAY	ko00073	2	42	0.1971	0.684238	ZHLZ.comp35736_c0_seq1|ZHLZ.comp46620_c2_seq1|ZHLZ.comp48839_c1_seq1|ZHLZ.comp57069_c0_seq10|ZHLZ.comp57069_c0_seq4|	http://www.genome.jp/kegg-bin/show_pathway?ko00073
	KEGG PATHWAY	ko00100	3	82	0.2151	0.694048	ZHLZ.comp43205_c0_seq1|ZHLZ.comp55773_c0_seq1|ZHLZ.comp59748_c0_seq1|	http://www.genome.jp/kegg-bin/show_pathway?ko00100
	KEGG PATHWAY	ko00130	2	147	0.9999	0.9999	ZHLZ.comp27061_c0_seq1|ZHLZ.comp27061_c1_seq1|ZHLZ.comp27255_c0_seq1|ZHLZ.comp27255_c1_seq1|	http://www.genome.jp/kegg-bin/show_pathway?ko00130
	KEGG PATHWAY	ko00140	2	147	0.9999	0.9999	ZHLZ.comp52706_c0_seq1|ZHLZ.comp55945_c1_seq2|	http://www.genome.jp/kegg-bin/show_pathway?ko00140
	KEGG PATHWAY	ko00190	17	232	4.929e-06	9.44093e-05	ZHLZ.comp27213_c0_seq1|ZHLZ.comp35350_c0_seq1|ZHLZ.comp35591_c0_seq1|ZHLZ.comp35673_c0_seq1|ZHLZ.comp43727_c0_seq2|ZHLZ.comp45188_c0_seq1|ZHLZ.comp47668_c0_seq1|ZHLZ.comp48335_c0_seq1|ZHLZ.comp49234_c0_seq1|ZHLZ.comp49501_c0_seq1|ZHLZ.comp50733_c1_seq1|ZHLZ.comp52433_c1_seq1|ZHLZ.comp52600_c0_seq1|ZHLZ.comp54548_c0_seq1|ZHLZ.comp54988_c0_seq1|ZHLZ.comp59549_c0_seq1|ZHLZ.comp59820_c0_seq1|ZHLZ.com…	http://www.genome.jp/kegg-bin/show_pathway?ko00190
	KEGG PATHWAY	ko00195	19	75	4.846e-16	1.20665e-13	ZHLZ.comp26928_c0_seq1|ZHLZ.comp26931_c0_seq2|ZHLZ.comp26992_c1_seq1|ZHLZ.comp27098_c0_seq1|ZHLZ.comp35504_c0_seq1|ZHLZ.comp35609_c0_seq1|ZHLZ.comp46106_c0_seq1|ZHLZ.comp46145_c0_seq1|ZHLZ.comp48739_c0_seq1|ZHLZ.comp50068_c0_seq1|ZHLZ.comp50769_c0_seq2|ZHLZ.comp52537_c1_seq1|ZHLZ.comp59454_c0_seq1|ZHLZ.comp59475_c0_seq1|ZHLZ.comp59486_c0_seq1|ZHLZ.comp59672_c0_seq1|ZHLZ.comp59691_c0_seq1|ZHLZ.com…	http://www.genome.jp/kegg-bin/show_pathway?ko00195
	KEGG PATHWAY	ko00196	7	43	1.94e-05	0.000284153	ZHLZ.comp26926_c0_seq1|ZHLZ.comp26935_c0_seq1|ZHLZ.comp26985_c0_seq2|ZHLZ.comp35584_c0_seq1|ZHLZ.comp35600_c0_seq1|ZHLZ.comp57801_c0_seq1|ZHLZ.comp57801_c1_seq1|ZHLZ.comp59522_c0_seq1|	http://www.genome.jp/kegg-bin/show_pathway?ko00196
	KEGG PATHWAY	ko00220	1	79	0.9999	0.9999	ZHLZ.comp59736_c0_seq1|	http://www.genome.jp/kegg-bin/show_pathway?ko00220
	KEGG PATHWAY	ko00230	6	368	0.8482	0.9999	ZHLZ.comp35454_c0_seq1|ZHLZ.comp36082_c1_seq1|ZHLZ.comp52668_c0_seq1|ZHLZ.comp55009_c0_seq1|ZHLZ.comp56128_c0_seq1|ZHLZ.comp56140_c0_seq1|ZHLZ.comp56597_c0_seq3|ZHLZ.comp59930_c0_seq1|ZHLZ.comp60133_c0_seq1|	http://www.genome.jp/kegg-bin/show_pathway?ko00230
	KEGG PATHWAY	ko00240	2	242	0.339	0.897989	ZHLZ.comp35454_c0_seq1|ZHLZ.comp55009_c0_seq1|	http://www.genome.jp/kegg-bin/show_pathway?ko00240
	KEGG PATHWAY	ko00250	1	96	0.9999	0.9999	ZHLZ.comp59736_c0_seq1|	http://www.genome.jp/kegg-bin/show_pathway?ko00250
	KEGG PATHWAY	ko00260	5	145	0.2115	0.694048	ZHLZ.comp27536_c0_seq1|ZHLZ.comp43882_c0_seq1|ZHLZ.comp48853_c0_seq1|ZHLZ.comp52412_c0_seq1|ZHLZ.comp58636_c0_seq4|	http://www.genome.jp/kegg-bin/show_pathway?ko00260
	KEGG PATHWAY	ko00261	1	68	0.9999	0.9999	ZHLZ.comp52412_c0_seq1|	http://www.genome.jp/kegg-bin/show_pathway?ko00261
	KEGG PATHWAY	ko00270	11	162	0.0004016	0.00399994	ZHLZ.comp35521_c0_seq1|ZHLZ.comp46161_c0_seq1|ZHLZ.comp46161_c0_seq3|ZHLZ.comp47868_c0_seq1|ZHLZ.comp49915_c0_seq1|ZHLZ.comp49915_c1_seq1|ZHLZ.comp52412_c0_seq1|ZHLZ.comp54886_c0_seq1|ZHLZ.comp56132_c0_seq1|ZHLZ.comp57462_c0_seq1|ZHLZ.comp57462_c1_seq2|ZHLZ.comp57462_c2_seq2|ZHLZ.comp59690_c0_seq1|ZHLZ.comp59736_c0_seq1|ZHLZ.comp59797_c0_seq1|	http://www.genome.jp/kegg-bin/show_pathway?ko00270
	KEGG PATHWAY	ko00280	5	111	0.06714	0.315431	ZHLZ.comp35464_c0_seq1|ZHLZ.comp35702_c0_seq1|ZHLZ.comp48853_c0_seq1|ZHLZ.comp49635_c0_seq1|ZHLZ.comp49797_c0_seq1|ZHLZ.comp53936_c0_seq1|ZHLZ.comp58718_c0_seq1|	http://www.genome.jp/kegg-bin/show_pathway?ko00280
	KEGG PATHWAY	ko00300	1	81	0.9999	0.9999	ZHLZ.comp52412_c0_seq1|	http://www.genome.jp/kegg-bin/show_pathway?ko00300
	KEGG PATHWAY	ko00310	1	129	0.5241	0.9999	ZHLZ.comp35702_c0_seq1|ZHLZ.comp49635_c0_seq1|ZHLZ.comp49797_c0_seq1|	http://www.genome.jp/kegg-bin/show_pathway?ko00310
	KEGG PATHWAY	ko00330	2	177	0.7794	0.9999	ZHLZ.comp35702_c0_seq1|ZHLZ.comp49635_c0_seq1|ZHLZ.comp49797_c0_seq1|ZHLZ.comp59736_c0_seq1|	http://www.genome.jp/kegg-bin/show_pathway?ko00330
	KEGG PATHWAY	ko00333	2	39	0.176	0.644471	ZHLZ.comp48286_c0_seq1|ZHLZ.comp59692_c0_seq1|ZHLZ.comp61199_c0_seq1|	http://www.genome.jp/kegg-bin/show_pathway?ko00333
	KEGG PATHWAY	ko00340	1	94	0.9999	0.9999	ZHLZ.comp35702_c0_seq1|ZHLZ.comp49635_c0_seq1|ZHLZ.comp49797_c0_seq1|	http://www.genome.jp/kegg-bin/show_pathway?ko00340
	KEGG PATHWAY	ko00350	5	149	0.2198	0.694048	ZHLZ.comp26963_c0_seq1|ZHLZ.comp45488_c0_seq1|ZHLZ.comp47117_c0_seq1|ZHLZ.comp52111_c0_seq1|ZHLZ.comp58329_c1_seq1|ZHLZ.comp58329_c1_seq3|ZHLZ.comp59736_c0_seq1|	http://www.genome.jp/kegg-bin/show_pathway?ko00350
	KEGG PATHWAY	ko00360	4	149	0.5406	0.9999	ZHLZ.comp27061_c0_seq1|ZHLZ.comp27061_c1_seq1|ZHLZ.comp27255_c0_seq1|ZHLZ.comp27255_c1_seq1|ZHLZ.comp43564_c0_seq1|ZHLZ.comp43564_c1_seq1|ZHLZ.comp43564_c2_seq1|ZHLZ.comp43564_c3_seq1|ZHLZ.comp59736_c0_seq1|	http://www.genome.jp/kegg-bin/show_pathway?ko00360
	KEGG PATHWAY	ko00380	3	150	0.7684	0.9999	ZHLZ.comp35702_c0_seq1|ZHLZ.comp36142_c1_seq1|ZHLZ.comp49635_c0_seq1|ZHLZ.comp49797_c0_seq1|ZHLZ.comp59437_c0_seq1|	http://www.genome.jp/kegg-bin/show_pathway?ko00380
	KEGG PATHWAY	ko00400	6	108	0.01977	0.123068	ZHLZ.comp27539_c0_seq1|ZHLZ.comp43882_c0_seq1|ZHLZ.comp46429_c0_seq1|ZHLZ.comp48345_c0_seq1|ZHLZ.comp55629_c0_seq1|ZHLZ.comp59736_c0_seq1|	http://www.genome.jp/kegg-bin/show_pathway?ko00400
	KEGG PATHWAY	ko00410	3	76	0.1852	0.66833	ZHLZ.comp35464_c0_seq1|ZHLZ.comp35702_c0_seq1|ZHLZ.comp49635_c0_seq1|ZHLZ.comp49797_c0_seq1|ZHLZ.comp58718_c0_seq1|	http://www.genome.jp/kegg-bin/show_pathway?ko00410
	KEGG PATHWAY	ko00450	2	56	0.2979	0.85261	ZHLZ.comp35521_c0_seq1|ZHLZ.comp57462_c0_seq1|ZHLZ.comp57462_c1_seq2|ZHLZ.comp57462_c2_seq2|	http://www.genome.jp/kegg-bin/show_pathway?ko00450
	KEGG PATHWAY	ko00460	4	80	0.07169	0.324968	ZHLZ.comp26845_c0_seq1|ZHLZ.comp36142_c0_seq1|ZHLZ.comp43729_c0_seq1|ZHLZ.comp47439_c0_seq1|ZHLZ.comp54462_c0_seq1|ZHLZ.comp54462_c1_seq1|ZHLZ.comp54462_c1_seq2|ZHLZ.comp54869_c0_seq1|ZHLZ.comp54886_c0_seq1|ZHLZ.comp57437_c1_seq2|ZHLZ.comp58678_c0_seq2|	http://www.genome.jp/kegg-bin/show_pathway?ko00460
	KEGG PATHWAY	ko00480	4	82	0.07695	0.342153	ZHLZ.comp27514_c0_seq1|ZHLZ.comp35384_c0_seq1|ZHLZ.comp41023_c0_seq1|ZHLZ.comp45310_c1_seq1|ZHLZ.comp46945_c0_seq1|ZHLZ.comp47918_c0_seq1|ZHLZ.comp49114_c0_seq1|ZHLZ.comp54113_c0_seq1|ZHLZ.comp59767_c0_seq1|	http://www.genome.jp/kegg-bin/show_pathway?ko00480
	KEGG PATHWAY	ko00500	11	147	0.0001743	0.00197276	ZHLZ.comp26845_c0_seq1|ZHLZ.comp36142_c0_seq1|ZHLZ.comp43729_c0_seq1|ZHLZ.comp47439_c0_seq1|ZHLZ.comp50082_c0_seq1|ZHLZ.comp51503_c0_seq1|ZHLZ.comp52173_c0_seq1|ZHLZ.comp53234_c1_seq2|ZHLZ.comp53234_c1_seq3|ZHLZ.comp53276_c0_seq1|ZHLZ.comp54462_c0_seq1|ZHLZ.comp54462_c1_seq1|ZHLZ.comp54462_c1_seq2|ZHLZ.comp54801_c0_seq1|ZHLZ.comp54869_c0_seq1|ZHLZ.comp55250_c0_seq1|ZHLZ.comp55291_c1_seq1|ZHLZ.com…	http://www.genome.jp/kegg-bin/show_pathway?ko00500
	KEGG PATHWAY	ko00510	2	80	0.6699	0.9999	ZHLZ.comp35734_c0_seq1|ZHLZ.comp59514_c0_seq1|	http://www.genome.jp/kegg-bin/show_pathway?ko00510
	KEGG PATHWAY	ko00513	2	83	0.6772	0.9999	ZHLZ.comp35734_c0_seq1|ZHLZ.comp59514_c0_seq1|	http://www.genome.jp/kegg-bin/show_pathway?ko00513
	KEGG PATHWAY	ko00514	1	27	0.4118	0.940717	ZHLZ.comp27320_c0_seq1|	http://www.genome.jp/kegg-bin/show_pathway?ko00514
	KEGG PATHWAY	ko00520	7	260	0.361	0.919521	ZHLZ.comp26793_c0_seq1|ZHLZ.comp44918_c0_seq2|ZHLZ.comp46824_c0_seq1|ZHLZ.comp48606_c0_seq1|ZHLZ.comp51304_c0_seq1|ZHLZ.comp51884_c0_seq1|ZHLZ.comp54095_c0_seq1|ZHLZ.comp56597_c0_seq3|ZHLZ.comp60133_c0_seq1|ZHLZ.comp64075_c0_seq1|	http://www.genome.jp/kegg-bin/show_pathway?ko00520
	KEGG PATHWAY	ko00521	1	43	0.5704	0.9999	ZHLZ.comp56597_c0_seq3|ZHLZ.comp60133_c0_seq1|	http://www.genome.jp/kegg-bin/show_pathway?ko00521
	KEGG PATHWAY	ko00550	1	73	0.9999	0.9999	ZHLZ.comp52228_c0_seq1|	http://www.genome.jp/kegg-bin/show_pathway?ko00550
	KEGG PATHWAY	ko00561	8	114	0.001912	0.0164168	ZHLZ.comp26932_c0_seq1|ZHLZ.comp30332_c0_seq1|ZHLZ.comp35702_c0_seq1|ZHLZ.comp36137_c0_seq1|ZHLZ.comp43301_c0_seq1|ZHLZ.comp49048_c0_seq1|ZHLZ.comp49635_c0_seq1|ZHLZ.comp49797_c0_seq1|ZHLZ.comp51990_c0_seq1|ZHLZ.comp59675_c0_seq1|ZHLZ.comp64075_c0_seq1|	http://www.genome.jp/kegg-bin/show_pathway?ko00561
	KEGG PATHWAY	ko00562	1	113	0.7284	0.9999	ZHLZ.comp26889_c0_seq1|ZHLZ.comp45546_c0_seq1|	http://www.genome.jp/kegg-bin/show_pathway?ko00562
	KEGG PATHWAY	ko00564	4	162	0.5609	0.9999	ZHLZ.comp26932_c0_seq1|ZHLZ.comp36137_c0_seq1|ZHLZ.comp51990_c0_seq1|ZHLZ.comp55452_c0_seq2|ZHLZ.comp59915_c0_seq1|	http://www.genome.jp/kegg-bin/show_pathway?ko00564
	KEGG PATHWAY	ko00590	1	121	0.7335	0.9999	ZHLZ.comp59767_c0_seq1|	http://www.genome.jp/kegg-bin/show_pathway?ko00590
	KEGG PATHWAY	ko00591	2	54	0.2834	0.820542	ZHLZ.comp47430_c0_seq1|ZHLZ.comp47430_c1_seq1|ZHLZ.comp54069_c0_seq1|ZHLZ.comp56023_c0_seq1|ZHLZ.comp58977_c1_seq1|	http://www.genome.jp/kegg-bin/show_pathway?ko00591
	KEGG PATHWAY	ko00592	6	66	0.001876	0.0164168	ZHLZ.comp49790_c0_seq1|ZHLZ.comp53363_c0_seq1|ZHLZ.comp54069_c0_seq1|ZHLZ.comp55008_c0_seq1|ZHLZ.comp55606_c0_seq1|ZHLZ.comp56023_c0_seq1|ZHLZ.comp58913_c0_seq1|	http://www.genome.jp/kegg-bin/show_pathway?ko00592
	KEGG PATHWAY	ko00600	2	67	0.3758	0.919608	ZHLZ.comp49001_c0_seq2|ZHLZ.comp49001_c1_seq1|ZHLZ.comp52466_c0_seq1|	http://www.genome.jp/kegg-bin/show_pathway?ko00600
	KEGG PATHWAY	ko00620	9	128	0.001015	0.00936056	ZHLZ.comp27189_c0_seq1|ZHLZ.comp35702_c0_seq1|ZHLZ.comp36082_c1_seq1|ZHLZ.comp45776_c0_seq1|ZHLZ.comp46161_c0_seq1|ZHLZ.comp46161_c0_seq3|ZHLZ.comp46348_c1_seq1|ZHLZ.comp48853_c0_seq1|ZHLZ.comp49635_c0_seq1|ZHLZ.comp49797_c0_seq1|ZHLZ.comp52668_c0_seq1|ZHLZ.comp54484_c2_seq1|ZHLZ.comp56128_c0_seq1|ZHLZ.comp57293_c1_seq1|ZHLZ.comp59918_c0_seq1|	http://www.genome.jp/kegg-bin/show_pathway?ko00620
	KEGG PATHWAY	ko00625	3	73	0.1707	0.634393	ZHLZ.comp35702_c0_seq1|ZHLZ.comp45488_c0_seq1|ZHLZ.comp49635_c0_seq1|ZHLZ.comp49797_c0_seq1|ZHLZ.comp58329_c1_seq1|ZHLZ.comp58329_c1_seq3|	http://www.genome.jp/kegg-bin/show_pathway?ko00625
	KEGG PATHWAY	ko00626	2	90	0.6949	0.9999	ZHLZ.comp45488_c0_seq1|ZHLZ.comp58329_c1_seq1|ZHLZ.comp58329_c1_seq3|	http://www.genome.jp/kegg-bin/show_pathway?ko00626
	KEGG PATHWAY	ko00630	5	156	0.2358	0.724867	ZHLZ.comp46161_c0_seq1|ZHLZ.comp46161_c0_seq3|ZHLZ.comp48853_c0_seq1|ZHLZ.comp53042_c0_seq1|ZHLZ.comp58636_c0_seq4|ZHLZ.comp59437_c0_seq1|	http://www.genome.jp/kegg-bin/show_pathway?ko00630
	KEGG PATHWAY	ko00640	5	149	0.2198	0.694048	ZHLZ.comp35464_c0_seq1|ZHLZ.comp45776_c0_seq1|ZHLZ.comp48853_c0_seq1|ZHLZ.comp58718_c0_seq1|ZHLZ.comp59918_c0_seq1|	http://www.genome.jp/kegg-bin/show_pathway?ko00640
	KEGG PATHWAY	ko00650	1	135	0.5263	0.9999	ZHLZ.comp53936_c0_seq1|	http://www.genome.jp/kegg-bin/show_pathway?ko00650
	KEGG PATHWAY	ko00680	3	249	0.6384	0.9999	ZHLZ.comp26910_c0_seq1|ZHLZ.comp45488_c0_seq1|ZHLZ.comp46813_c0_seq1|ZHLZ.comp48008_c0_seq1|	http://www.genome.jp/kegg-bin/show_pathway?ko00680
	KEGG PATHWAY	ko00710	8	60	2.278e-05	0.000308105	ZHLZ.comp26889_c0_seq1|ZHLZ.comp27237_c0_seq1|ZHLZ.comp35974_c0_seq1|ZHLZ.comp45546_c0_seq1|ZHLZ.comp45853_c0_seq1|ZHLZ.comp46161_c0_seq1|ZHLZ.comp46161_c0_seq3|ZHLZ.comp48016_c0_seq1|ZHLZ.comp53861_c0_seq1|ZHLZ.comp53861_c1_seq1|ZHLZ.comp56799_c1_seq3|ZHLZ.comp58735_c1_seq3|ZHLZ.comp59736_c0_seq1|	http://www.genome.jp/kegg-bin/show_pathway?ko00710
	KEGG PATHWAY	ko00720	3	148	0.7655	0.9999	ZHLZ.comp45776_c0_seq1|ZHLZ.comp54426_c0_seq1|ZHLZ.comp59542_c0_seq1|ZHLZ.comp59918_c0_seq1|	http://www.genome.jp/kegg-bin/show_pathway?ko00720
	KEGG PATHWAY	ko00730	2	65	0.3619	0.919521	ZHLZ.comp58022_c0_seq5|ZHLZ.comp58777_c6_seq9|	http://www.genome.jp/kegg-bin/show_pathway?ko00730
	KEGG PATHWAY	ko00760	1	145	0.5344	0.9999	ZHLZ.comp55009_c0_seq1|	http://www.genome.jp/kegg-bin/show_pathway?ko00760
	KEGG PATHWAY	ko00780	4	52	0.01874	0.119648	ZHLZ.comp27781_c0_seq1|ZHLZ.comp48286_c0_seq1|ZHLZ.comp59648_c0_seq1|ZHLZ.comp59692_c0_seq1|ZHLZ.comp61199_c0_seq1|	http://www.genome.jp/kegg-bin/show_pathway?ko00780
	KEGG PATHWAY	ko00830	2	73	0.6544	0.9999	ZHLZ.comp45488_c0_seq1|ZHLZ.comp58329_c1_seq1|ZHLZ.comp58329_c1_seq3|	http://www.genome.jp/kegg-bin/show_pathway?ko00830
	KEGG PATHWAY	ko00860	3	263	0.4964	0.9999	ZHLZ.comp35595_c0_seq1|ZHLZ.comp50461_c0_seq1|ZHLZ.comp57620_c1_seq1|	http://www.genome.jp/kegg-bin/show_pathway?ko00860
	KEGG PATHWAY	ko00900	11	103	6.533e-06	0.000116194	ZHLZ.comp27339_c0_seq1|ZHLZ.comp35837_c0_seq1|ZHLZ.comp37355_c0_seq1|ZHLZ.comp43393_c0_seq1|ZHLZ.comp44095_c0_seq1|ZHLZ.comp44095_c1_seq1|ZHLZ.comp44788_c0_seq1|ZHLZ.comp48084_c0_seq1|ZHLZ.comp53936_c0_seq1|ZHLZ.comp57620_c1_seq1|ZHLZ.comp58022_c0_seq5|ZHLZ.comp59540_c0_seq1|	http://www.genome.jp/kegg-bin/show_pathway?ko00900
	KEGG PATHWAY	ko00901	1	61	0.9999	0.9999	ZHLZ.comp57839_c0_seq6|ZHLZ.comp57839_c0_seq7|	http://www.genome.jp/kegg-bin/show_pathway?ko00901
	KEGG PATHWAY	ko00902	1	84	0.9999	0.9999	ZHLZ.comp43081_c0_seq1|ZHLZ.comp55105_c1_seq1|ZHLZ.comp58816_c1_seq34|	http://www.genome.jp/kegg-bin/show_pathway?ko00902
	KEGG PATHWAY	ko00903	1	77	0.9999	0.9999	ZHLZ.comp35702_c0_seq1|ZHLZ.comp49635_c0_seq1|ZHLZ.comp49797_c0_seq1|	http://www.genome.jp/kegg-bin/show_pathway?ko00903
	KEGG PATHWAY	ko00904	1	156	0.3776	0.919608	ZHLZ.comp58775_c0_seq39|	http://www.genome.jp/kegg-bin/show_pathway?ko00904
	KEGG PATHWAY	ko00905	1	41	0.5532	0.9999	ZHLZ.comp59405_c3_seq1|	http://www.genome.jp/kegg-bin/show_pathway?ko00905
	KEGG PATHWAY	ko00906	4	162	0.5609	0.9999	ZHLZ.comp51734_c0_seq1|ZHLZ.comp51919_c0_seq1|ZHLZ.comp53180_c5_seq1|ZHLZ.comp59016_c0_seq1|	http://www.genome.jp/kegg-bin/show_pathway?ko00906
	KEGG PATHWAY	ko00909	2	160	0.7732	0.9999	ZHLZ.comp27339_c0_seq1|ZHLZ.comp55773_c0_seq1|	http://www.genome.jp/kegg-bin/show_pathway?ko00909
	KEGG PATHWAY	ko00910	3	80	0.205	0.689797	ZHLZ.comp50706_c0_seq1|ZHLZ.comp57326_c0_seq1|ZHLZ.comp58000_c5_seq1|	http://www.genome.jp/kegg-bin/show_pathway?ko00910
	KEGG PATHWAY	ko00920	4	132	0.3307	0.895047	ZHLZ.comp35493_c0_seq1|ZHLZ.comp47868_c0_seq1|ZHLZ.comp54886_c0_seq1|ZHLZ.comp59797_c0_seq1|	http://www.genome.jp/kegg-bin/show_pathway?ko00920
	KEGG PATHWAY	ko00940	13	101	1.124e-07	3.1623e-06	ZHLZ.comp26845_c0_seq1|ZHLZ.comp27061_c0_seq1|ZHLZ.comp27061_c1_seq1|ZHLZ.comp27255_c0_seq1|ZHLZ.comp27255_c1_seq1|ZHLZ.comp35478_c0_seq1|ZHLZ.comp35603_c0_seq1|ZHLZ.comp36142_c0_seq1|ZHLZ.comp43564_c0_seq1|ZHLZ.comp43564_c1_seq1|ZHLZ.comp43564_c2_seq1|ZHLZ.comp43564_c3_seq1|ZHLZ.comp43729_c0_seq1|ZHLZ.comp47439_c0_seq1|ZHLZ.comp49009_c0_seq1|ZHLZ.comp49432_c0_seq1|ZHLZ.comp50377_c0_seq1|ZHLZ.com…	http://www.genome.jp/kegg-bin/show_pathway?ko00940
	KEGG PATHWAY	ko00941	6	91	0.009096	0.0666148	ZHLZ.comp27061_c0_seq1|ZHLZ.comp27061_c1_seq1|ZHLZ.comp35478_c0_seq1|ZHLZ.comp53323_c0_seq1|ZHLZ.comp54855_c0_seq1|ZHLZ.comp56208_c1_seq1|ZHLZ.comp56208_c2_seq1|ZHLZ.comp56809_c5_seq1|ZHLZ.comp60846_c0_seq1|	http://www.genome.jp/kegg-bin/show_pathway?ko00941
	KEGG PATHWAY	ko00944	1	62	0.9999	0.9999	ZHLZ.comp53323_c0_seq1|ZHLZ.comp56208_c1_seq1|ZHLZ.comp56208_c2_seq1|	http://www.genome.jp/kegg-bin/show_pathway?ko00944
	KEGG PATHWAY	ko00945	2	38	0.1691	0.634393	ZHLZ.comp27061_c0_seq1|ZHLZ.comp27061_c1_seq1|ZHLZ.comp35478_c0_seq1|	http://www.genome.jp/kegg-bin/show_pathway?ko00945
	KEGG PATHWAY	ko00950	3	139	0.7533	0.9999	ZHLZ.comp26963_c0_seq1|ZHLZ.comp47117_c0_seq1|ZHLZ.comp52111_c0_seq1|ZHLZ.comp59736_c0_seq1|	http://www.genome.jp/kegg-bin/show_pathway?ko00950
	KEGG PATHWAY	ko00960	1	95	0.9999	0.9999	ZHLZ.comp59736_c0_seq1|	http://www.genome.jp/kegg-bin/show_pathway?ko00960
	KEGG PATHWAY	ko00965	1	32	0.4668	0.9999	ZHLZ.comp47117_c0_seq1|ZHLZ.comp52111_c0_seq1|	http://www.genome.jp/kegg-bin/show_pathway?ko00965
	KEGG PATHWAY	ko00980	3	155	0.9999	0.9999	ZHLZ.comp27514_c0_seq1|ZHLZ.comp35384_c0_seq1|ZHLZ.comp41023_c0_seq1|ZHLZ.comp45310_c1_seq1|ZHLZ.comp45488_c0_seq1|ZHLZ.comp47918_c0_seq1|ZHLZ.comp54113_c0_seq1|ZHLZ.comp58329_c1_seq1|ZHLZ.comp58329_c1_seq3|	http://www.genome.jp/kegg-bin/show_pathway?ko00980
	KEGG PATHWAY	ko00981	1	44	0.5787	0.9999	ZHLZ.comp35702_c0_seq1|ZHLZ.comp49635_c0_seq1|ZHLZ.comp49797_c0_seq1|	http://www.genome.jp/kegg-bin/show_pathway?ko00981
	KEGG PATHWAY	ko00982	3	125	0.7376	0.9999	ZHLZ.comp27514_c0_seq1|ZHLZ.comp35384_c0_seq1|ZHLZ.comp41023_c0_seq1|ZHLZ.comp45310_c1_seq1|ZHLZ.comp45488_c0_seq1|ZHLZ.comp47918_c0_seq1|ZHLZ.comp54113_c0_seq1|ZHLZ.comp58329_c1_seq1|ZHLZ.comp58329_c1_seq3|	http://www.genome.jp/kegg-bin/show_pathway?ko00982
	KEGG PATHWAY	ko01040	5	82	0.02253	0.133571	ZHLZ.comp26934_c0_seq1|ZHLZ.comp48286_c0_seq1|ZHLZ.comp53444_c0_seq1|ZHLZ.comp53640_c0_seq1|ZHLZ.comp53640_c1_seq1|ZHLZ.comp55945_c1_seq2|ZHLZ.comp58913_c0_seq1|ZHLZ.comp59684_c0_seq1|ZHLZ.comp61199_c0_seq1|	http://www.genome.jp/kegg-bin/show_pathway?ko01040
	KEGG PATHWAY	ko01051	1	65	0.9999	0.9999	ZHLZ.comp53861_c0_seq1|ZHLZ.comp53861_c1_seq1|ZHLZ.comp56799_c1_seq3|ZHLZ.comp58735_c1_seq3|	http://www.genome.jp/kegg-bin/show_pathway?ko01051
	KEGG PATHWAY	ko01100	153	4666	1.336e-07	3.32664e-06	ZHLZ.comp26793_c0_seq1|ZHLZ.comp26845_c0_seq1|ZHLZ.comp26889_c0_seq1|ZHLZ.comp26910_c0_seq1|ZHLZ.comp26923_c0_seq1|ZHLZ.comp26928_c0_seq1|ZHLZ.comp26931_c0_seq2|ZHLZ.comp26932_c0_seq1|ZHLZ.comp26963_c0_seq1|ZHLZ.comp26985_c0_seq2|ZHLZ.comp26992_c1_seq1|ZHLZ.comp27007_c0_seq1|ZHLZ.comp27061_c0_seq1|ZHLZ.comp27061_c1_seq1|ZHLZ.comp27098_c0_seq1|ZHLZ.comp27189_c0_seq1|ZHLZ.comp27213_c0_seq1|ZHLZ.com…	http://www.genome.jp/kegg-bin/show_pathway?ko01100
	KEGG PATHWAY	ko01110	93	2131	7.357e-11	6.10631e-09	ZHLZ.comp26845_c0_seq1|ZHLZ.comp26889_c0_seq1|ZHLZ.comp26910_c0_seq1|ZHLZ.comp26932_c0_seq1|ZHLZ.comp26963_c0_seq1|ZHLZ.comp27061_c0_seq1|ZHLZ.comp27061_c1_seq1|ZHLZ.comp27081_c0_seq1|ZHLZ.comp27189_c0_seq1|ZHLZ.comp27213_c0_seq1|ZHLZ.comp27255_c0_seq1|ZHLZ.comp27255_c1_seq1|ZHLZ.comp27539_c0_seq1|ZHLZ.comp35317_c0_seq1|ZHLZ.comp35454_c0_seq1|ZHLZ.comp35478_c0_seq1|ZHLZ.comp35595_c0_seq1|ZHLZ.com…	http://www.genome.jp/kegg-bin/show_pathway?ko01110
	KEGG PATHWAY	ko01120	35	2069	0.4979	0.9999	ZHLZ.comp26889_c0_seq1|ZHLZ.comp26910_c0_seq1|ZHLZ.comp27189_c0_seq1|ZHLZ.comp27213_c0_seq1|ZHLZ.comp27237_c0_seq1|ZHLZ.comp35317_c0_seq1|ZHLZ.comp35493_c0_seq1|ZHLZ.comp35702_c0_seq1|ZHLZ.comp35974_c0_seq1|ZHLZ.comp36082_c1_seq1|ZHLZ.comp45005_c0_seq1|ZHLZ.comp45488_c0_seq1|ZHLZ.comp45546_c0_seq1|ZHLZ.comp45776_c0_seq1|ZHLZ.comp45853_c0_seq1|ZHLZ.comp46161_c0_seq1|ZHLZ.comp46161_c0_seq3|ZHLZ.com…	http://www.genome.jp/kegg-bin/show_pathway?ko01120
	KEGG PATHWAY	ko01130	49	1919	0.07178	0.324968	ZHLZ.comp26889_c0_seq1|ZHLZ.comp26910_c0_seq1|ZHLZ.comp27189_c0_seq1|ZHLZ.comp27213_c0_seq1|ZHLZ.comp27339_c0_seq1|ZHLZ.comp27539_c0_seq1|ZHLZ.comp35454_c0_seq1|ZHLZ.comp35702_c0_seq1|ZHLZ.comp35837_c0_seq1|ZHLZ.comp35974_c0_seq1|ZHLZ.comp36082_c1_seq1|ZHLZ.comp37355_c0_seq1|ZHLZ.comp43205_c0_seq1|ZHLZ.comp43393_c0_seq1|ZHLZ.comp43882_c0_seq1|ZHLZ.comp44095_c0_seq1|ZHLZ.comp44095_c1_seq1|ZHLZ.com…	http://www.genome.jp/kegg-bin/show_pathway?ko01130
	KEGG PATHWAY	ko01200	31	452	5.431e-09	2.70464e-07	ZHLZ.comp26889_c0_seq1|ZHLZ.comp26910_c0_seq1|ZHLZ.comp27189_c0_seq1|ZHLZ.comp27213_c0_seq1|ZHLZ.comp27237_c0_seq1|ZHLZ.comp35464_c0_seq1|ZHLZ.comp35974_c0_seq1|ZHLZ.comp36082_c1_seq1|ZHLZ.comp45488_c0_seq1|ZHLZ.comp45546_c0_seq1|ZHLZ.comp45776_c0_seq1|ZHLZ.comp45853_c0_seq1|ZHLZ.comp46161_c0_seq1|ZHLZ.comp46161_c0_seq3|ZHLZ.comp46348_c1_seq1|ZHLZ.comp46351_c0_seq1|ZHLZ.comp46813_c0_seq1|ZHLZ.com…	http://www.genome.jp/kegg-bin/show_pathway?ko01200
	KEGG PATHWAY	ko01210	3	213	0.802	0.9999	ZHLZ.comp52412_c0_seq1|ZHLZ.comp53042_c0_seq1|ZHLZ.comp59736_c0_seq1|	http://www.genome.jp/kegg-bin/show_pathway?ko01210
	KEGG PATHWAY	ko01212	14	177	1.351e-05	0.000210249	ZHLZ.comp26923_c0_seq1|ZHLZ.comp26934_c0_seq1|ZHLZ.comp27007_c0_seq1|ZHLZ.comp27781_c0_seq1|ZHLZ.comp43654_c0_seq1|ZHLZ.comp45166_c0_seq1|ZHLZ.comp45776_c0_seq1|ZHLZ.comp48286_c0_seq1|ZHLZ.comp53444_c0_seq1|ZHLZ.comp53640_c0_seq1|ZHLZ.comp53640_c1_seq1|ZHLZ.comp55945_c1_seq2|ZHLZ.comp58718_c0_seq1|ZHLZ.comp58913_c0_seq1|ZHLZ.comp59648_c0_seq1|ZHLZ.comp59684_c0_seq1|ZHLZ.comp59692_c0_seq1|ZHLZ.com…	http://www.genome.jp/kegg-bin/show_pathway?ko01212
	KEGG PATHWAY	ko01220	3	466	0.03849	0.212978	ZHLZ.comp27061_c0_seq1|ZHLZ.comp27061_c1_seq1|ZHLZ.comp45488_c0_seq1|ZHLZ.comp58329_c1_seq1|ZHLZ.comp58329_c1_seq3|	http://www.genome.jp/kegg-bin/show_pathway?ko01220
	KEGG PATHWAY	ko01230	20	352	3.32e-05	0.00041334	ZHLZ.comp26889_c0_seq1|ZHLZ.comp26910_c0_seq1|ZHLZ.comp27539_c0_seq1|ZHLZ.comp35974_c0_seq1|ZHLZ.comp36082_c1_seq1|ZHLZ.comp43882_c0_seq1|ZHLZ.comp45546_c0_seq1|ZHLZ.comp45853_c0_seq1|ZHLZ.comp46351_c0_seq1|ZHLZ.comp46429_c0_seq1|ZHLZ.comp46813_c0_seq1|ZHLZ.comp47868_c0_seq1|ZHLZ.comp48008_c0_seq1|ZHLZ.comp48345_c0_seq1|ZHLZ.comp52412_c0_seq1|ZHLZ.comp52668_c0_seq1|ZHLZ.comp53042_c0_seq1|ZHLZ.com…	http://www.genome.jp/kegg-bin/show_pathway?ko01230
	KEGG PATHWAY	ko01502	1	46	0.5949	0.9999	ZHLZ.comp52228_c0_seq1|	http://www.genome.jp/kegg-bin/show_pathway?ko01502
	KEGG PATHWAY	ko01524	2	49	0.2473	0.750948	ZHLZ.comp27514_c0_seq1|ZHLZ.comp35384_c0_seq1|ZHLZ.comp35493_c0_seq1|ZHLZ.comp41023_c0_seq1|ZHLZ.comp45310_c1_seq1|ZHLZ.comp47918_c0_seq1|ZHLZ.comp54113_c0_seq1|	http://www.genome.jp/kegg-bin/show_pathway?ko01524
	KEGG PATHWAY	ko02010	1	606	0.0001954	0.00211542	ZHLZ.comp56603_c3_seq1|ZHLZ.comp58026_c0_seq1|ZHLZ.comp58288_c0_seq1|	http://www.genome.jp/kegg-bin/show_pathway?ko02010
	KEGG PATHWAY	ko02020	3	536	0.01507	0.107212	ZHLZ.comp35350_c0_seq1|ZHLZ.comp35493_c0_seq1|ZHLZ.comp49234_c0_seq1|	http://www.genome.jp/kegg-bin/show_pathway?ko02020
	KEGG PATHWAY	ko02024	3	338	0.2258	0.702802	ZHLZ.comp43654_c0_seq1|ZHLZ.comp45166_c0_seq1|ZHLZ.comp46062_c0_seq1|ZHLZ.comp53344_c0_seq1|	http://www.genome.jp/kegg-bin/show_pathway?ko02024
	KEGG PATHWAY	ko03010	24	144	2.279e-15	2.83735e-13	ZHLZ.comp26769_c0_seq1|ZHLZ.comp26939_c0_seq1|ZHLZ.comp26951_c0_seq1|ZHLZ.comp26959_c0_seq1|ZHLZ.comp26981_c1_seq1|ZHLZ.comp35542_c0_seq1|ZHLZ.comp35577_c0_seq1|ZHLZ.comp35606_c0_seq1|ZHLZ.comp35608_c0_seq1|ZHLZ.comp35728_c0_seq3|ZHLZ.comp36126_c0_seq1|ZHLZ.comp45728_c0_seq1|ZHLZ.comp47691_c0_seq2|ZHLZ.comp47691_c0_seq3|ZHLZ.comp48374_c0_seq2|ZHLZ.comp48382_c0_seq1|ZHLZ.comp48409_c0_seq1|ZHLZ.com…	http://www.genome.jp/kegg-bin/show_pathway?ko03010
	KEGG PATHWAY	ko03013	1	142	0.5314	0.9999	ZHLZ.comp43419_c0_seq1|ZHLZ.comp58305_c1_seq3|	http://www.genome.jp/kegg-bin/show_pathway?ko03013
	KEGG PATHWAY	ko03015	1	60	0.9999	0.9999	ZHLZ.comp59946_c0_seq1|	http://www.genome.jp/kegg-bin/show_pathway?ko03015
	KEGG PATHWAY	ko03018	3	79	0.2	0.684238	ZHLZ.comp26910_c0_seq1|ZHLZ.comp43590_c0_seq1|ZHLZ.comp46813_c0_seq1|ZHLZ.comp48008_c0_seq1|	http://www.genome.jp/kegg-bin/show_pathway?ko03018
	KEGG PATHWAY	ko03040	1	123	0.7352	0.9999	ZHLZ.comp45931_c1_seq1|	http://www.genome.jp/kegg-bin/show_pathway?ko03040
	KEGG PATHWAY	ko03060	3	40	0.04297	0.22765	ZHLZ.comp35488_c0_seq1|ZHLZ.comp46062_c0_seq1|ZHLZ.comp59789_c0_seq1|	http://www.genome.jp/kegg-bin/show_pathway?ko03060
	KEGG PATHWAY	ko03320	4	67	0.04223	0.22765	ZHLZ.comp26959_c1_seq1|ZHLZ.comp43654_c0_seq1|ZHLZ.comp45166_c0_seq1|ZHLZ.comp45313_c1_seq1|ZHLZ.comp56138_c0_seq4|ZHLZ.comp56138_c0_seq5|ZHLZ.comp58718_c0_seq1|ZHLZ.comp58913_c0_seq1|	http://www.genome.jp/kegg-bin/show_pathway?ko03320
	KEGG PATHWAY	ko04010	1	199	0.1919	0.682616	ZHLZ.comp45931_c1_seq1|	http://www.genome.jp/kegg-bin/show_pathway?ko04010
	KEGG PATHWAY	ko04011	2	91	0.6975	0.9999	ZHLZ.comp55452_c0_seq2|ZHLZ.comp59437_c0_seq1|	http://www.genome.jp/kegg-bin/show_pathway?ko04011
	KEGG PATHWAY	ko04013	1	85	0.9999	0.9999	ZHLZ.comp26946_c0_seq1|	http://www.genome.jp/kegg-bin/show_pathway?ko04013
	KEGG PATHWAY	ko04014	1	175	0.2691	0.797689	ZHLZ.comp44152_c0_seq1|ZHLZ.comp56130_c0_seq1|ZHLZ.comp57119_c7_seq1|ZHLZ.comp57119_c8_seq1|ZHLZ.comp63264_c0_seq1|	http://www.genome.jp/kegg-bin/show_pathway?ko04014
	KEGG PATHWAY	ko04015	2	162	0.7736	0.9999	ZHLZ.comp44152_c0_seq1|ZHLZ.comp45601_c0_seq1|ZHLZ.comp56130_c0_seq1|ZHLZ.comp57119_c7_seq1|ZHLZ.comp57119_c8_seq1|ZHLZ.comp63264_c0_seq1|	http://www.genome.jp/kegg-bin/show_pathway?ko04015
	KEGG PATHWAY	ko04016	10	55	1.143e-07	3.1623e-06	ZHLZ.comp35076_c0_seq1|ZHLZ.comp35454_c0_seq1|ZHLZ.comp35860_c0_seq1|ZHLZ.comp44152_c0_seq1|ZHLZ.comp48606_c0_seq1|ZHLZ.comp48984_c0_seq1|ZHLZ.comp49947_c0_seq1|ZHLZ.comp49947_c1_seq1|ZHLZ.comp50012_c0_seq2|ZHLZ.comp53308_c0_seq1|ZHLZ.comp54170_c0_seq1|ZHLZ.comp54447_c0_seq1|ZHLZ.comp55114_c0_seq1|ZHLZ.comp56130_c0_seq1|ZHLZ.comp57119_c7_seq1|ZHLZ.comp57119_c8_seq1|ZHLZ.comp59437_c0_seq1|ZHLZ.com…	http://www.genome.jp/kegg-bin/show_pathway?ko04016
	KEGG PATHWAY	ko04020	4	153	0.5462	0.9999	ZHLZ.comp44152_c0_seq1|ZHLZ.comp49001_c0_seq2|ZHLZ.comp49001_c1_seq1|ZHLZ.comp56130_c0_seq1|ZHLZ.comp57119_c7_seq1|ZHLZ.comp57119_c8_seq1|ZHLZ.comp58150_c3_seq1|ZHLZ.comp59476_c0_seq1|ZHLZ.comp63264_c0_seq1|	http://www.genome.jp/kegg-bin/show_pathway?ko04020
	KEGG PATHWAY	ko04022	3	132	0.7448	0.9999	ZHLZ.comp44152_c0_seq1|ZHLZ.comp56130_c0_seq1|ZHLZ.comp57119_c7_seq1|ZHLZ.comp57119_c8_seq1|ZHLZ.comp58150_c3_seq1|ZHLZ.comp59476_c0_seq1|ZHLZ.comp63264_c0_seq1|	http://www.genome.jp/kegg-bin/show_pathway?ko04022
	KEGG PATHWAY	ko04024	2	187	0.5912	0.9999	ZHLZ.comp44152_c0_seq1|ZHLZ.comp56130_c0_seq1|ZHLZ.comp57119_c7_seq1|ZHLZ.comp57119_c8_seq1|ZHLZ.comp58913_c0_seq1|ZHLZ.comp63264_c0_seq1|	http://www.genome.jp/kegg-bin/show_pathway?ko04024
	KEGG PATHWAY	ko04066	4	87	0.09092	0.390329	ZHLZ.comp27189_c0_seq1|ZHLZ.comp45853_c0_seq1|ZHLZ.comp46348_c1_seq1|ZHLZ.comp46813_c0_seq1|ZHLZ.comp48008_c0_seq1|ZHLZ.comp54484_c2_seq1|	http://www.genome.jp/kegg-bin/show_pathway?ko04066
	KEGG PATHWAY	ko04068	3	107	0.4674	0.9999	ZHLZ.comp26946_c0_seq1|ZHLZ.comp35701_c0_seq1|ZHLZ.comp59437_c0_seq1|	http://www.genome.jp/kegg-bin/show_pathway?ko04068
	KEGG PATHWAY	ko04070	2	85	0.6821	0.9999	ZHLZ.comp36137_c0_seq1|ZHLZ.comp44152_c0_seq1|ZHLZ.comp56130_c0_seq1|ZHLZ.comp57119_c7_seq1|ZHLZ.comp57119_c8_seq1|ZHLZ.comp63264_c0_seq1|	http://www.genome.jp/kegg-bin/show_pathway?ko04070
	KEGG PATHWAY	ko04071	2	95	0.708	0.9999	ZHLZ.comp49001_c0_seq2|ZHLZ.comp49001_c1_seq1|ZHLZ.comp59946_c0_seq1|	http://www.genome.jp/kegg-bin/show_pathway?ko04071
	KEGG PATHWAY	ko04072	2	116	0.9999	0.9999	ZHLZ.comp36137_c0_seq1|ZHLZ.comp49001_c0_seq2|ZHLZ.comp49001_c1_seq1|	http://www.genome.jp/kegg-bin/show_pathway?ko04072
	KEGG PATHWAY	ko04075	12	58	1.351e-09	8.40997e-08	ZHLZ.comp122381_c0_seq1|ZHLZ.comp26919_c0_seq1|ZHLZ.comp27096_c0_seq1|ZHLZ.comp27317_c0_seq1|ZHLZ.comp35076_c0_seq1|ZHLZ.comp35860_c0_seq1|ZHLZ.comp37429_c0_seq1|ZHLZ.comp37656_c0_seq1|ZHLZ.comp40423_c0_seq1|ZHLZ.comp48704_c0_seq1|ZHLZ.comp49947_c0_seq1|ZHLZ.comp49947_c1_seq1|ZHLZ.comp50012_c0_seq2|ZHLZ.comp50884_c0_seq1|ZHLZ.comp51125_c0_seq1|ZHLZ.comp52395_c0_seq1|ZHLZ.comp53308_c0_seq1|ZHLZ.co…	http://www.genome.jp/kegg-bin/show_pathway?ko04075
	KEGG PATHWAY	ko04110	1	110	0.7272	0.9999	ZHLZ.comp54928_c0_seq1|	http://www.genome.jp/kegg-bin/show_pathway?ko04110
	KEGG PATHWAY	ko04111	1	125	0.7369	0.9999	ZHLZ.comp54928_c0_seq1|	http://www.genome.jp/kegg-bin/show_pathway?ko04111
	KEGG PATHWAY	ko04112	2	33	0.1351	0.533967	ZHLZ.comp45526_c0_seq1|ZHLZ.comp48888_c0_seq1|ZHLZ.comp52228_c0_seq1|	http://www.genome.jp/kegg-bin/show_pathway?ko04112
	KEGG PATHWAY	ko04113	2	103	0.9999	0.9999	ZHLZ.comp54928_c0_seq1|ZHLZ.comp59946_c0_seq1|	http://www.genome.jp/kegg-bin/show_pathway?ko04113
	KEGG PATHWAY	ko04114	3	83	0.2202	0.694048	ZHLZ.comp44152_c0_seq1|ZHLZ.comp54928_c0_seq1|ZHLZ.comp56130_c0_seq1|ZHLZ.comp57119_c7_seq1|ZHLZ.comp57119_c8_seq1|ZHLZ.comp59946_c0_seq1|ZHLZ.comp63264_c0_seq1|	http://www.genome.jp/kegg-bin/show_pathway?ko04114
	KEGG PATHWAY	ko04115	1	63	0.9999	0.9999	ZHLZ.comp35493_c0_seq1|	http://www.genome.jp/kegg-bin/show_pathway?ko04115
	KEGG PATHWAY	ko04120	2	126	0.9999	0.9999	ZHLZ.comp54928_c0_seq1|ZHLZ.comp59066_c0_seq1|	http://www.genome.jp/kegg-bin/show_pathway?ko04120
	KEGG PATHWAY	ko04140	1	105	0.726	0.9999	ZHLZ.comp35701_c0_seq1|	http://www.genome.jp/kegg-bin/show_pathway?ko04140
	KEGG PATHWAY	ko04141	9	147	0.002626	0.0217958	ZHLZ.comp35488_c0_seq1|ZHLZ.comp35734_c0_seq1|ZHLZ.comp43886_c0_seq1|ZHLZ.comp45931_c1_seq1|ZHLZ.comp46905_c0_seq1|ZHLZ.comp47034_c0_seq1|ZHLZ.comp48982_c0_seq1|ZHLZ.comp48982_c1_seq1|ZHLZ.comp48982_c2_seq1|ZHLZ.comp52163_c0_seq1|ZHLZ.comp59514_c0_seq1|ZHLZ.comp59789_c0_seq1|	http://www.genome.jp/kegg-bin/show_pathway?ko04141
	KEGG PATHWAY	ko04142	2	108	0.9999	0.9999	ZHLZ.comp27007_c0_seq1|ZHLZ.comp48038_c0_seq1|	http://www.genome.jp/kegg-bin/show_pathway?ko04142
	KEGG PATHWAY	ko04144	1	185	0.2736	0.801487	ZHLZ.comp45931_c1_seq1|	http://www.genome.jp/kegg-bin/show_pathway?ko04144
	KEGG PATHWAY	ko04145	4	97	0.1221	0.498408	ZHLZ.comp35488_c0_seq1|ZHLZ.comp45601_c0_seq1|ZHLZ.comp49501_c0_seq1|ZHLZ.comp59789_c0_seq1|	http://www.genome.jp/kegg-bin/show_pathway?ko04145
	KEGG PATHWAY	ko04146	7	73	0.0005852	0.00560442	ZHLZ.comp26946_c0_seq1|ZHLZ.comp35837_c0_seq1|ZHLZ.comp43654_c0_seq1|ZHLZ.comp44583_c0_seq1|ZHLZ.comp45166_c0_seq1|ZHLZ.comp57069_c0_seq10|ZHLZ.comp57069_c0_seq4|ZHLZ.comp58913_c0_seq1|ZHLZ.comp59437_c0_seq1|	http://www.genome.jp/kegg-bin/show_pathway?ko04146
	KEGG PATHWAY	ko04150	2	118	0.9999	0.9999	ZHLZ.comp35701_c0_seq1|ZHLZ.comp49501_c0_seq1|	http://www.genome.jp/kegg-bin/show_pathway?ko04150
	KEGG PATHWAY	ko04151	2	247	0.3427	0.898235	ZHLZ.comp35701_c0_seq1|ZHLZ.comp59946_c0_seq1|	http://www.genome.jp/kegg-bin/show_pathway?ko04151
	KEGG PATHWAY	ko04152	5	108	0.06118	0.29564	ZHLZ.comp26910_c0_seq1|ZHLZ.comp35701_c0_seq1|ZHLZ.comp43393_c0_seq1|ZHLZ.comp56927_c0_seq1|ZHLZ.comp59946_c0_seq1|	http://www.genome.jp/kegg-bin/show_pathway?ko04152
	KEGG PATHWAY	ko04210	3	114	0.4888	0.9999	ZHLZ.comp35493_c0_seq1|ZHLZ.comp45601_c0_seq1|ZHLZ.comp48038_c0_seq1|	http://www.genome.jp/kegg-bin/show_pathway?ko04210
	KEGG PATHWAY	ko04211	4	76	0.06174	0.29564	ZHLZ.comp26946_c0_seq1|ZHLZ.comp35701_c0_seq1|ZHLZ.comp56927_c0_seq1|ZHLZ.comp59437_c0_seq1|	http://www.genome.jp/kegg-bin/show_pathway?ko04211
	KEGG PATHWAY	ko04212	4	68	0.0442	0.229288	ZHLZ.comp26946_c0_seq1|ZHLZ.comp45526_c0_seq1|ZHLZ.comp48888_c0_seq1|ZHLZ.comp57069_c0_seq10|ZHLZ.comp57069_c0_seq4|ZHLZ.comp59437_c0_seq1|	http://www.genome.jp/kegg-bin/show_pathway?ko04212
	KEGG PATHWAY	ko04213	5	61	0.006867	0.0551575	ZHLZ.comp26946_c0_seq1|ZHLZ.comp35701_c0_seq1|ZHLZ.comp44583_c0_seq1|ZHLZ.comp45931_c1_seq1|ZHLZ.comp59437_c0_seq1|	http://www.genome.jp/kegg-bin/show_pathway?ko04213
	KEGG PATHWAY	ko04214	2	58	0.3122	0.86403	ZHLZ.comp27967_c0_seq1|ZHLZ.comp35493_c0_seq1|ZHLZ.comp35564_c0_seq1|	http://www.genome.jp/kegg-bin/show_pathway?ko04214
	KEGG PATHWAY	ko04215	1	40	0.5443	0.9999	ZHLZ.comp35493_c0_seq1|	http://www.genome.jp/kegg-bin/show_pathway?ko04215
	KEGG PATHWAY	ko04216	2	65	0.3619	0.919521	ZHLZ.comp43654_c0_seq1|ZHLZ.comp45166_c0_seq1|ZHLZ.comp58150_c3_seq1|	http://www.genome.jp/kegg-bin/show_pathway?ko04216
	KEGG PATHWAY	ko04217	2	107	0.9999	0.9999	ZHLZ.comp58150_c3_seq1|ZHLZ.comp59476_c0_seq1|	http://www.genome.jp/kegg-bin/show_pathway?ko04217
	KEGG PATHWAY	ko04218	3	122	0.515	0.9999	ZHLZ.comp44152_c0_seq1|ZHLZ.comp56130_c0_seq1|ZHLZ.comp57119_c7_seq1|ZHLZ.comp57119_c8_seq1|ZHLZ.comp58150_c3_seq1|ZHLZ.comp59476_c0_seq1|ZHLZ.comp63264_c0_seq1|	http://www.genome.jp/kegg-bin/show_pathway?ko04218
	KEGG PATHWAY	ko04260	3	65	0.1338	0.533967	ZHLZ.comp35350_c0_seq1|ZHLZ.comp43727_c0_seq2|ZHLZ.comp49234_c0_seq1|ZHLZ.comp52433_c1_seq1|	http://www.genome.jp/kegg-bin/show_pathway?ko04260
	KEGG PATHWAY	ko04261	2	104	0.9999	0.9999	ZHLZ.comp44152_c0_seq1|ZHLZ.comp56130_c0_seq1|ZHLZ.comp57119_c7_seq1|ZHLZ.comp57119_c8_seq1|ZHLZ.comp59946_c0_seq1|ZHLZ.comp63264_c0_seq1|	http://www.genome.jp/kegg-bin/show_pathway?ko04261
	KEGG PATHWAY	ko04270	1	113	0.7284	0.9999	ZHLZ.comp44152_c0_seq1|ZHLZ.comp56130_c0_seq1|ZHLZ.comp57119_c7_seq1|ZHLZ.comp57119_c8_seq1|ZHLZ.comp63264_c0_seq1|	http://www.genome.jp/kegg-bin/show_pathway?ko04270
	KEGG PATHWAY	ko04370	1	46	0.5949	0.9999	ZHLZ.comp49001_c0_seq2|ZHLZ.comp49001_c1_seq1|	http://www.genome.jp/kegg-bin/show_pathway?ko04370
	KEGG PATHWAY	ko04371	3	112	0.4825	0.9999	ZHLZ.comp35701_c0_seq1|ZHLZ.comp44152_c0_seq1|ZHLZ.comp49001_c0_seq2|ZHLZ.comp49001_c1_seq1|ZHLZ.comp56130_c0_seq1|ZHLZ.comp57119_c7_seq1|ZHLZ.comp57119_c8_seq1|ZHLZ.comp63264_c0_seq1|	http://www.genome.jp/kegg-bin/show_pathway?ko04371
	KEGG PATHWAY	ko04390	1	112	0.728	0.9999	ZHLZ.comp45601_c0_seq1|	http://www.genome.jp/kegg-bin/show_pathway?ko04390
	KEGG PATHWAY	ko04391	1	53	0.9999	0.9999	ZHLZ.comp45601_c0_seq1|	http://www.genome.jp/kegg-bin/show_pathway?ko04391
	KEGG PATHWAY	ko04510	1	151	0.3762	0.919608	ZHLZ.comp45601_c0_seq1|	http://www.genome.jp/kegg-bin/show_pathway?ko04510
	KEGG PATHWAY	ko04520	1	61	0.9999	0.9999	ZHLZ.comp45601_c0_seq1|	http://www.genome.jp/kegg-bin/show_pathway?ko04520
	KEGG PATHWAY	ko04530	2	103	0.9999	0.9999	ZHLZ.comp35701_c0_seq1|ZHLZ.comp45601_c0_seq1|	http://www.genome.jp/kegg-bin/show_pathway?ko04530
	KEGG PATHWAY	ko04611	1	104	0.7259	0.9999	ZHLZ.comp45601_c0_seq1|	http://www.genome.jp/kegg-bin/show_pathway?ko04611
	KEGG PATHWAY	ko04612	1	42	0.5618	0.9999	ZHLZ.comp45931_c1_seq1|	http://www.genome.jp/kegg-bin/show_pathway?ko04612
	KEGG PATHWAY	ko04621	2	152	0.9999	0.9999	ZHLZ.comp54786_c1_seq1|ZHLZ.comp58150_c3_seq1|	http://www.genome.jp/kegg-bin/show_pathway?ko04621
	KEGG PATHWAY	ko04622	1	54	0.9999	0.9999	ZHLZ.comp51817_c0_seq1|	http://www.genome.jp/kegg-bin/show_pathway?ko04622
	KEGG PATHWAY	ko04624	1	49	0.6181	0.9999	ZHLZ.comp60915_c0_seq1|	http://www.genome.jp/kegg-bin/show_pathway?ko04624
	KEGG PATHWAY	ko04626	8	84	0.0002549	0.00264459	ZHLZ.comp27084_c0_seq1|ZHLZ.comp44152_c0_seq1|ZHLZ.comp47722_c0_seq1|ZHLZ.comp47993_c2_seq1|ZHLZ.comp48984_c0_seq1|ZHLZ.comp54447_c0_seq1|ZHLZ.comp54447_c0_seq4|ZHLZ.comp55114_c0_seq1|ZHLZ.comp56130_c0_seq1|ZHLZ.comp57119_c7_seq1|ZHLZ.comp57119_c8_seq1|ZHLZ.comp58384_c0_seq1|ZHLZ.comp59921_c0_seq1|ZHLZ.comp63264_c0_seq1|	http://www.genome.jp/kegg-bin/show_pathway?ko04626
	KEGG PATHWAY	ko04666	1	67	0.9999	0.9999	ZHLZ.comp49001_c0_seq2|ZHLZ.comp49001_c1_seq1|	http://www.genome.jp/kegg-bin/show_pathway?ko04666
	KEGG PATHWAY	ko04670	1	80	0.9999	0.9999	ZHLZ.comp45601_c0_seq1|	http://www.genome.jp/kegg-bin/show_pathway?ko04670
	KEGG PATHWAY	ko04710	1	27	0.4118	0.940717	ZHLZ.comp35701_c0_seq1|	http://www.genome.jp/kegg-bin/show_pathway?ko04710
	KEGG PATHWAY	ko04712	3	28	0.01692	0.113867	ZHLZ.comp53088_c0_seq1|ZHLZ.comp56138_c0_seq2|ZHLZ.comp60846_c0_seq1|	http://www.genome.jp/kegg-bin/show_pathway?ko04712
	KEGG PATHWAY	ko04713	1	90	0.9999	0.9999	ZHLZ.comp44152_c0_seq1|ZHLZ.comp56130_c0_seq1|ZHLZ.comp57119_c7_seq1|ZHLZ.comp57119_c8_seq1|ZHLZ.comp63264_c0_seq1|	http://www.genome.jp/kegg-bin/show_pathway?ko04713
	KEGG PATHWAY	ko04720	1	51	0.9999	0.9999	ZHLZ.comp44152_c0_seq1|ZHLZ.comp56130_c0_seq1|ZHLZ.comp57119_c7_seq1|ZHLZ.comp57119_c8_seq1|ZHLZ.comp63264_c0_seq1|	http://www.genome.jp/kegg-bin/show_pathway?ko04720
	KEGG PATHWAY	ko04721	1	53	0.9999	0.9999	ZHLZ.comp49501_c0_seq1|	http://www.genome.jp/kegg-bin/show_pathway?ko04721
	KEGG PATHWAY	ko04722	1	96	0.9999	0.9999	ZHLZ.comp44152_c0_seq1|ZHLZ.comp56130_c0_seq1|ZHLZ.comp57119_c7_seq1|ZHLZ.comp57119_c8_seq1|ZHLZ.comp63264_c0_seq1|	http://www.genome.jp/kegg-bin/show_pathway?ko04722
	KEGG PATHWAY	ko04723	5	139	0.2006	0.684238	ZHLZ.comp35591_c0_seq1|ZHLZ.comp47668_c0_seq1|ZHLZ.comp59549_c0_seq1|ZHLZ.comp59675_c0_seq1|ZHLZ.comp59820_c0_seq1|	http://www.genome.jp/kegg-bin/show_pathway?ko04723
	KEGG PATHWAY	ko04724	1	94	0.9999	0.9999	ZHLZ.comp44422_c0_seq1|	http://www.genome.jp/kegg-bin/show_pathway?ko04724
	KEGG PATHWAY	ko04727	1	75	0.9999	0.9999	ZHLZ.comp44422_c0_seq1|	http://www.genome.jp/kegg-bin/show_pathway?ko04727
	KEGG PATHWAY	ko04728	2	96	0.7107	0.9999	ZHLZ.comp44152_c0_seq1|ZHLZ.comp56130_c0_seq1|ZHLZ.comp57119_c7_seq1|ZHLZ.comp57119_c8_seq1|ZHLZ.comp59946_c0_seq1|ZHLZ.comp63264_c0_seq1|	http://www.genome.jp/kegg-bin/show_pathway?ko04728
	KEGG PATHWAY	ko04740	1	34	0.4873	0.9999	ZHLZ.comp44152_c0_seq1|ZHLZ.comp56130_c0_seq1|ZHLZ.comp57119_c7_seq1|ZHLZ.comp57119_c8_seq1|ZHLZ.comp63264_c0_seq1|	http://www.genome.jp/kegg-bin/show_pathway?ko04740
	KEGG PATHWAY	ko04744	1	27	0.4118	0.940717	ZHLZ.comp44152_c0_seq1|ZHLZ.comp56130_c0_seq1|ZHLZ.comp57119_c7_seq1|ZHLZ.comp57119_c8_seq1|ZHLZ.comp63264_c0_seq1|	http://www.genome.jp/kegg-bin/show_pathway?ko04744
	KEGG PATHWAY	ko04745	2	30	0.1155	0.483475	ZHLZ.comp44152_c0_seq1|ZHLZ.comp45601_c0_seq1|ZHLZ.comp56130_c0_seq1|ZHLZ.comp57119_c7_seq1|ZHLZ.comp57119_c8_seq1|ZHLZ.comp63264_c0_seq1|	http://www.genome.jp/kegg-bin/show_pathway?ko04745
	KEGG PATHWAY	ko04750	1	104	0.7259	0.9999	ZHLZ.comp44152_c0_seq1|ZHLZ.comp56130_c0_seq1|ZHLZ.comp57119_c7_seq1|ZHLZ.comp57119_c8_seq1|ZHLZ.comp63264_c0_seq1|	http://www.genome.jp/kegg-bin/show_pathway?ko04750
	KEGG PATHWAY	ko04810	1	158	0.3786	0.919608	ZHLZ.comp45601_c0_seq1|	http://www.genome.jp/kegg-bin/show_pathway?ko04810
	KEGG PATHWAY	ko04910	2	91	0.6975	0.9999	ZHLZ.comp35701_c0_seq1|ZHLZ.comp44152_c0_seq1|ZHLZ.comp56130_c0_seq1|ZHLZ.comp57119_c7_seq1|ZHLZ.comp57119_c8_seq1|ZHLZ.comp63264_c0_seq1|	http://www.genome.jp/kegg-bin/show_pathway?ko04910
	KEGG PATHWAY	ko04912	1	70	0.9999	0.9999	ZHLZ.comp44152_c0_seq1|ZHLZ.comp56130_c0_seq1|ZHLZ.comp57119_c7_seq1|ZHLZ.comp57119_c8_seq1|ZHLZ.comp63264_c0_seq1|	http://www.genome.jp/kegg-bin/show_pathway?ko04912
	KEGG PATHWAY	ko04913	1	64	0.9999	0.9999	ZHLZ.comp52706_c0_seq1|	http://www.genome.jp/kegg-bin/show_pathway?ko04913
	KEGG PATHWAY	ko04915	2	75	0.6586	0.9999	ZHLZ.comp44152_c0_seq1|ZHLZ.comp45931_c1_seq1|ZHLZ.comp56130_c0_seq1|ZHLZ.comp57119_c7_seq1|ZHLZ.comp57119_c8_seq1|ZHLZ.comp63264_c0_seq1|	http://www.genome.jp/kegg-bin/show_pathway?ko04915
	KEGG PATHWAY	ko04916	2	74	0.6565	0.9999	ZHLZ.comp44152_c0_seq1|ZHLZ.comp47117_c0_seq1|ZHLZ.comp52111_c0_seq1|ZHLZ.comp56130_c0_seq1|ZHLZ.comp57119_c7_seq1|ZHLZ.comp57119_c8_seq1|ZHLZ.comp63264_c0_seq1|	http://www.genome.jp/kegg-bin/show_pathway?ko04916
	KEGG PATHWAY	ko04917	1	69	0.9999	0.9999	ZHLZ.comp52706_c0_seq1|	http://www.genome.jp/kegg-bin/show_pathway?ko04917
	KEGG PATHWAY	ko04918	1	74	0.9999	0.9999	ZHLZ.comp59767_c0_seq1|	http://www.genome.jp/kegg-bin/show_pathway?ko04918
	KEGG PATHWAY	ko04919	1	99	0.9999	0.9999	ZHLZ.comp45601_c0_seq1|	http://www.genome.jp/kegg-bin/show_pathway?ko04919
	KEGG PATHWAY	ko04920	3	61	0.1165	0.483475	ZHLZ.comp35701_c0_seq1|ZHLZ.comp43654_c0_seq1|ZHLZ.comp45166_c0_seq1|ZHLZ.comp56927_c0_seq1|	http://www.genome.jp/kegg-bin/show_pathway?ko04920
	KEGG PATHWAY	ko04921	4	125	0.3123	0.86403	ZHLZ.comp35701_c0_seq1|ZHLZ.comp44152_c0_seq1|ZHLZ.comp45069_c0_seq1|ZHLZ.comp45601_c0_seq1|ZHLZ.comp56130_c0_seq1|ZHLZ.comp57119_c7_seq1|ZHLZ.comp57119_c8_seq1|ZHLZ.comp63264_c0_seq1|	http://www.genome.jp/kegg-bin/show_pathway?ko04921
	KEGG PATHWAY	ko04922	5	82	0.02253	0.133571	ZHLZ.comp27189_c0_seq1|ZHLZ.comp35701_c0_seq1|ZHLZ.comp36082_c1_seq1|ZHLZ.comp44152_c0_seq1|ZHLZ.comp46348_c1_seq1|ZHLZ.comp52668_c0_seq1|ZHLZ.comp54484_c2_seq1|ZHLZ.comp56128_c0_seq1|ZHLZ.comp56130_c0_seq1|ZHLZ.comp57119_c7_seq1|ZHLZ.comp57119_c8_seq1|ZHLZ.comp63264_c0_seq1|	http://www.genome.jp/kegg-bin/show_pathway?ko04922
	KEGG PATHWAY	ko04923	1	60	0.9999	0.9999	ZHLZ.comp59675_c0_seq1|	http://www.genome.jp/kegg-bin/show_pathway?ko04923
	KEGG PATHWAY	ko04924	1	68	0.9999	0.9999	ZHLZ.comp44152_c0_seq1|ZHLZ.comp56130_c0_seq1|ZHLZ.comp57119_c7_seq1|ZHLZ.comp57119_c8_seq1|ZHLZ.comp63264_c0_seq1|	http://www.genome.jp/kegg-bin/show_pathway?ko04924
	KEGG PATHWAY	ko04925	2	83	0.6772	0.9999	ZHLZ.comp44152_c0_seq1|ZHLZ.comp45069_c0_seq1|ZHLZ.comp56130_c0_seq1|ZHLZ.comp57119_c7_seq1|ZHLZ.comp57119_c8_seq1|ZHLZ.comp63264_c0_seq1|	http://www.genome.jp/kegg-bin/show_pathway?ko04925
	KEGG PATHWAY	ko04930	1	44	0.5787	0.9999	ZHLZ.comp36082_c1_seq1|ZHLZ.comp52668_c0_seq1|ZHLZ.comp56128_c0_seq1|	http://www.genome.jp/kegg-bin/show_pathway?ko04930
	KEGG PATHWAY	ko04931	1	94	0.9999	0.9999	ZHLZ.comp35701_c0_seq1|	http://www.genome.jp/kegg-bin/show_pathway?ko04931
	KEGG PATHWAY	ko04932	12	127	9.09e-06	0.000150894	ZHLZ.comp27213_c0_seq1|ZHLZ.comp35350_c0_seq1|ZHLZ.comp35493_c0_seq1|ZHLZ.comp35591_c0_seq1|ZHLZ.comp35701_c0_seq1|ZHLZ.comp43727_c0_seq2|ZHLZ.comp47668_c0_seq1|ZHLZ.comp49234_c0_seq1|ZHLZ.comp50733_c1_seq1|ZHLZ.comp52433_c1_seq1|ZHLZ.comp56927_c0_seq1|ZHLZ.comp59549_c0_seq1|ZHLZ.comp59820_c0_seq1|	http://www.genome.jp/kegg-bin/show_pathway?ko04932
	KEGG PATHWAY	ko04964	1	32	0.4668	0.9999	ZHLZ.comp46161_c0_seq1|ZHLZ.comp46161_c0_seq3|	http://www.genome.jp/kegg-bin/show_pathway?ko04964
	KEGG PATHWAY	ko04966	1	26	0.4001	0.939858	ZHLZ.comp49501_c0_seq1|	http://www.genome.jp/kegg-bin/show_pathway?ko04966
	KEGG PATHWAY	ko04970	1	81	0.9999	0.9999	ZHLZ.comp44152_c0_seq1|ZHLZ.comp56130_c0_seq1|ZHLZ.comp57119_c7_seq1|ZHLZ.comp57119_c8_seq1|ZHLZ.comp63264_c0_seq1|	http://www.genome.jp/kegg-bin/show_pathway?ko04970
	KEGG PATHWAY	ko04971	1	64	0.9999	0.9999	ZHLZ.comp44152_c0_seq1|ZHLZ.comp56130_c0_seq1|ZHLZ.comp57119_c7_seq1|ZHLZ.comp57119_c8_seq1|ZHLZ.comp63264_c0_seq1|	http://www.genome.jp/kegg-bin/show_pathway?ko04971
	KEGG PATHWAY	ko04974	1	104	0.7259	0.9999	ZHLZ.comp44422_c0_seq1|	http://www.genome.jp/kegg-bin/show_pathway?ko04974
	KEGG PATHWAY	ko04976	2	235	0.3354	0.897989	ZHLZ.comp43393_c0_seq1|ZHLZ.comp56603_c3_seq1|ZHLZ.comp58026_c0_seq1|ZHLZ.comp58288_c0_seq1|	http://www.genome.jp/kegg-bin/show_pathway?ko04976
	KEGG PATHWAY	ko05010	15	151	3.985e-07	8.26887e-06	ZHLZ.comp27213_c0_seq1|ZHLZ.comp35350_c0_seq1|ZHLZ.comp35493_c0_seq1|ZHLZ.comp35591_c0_seq1|ZHLZ.comp43727_c0_seq2|ZHLZ.comp44152_c0_seq1|ZHLZ.comp45188_c0_seq1|ZHLZ.comp45853_c0_seq1|ZHLZ.comp47668_c0_seq1|ZHLZ.comp49234_c0_seq1|ZHLZ.comp50733_c1_seq1|ZHLZ.comp52433_c1_seq1|ZHLZ.comp54548_c0_seq1|ZHLZ.comp54988_c0_seq1|ZHLZ.comp56130_c0_seq1|ZHLZ.comp57119_c7_seq1|ZHLZ.comp57119_c8_seq1|ZHLZ.com…	http://www.genome.jp/kegg-bin/show_pathway?ko05010
	KEGG PATHWAY	ko05012	15	137	1.117e-07	3.1623e-06	ZHLZ.comp27213_c0_seq1|ZHLZ.comp35350_c0_seq1|ZHLZ.comp35493_c0_seq1|ZHLZ.comp35591_c0_seq1|ZHLZ.comp43727_c0_seq2|ZHLZ.comp45188_c0_seq1|ZHLZ.comp47668_c0_seq1|ZHLZ.comp49234_c0_seq1|ZHLZ.comp50733_c1_seq1|ZHLZ.comp52433_c1_seq1|ZHLZ.comp54548_c0_seq1|ZHLZ.comp54988_c0_seq1|ZHLZ.comp58150_c3_seq1|ZHLZ.comp59476_c0_seq1|ZHLZ.comp59549_c0_seq1|ZHLZ.comp59820_c0_seq1|	http://www.genome.jp/kegg-bin/show_pathway?ko05012
	KEGG PATHWAY	ko05014	3	54	0.08853	0.386736	ZHLZ.comp35493_c0_seq1|ZHLZ.comp44583_c0_seq1|ZHLZ.comp59437_c0_seq1|	http://www.genome.jp/kegg-bin/show_pathway?ko05014
	KEGG PATHWAY	ko05016	17	153	1.357e-08	5.63155e-07	ZHLZ.comp26946_c0_seq1|ZHLZ.comp27213_c0_seq1|ZHLZ.comp35350_c0_seq1|ZHLZ.comp35493_c0_seq1|ZHLZ.comp35591_c0_seq1|ZHLZ.comp43727_c0_seq2|ZHLZ.comp44583_c0_seq1|ZHLZ.comp45188_c0_seq1|ZHLZ.comp47668_c0_seq1|ZHLZ.comp49234_c0_seq1|ZHLZ.comp50733_c1_seq1|ZHLZ.comp52433_c1_seq1|ZHLZ.comp54548_c0_seq1|ZHLZ.comp54988_c0_seq1|ZHLZ.comp58150_c3_seq1|ZHLZ.comp59476_c0_seq1|ZHLZ.comp59549_c0_seq1|ZHLZ.com…	http://www.genome.jp/kegg-bin/show_pathway?ko05016
	KEGG PATHWAY	ko05020	1	34	0.4873	0.9999	ZHLZ.comp44583_c0_seq1|	http://www.genome.jp/kegg-bin/show_pathway?ko05020
	KEGG PATHWAY	ko05031	1	56	0.9999	0.9999	ZHLZ.comp44152_c0_seq1|ZHLZ.comp56130_c0_seq1|ZHLZ.comp57119_c7_seq1|ZHLZ.comp57119_c8_seq1|ZHLZ.comp63264_c0_seq1|	http://www.genome.jp/kegg-bin/show_pathway?ko05031
	KEGG PATHWAY	ko05034	2	95	0.708	0.9999	ZHLZ.comp44152_c0_seq1|ZHLZ.comp56130_c0_seq1|ZHLZ.comp57119_c7_seq1|ZHLZ.comp57119_c8_seq1|ZHLZ.comp59503_c0_seq1|ZHLZ.comp63264_c0_seq1|	http://www.genome.jp/kegg-bin/show_pathway?ko05034
	KEGG PATHWAY	ko05100	1	74	0.9999	0.9999	ZHLZ.comp45601_c0_seq1|	http://www.genome.jp/kegg-bin/show_pathway?ko05100
	KEGG PATHWAY	ko05110	4	58	0.02679	0.151607	ZHLZ.comp35488_c0_seq1|ZHLZ.comp45601_c0_seq1|ZHLZ.comp49501_c0_seq1|ZHLZ.comp59789_c0_seq1|	http://www.genome.jp/kegg-bin/show_pathway?ko05110
	KEGG PATHWAY	ko05111	1	116	0.7301	0.9999	ZHLZ.comp47868_c0_seq1|	http://www.genome.jp/kegg-bin/show_pathway?ko05111
	KEGG PATHWAY	ko05120	1	98	0.9999	0.9999	ZHLZ.comp49501_c0_seq1|	http://www.genome.jp/kegg-bin/show_pathway?ko05120
	KEGG PATHWAY	ko05130	1	45	0.5869	0.9999	ZHLZ.comp45601_c0_seq1|	http://www.genome.jp/kegg-bin/show_pathway?ko05130
	KEGG PATHWAY	ko05131	1	66	0.9999	0.9999	ZHLZ.comp45601_c0_seq1|	http://www.genome.jp/kegg-bin/show_pathway?ko05131
	KEGG PATHWAY	ko05132	1	87	0.9999	0.9999	ZHLZ.comp45601_c0_seq1|	http://www.genome.jp/kegg-bin/show_pathway?ko05132
	KEGG PATHWAY	ko05133	1	90	0.9999	0.9999	ZHLZ.comp44152_c0_seq1|ZHLZ.comp56130_c0_seq1|ZHLZ.comp57119_c7_seq1|ZHLZ.comp57119_c8_seq1|ZHLZ.comp63264_c0_seq1|	http://www.genome.jp/kegg-bin/show_pathway?ko05133
	KEGG PATHWAY	ko05134	4	71	0.0504	0.256114	ZHLZ.comp35493_c0_seq1|ZHLZ.comp43419_c0_seq1|ZHLZ.comp45931_c1_seq1|ZHLZ.comp53886_c0_seq1|ZHLZ.comp58305_c1_seq3|	http://www.genome.jp/kegg-bin/show_pathway?ko05134
	KEGG PATHWAY	ko05145	2	98	0.716	0.9999	ZHLZ.comp35493_c0_seq1|ZHLZ.comp45931_c1_seq1|	http://www.genome.jp/kegg-bin/show_pathway?ko05145
	KEGG PATHWAY	ko05152	3	141	0.7559	0.9999	ZHLZ.comp35493_c0_seq1|ZHLZ.comp44152_c0_seq1|ZHLZ.comp49001_c0_seq2|ZHLZ.comp49001_c1_seq1|ZHLZ.comp56130_c0_seq1|ZHLZ.comp57119_c7_seq1|ZHLZ.comp57119_c8_seq1|ZHLZ.comp63264_c0_seq1|	http://www.genome.jp/kegg-bin/show_pathway?ko05152
	KEGG PATHWAY	ko05161	1	113	0.7284	0.9999	ZHLZ.comp35493_c0_seq1|	http://www.genome.jp/kegg-bin/show_pathway?ko05161
	KEGG PATHWAY	ko05162	1	114	0.7289	0.9999	ZHLZ.comp45931_c1_seq1|	http://www.genome.jp/kegg-bin/show_pathway?ko05162
	KEGG PATHWAY	ko05164	4	128	0.3199	0.875331	ZHLZ.comp35493_c0_seq1|ZHLZ.comp45601_c0_seq1|ZHLZ.comp45931_c1_seq1|ZHLZ.comp48084_c0_seq1|	http://www.genome.jp/kegg-bin/show_pathway?ko05164
	KEGG PATHWAY	ko05165	3	232	0.6338	0.9999	ZHLZ.comp36082_c1_seq1|ZHLZ.comp52668_c0_seq1|ZHLZ.comp56124_c0_seq1|ZHLZ.comp56128_c0_seq1|ZHLZ.comp59946_c0_seq1|	http://www.genome.jp/kegg-bin/show_pathway?ko05165
	KEGG PATHWAY	ko05166	4	218	0.9999	0.9999	ZHLZ.comp48084_c0_seq1|ZHLZ.comp54928_c0_seq1|ZHLZ.comp58150_c3_seq1|ZHLZ.comp59476_c0_seq1|	http://www.genome.jp/kegg-bin/show_pathway?ko05166
	KEGG PATHWAY	ko05167	1	161	0.3804	0.919608	ZHLZ.comp35493_c0_seq1|	http://www.genome.jp/kegg-bin/show_pathway?ko05167
	KEGG PATHWAY	ko05168	1	148	0.5378	0.9999	ZHLZ.comp35493_c0_seq1|	http://www.genome.jp/kegg-bin/show_pathway?ko05168
	KEGG PATHWAY	ko05169	1	168	0.3867	0.922249	ZHLZ.comp45931_c1_seq1|	http://www.genome.jp/kegg-bin/show_pathway?ko05169
	KEGG PATHWAY	ko05200	1	344	0.0163	0.112742	ZHLZ.comp35493_c0_seq1|	http://www.genome.jp/kegg-bin/show_pathway?ko05200
	KEGG PATHWAY	ko05203	3	173	0.9999	0.9999	ZHLZ.comp36082_c1_seq1|ZHLZ.comp52668_c0_seq1|ZHLZ.comp54928_c0_seq1|ZHLZ.comp56128_c0_seq1|ZHLZ.comp59503_c0_seq1|	http://www.genome.jp/kegg-bin/show_pathway?ko05203
	KEGG PATHWAY	ko05204	2	136	0.9999	0.9999	ZHLZ.comp27514_c0_seq1|ZHLZ.comp35384_c0_seq1|ZHLZ.comp41023_c0_seq1|ZHLZ.comp45310_c1_seq1|ZHLZ.comp45488_c0_seq1|ZHLZ.comp47918_c0_seq1|ZHLZ.comp54113_c0_seq1|	http://www.genome.jp/kegg-bin/show_pathway?ko05204
	KEGG PATHWAY	ko05205	1	170	0.3889	0.922249	ZHLZ.comp45601_c0_seq1|	http://www.genome.jp/kegg-bin/show_pathway?ko05205
	KEGG PATHWAY	ko05206	1	233	0.141	0.548578	ZHLZ.comp56603_c3_seq1|ZHLZ.comp58026_c0_seq1|ZHLZ.comp58288_c0_seq1|	http://www.genome.jp/kegg-bin/show_pathway?ko05206
	KEGG PATHWAY	ko05210	1	60	0.9999	0.9999	ZHLZ.comp35493_c0_seq1|	http://www.genome.jp/kegg-bin/show_pathway?ko05210
	KEGG PATHWAY	ko05214	1	57	0.9999	0.9999	ZHLZ.comp44152_c0_seq1|ZHLZ.comp56130_c0_seq1|ZHLZ.comp57119_c7_seq1|ZHLZ.comp57119_c8_seq1|ZHLZ.comp63264_c0_seq1|	http://www.genome.jp/kegg-bin/show_pathway?ko05214
	KEGG PATHWAY	ko05222	1	78	0.9999	0.9999	ZHLZ.comp35493_c0_seq1|	http://www.genome.jp/kegg-bin/show_pathway?ko05222
	KEGG PATHWAY	ko05230	5	84	0.02469	0.142972	ZHLZ.comp26910_c0_seq1|ZHLZ.comp27189_c0_seq1|ZHLZ.comp36082_c1_seq1|ZHLZ.comp46348_c1_seq1|ZHLZ.comp46945_c0_seq1|ZHLZ.comp52668_c0_seq1|ZHLZ.comp54484_c2_seq1|ZHLZ.comp56128_c0_seq1|	http://www.genome.jp/kegg-bin/show_pathway?ko05230
	KEGG PATHWAY	ko05231	1	73	0.9999	0.9999	ZHLZ.comp36137_c0_seq1|	http://www.genome.jp/kegg-bin/show_pathway?ko05231
	KEGG PATHWAY	ko05322	1	49	0.6181	0.9999	ZHLZ.comp59503_c0_seq1|	http://www.genome.jp/kegg-bin/show_pathway?ko05322
	KEGG PATHWAY	ko05323	1	70	0.9999	0.9999	ZHLZ.comp49501_c0_seq1|	http://www.genome.jp/kegg-bin/show_pathway?ko05323
	KEGG PATHWAY	ko05410	2	79	0.6676	0.9999	ZHLZ.comp35701_c0_seq1|ZHLZ.comp45601_c0_seq1|	http://www.genome.jp/kegg-bin/show_pathway?ko05410
	KEGG PATHWAY	ko05412	1	68	0.9999	0.9999	ZHLZ.comp45601_c0_seq1|	http://www.genome.jp/kegg-bin/show_pathway?ko05412
	KEGG PATHWAY	ko05414	1	87	0.9999	0.9999	ZHLZ.comp45601_c0_seq1|	http://www.genome.jp/kegg-bin/show_pathway?ko05414
	KEGG PATHWAY	ko05416	2	38	0.1691	0.634393	ZHLZ.comp35493_c0_seq1|ZHLZ.comp45601_c0_seq1|	http://www.genome.jp/kegg-bin/show_pathway?ko05416
	KEGG PATHWAY	ko05418	5	107	0.05926	0.295115	ZHLZ.comp27514_c0_seq1|ZHLZ.comp35384_c0_seq1|ZHLZ.comp35701_c0_seq1|ZHLZ.comp41023_c0_seq1|ZHLZ.comp44152_c0_seq1|ZHLZ.comp45310_c1_seq1|ZHLZ.comp45601_c0_seq1|ZHLZ.comp47918_c0_seq1|ZHLZ.comp54113_c0_seq1|ZHLZ.comp54786_c1_seq1|ZHLZ.comp56130_c0_seq1|ZHLZ.comp57119_c7_seq1|ZHLZ.comp57119_c8_seq1|ZHLZ.comp63264_c0_seq1|	http://www.genome.jp/kegg-bin/show_pathway?ko05418
	KEGG PATHWAY	ko00010	13	131	6.509e-05	0.00135387	ZHLZ.comp27189_c0_seq1|ZHLZ.comp35381_c0_seq1|ZHLZ.comp35702_c0_seq1|ZHLZ.comp40126_c0_seq1|ZHLZ.comp40126_c1_seq1|ZHLZ.comp40126_c2_seq1|ZHLZ.comp45488_c0_seq1|ZHLZ.comp45546_c0_seq1|ZHLZ.comp46348_c1_seq1|ZHLZ.comp46620_c1_seq1|ZHLZ.comp48310_c1_seq1|ZHLZ.comp49635_c0_seq1|ZHLZ.comp52668_c0_seq1|ZHLZ.comp54484_c2_seq1|ZHLZ.comp55188_c0_seq1|ZHLZ.comp58329_c1_seq1|ZHLZ.comp58329_c1_seq2|ZHLZ.com…	http://www.genome.jp/kegg-bin/show_pathway?ko00010
	KEGG PATHWAY	ko00020	9	78	0.0002682	0.00440413	ZHLZ.comp27091_c0_seq1|ZHLZ.comp27189_c0_seq1|ZHLZ.comp27213_c0_seq1|ZHLZ.comp27407_c0_seq1|ZHLZ.comp46348_c1_seq1|ZHLZ.comp46620_c1_seq1|ZHLZ.comp50733_c1_seq1|ZHLZ.comp53042_c0_seq1|ZHLZ.comp54484_c2_seq1|ZHLZ.comp55188_c0_seq1|ZHLZ.comp56613_c0_seq1|ZHLZ.comp59542_c0_seq1|	http://www.genome.jp/kegg-bin/show_pathway?ko00020
	KEGG PATHWAY	ko00030	6	115	0.1345	0.612243	ZHLZ.comp35381_c0_seq1|ZHLZ.comp35725_c0_seq1|ZHLZ.comp46351_c0_seq1|ZHLZ.comp53861_c0_seq1|ZHLZ.comp53861_c1_seq1|ZHLZ.comp56799_c1_seq3|ZHLZ.comp58442_c1_seq1|ZHLZ.comp58735_c1_seq3|ZHLZ.comp59614_c0_seq1|ZHLZ.comp59942_c0_seq1|ZHLZ.comp60133_c0_seq1|	http://www.genome.jp/kegg-bin/show_pathway?ko00030
	KEGG PATHWAY	ko00040	6	126	0.1583	0.658528	ZHLZ.comp27256_c0_seq1|ZHLZ.comp35725_c0_seq1|ZHLZ.comp38685_c0_seq1|ZHLZ.comp44600_c1_seq1|ZHLZ.comp44600_c3_seq1|ZHLZ.comp44896_c0_seq1|ZHLZ.comp47058_c0_seq1|ZHLZ.comp49885_c0_seq1|ZHLZ.comp52054_c0_seq1|ZHLZ.comp52054_c1_seq1|ZHLZ.comp52113_c0_seq3|ZHLZ.comp52552_c1_seq1|ZHLZ.comp54417_c0_seq1|ZHLZ.comp56605_c0_seq5|ZHLZ.comp56605_c1_seq1|ZHLZ.comp56605_c2_seq1|ZHLZ.comp57143_c0_seq1|ZHLZ.com…	http://www.genome.jp/kegg-bin/show_pathway?ko00040
	KEGG PATHWAY	ko00051	5	163	0.6296	0.9999	ZHLZ.comp35381_c0_seq1|ZHLZ.comp35654_c0_seq1|ZHLZ.comp41949_c3_seq1|ZHLZ.comp44096_c0_seq1|ZHLZ.comp45546_c0_seq1|ZHLZ.comp48766_c0_seq1|ZHLZ.comp53081_c0_seq1|ZHLZ.comp59614_c0_seq1|	http://www.genome.jp/kegg-bin/show_pathway?ko00051
	KEGG PATHWAY	ko00052	4	124	0.579	0.9999	ZHLZ.comp53276_c0_seq1|ZHLZ.comp55762_c0_seq1|ZHLZ.comp55762_c0_seq2|ZHLZ.comp58378_c1_seq16|ZHLZ.comp58510_c0_seq1|ZHLZ.comp60133_c0_seq1|	http://www.genome.jp/kegg-bin/show_pathway?ko00052
	KEGG PATHWAY	ko00053	4	94	0.3247	0.939284	ZHLZ.comp35702_c0_seq1|ZHLZ.comp49114_c0_seq1|ZHLZ.comp49213_c0_seq1|ZHLZ.comp49635_c0_seq1|ZHLZ.comp52113_c0_seq3|ZHLZ.comp59450_c1_seq1|	http://www.genome.jp/kegg-bin/show_pathway?ko00053
	KEGG PATHWAY	ko00061	7	84	0.007857	0.0685187	ZHLZ.comp27781_c0_seq1|ZHLZ.comp43654_c0_seq1|ZHLZ.comp44087_c0_seq2|ZHLZ.comp48345_c1_seq1|ZHLZ.comp50138_c0_seq1|ZHLZ.comp54400_c0_seq1|ZHLZ.comp55471_c0_seq1|ZHLZ.comp59648_c0_seq1|ZHLZ.comp59692_c0_seq1|	http://www.genome.jp/kegg-bin/show_pathway?ko00061
	KEGG PATHWAY	ko00062	5	64	0.02952	0.200223	ZHLZ.comp26923_c0_seq1|ZHLZ.comp27007_c0_seq1|ZHLZ.comp45514_c0_seq1|ZHLZ.comp48801_c0_seq1|ZHLZ.comp49315_c0_seq1|ZHLZ.comp55945_c1_seq1|ZHLZ.comp55945_c1_seq2|ZHLZ.comp57955_c0_seq1|ZHLZ.comp58384_c0_seq1|ZHLZ.comp58561_c2_seq2|	http://www.genome.jp/kegg-bin/show_pathway?ko00062
	KEGG PATHWAY	ko00071	8	105	0.007906	0.0685187	ZHLZ.comp35702_c0_seq1|ZHLZ.comp43654_c0_seq1|ZHLZ.comp44087_c0_seq2|ZHLZ.comp45488_c0_seq1|ZHLZ.comp48310_c1_seq1|ZHLZ.comp49635_c0_seq1|ZHLZ.comp50138_c0_seq1|ZHLZ.comp56608_c0_seq2|ZHLZ.comp58329_c1_seq1|ZHLZ.comp58329_c1_seq2|ZHLZ.comp58329_c1_seq3|ZHLZ.comp58406_c1_seq1|ZHLZ.comp58406_c3_seq2|ZHLZ.comp58718_c0_seq1|ZHLZ.comp58913_c0_seq1|	http://www.genome.jp/kegg-bin/show_pathway?ko00071
	KEGG PATHWAY	ko00072	1	15	0.3363	0.939284	ZHLZ.comp53936_c0_seq1|	http://www.genome.jp/kegg-bin/show_pathway?ko00072
	KEGG PATHWAY	ko00073	4	42	0.0264	0.18304	ZHLZ.comp35736_c0_seq1|ZHLZ.comp35912_c0_seq1|ZHLZ.comp48839_c1_seq1|ZHLZ.comp48839_c2_seq1|ZHLZ.comp57069_c0_seq4|ZHLZ.comp58056_c0_seq2|	http://www.genome.jp/kegg-bin/show_pathway?ko00073
	KEGG PATHWAY	ko00100	2	82	0.9999	0.9999	ZHLZ.comp48527_c0_seq1|ZHLZ.comp52841_c1_seq1|	http://www.genome.jp/kegg-bin/show_pathway?ko00100
	KEGG PATHWAY	ko00130	6	147	0.2975	0.8925	ZHLZ.comp27061_c0_seq1|ZHLZ.comp27061_c1_seq1|ZHLZ.comp27255_c0_seq1|ZHLZ.comp27255_c1_seq1|ZHLZ.comp27372_c0_seq1|ZHLZ.comp35875_c0_seq1|ZHLZ.comp47866_c0_seq1|ZHLZ.comp49194_c0_seq1|ZHLZ.comp50520_c0_seq2|ZHLZ.comp51076_c0_seq1|ZHLZ.comp54051_c0_seq1|	http://www.genome.jp/kegg-bin/show_pathway?ko00130
	KEGG PATHWAY	ko00140	1	147	0.1928	0.707689	ZHLZ.comp55945_c1_seq1|ZHLZ.comp55945_c1_seq2|	http://www.genome.jp/kegg-bin/show_pathway?ko00140
	KEGG PATHWAY	ko00190	20	232	7.554e-06	0.000196404	ZHLZ.comp27009_c0_seq1|ZHLZ.comp27213_c0_seq1|ZHLZ.comp35350_c0_seq1|ZHLZ.comp35641_c0_seq1|ZHLZ.comp47499_c0_seq1|ZHLZ.comp47668_c0_seq1|ZHLZ.comp49234_c0_seq1|ZHLZ.comp49352_c2_seq1|ZHLZ.comp49352_c3_seq1|ZHLZ.comp49352_c4_seq1|ZHLZ.comp49501_c0_seq1|ZHLZ.comp50733_c1_seq1|ZHLZ.comp52600_c0_seq1|ZHLZ.comp53293_c0_seq1|ZHLZ.comp54548_c0_seq1|ZHLZ.comp54988_c0_seq1|ZHLZ.comp58172_c1_seq3|ZHLZ.com…	http://www.genome.jp/kegg-bin/show_pathway?ko00190
	KEGG PATHWAY	ko00195	13	75	1.186e-07	9.2508e-06	ZHLZ.comp26928_c0_seq1|ZHLZ.comp27133_c1_seq1|ZHLZ.comp35504_c0_seq1|ZHLZ.comp35609_c0_seq1|ZHLZ.comp46106_c0_seq1|ZHLZ.comp50068_c0_seq1|ZHLZ.comp55287_c0_seq2|ZHLZ.comp59454_c0_seq1|ZHLZ.comp59475_c0_seq1|ZHLZ.comp59486_c0_seq1|ZHLZ.comp59672_c0_seq1|ZHLZ.comp60035_c0_seq1|ZHLZ.comp66504_c0_seq1|	http://www.genome.jp/kegg-bin/show_pathway?ko00195
	KEGG PATHWAY	ko00196	5	43	0.005926	0.0577785	ZHLZ.comp52437_c0_seq1|ZHLZ.comp52587_c0_seq1|ZHLZ.comp59522_c0_seq1|ZHLZ.comp59558_c0_seq1|ZHLZ.comp61770_c0_seq1|	http://www.genome.jp/kegg-bin/show_pathway?ko00196
	KEGG PATHWAY	ko00220	1	79	0.7263	0.9999	ZHLZ.comp49188_c0_seq1|	http://www.genome.jp/kegg-bin/show_pathway?ko00220
	KEGG PATHWAY	ko00230	7	368	0.5108	0.9999	ZHLZ.comp27248_c0_seq1|ZHLZ.comp34728_c0_seq1|ZHLZ.comp35454_c0_seq1|ZHLZ.comp52668_c0_seq1|ZHLZ.comp55009_c0_seq1|ZHLZ.comp56140_c0_seq1|ZHLZ.comp60133_c0_seq1|ZHLZ.comp60798_c0_seq1|	http://www.genome.jp/kegg-bin/show_pathway?ko00230
	KEGG PATHWAY	ko00240	4	242	0.4226	0.9999	ZHLZ.comp27161_c0_seq1|ZHLZ.comp35454_c0_seq1|ZHLZ.comp55009_c0_seq1|ZHLZ.comp58468_c6_seq3|ZHLZ.comp60798_c0_seq1|	http://www.genome.jp/kegg-bin/show_pathway?ko00240
	KEGG PATHWAY	ko00250	2	96	0.9999	0.9999	ZHLZ.comp34728_c0_seq1|ZHLZ.comp48489_c0_seq1|	http://www.genome.jp/kegg-bin/show_pathway?ko00250
	KEGG PATHWAY	ko00260	4	145	0.7981	0.9999	ZHLZ.comp27536_c0_seq1|ZHLZ.comp49702_c0_seq1|ZHLZ.comp52412_c0_seq1|ZHLZ.comp55188_c0_seq1|	http://www.genome.jp/kegg-bin/show_pathway?ko00260
	KEGG PATHWAY	ko00261	1	68	0.9999	0.9999	ZHLZ.comp52412_c0_seq1|	http://www.genome.jp/kegg-bin/show_pathway?ko00261
	KEGG PATHWAY	ko00270	10	162	0.01339	0.10712	CL2317Contig1|ZHLZ.comp35516_c0_seq1|ZHLZ.comp35516_c1_seq1|ZHLZ.comp35516_c2_seq1|ZHLZ.comp35521_c0_seq1|ZHLZ.comp35746_c0_seq1|ZHLZ.comp49194_c0_seq1|ZHLZ.comp49915_c0_seq1|ZHLZ.comp49915_c1_seq1|ZHLZ.comp52412_c0_seq1|ZHLZ.comp57462_c0_seq2|ZHLZ.comp59690_c0_seq1|ZHLZ.comp59797_c0_seq1|	http://www.genome.jp/kegg-bin/show_pathway?ko00270
	KEGG PATHWAY	ko00280	6	111	0.1282	0.612243	ZHLZ.comp35464_c0_seq1|ZHLZ.comp35702_c0_seq1|ZHLZ.comp49635_c0_seq1|ZHLZ.comp53936_c0_seq1|ZHLZ.comp55188_c0_seq1|ZHLZ.comp55230_c0_seq1|ZHLZ.comp58718_c0_seq1|	http://www.genome.jp/kegg-bin/show_pathway?ko00280
	KEGG PATHWAY	ko00300	1	81	0.7274	0.9999	ZHLZ.comp52412_c0_seq1|	http://www.genome.jp/kegg-bin/show_pathway?ko00300
	KEGG PATHWAY	ko00310	1	129	0.2692	0.848388	ZHLZ.comp35702_c0_seq1|ZHLZ.comp49635_c0_seq1|	http://www.genome.jp/kegg-bin/show_pathway?ko00310
	KEGG PATHWAY	ko00330	3	177	0.6362	0.9999	ZHLZ.comp35702_c0_seq1|ZHLZ.comp35746_c0_seq1|ZHLZ.comp47074_c0_seq1|ZHLZ.comp49635_c0_seq1|	http://www.genome.jp/kegg-bin/show_pathway?ko00330
	KEGG PATHWAY	ko00333	2	39	0.2835	0.88452	ZHLZ.comp55471_c0_seq1|ZHLZ.comp59692_c0_seq1|	http://www.genome.jp/kegg-bin/show_pathway?ko00333
	KEGG PATHWAY	ko00340	1	94	0.5233	0.9999	ZHLZ.comp35702_c0_seq1|ZHLZ.comp49635_c0_seq1|	http://www.genome.jp/kegg-bin/show_pathway?ko00340
	KEGG PATHWAY	ko00350	7	149	0.127	0.612243	ZHLZ.comp27372_c0_seq1|ZHLZ.comp45488_c0_seq1|ZHLZ.comp47117_c0_seq1|ZHLZ.comp48310_c1_seq1|ZHLZ.comp49194_c0_seq1|ZHLZ.comp58329_c1_seq1|ZHLZ.comp58329_c1_seq2|ZHLZ.comp58329_c1_seq3|ZHLZ.comp58406_c1_seq1|ZHLZ.comp58406_c3_seq2|ZHLZ.comp59728_c0_seq1|	http://www.genome.jp/kegg-bin/show_pathway?ko00350
	KEGG PATHWAY	ko00360	6	149	0.3021	0.897669	ZHLZ.comp27061_c0_seq1|ZHLZ.comp27061_c1_seq1|ZHLZ.comp27255_c0_seq1|ZHLZ.comp27255_c1_seq1|ZHLZ.comp27372_c0_seq1|ZHLZ.comp35875_c0_seq1|ZHLZ.comp43211_c0_seq1|ZHLZ.comp43564_c0_seq1|ZHLZ.comp43564_c1_seq1|ZHLZ.comp43564_c2_seq1|ZHLZ.comp43564_c3_seq1|ZHLZ.comp46872_c0_seq1|ZHLZ.comp49194_c0_seq1|ZHLZ.comp51076_c0_seq1|ZHLZ.comp54051_c0_seq1|ZHLZ.comp58732_c7_seq34|ZHLZ.comp59502_c0_seq1|	http://www.genome.jp/kegg-bin/show_pathway?ko00360
	KEGG PATHWAY	ko00361	1	123	0.2675	0.848388	ZHLZ.comp35571_c1_seq1|	http://www.genome.jp/kegg-bin/show_pathway?ko00361
	KEGG PATHWAY	ko00364	1	51	0.9999	0.9999	ZHLZ.comp35571_c1_seq1|	http://www.genome.jp/kegg-bin/show_pathway?ko00364
	KEGG PATHWAY	ko00380	3	150	0.8012	0.9999	ZHLZ.comp35702_c0_seq1|ZHLZ.comp36142_c1_seq1|ZHLZ.comp46736_c0_seq1|ZHLZ.comp49635_c0_seq1|	http://www.genome.jp/kegg-bin/show_pathway?ko00380
	KEGG PATHWAY	ko00400	6	108	0.07324	0.415471	ZHLZ.comp27049_c0_seq1|ZHLZ.comp27539_c0_seq1|ZHLZ.comp36125_c0_seq1|ZHLZ.comp48411_c1_seq1|ZHLZ.comp49194_c0_seq1|ZHLZ.comp53251_c0_seq1|ZHLZ.comp55629_c0_seq1|	http://www.genome.jp/kegg-bin/show_pathway?ko00400
	KEGG PATHWAY	ko00401	1	63	0.9999	0.9999	ZHLZ.comp49194_c0_seq1|	http://www.genome.jp/kegg-bin/show_pathway?ko00401
	KEGG PATHWAY	ko00410	5	76	0.0551	0.324362	ZHLZ.comp27161_c0_seq1|ZHLZ.comp35464_c0_seq1|ZHLZ.comp35702_c0_seq1|ZHLZ.comp48489_c0_seq1|ZHLZ.comp49635_c0_seq1|ZHLZ.comp58718_c0_seq1|	http://www.genome.jp/kegg-bin/show_pathway?ko00410
	KEGG PATHWAY	ko00430	2	47	0.3628	0.984292	ZHLZ.comp30176_c0_seq1|ZHLZ.comp48489_c0_seq1|	http://www.genome.jp/kegg-bin/show_pathway?ko00430
	KEGG PATHWAY	ko00450	2	56	0.6638	0.9999	ZHLZ.comp35521_c0_seq1|ZHLZ.comp57462_c0_seq2|	http://www.genome.jp/kegg-bin/show_pathway?ko00450
	KEGG PATHWAY	ko00460	4	80	0.1705	0.679291	ZHLZ.comp26845_c0_seq1|ZHLZ.comp30176_c0_seq1|ZHLZ.comp36142_c0_seq1|ZHLZ.comp43729_c0_seq1|ZHLZ.comp54272_c0_seq1|ZHLZ.comp54462_c0_seq1|ZHLZ.comp54462_c1_seq1|ZHLZ.comp54462_c1_seq2|ZHLZ.comp58678_c0_seq4|	http://www.genome.jp/kegg-bin/show_pathway?ko00460
	KEGG PATHWAY	ko00480	4	82	0.2864	0.884721	ZHLZ.comp30176_c0_seq1|ZHLZ.comp35384_c0_seq1|ZHLZ.comp35980_c0_seq1|ZHLZ.comp41023_c0_seq1|ZHLZ.comp45310_c1_seq1|ZHLZ.comp45740_c0_seq1|ZHLZ.comp45903_c0_seq1|ZHLZ.comp49114_c0_seq1|ZHLZ.comp49125_c2_seq1|ZHLZ.comp49213_c0_seq1|ZHLZ.comp51834_c0_seq1|ZHLZ.comp55275_c1_seq1|ZHLZ.comp59593_c0_seq1|ZHLZ.comp59767_c0_seq1|	http://www.genome.jp/kegg-bin/show_pathway?ko00480
	KEGG PATHWAY	ko00500	14	147	5.488e-05	0.00122304	ZHLZ.comp26845_c0_seq1|ZHLZ.comp34958_c0_seq1|ZHLZ.comp36142_c0_seq1|ZHLZ.comp41949_c3_seq1|ZHLZ.comp43729_c0_seq1|ZHLZ.comp47956_c0_seq1|ZHLZ.comp47956_c1_seq1|ZHLZ.comp48766_c0_seq1|ZHLZ.comp50582_c0_seq1|ZHLZ.comp52460_c0_seq1|ZHLZ.comp52545_c0_seq1|ZHLZ.comp53061_c1_seq1|ZHLZ.comp53081_c0_seq1|ZHLZ.comp53234_c1_seq1|ZHLZ.comp53234_c1_seq2|ZHLZ.comp53234_c1_seq3|ZHLZ.comp53276_c0_seq1|ZHLZ.com…	http://www.genome.jp/kegg-bin/show_pathway?ko00500
	KEGG PATHWAY	ko00510	1	80	0.7268	0.9999	ZHLZ.comp35734_c0_seq1|	http://www.genome.jp/kegg-bin/show_pathway?ko00510
	KEGG PATHWAY	ko00511	1	20	0.421	0.9999	ZHLZ.comp51403_c0_seq2|	http://www.genome.jp/kegg-bin/show_pathway?ko00511
	KEGG PATHWAY	ko00513	1	83	0.7289	0.9999	ZHLZ.comp35734_c0_seq1|	http://www.genome.jp/kegg-bin/show_pathway?ko00513
	KEGG PATHWAY	ko00514	1	27	0.5217	0.9999	ZHLZ.comp27320_c0_seq1|	http://www.genome.jp/kegg-bin/show_pathway?ko00514
	KEGG PATHWAY	ko00520	14	260	0.0184	0.14352	ZHLZ.comp26793_c0_seq1|ZHLZ.comp26996_c0_seq1|ZHLZ.comp27233_c0_seq1|ZHLZ.comp41949_c3_seq1|ZHLZ.comp44096_c0_seq1|ZHLZ.comp44918_c0_seq2|ZHLZ.comp48606_c0_seq1|ZHLZ.comp48606_c0_seq2|ZHLZ.comp48766_c0_seq1|ZHLZ.comp48859_c0_seq1|ZHLZ.comp51294_c0_seq1|ZHLZ.comp52113_c0_seq3|ZHLZ.comp52555_c0_seq1|ZHLZ.comp53081_c0_seq1|ZHLZ.comp56463_c0_seq1|ZHLZ.comp56716_c0_seq1|ZHLZ.comp57493_c0_seq1|ZHLZ.com…	http://www.genome.jp/kegg-bin/show_pathway?ko00520
	KEGG PATHWAY	ko00521	1	43	0.9999	0.9999	ZHLZ.comp60133_c0_seq1|	http://www.genome.jp/kegg-bin/show_pathway?ko00521
	KEGG PATHWAY	ko00531	2	43	0.3235	0.939284	ZHLZ.comp48524_c0_seq1|ZHLZ.comp55877_c0_seq1|	http://www.genome.jp/kegg-bin/show_pathway?ko00531
	KEGG PATHWAY	ko00550	1	73	0.9999	0.9999	ZHLZ.comp52228_c0_seq1|	http://www.genome.jp/kegg-bin/show_pathway?ko00550
	KEGG PATHWAY	ko00561	6	114	0.1328	0.612243	ZHLZ.comp26932_c0_seq1|ZHLZ.comp30332_c0_seq1|ZHLZ.comp35702_c0_seq1|ZHLZ.comp44389_c0_seq1|ZHLZ.comp49048_c0_seq1|ZHLZ.comp49635_c0_seq1|ZHLZ.comp51990_c0_seq1|ZHLZ.comp55790_c0_seq1|ZHLZ.comp64075_c0_seq1|	http://www.genome.jp/kegg-bin/show_pathway?ko00561
	KEGG PATHWAY	ko00562	3	113	0.9999	0.9999	ZHLZ.comp45546_c0_seq1|ZHLZ.comp49427_c0_seq1|ZHLZ.comp53141_c0_seq1|ZHLZ.comp53528_c0_seq1|	http://www.genome.jp/kegg-bin/show_pathway?ko00562
	KEGG PATHWAY	ko00564	4	162	0.9999	0.9999	ZHLZ.comp26932_c0_seq1|ZHLZ.comp44389_c0_seq1|ZHLZ.comp51990_c0_seq1|ZHLZ.comp53141_c0_seq1|ZHLZ.comp53528_c0_seq1|ZHLZ.comp55790_c0_seq1|ZHLZ.comp59915_c0_seq1|	http://www.genome.jp/kegg-bin/show_pathway?ko00564
	KEGG PATHWAY	ko00565	1	55	0.9999	0.9999	ZHLZ.comp53141_c0_seq1|ZHLZ.comp53528_c0_seq1|	http://www.genome.jp/kegg-bin/show_pathway?ko00565
	KEGG PATHWAY	ko00590	2	121	0.7747	0.9999	ZHLZ.comp30176_c0_seq1|ZHLZ.comp59767_c0_seq1|	http://www.genome.jp/kegg-bin/show_pathway?ko00590
	KEGG PATHWAY	ko00591	2	54	0.6576	0.9999	ZHLZ.comp43895_c0_seq2|ZHLZ.comp47430_c0_seq1|ZHLZ.comp47430_c1_seq1|ZHLZ.comp56023_c0_seq1|ZHLZ.comp58977_c0_seq1|ZHLZ.comp58977_c1_seq1|	http://www.genome.jp/kegg-bin/show_pathway?ko00591
	KEGG PATHWAY	ko00592	9	66	7.304e-05	0.00142428	ZHLZ.comp35501_c0_seq1|ZHLZ.comp48310_c1_seq1|ZHLZ.comp49790_c0_seq1|ZHLZ.comp53363_c0_seq1|ZHLZ.comp55008_c0_seq1|ZHLZ.comp55606_c0_seq1|ZHLZ.comp56023_c0_seq1|ZHLZ.comp56608_c0_seq2|ZHLZ.comp58406_c1_seq1|ZHLZ.comp58406_c3_seq2|ZHLZ.comp58913_c0_seq1|ZHLZ.comp59606_c0_seq1|	http://www.genome.jp/kegg-bin/show_pathway?ko00592
	KEGG PATHWAY	ko00600	3	67	0.4301	0.9999	ZHLZ.comp47129_c0_seq1|ZHLZ.comp47129_c2_seq1|ZHLZ.comp52466_c0_seq1|ZHLZ.comp53635_c0_seq1|ZHLZ.comp54434_c0_seq1|ZHLZ.comp54434_c1_seq1|	http://www.genome.jp/kegg-bin/show_pathway?ko00600
	KEGG PATHWAY	ko00620	6	128	0.1636	0.66614	ZHLZ.comp27189_c0_seq1|ZHLZ.comp35702_c0_seq1|ZHLZ.comp37284_c1_seq1|ZHLZ.comp46348_c1_seq1|ZHLZ.comp46620_c1_seq1|ZHLZ.comp49635_c0_seq1|ZHLZ.comp52668_c0_seq1|ZHLZ.comp54484_c2_seq1|ZHLZ.comp55188_c0_seq1|ZHLZ.comp57414_c0_seq1|ZHLZ.comp57414_c0_seq4|	http://www.genome.jp/kegg-bin/show_pathway?ko00620
	KEGG PATHWAY	ko00623	1	94	0.5233	0.9999	ZHLZ.comp35571_c1_seq1|	http://www.genome.jp/kegg-bin/show_pathway?ko00623
	KEGG PATHWAY	ko00625	3	73	0.4501	0.9999	ZHLZ.comp35702_c0_seq1|ZHLZ.comp45488_c0_seq1|ZHLZ.comp49635_c0_seq1|ZHLZ.comp58329_c1_seq1|ZHLZ.comp58329_c1_seq2|ZHLZ.comp58329_c1_seq3|	http://www.genome.jp/kegg-bin/show_pathway?ko00625
	KEGG PATHWAY	ko00626	2	90	0.9999	0.9999	ZHLZ.comp45488_c0_seq1|ZHLZ.comp58329_c1_seq1|ZHLZ.comp58329_c1_seq2|ZHLZ.comp58329_c1_seq3|	http://www.genome.jp/kegg-bin/show_pathway?ko00626
	KEGG PATHWAY	ko00630	3	156	0.8021	0.9999	ZHLZ.comp53042_c0_seq1|ZHLZ.comp55188_c0_seq1|ZHLZ.comp59434_c0_seq1|	http://www.genome.jp/kegg-bin/show_pathway?ko00630
	KEGG PATHWAY	ko00640	4	149	0.9999	0.9999	ZHLZ.comp27407_c0_seq1|ZHLZ.comp35464_c0_seq1|ZHLZ.comp55188_c0_seq1|ZHLZ.comp58718_c0_seq1|	http://www.genome.jp/kegg-bin/show_pathway?ko00640
	KEGG PATHWAY	ko00650	2	135	0.5904	0.9999	ZHLZ.comp48489_c0_seq1|ZHLZ.comp53936_c0_seq1|	http://www.genome.jp/kegg-bin/show_pathway?ko00650
	KEGG PATHWAY	ko00680	4	249	0.4251	0.9999	ZHLZ.comp35381_c0_seq1|ZHLZ.comp37284_c1_seq1|ZHLZ.comp45488_c0_seq1|ZHLZ.comp49702_c0_seq1|ZHLZ.comp57414_c0_seq1|ZHLZ.comp57414_c0_seq4|ZHLZ.comp59614_c0_seq1|	http://www.genome.jp/kegg-bin/show_pathway?ko00680
	KEGG PATHWAY	ko00710	6	60	0.005639	0.0567538	ZHLZ.comp35381_c0_seq1|ZHLZ.comp35725_c0_seq1|ZHLZ.comp37284_c1_seq1|ZHLZ.comp45546_c0_seq1|ZHLZ.comp53861_c0_seq1|ZHLZ.comp53861_c1_seq1|ZHLZ.comp56799_c1_seq3|ZHLZ.comp57414_c0_seq1|ZHLZ.comp57414_c0_seq4|ZHLZ.comp58442_c1_seq1|ZHLZ.comp58735_c1_seq3|ZHLZ.comp59434_c0_seq1|ZHLZ.comp59614_c0_seq1|	http://www.genome.jp/kegg-bin/show_pathway?ko00710
	KEGG PATHWAY	ko00720	2	148	0.4447	0.9999	ZHLZ.comp37284_c1_seq1|ZHLZ.comp57414_c0_seq1|ZHLZ.comp57414_c0_seq4|ZHLZ.comp59542_c0_seq1|	http://www.genome.jp/kegg-bin/show_pathway?ko00720
	KEGG PATHWAY	ko00730	2	65	0.6948	0.9999	ZHLZ.comp27248_c0_seq1|ZHLZ.comp56115_c0_seq1|	http://www.genome.jp/kegg-bin/show_pathway?ko00730
	KEGG PATHWAY	ko00740	1	63	0.9999	0.9999	ZHLZ.comp27103_c0_seq1|	http://www.genome.jp/kegg-bin/show_pathway?ko00740
	KEGG PATHWAY	ko00750	2	52	0.6518	0.9999	ZHLZ.comp43706_c0_seq1|ZHLZ.comp49566_c0_seq2|	http://www.genome.jp/kegg-bin/show_pathway?ko00750
	KEGG PATHWAY	ko00760	1	145	0.1917	0.707689	ZHLZ.comp55009_c0_seq1|	http://www.genome.jp/kegg-bin/show_pathway?ko00760
	KEGG PATHWAY	ko00770	1	67	0.9999	0.9999	ZHLZ.comp27161_c0_seq1|	http://www.genome.jp/kegg-bin/show_pathway?ko00770
	KEGG PATHWAY	ko00780	4	52	0.05177	0.31062	ZHLZ.comp27781_c0_seq1|ZHLZ.comp55471_c0_seq1|ZHLZ.comp59648_c0_seq1|ZHLZ.comp59692_c0_seq1|	http://www.genome.jp/kegg-bin/show_pathway?ko00780
	KEGG PATHWAY	ko00790	1	99	0.5267	0.9999	ZHLZ.comp49280_c0_seq1|	http://www.genome.jp/kegg-bin/show_pathway?ko00790
	KEGG PATHWAY	ko00830	2	73	0.7245	0.9999	ZHLZ.comp45488_c0_seq1|ZHLZ.comp58329_c1_seq1|ZHLZ.comp58329_c1_seq2|ZHLZ.comp58329_c1_seq3|	http://www.genome.jp/kegg-bin/show_pathway?ko00830
	KEGG PATHWAY	ko00860	3	263	0.172	0.679291	ZHLZ.comp57620_c1_seq1|ZHLZ.comp58970_c1_seq1|ZHLZ.comp60310_c0_seq1|	http://www.genome.jp/kegg-bin/show_pathway?ko00860
	KEGG PATHWAY	ko00900	13	103	4.894e-06	0.000138812	ZHLZ.comp27339_c0_seq1|ZHLZ.comp35837_c0_seq1|ZHLZ.comp37355_c0_seq1|ZHLZ.comp44095_c0_seq1|ZHLZ.comp44095_c1_seq1|ZHLZ.comp44518_c0_seq1|ZHLZ.comp44788_c0_seq1|ZHLZ.comp48084_c0_seq1|ZHLZ.comp50804_c0_seq1|ZHLZ.comp53936_c0_seq1|ZHLZ.comp56115_c0_seq1|ZHLZ.comp57620_c1_seq1|ZHLZ.comp59540_c0_seq1|ZHLZ.comp59688_c0_seq1|	http://www.genome.jp/kegg-bin/show_pathway?ko00900
	KEGG PATHWAY	ko00901	1	61	0.9999	0.9999	ZHLZ.comp57839_c0_seq6|ZHLZ.comp57839_c0_seq7|	http://www.genome.jp/kegg-bin/show_pathway?ko00901
	KEGG PATHWAY	ko00902	2	84	0.9999	0.9999	ZHLZ.comp55105_c0_seq1|ZHLZ.comp55105_c1_seq1|ZHLZ.comp58816_c1_seq34|	http://www.genome.jp/kegg-bin/show_pathway?ko00902
	KEGG PATHWAY	ko00903	1	77	0.7255	0.9999	ZHLZ.comp35702_c0_seq1|ZHLZ.comp49635_c0_seq1|	http://www.genome.jp/kegg-bin/show_pathway?ko00903
	KEGG PATHWAY	ko00904	3	156	0.8021	0.9999	ZHLZ.comp255567_c0_seq1|ZHLZ.comp51489_c0_seq1|ZHLZ.comp51534_c0_seq1|ZHLZ.comp52510_c0_seq2|	http://www.genome.jp/kegg-bin/show_pathway?ko00904
	KEGG PATHWAY	ko00905	4	41	0.0244	0.173018	ZHLZ.comp170856_c0_seq1|ZHLZ.comp47622_c1_seq1|ZHLZ.comp52102_c1_seq1|ZHLZ.comp59405_c3_seq1|ZHLZ.comp59969_c0_seq1|	http://www.genome.jp/kegg-bin/show_pathway?ko00905
	KEGG PATHWAY	ko00906	3	162	0.8043	0.9999	ZHLZ.comp51734_c0_seq1|ZHLZ.comp53180_c5_seq1|ZHLZ.comp55917_c0_seq1|ZHLZ.comp59016_c0_seq1|	http://www.genome.jp/kegg-bin/show_pathway?ko00906
	KEGG PATHWAY	ko00909	2	160	0.4528	0.9999	ZHLZ.comp27339_c0_seq1|ZHLZ.comp57200_c0_seq1|	http://www.genome.jp/kegg-bin/show_pathway?ko00909
	KEGG PATHWAY	ko00910	1	80	0.7268	0.9999	ZHLZ.comp58000_c5_seq1|	http://www.genome.jp/kegg-bin/show_pathway?ko00910
	KEGG PATHWAY	ko00920	3	132	0.9999	0.9999	ZHLZ.comp35493_c0_seq1|ZHLZ.comp35899_c1_seq1|ZHLZ.comp46712_c0_seq1|ZHLZ.comp46712_c1_seq1|ZHLZ.comp59797_c0_seq1|	http://www.genome.jp/kegg-bin/show_pathway?ko00920
	KEGG PATHWAY	ko00940	16	101	1.688e-08	1.75552e-06	CL219Contig1|ZHLZ.comp26845_c0_seq1|ZHLZ.comp27061_c0_seq1|ZHLZ.comp27061_c1_seq1|ZHLZ.comp27255_c0_seq1|ZHLZ.comp27255_c1_seq1|ZHLZ.comp35408_c0_seq1|ZHLZ.comp35478_c0_seq1|ZHLZ.comp35603_c0_seq1|ZHLZ.comp35875_c0_seq1|ZHLZ.comp36142_c0_seq1|ZHLZ.comp43211_c0_seq1|ZHLZ.comp43564_c0_seq1|ZHLZ.comp43564_c1_seq1|ZHLZ.comp43564_c2_seq1|ZHLZ.comp43564_c3_seq1|ZHLZ.comp43729_c0_seq1|ZHLZ.comp46872_c0_…	http://www.genome.jp/kegg-bin/show_pathway?ko00940
	KEGG PATHWAY	ko00941	7	91	0.01193	0.0984442	ZHLZ.comp27061_c0_seq1|ZHLZ.comp27061_c1_seq1|ZHLZ.comp27950_c0_seq1|ZHLZ.comp35478_c0_seq1|ZHLZ.comp43211_c0_seq1|ZHLZ.comp46872_c0_seq1|ZHLZ.comp53323_c0_seq1|ZHLZ.comp54051_c0_seq1|ZHLZ.comp56809_c5_seq1|ZHLZ.comp58732_c7_seq34|ZHLZ.comp60856_c0_seq1|	http://www.genome.jp/kegg-bin/show_pathway?ko00941
	KEGG PATHWAY	ko00944	1	62	0.9999	0.9999	ZHLZ.comp53323_c0_seq1|	http://www.genome.jp/kegg-bin/show_pathway?ko00944
	KEGG PATHWAY	ko00945	4	38	0.01895	0.144205	ZHLZ.comp27061_c0_seq1|ZHLZ.comp27061_c1_seq1|ZHLZ.comp35478_c0_seq1|ZHLZ.comp43211_c0_seq1|ZHLZ.comp46872_c0_seq1|ZHLZ.comp54051_c0_seq1|ZHLZ.comp58732_c7_seq34|ZHLZ.comp60856_c0_seq1|	http://www.genome.jp/kegg-bin/show_pathway?ko00945
	KEGG PATHWAY	ko00950	2	139	0.5929	0.9999	ZHLZ.comp47117_c0_seq1|ZHLZ.comp49194_c0_seq1|	http://www.genome.jp/kegg-bin/show_pathway?ko00950
	KEGG PATHWAY	ko00960	1	95	0.5237	0.9999	ZHLZ.comp49194_c0_seq1|	http://www.genome.jp/kegg-bin/show_pathway?ko00960
	KEGG PATHWAY	ko00965	1	32	0.5828	0.9999	ZHLZ.comp47117_c0_seq1|	http://www.genome.jp/kegg-bin/show_pathway?ko00965
	KEGG PATHWAY	ko00980	3	155	0.8019	0.9999	ZHLZ.comp35384_c0_seq1|ZHLZ.comp35980_c0_seq1|ZHLZ.comp41023_c0_seq1|ZHLZ.comp45310_c1_seq1|ZHLZ.comp45488_c0_seq1|ZHLZ.comp45740_c0_seq1|ZHLZ.comp45903_c0_seq1|ZHLZ.comp49125_c2_seq1|ZHLZ.comp51834_c0_seq1|ZHLZ.comp55275_c1_seq1|ZHLZ.comp58329_c1_seq1|ZHLZ.comp58329_c1_seq2|ZHLZ.comp58329_c1_seq3|ZHLZ.comp59593_c0_seq1|	http://www.genome.jp/kegg-bin/show_pathway?ko00980
	KEGG PATHWAY	ko00981	1	44	0.9999	0.9999	ZHLZ.comp35702_c0_seq1|ZHLZ.comp49635_c0_seq1|	http://www.genome.jp/kegg-bin/show_pathway?ko00981
	KEGG PATHWAY	ko00982	4	125	0.5819	0.9999	ZHLZ.comp27757_c0_seq1|ZHLZ.comp35384_c0_seq1|ZHLZ.comp35980_c0_seq1|ZHLZ.comp41023_c0_seq1|ZHLZ.comp45310_c1_seq1|ZHLZ.comp45488_c0_seq1|ZHLZ.comp45740_c0_seq1|ZHLZ.comp45903_c0_seq1|ZHLZ.comp49125_c2_seq1|ZHLZ.comp51834_c0_seq1|ZHLZ.comp55275_c1_seq1|ZHLZ.comp58329_c1_seq1|ZHLZ.comp58329_c1_seq2|ZHLZ.comp58329_c1_seq3|ZHLZ.comp58731_c0_seq1|ZHLZ.comp59593_c0_seq1|	http://www.genome.jp/kegg-bin/show_pathway?ko00982
	KEGG PATHWAY	ko00983	1	72	0.9999	0.9999	ZHLZ.comp27161_c0_seq1|	http://www.genome.jp/kegg-bin/show_pathway?ko00983
	KEGG PATHWAY	ko01040	5	82	0.0715	0.413111	ZHLZ.comp54400_c0_seq1|ZHLZ.comp55471_c0_seq1|ZHLZ.comp55945_c1_seq1|ZHLZ.comp55945_c1_seq2|ZHLZ.comp58913_c0_seq1|ZHLZ.comp59684_c0_seq1|	http://www.genome.jp/kegg-bin/show_pathway?ko01040
	KEGG PATHWAY	ko01051	1	65	0.9999	0.9999	ZHLZ.comp53861_c0_seq1|ZHLZ.comp53861_c1_seq1|ZHLZ.comp56799_c1_seq3|ZHLZ.comp58442_c1_seq1|ZHLZ.comp58735_c1_seq3|	http://www.genome.jp/kegg-bin/show_pathway?ko01051
	KEGG PATHWAY	ko01100	178	4666	9.18e-05	0.0016848	CL219Contig1|CL2317Contig1|ZHLZ.comp170856_c0_seq1|ZHLZ.comp26793_c0_seq1|ZHLZ.comp26845_c0_seq1|ZHLZ.comp26923_c0_seq1|ZHLZ.comp26928_c0_seq1|ZHLZ.comp26932_c0_seq1|ZHLZ.comp26996_c0_seq1|ZHLZ.comp27007_c0_seq1|ZHLZ.comp27009_c0_seq1|ZHLZ.comp27049_c0_seq1|ZHLZ.comp27061_c0_seq1|ZHLZ.comp27061_c1_seq1|ZHLZ.comp27091_c0_seq1|ZHLZ.comp27103_c0_seq1|ZHLZ.comp27161_c0_seq1|ZHLZ.comp27189_c0_seq1|ZHL…	http://www.genome.jp/kegg-bin/show_pathway?ko01100
	KEGG PATHWAY	ko01110	103	2131	2.611e-07	1.35772e-05	CL219Contig1|ZHLZ.comp170856_c0_seq1|ZHLZ.comp26845_c0_seq1|ZHLZ.comp26932_c0_seq1|ZHLZ.comp27049_c0_seq1|ZHLZ.comp27061_c0_seq1|ZHLZ.comp27061_c1_seq1|ZHLZ.comp27081_c0_seq1|ZHLZ.comp27091_c0_seq1|ZHLZ.comp27189_c0_seq1|ZHLZ.comp27213_c0_seq1|ZHLZ.comp27248_c0_seq1|ZHLZ.comp27255_c0_seq1|ZHLZ.comp27255_c1_seq1|ZHLZ.comp27407_c0_seq1|ZHLZ.comp27539_c0_seq1|ZHLZ.comp27950_c0_seq1|ZHLZ.comp34728_c0…	http://www.genome.jp/kegg-bin/show_pathway?ko01110
	KEGG PATHWAY	ko01120	33	2069	0.002035	0.0253968	ZHLZ.comp27091_c0_seq1|ZHLZ.comp27189_c0_seq1|ZHLZ.comp27213_c0_seq1|ZHLZ.comp27407_c0_seq1|ZHLZ.comp27757_c0_seq1|ZHLZ.comp35317_c0_seq1|ZHLZ.comp35381_c0_seq1|ZHLZ.comp35493_c0_seq1|ZHLZ.comp35571_c1_seq1|ZHLZ.comp35702_c0_seq1|ZHLZ.comp35725_c0_seq1|ZHLZ.comp37284_c1_seq1|ZHLZ.comp43206_c0_seq1|ZHLZ.comp45488_c0_seq1|ZHLZ.comp45546_c0_seq1|ZHLZ.comp461284_c0_seq1|ZHLZ.comp46348_c1_seq1|ZHLZ.co…	http://www.genome.jp/kegg-bin/show_pathway?ko01120
	KEGG PATHWAY	ko01130	49	1919	0.7665	0.9999	ZHLZ.comp27049_c0_seq1|ZHLZ.comp27091_c0_seq1|ZHLZ.comp27189_c0_seq1|ZHLZ.comp27213_c0_seq1|ZHLZ.comp27248_c0_seq1|ZHLZ.comp27339_c0_seq1|ZHLZ.comp27407_c0_seq1|ZHLZ.comp27539_c0_seq1|ZHLZ.comp34728_c0_seq1|ZHLZ.comp35381_c0_seq1|ZHLZ.comp35454_c0_seq1|ZHLZ.comp35571_c1_seq1|ZHLZ.comp35702_c0_seq1|ZHLZ.comp35725_c0_seq1|ZHLZ.comp35837_c0_seq1|ZHLZ.comp36125_c0_seq1|ZHLZ.comp37355_c0_seq1|ZHLZ.com…	http://www.genome.jp/kegg-bin/show_pathway?ko01130
	KEGG PATHWAY	ko01200	22	452	0.01199	0.0984442	ZHLZ.comp27091_c0_seq1|ZHLZ.comp27189_c0_seq1|ZHLZ.comp27213_c0_seq1|ZHLZ.comp27407_c0_seq1|ZHLZ.comp35381_c0_seq1|ZHLZ.comp35464_c0_seq1|ZHLZ.comp35725_c0_seq1|ZHLZ.comp37284_c1_seq1|ZHLZ.comp45488_c0_seq1|ZHLZ.comp45546_c0_seq1|ZHLZ.comp46348_c1_seq1|ZHLZ.comp46351_c0_seq1|ZHLZ.comp46620_c1_seq1|ZHLZ.comp49702_c0_seq1|ZHLZ.comp50733_c1_seq1|ZHLZ.comp52668_c0_seq1|ZHLZ.comp53042_c0_seq1|ZHLZ.com…	http://www.genome.jp/kegg-bin/show_pathway?ko01200
	KEGG PATHWAY	ko01210	3	213	0.3872	0.9999	ZHLZ.comp27091_c0_seq1|ZHLZ.comp52412_c0_seq1|ZHLZ.comp53042_c0_seq1|ZHLZ.comp56613_c0_seq1|	http://www.genome.jp/kegg-bin/show_pathway?ko01210
	KEGG PATHWAY	ko01212	13	177	0.001202	0.015626	ZHLZ.comp26923_c0_seq1|ZHLZ.comp27007_c0_seq1|ZHLZ.comp27781_c0_seq1|ZHLZ.comp43654_c0_seq1|ZHLZ.comp44087_c0_seq2|ZHLZ.comp50138_c0_seq1|ZHLZ.comp54400_c0_seq1|ZHLZ.comp55471_c0_seq1|ZHLZ.comp55945_c1_seq1|ZHLZ.comp55945_c1_seq2|ZHLZ.comp56608_c0_seq2|ZHLZ.comp58718_c0_seq1|ZHLZ.comp58913_c0_seq1|ZHLZ.comp59648_c0_seq1|ZHLZ.comp59684_c0_seq1|ZHLZ.comp59692_c0_seq1|	http://www.genome.jp/kegg-bin/show_pathway?ko01212
	KEGG PATHWAY	ko01220	3	466	0.003	0.0346667	ZHLZ.comp27061_c0_seq1|ZHLZ.comp27061_c1_seq1|ZHLZ.comp45488_c0_seq1|ZHLZ.comp54051_c0_seq1|ZHLZ.comp58329_c1_seq1|ZHLZ.comp58329_c1_seq2|ZHLZ.comp58329_c1_seq3|	http://www.genome.jp/kegg-bin/show_pathway?ko01220
	KEGG PATHWAY	ko01230	20	352	0.002412	0.028944	ZHLZ.comp27049_c0_seq1|ZHLZ.comp27091_c0_seq1|ZHLZ.comp27539_c0_seq1|ZHLZ.comp35381_c0_seq1|ZHLZ.comp35516_c0_seq1|ZHLZ.comp35516_c1_seq1|ZHLZ.comp35516_c2_seq1|ZHLZ.comp35725_c0_seq1|ZHLZ.comp36125_c0_seq1|ZHLZ.comp45546_c0_seq1|ZHLZ.comp46351_c0_seq1|ZHLZ.comp48411_c1_seq1|ZHLZ.comp49188_c0_seq1|ZHLZ.comp49194_c0_seq1|ZHLZ.comp49702_c0_seq1|ZHLZ.comp52412_c0_seq1|ZHLZ.comp52668_c0_seq1|ZHLZ.com…	http://www.genome.jp/kegg-bin/show_pathway?ko01230
	KEGG PATHWAY	ko01502	1	46	0.9999	0.9999	ZHLZ.comp52228_c0_seq1|	http://www.genome.jp/kegg-bin/show_pathway?ko01502
	KEGG PATHWAY	ko01521	1	72	0.9999	0.9999	ZHLZ.comp55656_c0_seq1|	http://www.genome.jp/kegg-bin/show_pathway?ko01521
	KEGG PATHWAY	ko01522	1	88	0.7338	0.9999	ZHLZ.comp55656_c0_seq1|	http://www.genome.jp/kegg-bin/show_pathway?ko01522
	KEGG PATHWAY	ko01523	1	55	0.9999	0.9999	ZHLZ.comp49280_c0_seq1|	http://www.genome.jp/kegg-bin/show_pathway?ko01523
	KEGG PATHWAY	ko01524	3	49	0.1459	0.632233	ZHLZ.comp35384_c0_seq1|ZHLZ.comp35493_c0_seq1|ZHLZ.comp35980_c0_seq1|ZHLZ.comp41023_c0_seq1|ZHLZ.comp45310_c1_seq1|ZHLZ.comp45740_c0_seq1|ZHLZ.comp45903_c0_seq1|ZHLZ.comp46712_c0_seq1|ZHLZ.comp46712_c1_seq1|ZHLZ.comp48129_c0_seq1|ZHLZ.comp49125_c2_seq1|ZHLZ.comp51834_c0_seq1|ZHLZ.comp55275_c1_seq1|ZHLZ.comp59593_c0_seq1|	http://www.genome.jp/kegg-bin/show_pathway?ko01524
	KEGG PATHWAY	ko02010	1	606	3.114e-06	0.000107952	ZHLZ.comp55992_c0_seq1|ZHLZ.comp58288_c0_seq1|	http://www.genome.jp/kegg-bin/show_pathway?ko02010
	KEGG PATHWAY	ko02020	3	536	0.0008156	0.0110638	ZHLZ.comp35350_c0_seq1|ZHLZ.comp35493_c0_seq1|ZHLZ.comp46712_c0_seq1|ZHLZ.comp46712_c1_seq1|ZHLZ.comp49234_c0_seq1|	http://www.genome.jp/kegg-bin/show_pathway?ko02020
	KEGG PATHWAY	ko02024	5	338	0.2297	0.796293	ZHLZ.comp43654_c0_seq1|ZHLZ.comp44087_c0_seq2|ZHLZ.comp44600_c1_seq1|ZHLZ.comp44600_c3_seq1|ZHLZ.comp44896_c0_seq1|ZHLZ.comp47058_c0_seq1|ZHLZ.comp48411_c1_seq1|ZHLZ.comp48489_c0_seq1|ZHLZ.comp50138_c0_seq1|ZHLZ.comp53141_c0_seq1|ZHLZ.comp53528_c0_seq1|ZHLZ.comp81686_c0_seq1|	http://www.genome.jp/kegg-bin/show_pathway?ko02024
	KEGG PATHWAY	ko03008	2	83	0.9999	0.9999	ZHLZ.comp48476_c0_seq1|ZHLZ.comp57250_c0_seq1|	http://www.genome.jp/kegg-bin/show_pathway?ko03008
	KEGG PATHWAY	ko03010	14	144	4.379e-05	0.00105096	ZHLZ.comp27349_c0_seq1|ZHLZ.comp35306_c0_seq1|ZHLZ.comp35546_c0_seq1|ZHLZ.comp35728_c0_seq3|ZHLZ.comp36077_c0_seq1|ZHLZ.comp36126_c0_seq1|ZHLZ.comp45362_c0_seq1|ZHLZ.comp47691_c0_seq3|ZHLZ.comp48382_c0_seq1|ZHLZ.comp49661_c0_seq1|ZHLZ.comp52002_c0_seq1|ZHLZ.comp54007_c0_seq2|ZHLZ.comp55601_c1_seq1|ZHLZ.comp60515_c0_seq1|	http://www.genome.jp/kegg-bin/show_pathway?ko03010
	KEGG PATHWAY	ko03013	1	142	0.1905	0.707689	ZHLZ.comp56586_c0_seq1|	http://www.genome.jp/kegg-bin/show_pathway?ko03013
	KEGG PATHWAY	ko03015	3	60	0.2201	0.789324	ZHLZ.comp43494_c0_seq1|ZHLZ.comp44715_c1_seq1|ZHLZ.comp59946_c0_seq1|	http://www.genome.jp/kegg-bin/show_pathway?ko03015
	KEGG PATHWAY	ko03018	2	79	0.9999	0.9999	ZHLZ.comp44376_c0_seq1|ZHLZ.comp50439_c0_seq1|	http://www.genome.jp/kegg-bin/show_pathway?ko03018
	KEGG PATHWAY	ko03022	1	36	0.6259	0.9999	ZHLZ.comp53163_c0_seq1|	http://www.genome.jp/kegg-bin/show_pathway?ko03022
	KEGG PATHWAY	ko03040	3	123	0.9999	0.9999	ZHLZ.comp44376_c0_seq1|ZHLZ.comp45931_c1_seq1|ZHLZ.comp45931_c2_seq1|ZHLZ.comp48476_c0_seq1|	http://www.genome.jp/kegg-bin/show_pathway?ko03040
	KEGG PATHWAY	ko03060	2	40	0.2935	0.889049	ZHLZ.comp27082_c0_seq1|ZHLZ.comp59789_c0_seq1|	http://www.genome.jp/kegg-bin/show_pathway?ko03060
	KEGG PATHWAY	ko03070	1	76	0.7253	0.9999	ZHLZ.comp27082_c0_seq1|	http://www.genome.jp/kegg-bin/show_pathway?ko03070
	KEGG PATHWAY	ko03320	4	67	0.1075	0.549836	ZHLZ.comp43654_c0_seq1|ZHLZ.comp44087_c0_seq2|ZHLZ.comp45808_c0_seq2|ZHLZ.comp50138_c0_seq1|ZHLZ.comp58718_c0_seq1|ZHLZ.comp58913_c0_seq1|	http://www.genome.jp/kegg-bin/show_pathway?ko03320
	KEGG PATHWAY	ko03440	1	73	0.9999	0.9999	ZHLZ.comp56959_c0_seq20|	http://www.genome.jp/kegg-bin/show_pathway?ko03440
	KEGG PATHWAY	ko03460	1	55	0.9999	0.9999	ZHLZ.comp56959_c0_seq20|	http://www.genome.jp/kegg-bin/show_pathway?ko03460
	KEGG PATHWAY	ko04010	3	199	0.5018	0.9999	ZHLZ.comp45444_c0_seq1|ZHLZ.comp45931_c1_seq1|ZHLZ.comp45931_c2_seq1|ZHLZ.comp55656_c0_seq1|	http://www.genome.jp/kegg-bin/show_pathway?ko04010
	KEGG PATHWAY	ko04011	1	91	0.5226	0.9999	ZHLZ.comp59640_c0_seq1|	http://www.genome.jp/kegg-bin/show_pathway?ko04011
	KEGG PATHWAY	ko04012	1	73	0.9999	0.9999	ZHLZ.comp55656_c0_seq1|	http://www.genome.jp/kegg-bin/show_pathway?ko04012
	KEGG PATHWAY	ko04013	3	85	0.5003	0.9999	ZHLZ.comp47709_c0_seq1|ZHLZ.comp55656_c0_seq1|ZHLZ.comp62979_c0_seq1|	http://www.genome.jp/kegg-bin/show_pathway?ko04013
	KEGG PATHWAY	ko04014	2	175	0.3388	0.939284	ZHLZ.comp44152_c0_seq1|ZHLZ.comp55656_c0_seq1|ZHLZ.comp56130_c0_seq1|	http://www.genome.jp/kegg-bin/show_pathway?ko04014
	KEGG PATHWAY	ko04015	3	162	0.8043	0.9999	ZHLZ.comp44152_c0_seq1|ZHLZ.comp55656_c0_seq1|ZHLZ.comp56130_c0_seq1|ZHLZ.comp62979_c0_seq1|	http://www.genome.jp/kegg-bin/show_pathway?ko04015
	KEGG PATHWAY	ko04016	11	55	2.39e-07	1.35772e-05	ZHLZ.comp34739_c0_seq1|ZHLZ.comp35076_c0_seq1|ZHLZ.comp35454_c0_seq1|ZHLZ.comp37110_c1_seq1|ZHLZ.comp44152_c0_seq1|ZHLZ.comp48606_c0_seq1|ZHLZ.comp48606_c0_seq2|ZHLZ.comp48984_c0_seq1|ZHLZ.comp49930_c0_seq1|ZHLZ.comp49947_c1_seq1|ZHLZ.comp52555_c0_seq1|ZHLZ.comp53035_c0_seq1|ZHLZ.comp53308_c0_seq1|ZHLZ.comp54447_c0_seq1|ZHLZ.comp54945_c0_seq1|ZHLZ.comp54945_c1_seq2|ZHLZ.comp55114_c0_seq1|ZHLZ.com…	http://www.genome.jp/kegg-bin/show_pathway?ko04016
	KEGG PATHWAY	ko04020	5	153	0.6111	0.9999	ZHLZ.comp44152_c0_seq1|ZHLZ.comp45444_c0_seq1|ZHLZ.comp54434_c0_seq1|ZHLZ.comp54434_c1_seq1|ZHLZ.comp56130_c0_seq1|ZHLZ.comp58150_c3_seq1|ZHLZ.comp59476_c0_seq1|	http://www.genome.jp/kegg-bin/show_pathway?ko04020
	KEGG PATHWAY	ko04022	6	132	0.1749	0.68211	ZHLZ.comp44152_c0_seq1|ZHLZ.comp44715_c1_seq1|ZHLZ.comp45444_c0_seq1|ZHLZ.comp55656_c0_seq1|ZHLZ.comp56130_c0_seq1|ZHLZ.comp58150_c3_seq1|ZHLZ.comp59476_c0_seq1|	http://www.genome.jp/kegg-bin/show_pathway?ko04022
	KEGG PATHWAY	ko04024	4	187	0.8212	0.9999	ZHLZ.comp44152_c0_seq1|ZHLZ.comp44715_c1_seq1|ZHLZ.comp55656_c0_seq1|ZHLZ.comp56130_c0_seq1|ZHLZ.comp58913_c0_seq1|	http://www.genome.jp/kegg-bin/show_pathway?ko04024
	KEGG PATHWAY	ko04062	1	159	0.1354	0.612243	ZHLZ.comp55656_c0_seq1|	http://www.genome.jp/kegg-bin/show_pathway?ko04062
	KEGG PATHWAY	ko04064	1	93	0.5229	0.9999	ZHLZ.comp54220_c0_seq2|	http://www.genome.jp/kegg-bin/show_pathway?ko04064
	KEGG PATHWAY	ko04066	3	87	0.5095	0.9999	ZHLZ.comp27189_c0_seq1|ZHLZ.comp46348_c1_seq1|ZHLZ.comp46620_c1_seq1|ZHLZ.comp54484_c2_seq1|ZHLZ.comp55656_c0_seq1|	http://www.genome.jp/kegg-bin/show_pathway?ko04066
	KEGG PATHWAY	ko04068	2	107	0.9999	0.9999	ZHLZ.comp35701_c0_seq1|ZHLZ.comp52586_c0_seq1|ZHLZ.comp52586_c1_seq1|ZHLZ.comp55656_c0_seq1|	http://www.genome.jp/kegg-bin/show_pathway?ko04068
	KEGG PATHWAY	ko04070	3	85	0.5003	0.9999	ZHLZ.comp44152_c0_seq1|ZHLZ.comp49427_c0_seq1|ZHLZ.comp55790_c0_seq1|ZHLZ.comp56130_c0_seq1|	http://www.genome.jp/kegg-bin/show_pathway?ko04070
	KEGG PATHWAY	ko04071	3	95	0.7439	0.9999	ZHLZ.comp54434_c0_seq1|ZHLZ.comp54434_c1_seq1|ZHLZ.comp55656_c0_seq1|ZHLZ.comp59946_c0_seq1|	http://www.genome.jp/kegg-bin/show_pathway?ko04071
	KEGG PATHWAY	ko04072	3	116	0.9999	0.9999	ZHLZ.comp54434_c0_seq1|ZHLZ.comp54434_c1_seq1|ZHLZ.comp55656_c0_seq1|ZHLZ.comp55790_c0_seq1|	http://www.genome.jp/kegg-bin/show_pathway?ko04072
	KEGG PATHWAY	ko04075	18	58	1.189e-14	3.70968e-12	ZHLZ.comp26919_c0_seq1|ZHLZ.comp27096_c0_seq1|ZHLZ.comp27317_c0_seq1|ZHLZ.comp34739_c0_seq1|ZHLZ.comp34762_c0_seq1|ZHLZ.comp35076_c0_seq1|ZHLZ.comp35187_c0_seq1|ZHLZ.comp35187_c1_seq1|ZHLZ.comp35187_c2_seq1|ZHLZ.comp35281_c0_seq1|ZHLZ.comp37110_c1_seq1|ZHLZ.comp37656_c0_seq1|ZHLZ.comp40423_c0_seq1|ZHLZ.comp45259_c0_seq1|ZHLZ.comp46972_c0_seq1|ZHLZ.comp47274_c0_seq1|ZHLZ.comp48704_c0_seq1|ZHLZ.com…	http://www.genome.jp/kegg-bin/show_pathway?ko04075
	KEGG PATHWAY	ko04110	2	110	0.9999	0.9999	ZHLZ.comp52690_c0_seq1|ZHLZ.comp59640_c0_seq1|	http://www.genome.jp/kegg-bin/show_pathway?ko04110
	KEGG PATHWAY	ko04111	1	125	0.2677	0.848388	ZHLZ.comp52690_c0_seq1|	http://www.genome.jp/kegg-bin/show_pathway?ko04111
	KEGG PATHWAY	ko04112	2	33	0.2233	0.7917	ZHLZ.comp26781_c0_seq1|ZHLZ.comp45526_c0_seq1|ZHLZ.comp48888_c0_seq1|ZHLZ.comp50906_c0_seq1|ZHLZ.comp51822_c0_seq1|ZHLZ.comp52228_c0_seq1|	http://www.genome.jp/kegg-bin/show_pathway?ko04112
	KEGG PATHWAY	ko04113	2	103	0.9999	0.9999	ZHLZ.comp44715_c1_seq1|ZHLZ.comp59946_c0_seq1|	http://www.genome.jp/kegg-bin/show_pathway?ko04113
	KEGG PATHWAY	ko04114	7	83	0.007372	0.0676489	ZHLZ.comp44152_c0_seq1|ZHLZ.comp44715_c1_seq1|ZHLZ.comp45444_c0_seq1|ZHLZ.comp52690_c0_seq1|ZHLZ.comp55656_c0_seq1|ZHLZ.comp56130_c0_seq1|ZHLZ.comp59640_c0_seq1|ZHLZ.comp59946_c0_seq1|	http://www.genome.jp/kegg-bin/show_pathway?ko04114
	KEGG PATHWAY	ko04115	2	63	0.6876	0.9999	ZHLZ.comp35493_c0_seq1|ZHLZ.comp46712_c0_seq1|ZHLZ.comp46712_c1_seq1|ZHLZ.comp47709_c0_seq1|	http://www.genome.jp/kegg-bin/show_pathway?ko04115
	KEGG PATHWAY	ko04120	4	126	0.5848	0.9999	ZHLZ.comp34721_c0_seq1|ZHLZ.comp47709_c0_seq1|ZHLZ.comp52690_c0_seq1|ZHLZ.comp53194_c0_seq2|	http://www.genome.jp/kegg-bin/show_pathway?ko04120
	KEGG PATHWAY	ko04130	1	36	0.6259	0.9999	ZHLZ.comp40375_c0_seq1|	http://www.genome.jp/kegg-bin/show_pathway?ko04130
	KEGG PATHWAY	ko04138	1	81	0.7274	0.9999	ZHLZ.comp27151_c0_seq1|	http://www.genome.jp/kegg-bin/show_pathway?ko04138
	KEGG PATHWAY	ko04140	3	105	0.7617	0.9999	ZHLZ.comp35701_c0_seq1|ZHLZ.comp52586_c0_seq1|ZHLZ.comp52586_c1_seq1|ZHLZ.comp54154_c0_seq1|ZHLZ.comp55656_c0_seq1|	http://www.genome.jp/kegg-bin/show_pathway?ko04140
	KEGG PATHWAY	ko04141	12	147	0.0007312	0.0105811	ZHLZ.comp27041_c0_seq1|ZHLZ.comp35734_c0_seq1|ZHLZ.comp43886_c0_seq1|ZHLZ.comp45792_c0_seq1|ZHLZ.comp45931_c1_seq1|ZHLZ.comp45931_c2_seq1|ZHLZ.comp46905_c0_seq1|ZHLZ.comp47898_c0_seq1|ZHLZ.comp47898_c2_seq1|ZHLZ.comp48653_c0_seq1|ZHLZ.comp48720_c0_seq2|ZHLZ.comp48982_c0_seq1|ZHLZ.comp48982_c1_seq1|ZHLZ.comp48982_c2_seq1|ZHLZ.comp51242_c2_seq1|ZHLZ.comp52163_c0_seq1|ZHLZ.comp52690_c0_seq1|ZHLZ.com…	http://www.genome.jp/kegg-bin/show_pathway?ko04141
	KEGG PATHWAY	ko04142	10	108	0.0007461	0.0105811	ZHLZ.comp26993_c0_seq1|ZHLZ.comp27007_c0_seq1|ZHLZ.comp27011_c0_seq1|ZHLZ.comp27103_c0_seq1|ZHLZ.comp35684_c0_seq1|ZHLZ.comp37137_c0_seq1|ZHLZ.comp47672_c0_seq1|ZHLZ.comp54154_c0_seq1|ZHLZ.comp55877_c0_seq1|ZHLZ.comp59536_c0_seq1|ZHLZ.comp60684_c0_seq1|	http://www.genome.jp/kegg-bin/show_pathway?ko04142
	KEGG PATHWAY	ko04144	4	185	0.8212	0.9999	ZHLZ.comp27128_c0_seq1|ZHLZ.comp45931_c1_seq1|ZHLZ.comp45931_c2_seq1|ZHLZ.comp50471_c0_seq1|ZHLZ.comp59813_c0_seq1|ZHLZ.comp60982_c0_seq1|	http://www.genome.jp/kegg-bin/show_pathway?ko04144
	KEGG PATHWAY	ko04145	8	97	0.004953	0.053352	ZHLZ.comp49427_c0_seq1|ZHLZ.comp49501_c0_seq1|ZHLZ.comp52640_c0_seq1|ZHLZ.comp52640_c0_seq5|ZHLZ.comp53293_c0_seq1|ZHLZ.comp55802_c0_seq14|ZHLZ.comp58172_c1_seq3|ZHLZ.comp59536_c0_seq1|ZHLZ.comp59789_c0_seq1|ZHLZ.comp59849_c0_seq1|	http://www.genome.jp/kegg-bin/show_pathway?ko04145
	KEGG PATHWAY	ko04146	5	73	0.0478	0.298272	ZHLZ.comp35508_c0_seq1|ZHLZ.comp35837_c0_seq1|ZHLZ.comp43654_c0_seq1|ZHLZ.comp44087_c0_seq2|ZHLZ.comp50138_c0_seq1|ZHLZ.comp57069_c0_seq4|ZHLZ.comp58913_c0_seq1|	http://www.genome.jp/kegg-bin/show_pathway?ko04146
	KEGG PATHWAY	ko04150	5	118	0.2538	0.840758	ZHLZ.comp35701_c0_seq1|ZHLZ.comp49501_c0_seq1|ZHLZ.comp52586_c0_seq1|ZHLZ.comp52586_c1_seq1|ZHLZ.comp53293_c0_seq1|ZHLZ.comp55656_c0_seq1|ZHLZ.comp58172_c1_seq3|	http://www.genome.jp/kegg-bin/show_pathway?ko04150
	KEGG PATHWAY	ko04151	5	247	0.6909	0.9999	ZHLZ.comp35701_c0_seq1|ZHLZ.comp51242_c2_seq1|ZHLZ.comp52586_c0_seq1|ZHLZ.comp52586_c1_seq1|ZHLZ.comp55656_c0_seq1|ZHLZ.comp59640_c0_seq1|ZHLZ.comp59946_c0_seq1|	http://www.genome.jp/kegg-bin/show_pathway?ko04151
	KEGG PATHWAY	ko04152	4	108	0.5405	0.9999	ZHLZ.comp35701_c0_seq1|ZHLZ.comp44518_c0_seq1|ZHLZ.comp47829_c2_seq1|ZHLZ.comp52586_c0_seq1|ZHLZ.comp52586_c1_seq1|ZHLZ.comp59946_c0_seq1|	http://www.genome.jp/kegg-bin/show_pathway?ko04152
	KEGG PATHWAY	ko04210	5	114	0.2393	0.811539	ZHLZ.comp35493_c0_seq1|ZHLZ.comp37137_c0_seq1|ZHLZ.comp46712_c0_seq1|ZHLZ.comp46712_c1_seq1|ZHLZ.comp52640_c0_seq1|ZHLZ.comp52640_c0_seq5|ZHLZ.comp54154_c0_seq1|ZHLZ.comp55656_c0_seq1|ZHLZ.comp55802_c0_seq14|	http://www.genome.jp/kegg-bin/show_pathway?ko04210
	KEGG PATHWAY	ko04211	1	76	0.7253	0.9999	ZHLZ.comp35701_c0_seq1|ZHLZ.comp52586_c0_seq1|ZHLZ.comp52586_c1_seq1|	http://www.genome.jp/kegg-bin/show_pathway?ko04211
	KEGG PATHWAY	ko04212	2	68	0.7058	0.9999	ZHLZ.comp26781_c0_seq1|ZHLZ.comp45526_c0_seq1|ZHLZ.comp48888_c0_seq1|ZHLZ.comp50906_c0_seq1|ZHLZ.comp51822_c0_seq1|ZHLZ.comp57069_c0_seq4|	http://www.genome.jp/kegg-bin/show_pathway?ko04212
	KEGG PATHWAY	ko04213	3	61	0.2272	0.796293	ZHLZ.comp35508_c0_seq1|ZHLZ.comp35701_c0_seq1|ZHLZ.comp45931_c1_seq1|ZHLZ.comp45931_c2_seq1|ZHLZ.comp52586_c0_seq1|ZHLZ.comp52586_c1_seq1|	http://www.genome.jp/kegg-bin/show_pathway?ko04213
	KEGG PATHWAY	ko04214	2	58	0.6703	0.9999	ZHLZ.comp27967_c0_seq1|ZHLZ.comp35493_c0_seq1|ZHLZ.comp35564_c0_seq1|ZHLZ.comp46712_c0_seq1|ZHLZ.comp46712_c1_seq1|	http://www.genome.jp/kegg-bin/show_pathway?ko04214
	KEGG PATHWAY	ko04215	1	40	0.9999	0.9999	ZHLZ.comp35493_c0_seq1|ZHLZ.comp46712_c0_seq1|ZHLZ.comp46712_c1_seq1|	http://www.genome.jp/kegg-bin/show_pathway?ko04215
	KEGG PATHWAY	ko04216	3	65	0.256	0.840758	ZHLZ.comp43654_c0_seq1|ZHLZ.comp44087_c0_seq2|ZHLZ.comp46581_c0_seq1|ZHLZ.comp50138_c0_seq1|ZHLZ.comp52763_c0_seq1|ZHLZ.comp58150_c3_seq1|	http://www.genome.jp/kegg-bin/show_pathway?ko04216
	KEGG PATHWAY	ko04217	4	107	0.5386	0.9999	ZHLZ.comp27001_c0_seq1|ZHLZ.comp35557_c0_seq1|ZHLZ.comp36181_c0_seq1|ZHLZ.comp46581_c0_seq1|ZHLZ.comp52763_c0_seq1|ZHLZ.comp58150_c3_seq1|ZHLZ.comp59476_c0_seq1|	http://www.genome.jp/kegg-bin/show_pathway?ko04217
	KEGG PATHWAY	ko04218	6	122	0.1486	0.635112	ZHLZ.comp44152_c0_seq1|ZHLZ.comp44715_c1_seq1|ZHLZ.comp45444_c0_seq1|ZHLZ.comp55656_c0_seq1|ZHLZ.comp56130_c0_seq1|ZHLZ.comp58150_c3_seq1|ZHLZ.comp59476_c0_seq1|	http://www.genome.jp/kegg-bin/show_pathway?ko04218
	KEGG PATHWAY	ko04260	2	65	0.6948	0.9999	ZHLZ.comp35350_c0_seq1|ZHLZ.comp49234_c0_seq1|	http://www.genome.jp/kegg-bin/show_pathway?ko04260
	KEGG PATHWAY	ko04261	3	104	0.7597	0.9999	ZHLZ.comp44152_c0_seq1|ZHLZ.comp44715_c1_seq1|ZHLZ.comp56130_c0_seq1|ZHLZ.comp59946_c0_seq1|	http://www.genome.jp/kegg-bin/show_pathway?ko04261
	KEGG PATHWAY	ko04270	3	113	0.9999	0.9999	ZHLZ.comp44152_c0_seq1|ZHLZ.comp44715_c1_seq1|ZHLZ.comp55656_c0_seq1|ZHLZ.comp56130_c0_seq1|	http://www.genome.jp/kegg-bin/show_pathway?ko04270
	KEGG PATHWAY	ko04310	4	105	0.3708	0.997324	ZHLZ.comp45444_c0_seq1|ZHLZ.comp47709_c0_seq1|ZHLZ.comp52690_c0_seq1|ZHLZ.comp56113_c0_seq1|	http://www.genome.jp/kegg-bin/show_pathway?ko04310
	KEGG PATHWAY	ko04320	1	28	0.5346	0.9999	ZHLZ.comp55656_c0_seq1|	http://www.genome.jp/kegg-bin/show_pathway?ko04320
	KEGG PATHWAY	ko04341	1	24	0.4809	0.9999	ZHLZ.comp52690_c0_seq1|	http://www.genome.jp/kegg-bin/show_pathway?ko04341
	KEGG PATHWAY	ko04350	1	71	0.9999	0.9999	ZHLZ.comp52690_c0_seq1|	http://www.genome.jp/kegg-bin/show_pathway?ko04350
	KEGG PATHWAY	ko04360	2	124	0.7764	0.9999	ZHLZ.comp24911_c0_seq1|ZHLZ.comp34083_c0_seq1|ZHLZ.comp45444_c0_seq1|ZHLZ.comp60464_c0_seq1|	http://www.genome.jp/kegg-bin/show_pathway?ko04360
	KEGG PATHWAY	ko04370	3	46	0.1273	0.612243	ZHLZ.comp45444_c0_seq1|ZHLZ.comp54434_c0_seq1|ZHLZ.comp54434_c1_seq1|ZHLZ.comp55656_c0_seq1|	http://www.genome.jp/kegg-bin/show_pathway?ko04370
	KEGG PATHWAY	ko04371	4	112	0.5486	0.9999	ZHLZ.comp35701_c0_seq1|ZHLZ.comp44152_c0_seq1|ZHLZ.comp52586_c0_seq1|ZHLZ.comp52586_c1_seq1|ZHLZ.comp54434_c0_seq1|ZHLZ.comp54434_c1_seq1|ZHLZ.comp55656_c0_seq1|ZHLZ.comp56130_c0_seq1|	http://www.genome.jp/kegg-bin/show_pathway?ko04371
	KEGG PATHWAY	ko04380	3	103	0.7578	0.9999	ZHLZ.comp27103_c0_seq1|ZHLZ.comp45444_c0_seq1|ZHLZ.comp55656_c0_seq1|	http://www.genome.jp/kegg-bin/show_pathway?ko04380
	KEGG PATHWAY	ko04390	2	112	0.7722	0.9999	ZHLZ.comp44715_c1_seq1|ZHLZ.comp59640_c0_seq1|	http://www.genome.jp/kegg-bin/show_pathway?ko04390
	KEGG PATHWAY	ko04391	1	53	0.9999	0.9999	ZHLZ.comp59640_c0_seq1|	http://www.genome.jp/kegg-bin/show_pathway?ko04391
	KEGG PATHWAY	ko04510	2	151	0.4456	0.9999	ZHLZ.comp44715_c1_seq1|ZHLZ.comp55656_c0_seq1|	http://www.genome.jp/kegg-bin/show_pathway?ko04510
	KEGG PATHWAY	ko04530	3	103	0.7578	0.9999	CL531Contig1|ZHLZ.comp35701_c0_seq1|ZHLZ.comp52586_c0_seq1|ZHLZ.comp52586_c1_seq1|ZHLZ.comp52640_c0_seq1|ZHLZ.comp52640_c0_seq5|ZHLZ.comp55802_c0_seq14|	http://www.genome.jp/kegg-bin/show_pathway?ko04530
	KEGG PATHWAY	ko04540	2	71	0.717	0.9999	ZHLZ.comp52640_c0_seq1|ZHLZ.comp52640_c0_seq5|ZHLZ.comp55656_c0_seq1|ZHLZ.comp55802_c0_seq14|	http://www.genome.jp/kegg-bin/show_pathway?ko04540
	KEGG PATHWAY	ko04550	1	109	0.375	0.9999	ZHLZ.comp55656_c0_seq1|	http://www.genome.jp/kegg-bin/show_pathway?ko04550
	KEGG PATHWAY	ko04611	1	104	0.5327	0.9999	ZHLZ.comp44715_c1_seq1|	http://www.genome.jp/kegg-bin/show_pathway?ko04611
	KEGG PATHWAY	ko04612	5	42	0.005355	0.055692	ZHLZ.comp26993_c0_seq1|ZHLZ.comp32988_c0_seq1|ZHLZ.comp32988_c1_seq1|ZHLZ.comp45931_c1_seq1|ZHLZ.comp45931_c2_seq1|ZHLZ.comp49777_c0_seq1|ZHLZ.comp54154_c0_seq1|ZHLZ.comp59849_c0_seq1|	http://www.genome.jp/kegg-bin/show_pathway?ko04612
	KEGG PATHWAY	ko04614	1	34	0.6049	0.9999	ZHLZ.comp43344_c0_seq1|	http://www.genome.jp/kegg-bin/show_pathway?ko04614
	KEGG PATHWAY	ko04620	2	77	0.9999	0.9999	ZHLZ.comp54220_c0_seq2|ZHLZ.comp55656_c0_seq1|	http://www.genome.jp/kegg-bin/show_pathway?ko04620
	KEGG PATHWAY	ko04621	3	152	0.8014	0.9999	ZHLZ.comp43315_c0_seq1|ZHLZ.comp51319_c0_seq1|ZHLZ.comp54154_c0_seq1|ZHLZ.comp54786_c1_seq1|ZHLZ.comp58150_c3_seq1|	http://www.genome.jp/kegg-bin/show_pathway?ko04621
	KEGG PATHWAY	ko04622	1	54	0.9999	0.9999	ZHLZ.comp51817_c0_seq1|	http://www.genome.jp/kegg-bin/show_pathway?ko04622
	KEGG PATHWAY	ko04624	1	49	0.9999	0.9999	ZHLZ.comp54220_c0_seq2|	http://www.genome.jp/kegg-bin/show_pathway?ko04624
	KEGG PATHWAY	ko04626	16	84	1.053e-09	1.64268e-07	ZHLZ.comp27433_c0_seq1|ZHLZ.comp27940_c0_seq1|ZHLZ.comp35089_c0_seq1|ZHLZ.comp36677_c0_seq1|ZHLZ.comp37110_c1_seq1|ZHLZ.comp44152_c0_seq1|ZHLZ.comp47722_c0_seq1|ZHLZ.comp48984_c0_seq1|ZHLZ.comp51242_c2_seq1|ZHLZ.comp52177_c0_seq1|ZHLZ.comp54447_c0_seq1|ZHLZ.comp54447_c0_seq4|ZHLZ.comp55114_c0_seq1|ZHLZ.comp55656_c0_seq1|ZHLZ.comp56130_c0_seq1|ZHLZ.comp56670_c0_seq1|ZHLZ.comp58384_c0_seq1|ZHLZ.com…	http://www.genome.jp/kegg-bin/show_pathway?ko04626
	KEGG PATHWAY	ko04650	2	86	0.9999	0.9999	ZHLZ.comp45444_c0_seq1|ZHLZ.comp55656_c0_seq1|	http://www.genome.jp/kegg-bin/show_pathway?ko04650
	KEGG PATHWAY	ko04657	1	82	0.7281	0.9999	ZHLZ.comp51242_c2_seq1|	http://www.genome.jp/kegg-bin/show_pathway?ko04657
	KEGG PATHWAY	ko04658	1	71	0.9999	0.9999	ZHLZ.comp45444_c0_seq1|	http://www.genome.jp/kegg-bin/show_pathway?ko04658
	KEGG PATHWAY	ko04659	1	90	0.7362	0.9999	ZHLZ.comp45444_c0_seq1|	http://www.genome.jp/kegg-bin/show_pathway?ko04659
	KEGG PATHWAY	ko04660	2	90	0.9999	0.9999	ZHLZ.comp45444_c0_seq1|ZHLZ.comp55656_c0_seq1|	http://www.genome.jp/kegg-bin/show_pathway?ko04660
	KEGG PATHWAY	ko04662	2	62	0.684	0.9999	ZHLZ.comp45444_c0_seq1|ZHLZ.comp55656_c0_seq1|	http://www.genome.jp/kegg-bin/show_pathway?ko04662
	KEGG PATHWAY	ko04664	1	59	0.9999	0.9999	ZHLZ.comp55656_c0_seq1|	http://www.genome.jp/kegg-bin/show_pathway?ko04664
	KEGG PATHWAY	ko04666	4	67	0.1075	0.549836	ZHLZ.comp24911_c0_seq1|ZHLZ.comp34083_c0_seq1|ZHLZ.comp54434_c0_seq1|ZHLZ.comp54434_c1_seq1|ZHLZ.comp55656_c0_seq1|ZHLZ.comp60464_c0_seq1|ZHLZ.comp60982_c0_seq1|	http://www.genome.jp/kegg-bin/show_pathway?ko04666
	KEGG PATHWAY	ko04668	1	89	0.735	0.9999	ZHLZ.comp55656_c0_seq1|	http://www.genome.jp/kegg-bin/show_pathway?ko04668
	KEGG PATHWAY	ko04710	2	27	0.1644	0.66614	ZHLZ.comp35701_c0_seq1|ZHLZ.comp52586_c0_seq1|ZHLZ.comp52586_c1_seq1|ZHLZ.comp52690_c0_seq1|	http://www.genome.jp/kegg-bin/show_pathway?ko04710
	KEGG PATHWAY	ko04712	4	28	0.006507	0.0615207	ZHLZ.comp27950_c0_seq1|ZHLZ.comp35281_c0_seq1|ZHLZ.comp39786_c0_seq1|ZHLZ.comp48479_c0_seq1|	http://www.genome.jp/kegg-bin/show_pathway?ko04712
	KEGG PATHWAY	ko04713	1	90	0.7362	0.9999	ZHLZ.comp44152_c0_seq1|ZHLZ.comp56130_c0_seq1|	http://www.genome.jp/kegg-bin/show_pathway?ko04713
	KEGG PATHWAY	ko04720	4	51	0.0488	0.298541	ZHLZ.comp44152_c0_seq1|ZHLZ.comp44715_c1_seq1|ZHLZ.comp45444_c0_seq1|ZHLZ.comp55656_c0_seq1|ZHLZ.comp56130_c0_seq1|	http://www.genome.jp/kegg-bin/show_pathway?ko04720
	KEGG PATHWAY	ko04721	7	53	0.0005538	0.00863928	ZHLZ.comp27151_c0_seq1|ZHLZ.comp40375_c0_seq1|ZHLZ.comp49501_c0_seq1|ZHLZ.comp53293_c0_seq1|ZHLZ.comp58172_c1_seq3|ZHLZ.comp59536_c0_seq1|ZHLZ.comp61057_c0_seq1|	http://www.genome.jp/kegg-bin/show_pathway?ko04721
	KEGG PATHWAY	ko04722	4	96	0.3324	0.939284	ZHLZ.comp44152_c0_seq1|ZHLZ.comp54220_c0_seq2|ZHLZ.comp55656_c0_seq1|ZHLZ.comp56130_c0_seq1|ZHLZ.comp59640_c0_seq1|	http://www.genome.jp/kegg-bin/show_pathway?ko04722
	KEGG PATHWAY	ko04723	7	139	0.1058	0.549836	ZHLZ.comp35641_c0_seq1|ZHLZ.comp47668_c0_seq1|ZHLZ.comp59549_c0_seq1|ZHLZ.comp59621_c0_seq1|ZHLZ.comp59623_c0_seq1|ZHLZ.comp59856_c0_seq1|ZHLZ.comp61057_c0_seq1|	http://www.genome.jp/kegg-bin/show_pathway?ko04723
	KEGG PATHWAY	ko04724	2	94	0.9999	0.9999	ZHLZ.comp45444_c0_seq1|ZHLZ.comp46658_c1_seq1|	http://www.genome.jp/kegg-bin/show_pathway?ko04724
	KEGG PATHWAY	ko04725	1	102	0.53	0.9999	ZHLZ.comp55656_c0_seq1|	http://www.genome.jp/kegg-bin/show_pathway?ko04725
	KEGG PATHWAY	ko04726	1	127	0.2682	0.848388	ZHLZ.comp55656_c0_seq1|	http://www.genome.jp/kegg-bin/show_pathway?ko04726
	KEGG PATHWAY	ko04727	3	75	0.4577	0.9999	ZHLZ.comp46658_c1_seq1|ZHLZ.comp48489_c0_seq1|ZHLZ.comp61057_c0_seq1|	http://www.genome.jp/kegg-bin/show_pathway?ko04727
	KEGG PATHWAY	ko04728	3	96	0.7455	0.9999	ZHLZ.comp44152_c0_seq1|ZHLZ.comp44715_c1_seq1|ZHLZ.comp56130_c0_seq1|ZHLZ.comp59946_c0_seq1|	http://www.genome.jp/kegg-bin/show_pathway?ko04728
	KEGG PATHWAY	ko04730	1	55	0.9999	0.9999	ZHLZ.comp55656_c0_seq1|	http://www.genome.jp/kegg-bin/show_pathway?ko04730
	KEGG PATHWAY	ko04740	1	34	0.6049	0.9999	ZHLZ.comp44152_c0_seq1|ZHLZ.comp56130_c0_seq1|	http://www.genome.jp/kegg-bin/show_pathway?ko04740
	KEGG PATHWAY	ko04744	1	27	0.5217	0.9999	ZHLZ.comp44152_c0_seq1|ZHLZ.comp56130_c0_seq1|	http://www.genome.jp/kegg-bin/show_pathway?ko04744
	KEGG PATHWAY	ko04745	1	30	0.5593	0.9999	ZHLZ.comp44152_c0_seq1|ZHLZ.comp56130_c0_seq1|	http://www.genome.jp/kegg-bin/show_pathway?ko04745
	KEGG PATHWAY	ko04750	2	104	0.9999	0.9999	ZHLZ.comp44152_c0_seq1|ZHLZ.comp44715_c1_seq1|ZHLZ.comp56130_c0_seq1|	http://www.genome.jp/kegg-bin/show_pathway?ko04750
	KEGG PATHWAY	ko04810	6	158	0.3261	0.939284	ZHLZ.comp24911_c0_seq1|ZHLZ.comp34083_c0_seq1|ZHLZ.comp44715_c1_seq1|ZHLZ.comp49427_c0_seq1|ZHLZ.comp55656_c0_seq1|ZHLZ.comp60464_c0_seq1|ZHLZ.comp60982_c0_seq1|ZHLZ.comp62979_c0_seq1|	http://www.genome.jp/kegg-bin/show_pathway?ko04810
	KEGG PATHWAY	ko04910	5	91	0.1005	0.540621	ZHLZ.comp35701_c0_seq1|ZHLZ.comp44152_c0_seq1|ZHLZ.comp44715_c1_seq1|ZHLZ.comp48338_c0_seq1|ZHLZ.comp52586_c0_seq1|ZHLZ.comp52586_c1_seq1|ZHLZ.comp55656_c0_seq1|ZHLZ.comp56130_c0_seq1|	http://www.genome.jp/kegg-bin/show_pathway?ko04910
	KEGG PATHWAY	ko04912	2	70	0.7132	0.9999	ZHLZ.comp44152_c0_seq1|ZHLZ.comp55656_c0_seq1|ZHLZ.comp56130_c0_seq1|	http://www.genome.jp/kegg-bin/show_pathway?ko04912
	KEGG PATHWAY	ko04914	1	69	0.9999	0.9999	ZHLZ.comp55656_c0_seq1|	http://www.genome.jp/kegg-bin/show_pathway?ko04914
	KEGG PATHWAY	ko04915	4	75	0.1449	0.632233	ZHLZ.comp44152_c0_seq1|ZHLZ.comp45931_c1_seq1|ZHLZ.comp45931_c2_seq1|ZHLZ.comp51242_c2_seq1|ZHLZ.comp55656_c0_seq1|ZHLZ.comp56130_c0_seq1|	http://www.genome.jp/kegg-bin/show_pathway?ko04915
	KEGG PATHWAY	ko04916	3	74	0.4538	0.9999	ZHLZ.comp44152_c0_seq1|ZHLZ.comp47117_c0_seq1|ZHLZ.comp55656_c0_seq1|ZHLZ.comp56130_c0_seq1|	http://www.genome.jp/kegg-bin/show_pathway?ko04916
	KEGG PATHWAY	ko04917	1	69	0.9999	0.9999	ZHLZ.comp55656_c0_seq1|	http://www.genome.jp/kegg-bin/show_pathway?ko04917
	KEGG PATHWAY	ko04918	2	74	0.9999	0.9999	ZHLZ.comp51242_c2_seq1|ZHLZ.comp59767_c0_seq1|	http://www.genome.jp/kegg-bin/show_pathway?ko04918
	KEGG PATHWAY	ko04919	2	99	0.9999	0.9999	ZHLZ.comp53141_c0_seq1|ZHLZ.comp53528_c0_seq1|ZHLZ.comp55656_c0_seq1|	http://www.genome.jp/kegg-bin/show_pathway?ko04919
	KEGG PATHWAY	ko04920	2	61	0.6805	0.9999	ZHLZ.comp35701_c0_seq1|ZHLZ.comp43654_c0_seq1|ZHLZ.comp44087_c0_seq2|ZHLZ.comp50138_c0_seq1|ZHLZ.comp52586_c0_seq1|ZHLZ.comp52586_c1_seq1|	http://www.genome.jp/kegg-bin/show_pathway?ko04920
	KEGG PATHWAY	ko04921	6	125	0.1558	0.656886	ZHLZ.comp35701_c0_seq1|ZHLZ.comp44152_c0_seq1|ZHLZ.comp44715_c1_seq1|ZHLZ.comp45444_c0_seq1|ZHLZ.comp47829_c2_seq1|ZHLZ.comp52586_c0_seq1|ZHLZ.comp52586_c1_seq1|ZHLZ.comp55656_c0_seq1|ZHLZ.comp56130_c0_seq1|	http://www.genome.jp/kegg-bin/show_pathway?ko04921
	KEGG PATHWAY	ko04922	6	82	0.02393	0.173018	ZHLZ.comp27189_c0_seq1|ZHLZ.comp35701_c0_seq1|ZHLZ.comp44152_c0_seq1|ZHLZ.comp45444_c0_seq1|ZHLZ.comp46348_c1_seq1|ZHLZ.comp46620_c1_seq1|ZHLZ.comp52586_c0_seq1|ZHLZ.comp52586_c1_seq1|ZHLZ.comp52668_c0_seq1|ZHLZ.comp54484_c2_seq1|ZHLZ.comp56130_c0_seq1|	http://www.genome.jp/kegg-bin/show_pathway?ko04922
	KEGG PATHWAY	ko04924	3	68	0.4331	0.9999	ZHLZ.comp44152_c0_seq1|ZHLZ.comp45444_c0_seq1|ZHLZ.comp54154_c0_seq1|ZHLZ.comp56130_c0_seq1|	http://www.genome.jp/kegg-bin/show_pathway?ko04924
	KEGG PATHWAY	ko04925	1	83	0.7289	0.9999	ZHLZ.comp44152_c0_seq1|ZHLZ.comp56130_c0_seq1|	http://www.genome.jp/kegg-bin/show_pathway?ko04925
	KEGG PATHWAY	ko04926	1	103	0.5313	0.9999	ZHLZ.comp55656_c0_seq1|	http://www.genome.jp/kegg-bin/show_pathway?ko04926
	KEGG PATHWAY	ko04930	1	44	0.9999	0.9999	ZHLZ.comp52668_c0_seq1|	http://www.genome.jp/kegg-bin/show_pathway?ko04930
	KEGG PATHWAY	ko04931	3	94	0.7424	0.9999	ZHLZ.comp35701_c0_seq1|ZHLZ.comp44715_c1_seq1|ZHLZ.comp52586_c0_seq1|ZHLZ.comp52586_c1_seq1|ZHLZ.comp55986_c0_seq1|	http://www.genome.jp/kegg-bin/show_pathway?ko04931
	KEGG PATHWAY	ko04932	12	127	0.0001936	0.00335573	ZHLZ.comp27213_c0_seq1|ZHLZ.comp35350_c0_seq1|ZHLZ.comp35493_c0_seq1|ZHLZ.comp35641_c0_seq1|ZHLZ.comp35701_c0_seq1|ZHLZ.comp46712_c0_seq1|ZHLZ.comp46712_c1_seq1|ZHLZ.comp47668_c0_seq1|ZHLZ.comp49234_c0_seq1|ZHLZ.comp50733_c1_seq1|ZHLZ.comp52586_c0_seq1|ZHLZ.comp52586_c1_seq1|ZHLZ.comp59549_c0_seq1|ZHLZ.comp59621_c0_seq1|ZHLZ.comp59623_c0_seq1|ZHLZ.comp59856_c0_seq1|	http://www.genome.jp/kegg-bin/show_pathway?ko04932
	KEGG PATHWAY	ko04940	1	29	0.5472	0.9999	ZHLZ.comp48489_c0_seq1|	http://www.genome.jp/kegg-bin/show_pathway?ko04940
	KEGG PATHWAY	ko04961	1	39	0.9999	0.9999	ZHLZ.comp50471_c0_seq1|ZHLZ.comp59813_c0_seq1|	http://www.genome.jp/kegg-bin/show_pathway?ko04961
	KEGG PATHWAY	ko04962	2	36	0.2534	0.840758	ZHLZ.comp46923_c0_seq1|ZHLZ.comp50471_c0_seq1|ZHLZ.comp59813_c0_seq1|	http://www.genome.jp/kegg-bin/show_pathway?ko04962
	KEGG PATHWAY	ko04966	4	26	0.004959	0.053352	ZHLZ.comp49501_c0_seq1|ZHLZ.comp53293_c0_seq1|ZHLZ.comp58172_c1_seq3|ZHLZ.comp59536_c0_seq1|	http://www.genome.jp/kegg-bin/show_pathway?ko04966
	KEGG PATHWAY	ko04970	1	81	0.7274	0.9999	ZHLZ.comp44152_c0_seq1|ZHLZ.comp56130_c0_seq1|	http://www.genome.jp/kegg-bin/show_pathway?ko04970
	KEGG PATHWAY	ko04971	1	64	0.9999	0.9999	ZHLZ.comp44152_c0_seq1|ZHLZ.comp56130_c0_seq1|	http://www.genome.jp/kegg-bin/show_pathway?ko04971
	KEGG PATHWAY	ko04972	1	83	0.7289	0.9999	ZHLZ.comp50471_c0_seq1|ZHLZ.comp59813_c0_seq1|	http://www.genome.jp/kegg-bin/show_pathway?ko04972
	KEGG PATHWAY	ko04973	1	49	0.9999	0.9999	ZHLZ.comp34958_c0_seq1|ZHLZ.comp52545_c0_seq1|	http://www.genome.jp/kegg-bin/show_pathway?ko04973
	KEGG PATHWAY	ko04974	1	104	0.5327	0.9999	ZHLZ.comp46658_c1_seq1|	http://www.genome.jp/kegg-bin/show_pathway?ko04974
	KEGG PATHWAY	ko04976	2	235	0.09901	0.540621	ZHLZ.comp44518_c0_seq1|ZHLZ.comp55992_c0_seq1|ZHLZ.comp58288_c0_seq1|	http://www.genome.jp/kegg-bin/show_pathway?ko04976
	KEGG PATHWAY	ko04978	2	61	0.6805	0.9999	ZHLZ.comp46581_c0_seq1|ZHLZ.comp48129_c0_seq1|ZHLZ.comp52763_c0_seq1|	http://www.genome.jp/kegg-bin/show_pathway?ko04978
	KEGG PATHWAY	ko05010	16	151	4.392e-06	0.00013703	ZHLZ.comp27009_c0_seq1|ZHLZ.comp27213_c0_seq1|ZHLZ.comp35350_c0_seq1|ZHLZ.comp35493_c0_seq1|ZHLZ.comp35641_c0_seq1|ZHLZ.comp44152_c0_seq1|ZHLZ.comp45444_c0_seq1|ZHLZ.comp46712_c0_seq1|ZHLZ.comp46712_c1_seq1|ZHLZ.comp47499_c0_seq1|ZHLZ.comp47668_c0_seq1|ZHLZ.comp49234_c0_seq1|ZHLZ.comp50733_c1_seq1|ZHLZ.comp54548_c0_seq1|ZHLZ.comp54988_c0_seq1|ZHLZ.comp56130_c0_seq1|ZHLZ.comp59549_c0_seq1|ZHLZ.com…	http://www.genome.jp/kegg-bin/show_pathway?ko05010
	KEGG PATHWAY	ko05012	16	137	1.22e-06	4.758e-05	ZHLZ.comp27009_c0_seq1|ZHLZ.comp27213_c0_seq1|ZHLZ.comp35350_c0_seq1|ZHLZ.comp35493_c0_seq1|ZHLZ.comp35641_c0_seq1|ZHLZ.comp46712_c0_seq1|ZHLZ.comp46712_c1_seq1|ZHLZ.comp47499_c0_seq1|ZHLZ.comp47668_c0_seq1|ZHLZ.comp49234_c0_seq1|ZHLZ.comp50733_c1_seq1|ZHLZ.comp54548_c0_seq1|ZHLZ.comp54988_c0_seq1|ZHLZ.comp58150_c3_seq1|ZHLZ.comp59476_c0_seq1|ZHLZ.comp59549_c0_seq1|ZHLZ.comp59621_c0_seq1|ZHLZ.com…	http://www.genome.jp/kegg-bin/show_pathway?ko05012
	KEGG PATHWAY	ko05014	3	54	0.1786	0.687941	ZHLZ.comp35493_c0_seq1|ZHLZ.comp35508_c0_seq1|ZHLZ.comp45444_c0_seq1|ZHLZ.comp46712_c0_seq1|ZHLZ.comp46712_c1_seq1|	http://www.genome.jp/kegg-bin/show_pathway?ko05014
	KEGG PATHWAY	ko05016	17	153	1.171e-06	4.758e-05	ZHLZ.comp27009_c0_seq1|ZHLZ.comp27213_c0_seq1|ZHLZ.comp35350_c0_seq1|ZHLZ.comp35493_c0_seq1|ZHLZ.comp35508_c0_seq1|ZHLZ.comp35641_c0_seq1|ZHLZ.comp46712_c0_seq1|ZHLZ.comp46712_c1_seq1|ZHLZ.comp47499_c0_seq1|ZHLZ.comp47668_c0_seq1|ZHLZ.comp49234_c0_seq1|ZHLZ.comp50733_c1_seq1|ZHLZ.comp54548_c0_seq1|ZHLZ.comp54988_c0_seq1|ZHLZ.comp58150_c3_seq1|ZHLZ.comp59476_c0_seq1|ZHLZ.comp59549_c0_seq1|ZHLZ.com…	http://www.genome.jp/kegg-bin/show_pathway?ko05016
	KEGG PATHWAY	ko05020	2	34	0.2333	0.799886	ZHLZ.comp35508_c0_seq1|ZHLZ.comp55656_c0_seq1|	http://www.genome.jp/kegg-bin/show_pathway?ko05020
	KEGG PATHWAY	ko05031	3	56	0.1922	0.707689	ZHLZ.comp44152_c0_seq1|ZHLZ.comp44715_c1_seq1|ZHLZ.comp45444_c0_seq1|ZHLZ.comp56130_c0_seq1|	http://www.genome.jp/kegg-bin/show_pathway?ko05031
	KEGG PATHWAY	ko05032	1	77	0.7255	0.9999	ZHLZ.comp61057_c0_seq1|	http://www.genome.jp/kegg-bin/show_pathway?ko05032
	KEGG PATHWAY	ko05033	1	35	0.6156	0.9999	ZHLZ.comp61057_c0_seq1|	http://www.genome.jp/kegg-bin/show_pathway?ko05033
	KEGG PATHWAY	ko05034	6	95	0.04438	0.282583	ZHLZ.comp27001_c0_seq1|ZHLZ.comp35557_c0_seq1|ZHLZ.comp35604_c1_seq1|ZHLZ.comp36181_c0_seq1|ZHLZ.comp44152_c0_seq1|ZHLZ.comp44715_c1_seq1|ZHLZ.comp45797_c0_seq1|ZHLZ.comp55656_c0_seq1|ZHLZ.comp56130_c0_seq1|ZHLZ.comp59440_c0_seq1|ZHLZ.comp59503_c0_seq1|	http://www.genome.jp/kegg-bin/show_pathway?ko05034
	KEGG PATHWAY	ko05100	1	74	0.725	0.9999	ZHLZ.comp60982_c0_seq1|	http://www.genome.jp/kegg-bin/show_pathway?ko05100
	KEGG PATHWAY	ko05110	5	58	0.02024	0.150354	ZHLZ.comp49501_c0_seq1|ZHLZ.comp53293_c0_seq1|ZHLZ.comp58172_c1_seq3|ZHLZ.comp59536_c0_seq1|ZHLZ.comp59789_c0_seq1|	http://www.genome.jp/kegg-bin/show_pathway?ko05110
	KEGG PATHWAY	ko05120	4	98	0.3405	0.939284	ZHLZ.comp49501_c0_seq1|ZHLZ.comp53293_c0_seq1|ZHLZ.comp58172_c1_seq3|ZHLZ.comp59536_c0_seq1|	http://www.genome.jp/kegg-bin/show_pathway?ko05120
	KEGG PATHWAY	ko05130	2	45	0.3432	0.939284	ZHLZ.comp52640_c0_seq1|ZHLZ.comp52640_c0_seq5|ZHLZ.comp55802_c0_seq14|ZHLZ.comp60982_c0_seq1|	http://www.genome.jp/kegg-bin/show_pathway?ko05130
	KEGG PATHWAY	ko05131	2	66	0.6984	0.9999	ZHLZ.comp60982_c0_seq1|ZHLZ.comp62979_c0_seq1|	http://www.genome.jp/kegg-bin/show_pathway?ko05131
	KEGG PATHWAY	ko05132	2	87	0.9999	0.9999	ZHLZ.comp60982_c0_seq1|ZHLZ.comp62979_c0_seq1|	http://www.genome.jp/kegg-bin/show_pathway?ko05132
	KEGG PATHWAY	ko05133	3	90	0.7367	0.9999	ZHLZ.comp24911_c0_seq1|ZHLZ.comp34083_c0_seq1|ZHLZ.comp44152_c0_seq1|ZHLZ.comp54220_c0_seq2|ZHLZ.comp56130_c0_seq1|ZHLZ.comp60464_c0_seq1|	http://www.genome.jp/kegg-bin/show_pathway?ko05133
	KEGG PATHWAY	ko05134	2	71	0.717	0.9999	ZHLZ.comp35493_c0_seq1|ZHLZ.comp45931_c1_seq1|ZHLZ.comp45931_c2_seq1|ZHLZ.comp46712_c0_seq1|ZHLZ.comp46712_c1_seq1|	http://www.genome.jp/kegg-bin/show_pathway?ko05134
	KEGG PATHWAY	ko05140	1	65	0.9999	0.9999	ZHLZ.comp54220_c0_seq2|	http://www.genome.jp/kegg-bin/show_pathway?ko05140
	KEGG PATHWAY	ko05142	2	90	0.9999	0.9999	ZHLZ.comp54220_c0_seq2|ZHLZ.comp59849_c0_seq1|	http://www.genome.jp/kegg-bin/show_pathway?ko05142
	KEGG PATHWAY	ko05145	4	98	0.3405	0.939284	ZHLZ.comp27433_c0_seq1|ZHLZ.comp35493_c0_seq1|ZHLZ.comp45931_c1_seq1|ZHLZ.comp45931_c2_seq1|ZHLZ.comp46712_c0_seq1|ZHLZ.comp46712_c1_seq1|ZHLZ.comp54220_c0_seq2|	http://www.genome.jp/kegg-bin/show_pathway?ko05145
	KEGG PATHWAY	ko05152	7	141	0.1096	0.551535	ZHLZ.comp32988_c0_seq1|ZHLZ.comp32988_c1_seq1|ZHLZ.comp35493_c0_seq1|ZHLZ.comp44152_c0_seq1|ZHLZ.comp45444_c0_seq1|ZHLZ.comp46712_c0_seq1|ZHLZ.comp46712_c1_seq1|ZHLZ.comp49777_c0_seq1|ZHLZ.comp54220_c0_seq2|ZHLZ.comp54434_c0_seq1|ZHLZ.comp54434_c1_seq1|ZHLZ.comp56130_c0_seq1|ZHLZ.comp59536_c0_seq1|	http://www.genome.jp/kegg-bin/show_pathway?ko05152
	KEGG PATHWAY	ko05161	2	113	0.7723	0.9999	ZHLZ.comp35493_c0_seq1|ZHLZ.comp46712_c0_seq1|ZHLZ.comp46712_c1_seq1|ZHLZ.comp55656_c0_seq1|	http://www.genome.jp/kegg-bin/show_pathway?ko05161
	KEGG PATHWAY	ko05162	4	114	0.553	0.9999	ZHLZ.comp45931_c1_seq1|ZHLZ.comp45931_c2_seq1|ZHLZ.comp46484_c0_seq1|ZHLZ.comp49658_c0_seq1|ZHLZ.comp54220_c0_seq2|	http://www.genome.jp/kegg-bin/show_pathway?ko05162
	KEGG PATHWAY	ko05164	5	128	0.4005	0.9999	ZHLZ.comp35493_c0_seq1|ZHLZ.comp45931_c1_seq1|ZHLZ.comp45931_c2_seq1|ZHLZ.comp46484_c0_seq1|ZHLZ.comp46712_c0_seq1|ZHLZ.comp46712_c1_seq1|ZHLZ.comp48084_c0_seq1|ZHLZ.comp55656_c0_seq1|	http://www.genome.jp/kegg-bin/show_pathway?ko05164
	KEGG PATHWAY	ko05165	6	232	0.9999	0.9999	ZHLZ.comp46484_c0_seq1|ZHLZ.comp52668_c0_seq1|ZHLZ.comp54613_c0_seq5|ZHLZ.comp55656_c0_seq1|ZHLZ.comp56124_c0_seq1|ZHLZ.comp59946_c0_seq1|	http://www.genome.jp/kegg-bin/show_pathway?ko05165
	KEGG PATHWAY	ko05166	5	218	0.9999	0.9999	ZHLZ.comp45444_c0_seq1|ZHLZ.comp48084_c0_seq1|ZHLZ.comp58150_c3_seq1|ZHLZ.comp59476_c0_seq1|ZHLZ.comp59849_c0_seq1|	http://www.genome.jp/kegg-bin/show_pathway?ko05166
	KEGG PATHWAY	ko05167	3	161	0.8039	0.9999	ZHLZ.comp35493_c0_seq1|ZHLZ.comp45444_c0_seq1|ZHLZ.comp46712_c0_seq1|ZHLZ.comp46712_c1_seq1|ZHLZ.comp55656_c0_seq1|	http://www.genome.jp/kegg-bin/show_pathway?ko05167
	KEGG PATHWAY	ko05168	4	148	0.9999	0.9999	ZHLZ.comp35493_c0_seq1|ZHLZ.comp35979_c0_seq1|ZHLZ.comp44715_c1_seq1|ZHLZ.comp46712_c0_seq1|ZHLZ.comp46712_c1_seq1|ZHLZ.comp52690_c0_seq1|	http://www.genome.jp/kegg-bin/show_pathway?ko05168
	KEGG PATHWAY	ko05169	3	168	0.6332	0.9999	ZHLZ.comp45931_c1_seq1|ZHLZ.comp45931_c2_seq1|ZHLZ.comp54220_c0_seq2|ZHLZ.comp59640_c0_seq1|	http://www.genome.jp/kegg-bin/show_pathway?ko05169
	KEGG PATHWAY	ko05200	3	344	0.03949	0.262146	ZHLZ.comp35493_c0_seq1|ZHLZ.comp46712_c0_seq1|ZHLZ.comp46712_c1_seq1|ZHLZ.comp51242_c2_seq1|ZHLZ.comp55656_c0_seq1|	http://www.genome.jp/kegg-bin/show_pathway?ko05200
	KEGG PATHWAY	ko05202	1	158	0.1351	0.612243	ZHLZ.comp35604_c1_seq1|ZHLZ.comp45797_c0_seq1|ZHLZ.comp59440_c0_seq1|	http://www.genome.jp/kegg-bin/show_pathway?ko05202
	KEGG PATHWAY	ko05203	3	173	0.6344	0.9999	ZHLZ.comp52668_c0_seq1|ZHLZ.comp59503_c0_seq1|ZHLZ.comp59640_c0_seq1|	http://www.genome.jp/kegg-bin/show_pathway?ko05203
	KEGG PATHWAY	ko05204	2	136	0.5909	0.9999	ZHLZ.comp35384_c0_seq1|ZHLZ.comp35980_c0_seq1|ZHLZ.comp41023_c0_seq1|ZHLZ.comp45310_c1_seq1|ZHLZ.comp45488_c0_seq1|ZHLZ.comp45740_c0_seq1|ZHLZ.comp45903_c0_seq1|ZHLZ.comp49125_c2_seq1|ZHLZ.comp51834_c0_seq1|ZHLZ.comp55275_c1_seq1|ZHLZ.comp59593_c0_seq1|	http://www.genome.jp/kegg-bin/show_pathway?ko05204
	KEGG PATHWAY	ko05205	3	170	0.6335	0.9999	ZHLZ.comp44715_c1_seq1|ZHLZ.comp48524_c0_seq1|ZHLZ.comp55656_c0_seq1|	http://www.genome.jp/kegg-bin/show_pathway?ko05205
	KEGG PATHWAY	ko05206	2	233	0.09848	0.540621	ZHLZ.comp55656_c0_seq1|ZHLZ.comp55992_c0_seq1|ZHLZ.comp58288_c0_seq1|	http://www.genome.jp/kegg-bin/show_pathway?ko05206
	KEGG PATHWAY	ko05210	2	60	0.6771	0.9999	ZHLZ.comp35493_c0_seq1|ZHLZ.comp46712_c0_seq1|ZHLZ.comp46712_c1_seq1|ZHLZ.comp55656_c0_seq1|	http://www.genome.jp/kegg-bin/show_pathway?ko05210
	KEGG PATHWAY	ko05211	1	57	0.9999	0.9999	ZHLZ.comp55656_c0_seq1|	http://www.genome.jp/kegg-bin/show_pathway?ko05211
	KEGG PATHWAY	ko05212	1	64	0.9999	0.9999	ZHLZ.comp55656_c0_seq1|	http://www.genome.jp/kegg-bin/show_pathway?ko05212
	KEGG PATHWAY	ko05213	1	47	0.9999	0.9999	ZHLZ.comp55656_c0_seq1|	http://www.genome.jp/kegg-bin/show_pathway?ko05213
	KEGG PATHWAY	ko05214	2	57	0.667	0.9999	ZHLZ.comp44152_c0_seq1|ZHLZ.comp55656_c0_seq1|ZHLZ.comp56130_c0_seq1|	http://www.genome.jp/kegg-bin/show_pathway?ko05214
	KEGG PATHWAY	ko05215	2	82	0.9999	0.9999	ZHLZ.comp51242_c2_seq1|ZHLZ.comp55656_c0_seq1|	http://www.genome.jp/kegg-bin/show_pathway?ko05215
	KEGG PATHWAY	ko05216	1	35	0.6156	0.9999	ZHLZ.comp55656_c0_seq1|	http://www.genome.jp/kegg-bin/show_pathway?ko05216
	KEGG PATHWAY	ko05218	1	49	0.9999	0.9999	ZHLZ.comp55656_c0_seq1|	http://www.genome.jp/kegg-bin/show_pathway?ko05218
	KEGG PATHWAY	ko05219	1	39	0.9999	0.9999	ZHLZ.comp55656_c0_seq1|	http://www.genome.jp/kegg-bin/show_pathway?ko05219
	KEGG PATHWAY	ko05220	1	64	0.9999	0.9999	ZHLZ.comp55656_c0_seq1|	http://www.genome.jp/kegg-bin/show_pathway?ko05220
	KEGG PATHWAY	ko05221	1	58	0.9999	0.9999	ZHLZ.comp55656_c0_seq1|	http://www.genome.jp/kegg-bin/show_pathway?ko05221
	KEGG PATHWAY	ko05222	1	78	0.7258	0.9999	ZHLZ.comp35493_c0_seq1|ZHLZ.comp46712_c0_seq1|ZHLZ.comp46712_c1_seq1|	http://www.genome.jp/kegg-bin/show_pathway?ko05222
	KEGG PATHWAY	ko05223	1	63	0.9999	0.9999	ZHLZ.comp55656_c0_seq1|	http://www.genome.jp/kegg-bin/show_pathway?ko05223
	KEGG PATHWAY	ko05224	1	106	0.5358	0.9999	ZHLZ.comp55656_c0_seq1|	http://www.genome.jp/kegg-bin/show_pathway?ko05224
	KEGG PATHWAY	ko05230	4	84	0.2917	0.889049	ZHLZ.comp27189_c0_seq1|ZHLZ.comp46348_c1_seq1|ZHLZ.comp46620_c1_seq1|ZHLZ.comp52668_c0_seq1|ZHLZ.comp54484_c2_seq1|ZHLZ.comp55656_c0_seq1|	http://www.genome.jp/kegg-bin/show_pathway?ko05230
	KEGG PATHWAY	ko05231	2	73	0.7245	0.9999	ZHLZ.comp55656_c0_seq1|ZHLZ.comp55790_c0_seq1|	http://www.genome.jp/kegg-bin/show_pathway?ko05231
	KEGG PATHWAY	ko05322	3	49	0.1459	0.632233	ZHLZ.comp27001_c0_seq1|ZHLZ.comp35557_c0_seq1|ZHLZ.comp35604_c1_seq1|ZHLZ.comp36181_c0_seq1|ZHLZ.comp45797_c0_seq1|ZHLZ.comp59440_c0_seq1|ZHLZ.comp59503_c0_seq1|	http://www.genome.jp/kegg-bin/show_pathway?ko05322
	KEGG PATHWAY	ko05323	5	70	0.04111	0.267215	ZHLZ.comp27103_c0_seq1|ZHLZ.comp49501_c0_seq1|ZHLZ.comp53293_c0_seq1|ZHLZ.comp58172_c1_seq3|ZHLZ.comp59536_c0_seq1|	http://www.genome.jp/kegg-bin/show_pathway?ko05323
	KEGG PATHWAY	ko05410	1	79	0.7263	0.9999	ZHLZ.comp35701_c0_seq1|ZHLZ.comp52586_c0_seq1|ZHLZ.comp52586_c1_seq1|	http://www.genome.jp/kegg-bin/show_pathway?ko05410
	KEGG PATHWAY	ko05416	1	38	0.9999	0.9999	ZHLZ.comp35493_c0_seq1|ZHLZ.comp46712_c0_seq1|ZHLZ.comp46712_c1_seq1|	http://www.genome.jp/kegg-bin/show_pathway?ko05416
	KEGG PATHWAY	ko05418	5	107	0.2168	0.78653	ZHLZ.comp35384_c0_seq1|ZHLZ.comp35701_c0_seq1|ZHLZ.comp35980_c0_seq1|ZHLZ.comp41023_c0_seq1|ZHLZ.comp43315_c0_seq1|ZHLZ.comp44152_c0_seq1|ZHLZ.comp45310_c1_seq1|ZHLZ.comp45740_c0_seq1|ZHLZ.comp45903_c0_seq1|ZHLZ.comp49125_c2_seq1|ZHLZ.comp51242_c2_seq1|ZHLZ.comp51319_c0_seq1|ZHLZ.comp51834_c0_seq1|ZHLZ.comp52586_c0_seq1|ZHLZ.comp52586_c1_seq1|ZHLZ.comp54786_c1_seq1|ZHLZ.comp55275_c1_seq1|ZHLZ.com…	http://www.genome.jp/kegg-bin/show_pathway?ko05418
	KEGG PATHWAY	ko00010	9	131	0.0005063	0.0141258	ZHLZ.comp26910_c0_seq1|ZHLZ.comp27189_c0_seq1|ZHLZ.comp35381_c0_seq1|ZHLZ.comp40126_c0_seq1|ZHLZ.comp40126_c1_seq1|ZHLZ.comp40126_c2_seq1|ZHLZ.comp46813_c0_seq1|ZHLZ.comp46813_c1_seq1|ZHLZ.comp48310_c1_seq1|ZHLZ.comp48518_c0_seq1|ZHLZ.comp49797_c0_seq1|ZHLZ.comp50340_c0_seq1|ZHLZ.comp58329_c1_seq2|ZHLZ.comp58406_c1_seq1|ZHLZ.comp58406_c3_seq2|	http://www.genome.jp/kegg-bin/show_pathway?ko00010
	KEGG PATHWAY	ko00020	2	78	0.3887	0.977003	ZHLZ.comp27189_c0_seq1|ZHLZ.comp59542_c0_seq1|	http://www.genome.jp/kegg-bin/show_pathway?ko00020
	KEGG PATHWAY	ko00030	2	115	0.7255	0.9999	ZHLZ.comp26910_c0_seq1|ZHLZ.comp35381_c0_seq1|ZHLZ.comp50340_c0_seq1|	http://www.genome.jp/kegg-bin/show_pathway?ko00030
	KEGG PATHWAY	ko00040	5	126	0.06802	0.441339	ZHLZ.comp27256_c0_seq1|ZHLZ.comp38685_c0_seq1|ZHLZ.comp44600_c1_seq1|ZHLZ.comp44600_c3_seq1|ZHLZ.comp47058_c0_seq1|ZHLZ.comp49885_c0_seq1|ZHLZ.comp52054_c0_seq1|ZHLZ.comp52113_c0_seq3|ZHLZ.comp52552_c1_seq1|ZHLZ.comp53344_c0_seq1|ZHLZ.comp54417_c0_seq1|ZHLZ.comp56129_c0_seq1|ZHLZ.comp56605_c0_seq5|ZHLZ.comp56605_c1_seq1|ZHLZ.comp56605_c2_seq1|ZHLZ.comp57143_c0_seq1|ZHLZ.comp81686_c0_seq1|	http://www.genome.jp/kegg-bin/show_pathway?ko00040
	KEGG PATHWAY	ko00051	6	163	0.06465	0.43989	ZHLZ.comp26910_c0_seq1|ZHLZ.comp35381_c0_seq1|ZHLZ.comp35654_c0_seq1|ZHLZ.comp44096_c0_seq1|ZHLZ.comp48766_c0_seq1|ZHLZ.comp50340_c0_seq1|ZHLZ.comp54791_c0_seq1|	http://www.genome.jp/kegg-bin/show_pathway?ko00051
	KEGG PATHWAY	ko00052	2	124	0.9999	0.9999	ZHLZ.comp26910_c0_seq1|ZHLZ.comp58510_c0_seq1|	http://www.genome.jp/kegg-bin/show_pathway?ko00052
	KEGG PATHWAY	ko00053	2	94	0.6773	0.9999	ZHLZ.comp49797_c0_seq1|ZHLZ.comp52113_c0_seq3|	http://www.genome.jp/kegg-bin/show_pathway?ko00053
	KEGG PATHWAY	ko00061	3	84	0.1766	0.724579	ZHLZ.comp45166_c0_seq1|ZHLZ.comp50138_c0_seq1|ZHLZ.comp53444_c0_seq1|ZHLZ.comp53640_c0_seq1|ZHLZ.comp53640_c1_seq1|ZHLZ.comp55471_c0_seq1|	http://www.genome.jp/kegg-bin/show_pathway?ko00061
	KEGG PATHWAY	ko00062	2	64	0.3016	0.945465	ZHLZ.comp49315_c0_seq1|ZHLZ.comp55945_c1_seq1|ZHLZ.comp55945_c1_seq2|ZHLZ.comp56214_c0_seq2|ZHLZ.comp56214_c1_seq2|ZHLZ.comp57955_c0_seq1|	http://www.genome.jp/kegg-bin/show_pathway?ko00062
	KEGG PATHWAY	ko00071	6	105	0.01006	0.165102	ZHLZ.comp45166_c0_seq1|ZHLZ.comp48310_c1_seq1|ZHLZ.comp49797_c0_seq1|ZHLZ.comp50138_c0_seq1|ZHLZ.comp56608_c0_seq2|ZHLZ.comp58329_c1_seq2|ZHLZ.comp58406_c1_seq1|ZHLZ.comp58406_c3_seq2|ZHLZ.comp58913_c0_seq1|	http://www.genome.jp/kegg-bin/show_pathway?ko00071
	KEGG PATHWAY	ko00073	3	42	0.03571	0.346919	ZHLZ.comp35912_c0_seq1|ZHLZ.comp46620_c2_seq1|ZHLZ.comp48839_c1_seq1|ZHLZ.comp48839_c2_seq1|ZHLZ.comp58056_c0_seq2|	http://www.genome.jp/kegg-bin/show_pathway?ko00073
	KEGG PATHWAY	ko00100	2	82	0.6534	0.9999	ZHLZ.comp53188_c0_seq1|ZHLZ.comp55773_c0_seq1|	http://www.genome.jp/kegg-bin/show_pathway?ko00100
	KEGG PATHWAY	ko00130	5	147	0.1118	0.567131	ZHLZ.comp27255_c0_seq1|ZHLZ.comp27255_c1_seq1|ZHLZ.comp27372_c0_seq1|ZHLZ.comp49194_c0_seq1|ZHLZ.comp50520_c0_seq2|ZHLZ.comp51076_c0_seq1|ZHLZ.comp54051_c0_seq1|	http://www.genome.jp/kegg-bin/show_pathway?ko00130
	KEGG PATHWAY	ko00140	1	147	0.5245	0.9999	ZHLZ.comp55945_c1_seq1|ZHLZ.comp55945_c1_seq2|	http://www.genome.jp/kegg-bin/show_pathway?ko00140
	KEGG PATHWAY	ko00190	2	232	0.4458	0.9999	ZHLZ.comp41833_c0_seq1|ZHLZ.comp49352_c0_seq1|ZHLZ.comp49352_c1_seq1|ZHLZ.comp49352_c3_seq1|	http://www.genome.jp/kegg-bin/show_pathway?ko00190
	KEGG PATHWAY	ko00195	14	75	5.298e-11	7.39071e-09	ZHLZ.comp26931_c0_seq2|ZHLZ.comp26992_c1_seq1|ZHLZ.comp27133_c1_seq1|ZHLZ.comp35504_c0_seq1|ZHLZ.comp35609_c0_seq1|ZHLZ.comp46106_c0_seq1|ZHLZ.comp46145_c0_seq1|ZHLZ.comp48739_c0_seq1|ZHLZ.comp50769_c0_seq2|ZHLZ.comp52537_c1_seq1|ZHLZ.comp55287_c0_seq2|ZHLZ.comp59454_c0_seq1|ZHLZ.comp59475_c0_seq1|ZHLZ.comp59691_c0_seq1|	http://www.genome.jp/kegg-bin/show_pathway?ko00195
	KEGG PATHWAY	ko00196	9	43	4.835e-08	3.37241e-06	ZHLZ.comp26926_c0_seq1|ZHLZ.comp26935_c0_seq1|ZHLZ.comp35584_c0_seq1|ZHLZ.comp35600_c0_seq1|ZHLZ.comp52210_c1_seq1|ZHLZ.comp52437_c0_seq1|ZHLZ.comp52587_c0_seq1|ZHLZ.comp57801_c0_seq1|ZHLZ.comp57801_c1_seq1|ZHLZ.comp59522_c0_seq1|ZHLZ.comp59558_c0_seq1|	http://www.genome.jp/kegg-bin/show_pathway?ko00196
	KEGG PATHWAY	ko00230	2	368	0.09898	0.552308	ZHLZ.comp59734_c0_seq1|ZHLZ.comp59930_c0_seq1|	http://www.genome.jp/kegg-bin/show_pathway?ko00230
	KEGG PATHWAY	ko00250	2	96	0.6816	0.9999	ZHLZ.comp35703_c0_seq1|ZHLZ.comp53114_c0_seq1|	http://www.genome.jp/kegg-bin/show_pathway?ko00250
	KEGG PATHWAY	ko00270	6	162	0.06315	0.43989	CL2317Contig1|ZHLZ.comp35516_c0_seq1|ZHLZ.comp35516_c1_seq1|ZHLZ.comp35516_c2_seq1|ZHLZ.comp49194_c0_seq1|ZHLZ.comp49915_c0_seq1|ZHLZ.comp49915_c1_seq1|ZHLZ.comp56132_c0_seq1|ZHLZ.comp57462_c0_seq1|ZHLZ.comp57462_c1_seq1|ZHLZ.comp57462_c1_seq2|ZHLZ.comp57462_c2_seq2|ZHLZ.comp60725_c0_seq1|	http://www.genome.jp/kegg-bin/show_pathway?ko00270
	KEGG PATHWAY	ko00280	1	111	0.9999	0.9999	ZHLZ.comp49797_c0_seq1|	http://www.genome.jp/kegg-bin/show_pathway?ko00280
	KEGG PATHWAY	ko00310	1	129	0.729	0.9999	ZHLZ.comp49797_c0_seq1|	http://www.genome.jp/kegg-bin/show_pathway?ko00310
	KEGG PATHWAY	ko00330	2	177	0.773	0.9999	ZHLZ.comp47074_c0_seq1|ZHLZ.comp49797_c0_seq1|	http://www.genome.jp/kegg-bin/show_pathway?ko00330
	KEGG PATHWAY	ko00333	1	39	0.4914	0.9999	ZHLZ.comp55471_c0_seq1|	http://www.genome.jp/kegg-bin/show_pathway?ko00333
	KEGG PATHWAY	ko00340	2	94	0.6773	0.9999	ZHLZ.comp49797_c0_seq1|ZHLZ.comp61746_c0_seq1|	http://www.genome.jp/kegg-bin/show_pathway?ko00340
	KEGG PATHWAY	ko00350	6	149	0.04558	0.355648	ZHLZ.comp26963_c0_seq1|ZHLZ.comp27372_c0_seq1|ZHLZ.comp47117_c0_seq1|ZHLZ.comp48310_c1_seq1|ZHLZ.comp49194_c0_seq1|ZHLZ.comp58329_c1_seq2|ZHLZ.comp58406_c1_seq1|ZHLZ.comp58406_c3_seq2|	http://www.genome.jp/kegg-bin/show_pathway?ko00350
	KEGG PATHWAY	ko00360	6	149	0.04558	0.355648	ZHLZ.comp27255_c0_seq1|ZHLZ.comp27255_c1_seq1|ZHLZ.comp27372_c0_seq1|ZHLZ.comp49194_c0_seq1|ZHLZ.comp51076_c0_seq1|ZHLZ.comp54051_c0_seq1|ZHLZ.comp58732_c7_seq34|ZHLZ.comp59502_c0_seq1|	http://www.genome.jp/kegg-bin/show_pathway?ko00360
	KEGG PATHWAY	ko00361	1	123	0.7269	0.9999	ZHLZ.comp35571_c1_seq1|	http://www.genome.jp/kegg-bin/show_pathway?ko00361
	KEGG PATHWAY	ko00364	1	51	0.5868	0.9999	ZHLZ.comp35571_c1_seq1|	http://www.genome.jp/kegg-bin/show_pathway?ko00364
	KEGG PATHWAY	ko00380	3	150	0.7455	0.9999	ZHLZ.comp46736_c0_seq1|ZHLZ.comp49797_c0_seq1|ZHLZ.comp59437_c0_seq1|	http://www.genome.jp/kegg-bin/show_pathway?ko00380
	KEGG PATHWAY	ko00400	5	108	0.03979	0.346919	ZHLZ.comp27049_c0_seq1|ZHLZ.comp46429_c0_seq1|ZHLZ.comp48411_c1_seq1|ZHLZ.comp49194_c0_seq1|ZHLZ.comp53251_c0_seq1|	http://www.genome.jp/kegg-bin/show_pathway?ko00400
	KEGG PATHWAY	ko00401	1	63	0.9999	0.9999	ZHLZ.comp49194_c0_seq1|	http://www.genome.jp/kegg-bin/show_pathway?ko00401
	KEGG PATHWAY	ko00410	1	76	0.9999	0.9999	ZHLZ.comp49797_c0_seq1|	http://www.genome.jp/kegg-bin/show_pathway?ko00410
	KEGG PATHWAY	ko00450	1	56	0.621	0.9999	ZHLZ.comp57462_c0_seq1|ZHLZ.comp57462_c1_seq1|ZHLZ.comp57462_c1_seq2|ZHLZ.comp57462_c2_seq2|	http://www.genome.jp/kegg-bin/show_pathway?ko00450
	KEGG PATHWAY	ko00460	2	80	0.4008	0.989586	ZHLZ.comp26845_c0_seq1|ZHLZ.comp36142_c0_seq1|ZHLZ.comp47439_c0_seq1|ZHLZ.comp54462_c1_seq2|ZHLZ.comp57437_c1_seq2|ZHLZ.comp58678_c0_seq2|ZHLZ.comp58678_c0_seq4|	http://www.genome.jp/kegg-bin/show_pathway?ko00460
	KEGG PATHWAY	ko00480	1	82	0.9999	0.9999	ZHLZ.comp27514_c0_seq1|ZHLZ.comp35384_c0_seq1|ZHLZ.comp35980_c0_seq1|ZHLZ.comp45740_c0_seq1|ZHLZ.comp47918_c0_seq1|ZHLZ.comp47918_c1_seq1|ZHLZ.comp49125_c2_seq1|ZHLZ.comp54113_c0_seq1|ZHLZ.comp59593_c0_seq1|ZHLZ.comp86401_c0_seq1|	http://www.genome.jp/kegg-bin/show_pathway?ko00480
	KEGG PATHWAY	ko00500	12	147	1.202e-05	0.000479083	ZHLZ.comp26845_c0_seq1|ZHLZ.comp34958_c0_seq1|ZHLZ.comp36142_c0_seq1|ZHLZ.comp47439_c0_seq1|ZHLZ.comp48766_c0_seq1|ZHLZ.comp50082_c0_seq1|ZHLZ.comp52173_c0_seq1|ZHLZ.comp52545_c0_seq1|ZHLZ.comp53234_c1_seq1|ZHLZ.comp54462_c1_seq2|ZHLZ.comp54801_c0_seq1|ZHLZ.comp55250_c0_seq1|ZHLZ.comp56443_c1_seq3|ZHLZ.comp56675_c0_seq1|ZHLZ.comp56675_c0_seq2|ZHLZ.comp57012_c2_seq1|ZHLZ.comp57437_c1_seq2|ZHLZ.com…	http://www.genome.jp/kegg-bin/show_pathway?ko00500
	KEGG PATHWAY	ko00511	2	20	0.04589	0.355648	ZHLZ.comp25006_c0_seq1|ZHLZ.comp51403_c0_seq2|	http://www.genome.jp/kegg-bin/show_pathway?ko00511
	KEGG PATHWAY	ko00513	1	83	0.9999	0.9999	ZHLZ.comp25006_c0_seq1|	http://www.genome.jp/kegg-bin/show_pathway?ko00513
	KEGG PATHWAY	ko00520	15	260	6.625e-05	0.00231047	ZHLZ.comp25006_c0_seq1|ZHLZ.comp26771_c0_seq1|ZHLZ.comp26996_c0_seq1|ZHLZ.comp39519_c0_seq1|ZHLZ.comp44096_c0_seq1|ZHLZ.comp48606_c0_seq1|ZHLZ.comp48606_c0_seq2|ZHLZ.comp48766_c0_seq1|ZHLZ.comp48859_c0_seq1|ZHLZ.comp51304_c0_seq1|ZHLZ.comp51884_c0_seq1|ZHLZ.comp52113_c0_seq3|ZHLZ.comp52555_c0_seq1|ZHLZ.comp53114_c0_seq1|ZHLZ.comp54095_c0_seq1|ZHLZ.comp54791_c0_seq1|ZHLZ.comp56716_c0_seq1|ZHLZ.com…	http://www.genome.jp/kegg-bin/show_pathway?ko00520
	KEGG PATHWAY	ko00521	1	43	0.5254	0.9999	ZHLZ.comp54096_c0_seq1|	http://www.genome.jp/kegg-bin/show_pathway?ko00521
	KEGG PATHWAY	ko00531	3	43	0.03791	0.346919	ZHLZ.comp25006_c0_seq1|ZHLZ.comp48524_c0_seq1|ZHLZ.comp55877_c0_seq1|	http://www.genome.jp/kegg-bin/show_pathway?ko00531
	KEGG PATHWAY	ko00561	5	114	0.04823	0.36368	ZHLZ.comp26932_c0_seq1|ZHLZ.comp44389_c0_seq1|ZHLZ.comp49792_c0_seq1|ZHLZ.comp49797_c0_seq1|ZHLZ.comp55790_c0_seq1|ZHLZ.comp59675_c0_seq1|	http://www.genome.jp/kegg-bin/show_pathway?ko00561
	KEGG PATHWAY	ko00562	2	113	0.7208	0.9999	ZHLZ.comp53141_c0_seq1|ZHLZ.comp54096_c0_seq1|	http://www.genome.jp/kegg-bin/show_pathway?ko00562
	KEGG PATHWAY	ko00564	5	162	0.2082	0.754387	ZHLZ.comp26932_c0_seq1|ZHLZ.comp44389_c0_seq1|ZHLZ.comp53141_c0_seq1|ZHLZ.comp55452_c0_seq2|ZHLZ.comp55790_c0_seq1|ZHLZ.comp59915_c0_seq1|	http://www.genome.jp/kegg-bin/show_pathway?ko00564
	KEGG PATHWAY	ko00565	1	55	0.6144	0.9999	ZHLZ.comp53141_c0_seq1|	http://www.genome.jp/kegg-bin/show_pathway?ko00565
	KEGG PATHWAY	ko00591	2	54	0.2379	0.799688	ZHLZ.comp43895_c0_seq2|ZHLZ.comp47430_c1_seq1|ZHLZ.comp56023_c0_seq1|ZHLZ.comp58977_c0_seq1|ZHLZ.comp58977_c1_seq1|	http://www.genome.jp/kegg-bin/show_pathway?ko00591
	KEGG PATHWAY	ko00592	6	66	0.001006	0.0200481	ZHLZ.comp35501_c0_seq1|ZHLZ.comp48310_c1_seq1|ZHLZ.comp55606_c0_seq1|ZHLZ.comp56023_c0_seq1|ZHLZ.comp56608_c0_seq2|ZHLZ.comp58406_c1_seq1|ZHLZ.comp58406_c3_seq2|ZHLZ.comp58913_c0_seq1|	http://www.genome.jp/kegg-bin/show_pathway?ko00592
	KEGG PATHWAY	ko00600	2	67	0.3205	0.9615	ZHLZ.comp47129_c0_seq1|ZHLZ.comp54434_c1_seq1|	http://www.genome.jp/kegg-bin/show_pathway?ko00600
	KEGG PATHWAY	ko00603	1	38	0.4825	0.9999	ZHLZ.comp25006_c0_seq1|	http://www.genome.jp/kegg-bin/show_pathway?ko00603
	KEGG PATHWAY	ko00604	1	46	0.5494	0.9999	ZHLZ.comp25006_c0_seq1|	http://www.genome.jp/kegg-bin/show_pathway?ko00604
	KEGG PATHWAY	ko00620	3	128	0.4859	0.9999	ZHLZ.comp27189_c0_seq1|ZHLZ.comp48518_c0_seq1|ZHLZ.comp49797_c0_seq1|	http://www.genome.jp/kegg-bin/show_pathway?ko00620
	KEGG PATHWAY	ko00623	1	94	0.9999	0.9999	ZHLZ.comp35571_c1_seq1|	http://www.genome.jp/kegg-bin/show_pathway?ko00623
	KEGG PATHWAY	ko00625	2	73	0.358	0.969728	ZHLZ.comp49797_c0_seq1|ZHLZ.comp58329_c1_seq2|	http://www.genome.jp/kegg-bin/show_pathway?ko00625
	KEGG PATHWAY	ko00626	1	90	0.9999	0.9999	ZHLZ.comp58329_c1_seq2|	http://www.genome.jp/kegg-bin/show_pathway?ko00626
	KEGG PATHWAY	ko00630	1	156	0.5282	0.9999	ZHLZ.comp59437_c0_seq1|	http://www.genome.jp/kegg-bin/show_pathway?ko00630
	KEGG PATHWAY	ko00640	1	149	0.525	0.9999	ZHLZ.comp48518_c0_seq1|	http://www.genome.jp/kegg-bin/show_pathway?ko00640
	KEGG PATHWAY	ko00680	4	249	0.9999	0.9999	ZHLZ.comp26910_c0_seq1|ZHLZ.comp35381_c0_seq1|ZHLZ.comp46813_c0_seq1|ZHLZ.comp46813_c1_seq1|ZHLZ.comp48518_c0_seq1|ZHLZ.comp50340_c0_seq1|	http://www.genome.jp/kegg-bin/show_pathway?ko00680
	KEGG PATHWAY	ko00710	1	60	0.9999	0.9999	ZHLZ.comp35381_c0_seq1|ZHLZ.comp50340_c0_seq1|	http://www.genome.jp/kegg-bin/show_pathway?ko00710
	KEGG PATHWAY	ko00720	2	148	0.9999	0.9999	ZHLZ.comp48518_c0_seq1|ZHLZ.comp59542_c0_seq1|	http://www.genome.jp/kegg-bin/show_pathway?ko00720
	KEGG PATHWAY	ko00730	1	65	0.9999	0.9999	ZHLZ.comp58022_c0_seq5|	http://www.genome.jp/kegg-bin/show_pathway?ko00730
	KEGG PATHWAY	ko00780	1	52	0.5938	0.9999	ZHLZ.comp55471_c0_seq1|	http://www.genome.jp/kegg-bin/show_pathway?ko00780
	KEGG PATHWAY	ko00790	1	99	0.9999	0.9999	ZHLZ.comp49280_c0_seq1|	http://www.genome.jp/kegg-bin/show_pathway?ko00790
	KEGG PATHWAY	ko00830	1	73	0.9999	0.9999	ZHLZ.comp58329_c1_seq2|	http://www.genome.jp/kegg-bin/show_pathway?ko00830
	KEGG PATHWAY	ko00860	2	263	0.3346	0.964224	ZHLZ.comp35595_c0_seq1|ZHLZ.comp46526_c0_seq1|	http://www.genome.jp/kegg-bin/show_pathway?ko00860
	KEGG PATHWAY	ko00900	5	103	0.03349	0.346919	ZHLZ.comp27339_c0_seq1|ZHLZ.comp43393_c0_seq1|ZHLZ.comp44518_c0_seq1|ZHLZ.comp48554_c0_seq1|ZHLZ.comp58022_c0_seq5|ZHLZ.comp59688_c0_seq1|	http://www.genome.jp/kegg-bin/show_pathway?ko00900
	KEGG PATHWAY	ko00902	2	84	0.6571	0.9999	ZHLZ.comp43081_c0_seq1|ZHLZ.comp55105_c0_seq1|ZHLZ.comp55105_c1_seq1|	http://www.genome.jp/kegg-bin/show_pathway?ko00902
	KEGG PATHWAY	ko00903	1	77	0.9999	0.9999	ZHLZ.comp49797_c0_seq1|	http://www.genome.jp/kegg-bin/show_pathway?ko00903
	KEGG PATHWAY	ko00904	2	156	0.9999	0.9999	ZHLZ.comp51534_c0_seq1|ZHLZ.comp52510_c0_seq2|ZHLZ.comp58775_c0_seq39|	http://www.genome.jp/kegg-bin/show_pathway?ko00904
	KEGG PATHWAY	ko00905	2	41	0.1569	0.683986	ZHLZ.comp170856_c0_seq1|ZHLZ.comp47622_c1_seq1|ZHLZ.comp52102_c1_seq1|	http://www.genome.jp/kegg-bin/show_pathway?ko00905
	KEGG PATHWAY	ko00906	1	162	0.5325	0.9999	ZHLZ.comp59016_c0_seq1|	http://www.genome.jp/kegg-bin/show_pathway?ko00906
	KEGG PATHWAY	ko00909	3	160	0.7563	0.9999	ZHLZ.comp27339_c0_seq1|ZHLZ.comp55773_c0_seq1|ZHLZ.comp57200_c0_seq1|	http://www.genome.jp/kegg-bin/show_pathway?ko00909
	KEGG PATHWAY	ko00910	1	80	0.9999	0.9999	ZHLZ.comp50706_c0_seq1|	http://www.genome.jp/kegg-bin/show_pathway?ko00910
	KEGG PATHWAY	ko00920	1	132	0.7305	0.9999	ZHLZ.comp60725_c0_seq1|	http://www.genome.jp/kegg-bin/show_pathway?ko00920
	KEGG PATHWAY	ko00940	13	101	2.775e-08	2.58075e-06	CL219Contig1|ZHLZ.comp26845_c0_seq1|ZHLZ.comp27255_c0_seq1|ZHLZ.comp27255_c1_seq1|ZHLZ.comp35408_c0_seq1|ZHLZ.comp35603_c0_seq1|ZHLZ.comp36142_c0_seq1|ZHLZ.comp47439_c0_seq1|ZHLZ.comp48308_c0_seq1|ZHLZ.comp48702_c0_seq1|ZHLZ.comp48702_c1_seq1|ZHLZ.comp49009_c0_seq1|ZHLZ.comp49432_c0_seq1|ZHLZ.comp50377_c0_seq1|ZHLZ.comp51076_c0_seq1|ZHLZ.comp52787_c0_seq1|ZHLZ.comp53469_c0_seq1|ZHLZ.comp53469_c0_…	http://www.genome.jp/kegg-bin/show_pathway?ko00940
	KEGG PATHWAY	ko00941	5	91	0.02104	0.266825	ZHLZ.comp27950_c0_seq1|ZHLZ.comp54051_c0_seq1|ZHLZ.comp56208_c1_seq1|ZHLZ.comp56208_c2_seq1|ZHLZ.comp58732_c7_seq34|ZHLZ.comp60846_c0_seq1|ZHLZ.comp60856_c0_seq1|	http://www.genome.jp/kegg-bin/show_pathway?ko00941
	KEGG PATHWAY	ko00944	1	62	0.9999	0.9999	ZHLZ.comp56208_c1_seq1|ZHLZ.comp56208_c2_seq1|	http://www.genome.jp/kegg-bin/show_pathway?ko00944
	KEGG PATHWAY	ko00945	3	38	0.0276	0.32085	ZHLZ.comp54051_c0_seq1|ZHLZ.comp58732_c7_seq34|ZHLZ.comp60856_c0_seq1|	http://www.genome.jp/kegg-bin/show_pathway?ko00945
	KEGG PATHWAY	ko00950	3	139	0.5175	0.9999	ZHLZ.comp26963_c0_seq1|ZHLZ.comp47117_c0_seq1|ZHLZ.comp49194_c0_seq1|	http://www.genome.jp/kegg-bin/show_pathway?ko00950
	KEGG PATHWAY	ko00960	1	95	0.9999	0.9999	ZHLZ.comp49194_c0_seq1|	http://www.genome.jp/kegg-bin/show_pathway?ko00960
	KEGG PATHWAY	ko00965	1	32	0.4258	0.9999	ZHLZ.comp47117_c0_seq1|	http://www.genome.jp/kegg-bin/show_pathway?ko00965
	KEGG PATHWAY	ko00980	2	155	0.9999	0.9999	ZHLZ.comp27514_c0_seq1|ZHLZ.comp35384_c0_seq1|ZHLZ.comp35980_c0_seq1|ZHLZ.comp45740_c0_seq1|ZHLZ.comp47918_c0_seq1|ZHLZ.comp47918_c1_seq1|ZHLZ.comp49125_c2_seq1|ZHLZ.comp54113_c0_seq1|ZHLZ.comp58329_c1_seq2|ZHLZ.comp59593_c0_seq1|ZHLZ.comp86401_c0_seq1|	http://www.genome.jp/kegg-bin/show_pathway?ko00980
	KEGG PATHWAY	ko00981	1	44	0.5335	0.9999	ZHLZ.comp49797_c0_seq1|	http://www.genome.jp/kegg-bin/show_pathway?ko00981
	KEGG PATHWAY	ko00982	3	125	0.4777	0.9999	ZHLZ.comp27514_c0_seq1|ZHLZ.comp27757_c0_seq1|ZHLZ.comp35384_c0_seq1|ZHLZ.comp35980_c0_seq1|ZHLZ.comp45740_c0_seq1|ZHLZ.comp47918_c0_seq1|ZHLZ.comp47918_c1_seq1|ZHLZ.comp49125_c2_seq1|ZHLZ.comp54113_c0_seq1|ZHLZ.comp58329_c1_seq2|ZHLZ.comp59593_c0_seq1|ZHLZ.comp86401_c0_seq1|	http://www.genome.jp/kegg-bin/show_pathway?ko00982
	KEGG PATHWAY	ko01040	5	82	0.01401	0.204089	ZHLZ.comp53444_c0_seq1|ZHLZ.comp53640_c0_seq1|ZHLZ.comp53640_c1_seq1|ZHLZ.comp55471_c0_seq1|ZHLZ.comp55945_c1_seq1|ZHLZ.comp55945_c1_seq2|ZHLZ.comp58913_c0_seq1|ZHLZ.comp59684_c0_seq1|	http://www.genome.jp/kegg-bin/show_pathway?ko01040
	KEGG PATHWAY	ko01100	110	4666	0.004923	0.0915678	CL219Contig1|CL2317Contig1|ZHLZ.comp170856_c0_seq1|ZHLZ.comp25006_c0_seq1|ZHLZ.comp26845_c0_seq1|ZHLZ.comp26910_c0_seq1|ZHLZ.comp26931_c0_seq2|ZHLZ.comp26932_c0_seq1|ZHLZ.comp26963_c0_seq1|ZHLZ.comp26992_c1_seq1|ZHLZ.comp26996_c0_seq1|ZHLZ.comp27049_c0_seq1|ZHLZ.comp27189_c0_seq1|ZHLZ.comp27255_c0_seq1|ZHLZ.comp27255_c1_seq1|ZHLZ.comp27256_c0_seq1|ZHLZ.comp27372_c0_seq1|ZHLZ.comp27950_c0_seq1|ZHL…	http://www.genome.jp/kegg-bin/show_pathway?ko01100
	KEGG PATHWAY	ko01110	69	2131	6.131e-06	0.000285092	CL219Contig1|ZHLZ.comp170856_c0_seq1|ZHLZ.comp26845_c0_seq1|ZHLZ.comp26910_c0_seq1|ZHLZ.comp26932_c0_seq1|ZHLZ.comp26963_c0_seq1|ZHLZ.comp27049_c0_seq1|ZHLZ.comp27081_c0_seq1|ZHLZ.comp27189_c0_seq1|ZHLZ.comp27255_c0_seq1|ZHLZ.comp27255_c1_seq1|ZHLZ.comp27950_c0_seq1|ZHLZ.comp35317_c0_seq1|ZHLZ.comp35381_c0_seq1|ZHLZ.comp35501_c0_seq1|ZHLZ.comp35516_c0_seq1|ZHLZ.comp35516_c1_seq1|ZHLZ.comp35516_c2…	http://www.genome.jp/kegg-bin/show_pathway?ko01110
	KEGG PATHWAY	ko01120	14	2069	0.0001348	0.0041788	ZHLZ.comp26910_c0_seq1|ZHLZ.comp27189_c0_seq1|ZHLZ.comp27757_c0_seq1|ZHLZ.comp35317_c0_seq1|ZHLZ.comp35381_c0_seq1|ZHLZ.comp35571_c1_seq1|ZHLZ.comp43206_c0_seq1|ZHLZ.comp45005_c0_seq1|ZHLZ.comp461284_c0_seq1|ZHLZ.comp46813_c0_seq1|ZHLZ.comp46813_c1_seq1|ZHLZ.comp48310_c1_seq1|ZHLZ.comp48518_c0_seq1|ZHLZ.comp49797_c0_seq1|ZHLZ.comp50340_c0_seq1|ZHLZ.comp50706_c0_seq1|ZHLZ.comp53995_c0_seq1|ZHLZ.co…	http://www.genome.jp/kegg-bin/show_pathway?ko01120
	KEGG PATHWAY	ko01130	25	1919	0.2228	0.777015	ZHLZ.comp26910_c0_seq1|ZHLZ.comp27049_c0_seq1|ZHLZ.comp27189_c0_seq1|ZHLZ.comp27339_c0_seq1|ZHLZ.comp35381_c0_seq1|ZHLZ.comp35571_c1_seq1|ZHLZ.comp40126_c0_seq1|ZHLZ.comp40126_c1_seq1|ZHLZ.comp40126_c2_seq1|ZHLZ.comp43393_c0_seq1|ZHLZ.comp44096_c0_seq1|ZHLZ.comp44518_c0_seq1|ZHLZ.comp46429_c0_seq1|ZHLZ.comp46813_c0_seq1|ZHLZ.comp46813_c1_seq1|ZHLZ.comp48411_c1_seq1|ZHLZ.comp48518_c0_seq1|ZHLZ.com…	http://www.genome.jp/kegg-bin/show_pathway?ko01130
	KEGG PATHWAY	ko01200	7	452	0.9999	0.9999	ZHLZ.comp26910_c0_seq1|ZHLZ.comp27189_c0_seq1|ZHLZ.comp35381_c0_seq1|ZHLZ.comp46813_c0_seq1|ZHLZ.comp46813_c1_seq1|ZHLZ.comp48518_c0_seq1|ZHLZ.comp50340_c0_seq1|ZHLZ.comp59437_c0_seq1|ZHLZ.comp60725_c0_seq1|	http://www.genome.jp/kegg-bin/show_pathway?ko01200
	KEGG PATHWAY	ko01212	7	177	0.03522	0.346919	ZHLZ.comp45166_c0_seq1|ZHLZ.comp50138_c0_seq1|ZHLZ.comp53444_c0_seq1|ZHLZ.comp53640_c0_seq1|ZHLZ.comp53640_c1_seq1|ZHLZ.comp55471_c0_seq1|ZHLZ.comp55945_c1_seq1|ZHLZ.comp55945_c1_seq2|ZHLZ.comp56608_c0_seq2|ZHLZ.comp58913_c0_seq1|ZHLZ.comp59684_c0_seq1|	http://www.genome.jp/kegg-bin/show_pathway?ko01212
	KEGG PATHWAY	ko01220	2	466	0.02696	0.32085	ZHLZ.comp54051_c0_seq1|ZHLZ.comp58329_c1_seq2|	http://www.genome.jp/kegg-bin/show_pathway?ko01220
	KEGG PATHWAY	ko01230	11	352	0.05938	0.424795	ZHLZ.comp26910_c0_seq1|ZHLZ.comp27049_c0_seq1|ZHLZ.comp35381_c0_seq1|ZHLZ.comp35516_c0_seq1|ZHLZ.comp35516_c1_seq1|ZHLZ.comp35516_c2_seq1|ZHLZ.comp46429_c0_seq1|ZHLZ.comp46813_c0_seq1|ZHLZ.comp46813_c1_seq1|ZHLZ.comp48411_c1_seq1|ZHLZ.comp49194_c0_seq1|ZHLZ.comp50340_c0_seq1|ZHLZ.comp53251_c0_seq1|ZHLZ.comp57462_c0_seq1|ZHLZ.comp57462_c1_seq1|ZHLZ.comp57462_c1_seq2|ZHLZ.comp57462_c2_seq2|ZHLZ.com…	http://www.genome.jp/kegg-bin/show_pathway?ko01230
	KEGG PATHWAY	ko01521	1	72	0.9999	0.9999	ZHLZ.comp55656_c0_seq1|	http://www.genome.jp/kegg-bin/show_pathway?ko01521
	KEGG PATHWAY	ko01522	1	88	0.9999	0.9999	ZHLZ.comp55656_c0_seq1|	http://www.genome.jp/kegg-bin/show_pathway?ko01522
	KEGG PATHWAY	ko01523	1	55	0.6144	0.9999	ZHLZ.comp49280_c0_seq1|	http://www.genome.jp/kegg-bin/show_pathway?ko01523
	KEGG PATHWAY	ko01524	2	49	0.2063	0.754387	ZHLZ.comp27514_c0_seq1|ZHLZ.comp35384_c0_seq1|ZHLZ.comp35980_c0_seq1|ZHLZ.comp45740_c0_seq1|ZHLZ.comp47918_c0_seq1|ZHLZ.comp47918_c1_seq1|ZHLZ.comp48129_c0_seq1|ZHLZ.comp49125_c2_seq1|ZHLZ.comp52627_c0_seq1|ZHLZ.comp54113_c0_seq1|ZHLZ.comp59593_c0_seq1|ZHLZ.comp86401_c0_seq1|	http://www.genome.jp/kegg-bin/show_pathway?ko01524
	KEGG PATHWAY	ko02010	1	606	0.0009228	0.0198047	ZHLZ.comp55992_c0_seq1|ZHLZ.comp56603_c3_seq1|	http://www.genome.jp/kegg-bin/show_pathway?ko02010
	KEGG PATHWAY	ko02024	4	338	0.6685	0.9999	ZHLZ.comp44600_c1_seq1|ZHLZ.comp44600_c3_seq1|ZHLZ.comp45166_c0_seq1|ZHLZ.comp47058_c0_seq1|ZHLZ.comp48411_c1_seq1|ZHLZ.comp50138_c0_seq1|ZHLZ.comp53141_c0_seq1|ZHLZ.comp53344_c0_seq1|ZHLZ.comp81686_c0_seq1|	http://www.genome.jp/kegg-bin/show_pathway?ko02024
	KEGG PATHWAY	ko03008	1	83	0.9999	0.9999	ZHLZ.comp48476_c0_seq1|	http://www.genome.jp/kegg-bin/show_pathway?ko03008
	KEGG PATHWAY	ko03010	5	144	0.1048	0.562292	ZHLZ.comp26939_c0_seq1|ZHLZ.comp35306_c0_seq1|ZHLZ.comp48374_c0_seq2|ZHLZ.comp48642_c0_seq3|ZHLZ.comp50549_c0_seq1|	http://www.genome.jp/kegg-bin/show_pathway?ko03010
	KEGG PATHWAY	ko03013	1	142	0.7373	0.9999	ZHLZ.comp43419_c0_seq1|ZHLZ.comp48028_c0_seq1|	http://www.genome.jp/kegg-bin/show_pathway?ko03013
	KEGG PATHWAY	ko03018	3	79	0.1557	0.683986	ZHLZ.comp26910_c0_seq1|ZHLZ.comp46813_c0_seq1|ZHLZ.comp46813_c1_seq1|ZHLZ.comp50439_c0_seq1|	http://www.genome.jp/kegg-bin/show_pathway?ko03018
	KEGG PATHWAY	ko03040	1	123	0.7269	0.9999	ZHLZ.comp48476_c0_seq1|	http://www.genome.jp/kegg-bin/show_pathway?ko03040
	KEGG PATHWAY	ko03060	2	40	0.1508	0.6786	ZHLZ.comp27082_c0_seq1|ZHLZ.comp51440_c1_seq1|	http://www.genome.jp/kegg-bin/show_pathway?ko03060
	KEGG PATHWAY	ko03070	1	76	0.9999	0.9999	ZHLZ.comp27082_c0_seq1|	http://www.genome.jp/kegg-bin/show_pathway?ko03070
	KEGG PATHWAY	ko03320	3	67	0.1092	0.5642	ZHLZ.comp26959_c1_seq1|ZHLZ.comp45166_c0_seq1|ZHLZ.comp45313_c1_seq1|ZHLZ.comp50138_c0_seq1|ZHLZ.comp56138_c0_seq4|ZHLZ.comp58913_c0_seq1|	http://www.genome.jp/kegg-bin/show_pathway?ko03320
	KEGG PATHWAY	ko03440	1	73	0.9999	0.9999	ZHLZ.comp56959_c0_seq20|	http://www.genome.jp/kegg-bin/show_pathway?ko03440
	KEGG PATHWAY	ko03460	1	55	0.6144	0.9999	ZHLZ.comp56959_c0_seq20|	http://www.genome.jp/kegg-bin/show_pathway?ko03460
	KEGG PATHWAY	ko04010	1	199	0.2694	0.863938	ZHLZ.comp55656_c0_seq1|	http://www.genome.jp/kegg-bin/show_pathway?ko04010
	KEGG PATHWAY	ko04011	2	91	0.6709	0.9999	ZHLZ.comp55452_c0_seq2|ZHLZ.comp59437_c0_seq1|	http://www.genome.jp/kegg-bin/show_pathway?ko04011
	KEGG PATHWAY	ko04012	1	73	0.9999	0.9999	ZHLZ.comp55656_c0_seq1|	http://www.genome.jp/kegg-bin/show_pathway?ko04012
	KEGG PATHWAY	ko04013	2	85	0.6589	0.9999	ZHLZ.comp55656_c0_seq1|ZHLZ.comp62979_c0_seq1|	http://www.genome.jp/kegg-bin/show_pathway?ko04013
	KEGG PATHWAY	ko04014	2	175	0.7729	0.9999	ZHLZ.comp55656_c0_seq1|ZHLZ.comp57119_c7_seq1|ZHLZ.comp57119_c8_seq1|	http://www.genome.jp/kegg-bin/show_pathway?ko04014
	KEGG PATHWAY	ko04015	4	162	0.3642	0.972367	ZHLZ.comp45601_c0_seq1|ZHLZ.comp55656_c0_seq1|ZHLZ.comp57119_c7_seq1|ZHLZ.comp57119_c8_seq1|ZHLZ.comp62979_c0_seq1|	http://www.genome.jp/kegg-bin/show_pathway?ko04015
	KEGG PATHWAY	ko04016	8	55	4.872e-06	0.000271858	ZHLZ.comp34739_c0_seq1|ZHLZ.comp37110_c1_seq1|ZHLZ.comp48606_c0_seq1|ZHLZ.comp48606_c0_seq2|ZHLZ.comp49930_c0_seq1|ZHLZ.comp52555_c0_seq1|ZHLZ.comp54170_c0_seq1|ZHLZ.comp54945_c0_seq1|ZHLZ.comp54945_c1_seq2|ZHLZ.comp55986_c0_seq1|ZHLZ.comp56670_c0_seq1|ZHLZ.comp57119_c7_seq1|ZHLZ.comp57119_c8_seq1|ZHLZ.comp59437_c0_seq1|	http://www.genome.jp/kegg-bin/show_pathway?ko04016
	KEGG PATHWAY	ko04020	2	153	0.9999	0.9999	ZHLZ.comp54434_c1_seq1|ZHLZ.comp57119_c7_seq1|ZHLZ.comp57119_c8_seq1|	http://www.genome.jp/kegg-bin/show_pathway?ko04020
	KEGG PATHWAY	ko04022	2	132	0.9999	0.9999	ZHLZ.comp55656_c0_seq1|ZHLZ.comp57119_c7_seq1|ZHLZ.comp57119_c8_seq1|	http://www.genome.jp/kegg-bin/show_pathway?ko04022
	KEGG PATHWAY	ko04024	3	187	0.9999	0.9999	ZHLZ.comp55656_c0_seq1|ZHLZ.comp57119_c7_seq1|ZHLZ.comp57119_c8_seq1|ZHLZ.comp58913_c0_seq1|	http://www.genome.jp/kegg-bin/show_pathway?ko04024
	KEGG PATHWAY	ko04062	1	159	0.5302	0.9999	ZHLZ.comp55656_c0_seq1|	http://www.genome.jp/kegg-bin/show_pathway?ko04062
	KEGG PATHWAY	ko04064	1	93	0.9999	0.9999	ZHLZ.comp54220_c0_seq2|	http://www.genome.jp/kegg-bin/show_pathway?ko04064
	KEGG PATHWAY	ko04066	3	87	0.1895	0.744655	ZHLZ.comp27189_c0_seq1|ZHLZ.comp46813_c0_seq1|ZHLZ.comp46813_c1_seq1|ZHLZ.comp55656_c0_seq1|	http://www.genome.jp/kegg-bin/show_pathway?ko04066
	KEGG PATHWAY	ko04068	3	107	0.4352	0.9999	ZHLZ.comp52586_c0_seq1|ZHLZ.comp52586_c1_seq1|ZHLZ.comp55656_c0_seq1|ZHLZ.comp59437_c0_seq1|	http://www.genome.jp/kegg-bin/show_pathway?ko04068
	KEGG PATHWAY	ko04070	2	85	0.6589	0.9999	ZHLZ.comp55790_c0_seq1|ZHLZ.comp57119_c7_seq1|ZHLZ.comp57119_c8_seq1|	http://www.genome.jp/kegg-bin/show_pathway?ko04070
	KEGG PATHWAY	ko04071	2	95	0.6794	0.9999	ZHLZ.comp54434_c1_seq1|ZHLZ.comp55656_c0_seq1|	http://www.genome.jp/kegg-bin/show_pathway?ko04071
	KEGG PATHWAY	ko04072	4	116	0.1411	0.656115	ZHLZ.comp46207_c0_seq1|ZHLZ.comp54434_c1_seq1|ZHLZ.comp55656_c0_seq1|ZHLZ.comp55790_c0_seq1|	http://www.genome.jp/kegg-bin/show_pathway?ko04072
	KEGG PATHWAY	ko04075	18	58	2.2e-16	6.138e-14	ZHLZ.comp122381_c0_seq1|ZHLZ.comp27317_c0_seq1|ZHLZ.comp273759_c0_seq1|ZHLZ.comp34739_c0_seq1|ZHLZ.comp34762_c0_seq1|ZHLZ.comp35187_c2_seq1|ZHLZ.comp36172_c0_seq1|ZHLZ.comp37110_c1_seq1|ZHLZ.comp37429_c0_seq1|ZHLZ.comp37656_c0_seq1|ZHLZ.comp45259_c0_seq1|ZHLZ.comp46972_c0_seq1|ZHLZ.comp47274_c0_seq1|ZHLZ.comp48813_c0_seq1|ZHLZ.comp49423_c0_seq1|ZHLZ.comp49441_c0_seq1|ZHLZ.comp49688_c0_seq1|ZHLZ.c…	http://www.genome.jp/kegg-bin/show_pathway?ko04075
	KEGG PATHWAY	ko04110	2	110	0.7137	0.9999	ZHLZ.comp34892_c0_seq1|ZHLZ.comp52690_c0_seq1|	http://www.genome.jp/kegg-bin/show_pathway?ko04110
	KEGG PATHWAY	ko04111	2	125	0.9999	0.9999	ZHLZ.comp34892_c0_seq1|ZHLZ.comp52690_c0_seq1|	http://www.genome.jp/kegg-bin/show_pathway?ko04111
	KEGG PATHWAY	ko04113	1	103	0.9999	0.9999	ZHLZ.comp34892_c0_seq1|	http://www.genome.jp/kegg-bin/show_pathway?ko04113
	KEGG PATHWAY	ko04114	4	83	0.05573	0.409176	ZHLZ.comp34892_c0_seq1|ZHLZ.comp52690_c0_seq1|ZHLZ.comp55656_c0_seq1|ZHLZ.comp57119_c7_seq1|ZHLZ.comp57119_c8_seq1|	http://www.genome.jp/kegg-bin/show_pathway?ko04114
	KEGG PATHWAY	ko04120	4	126	0.1734	0.724579	ZHLZ.comp34892_c0_seq1|ZHLZ.comp52690_c0_seq1|ZHLZ.comp53194_c0_seq2|ZHLZ.comp59066_c0_seq1|	http://www.genome.jp/kegg-bin/show_pathway?ko04120
	KEGG PATHWAY	ko04140	3	105	0.4314	0.9999	ZHLZ.comp52586_c0_seq1|ZHLZ.comp52586_c1_seq1|ZHLZ.comp54154_c0_seq1|ZHLZ.comp55656_c0_seq1|	http://www.genome.jp/kegg-bin/show_pathway?ko04140
	KEGG PATHWAY	ko04141	6	147	0.04318	0.355648	ZHLZ.comp26953_c0_seq1|ZHLZ.comp45792_c0_seq1|ZHLZ.comp47898_c2_seq1|ZHLZ.comp48653_c0_seq1|ZHLZ.comp51440_c1_seq1|ZHLZ.comp52163_c0_seq1|ZHLZ.comp52690_c0_seq1|ZHLZ.comp52747_c0_seq1|ZHLZ.comp58876_c1_seq2|ZHLZ.comp59849_c0_seq1|	http://www.genome.jp/kegg-bin/show_pathway?ko04141
	KEGG PATHWAY	ko04142	8	108	0.0006198	0.0154147	ZHLZ.comp25006_c0_seq1|ZHLZ.comp26993_c0_seq1|ZHLZ.comp35684_c0_seq1|ZHLZ.comp37137_c0_seq1|ZHLZ.comp47672_c0_seq1|ZHLZ.comp48038_c0_seq1|ZHLZ.comp54154_c0_seq1|ZHLZ.comp55877_c0_seq1|ZHLZ.comp60313_c0_seq1|	http://www.genome.jp/kegg-bin/show_pathway?ko04142
	KEGG PATHWAY	ko04144	3	185	0.9999	0.9999	ZHLZ.comp27128_c0_seq1|ZHLZ.comp46207_c0_seq1|ZHLZ.comp50471_c0_seq1|ZHLZ.comp59813_c0_seq1|	http://www.genome.jp/kegg-bin/show_pathway?ko04144
	KEGG PATHWAY	ko04145	3	97	0.234	0.799688	ZHLZ.comp26953_c0_seq1|ZHLZ.comp45601_c0_seq1|ZHLZ.comp52640_c0_seq1|ZHLZ.comp52640_c0_seq5|ZHLZ.comp55802_c0_seq14|ZHLZ.comp59849_c0_seq1|	http://www.genome.jp/kegg-bin/show_pathway?ko04145
	KEGG PATHWAY	ko04146	4	73	0.03771	0.346919	ZHLZ.comp44583_c0_seq1|ZHLZ.comp45166_c0_seq1|ZHLZ.comp50138_c0_seq1|ZHLZ.comp58913_c0_seq1|ZHLZ.comp59437_c0_seq1|	http://www.genome.jp/kegg-bin/show_pathway?ko04146
	KEGG PATHWAY	ko04150	2	118	0.9999	0.9999	ZHLZ.comp52586_c0_seq1|ZHLZ.comp52586_c1_seq1|ZHLZ.comp55656_c0_seq1|	http://www.genome.jp/kegg-bin/show_pathway?ko04150
	KEGG PATHWAY	ko04151	2	247	0.4508	0.9999	ZHLZ.comp52586_c0_seq1|ZHLZ.comp52586_c1_seq1|ZHLZ.comp55656_c0_seq1|	http://www.genome.jp/kegg-bin/show_pathway?ko04151
	KEGG PATHWAY	ko04152	5	108	0.03979	0.346919	ZHLZ.comp26910_c0_seq1|ZHLZ.comp43393_c0_seq1|ZHLZ.comp44518_c0_seq1|ZHLZ.comp52586_c0_seq1|ZHLZ.comp52586_c1_seq1|ZHLZ.comp56927_c0_seq1|ZHLZ.comp57998_c0_seq1|	http://www.genome.jp/kegg-bin/show_pathway?ko04152
	KEGG PATHWAY	ko04210	6	114	0.01463	0.204089	ZHLZ.comp37137_c0_seq1|ZHLZ.comp45601_c0_seq1|ZHLZ.comp48038_c0_seq1|ZHLZ.comp52640_c0_seq1|ZHLZ.comp52640_c0_seq5|ZHLZ.comp54154_c0_seq1|ZHLZ.comp55656_c0_seq1|ZHLZ.comp55802_c0_seq14|	http://www.genome.jp/kegg-bin/show_pathway?ko04210
	KEGG PATHWAY	ko04211	3	76	0.1435	0.656336	ZHLZ.comp52586_c0_seq1|ZHLZ.comp52586_c1_seq1|ZHLZ.comp56927_c0_seq1|ZHLZ.comp59437_c0_seq1|	http://www.genome.jp/kegg-bin/show_pathway?ko04211
	KEGG PATHWAY	ko04212	1	68	0.9999	0.9999	ZHLZ.comp59437_c0_seq1|	http://www.genome.jp/kegg-bin/show_pathway?ko04212
	KEGG PATHWAY	ko04213	3	61	0.08831	0.513302	ZHLZ.comp44583_c0_seq1|ZHLZ.comp52586_c0_seq1|ZHLZ.comp52586_c1_seq1|ZHLZ.comp59437_c0_seq1|	http://www.genome.jp/kegg-bin/show_pathway?ko04213
	KEGG PATHWAY	ko04216	2	65	0.3079	0.952846	ZHLZ.comp45166_c0_seq1|ZHLZ.comp46581_c0_seq1|ZHLZ.comp46581_c2_seq1|ZHLZ.comp50138_c0_seq1|ZHLZ.comp52763_c0_seq1|	http://www.genome.jp/kegg-bin/show_pathway?ko04216
	KEGG PATHWAY	ko04217	2	107	0.7067	0.9999	ZHLZ.comp35557_c0_seq1|ZHLZ.comp46581_c0_seq1|ZHLZ.comp46581_c2_seq1|ZHLZ.comp52763_c0_seq1|	http://www.genome.jp/kegg-bin/show_pathway?ko04217
	KEGG PATHWAY	ko04218	2	122	0.9999	0.9999	ZHLZ.comp55656_c0_seq1|ZHLZ.comp57119_c7_seq1|ZHLZ.comp57119_c8_seq1|	http://www.genome.jp/kegg-bin/show_pathway?ko04218
	KEGG PATHWAY	ko04261	1	104	0.9999	0.9999	ZHLZ.comp57119_c7_seq1|ZHLZ.comp57119_c8_seq1|	http://www.genome.jp/kegg-bin/show_pathway?ko04261
	KEGG PATHWAY	ko04270	2	113	0.7208	0.9999	ZHLZ.comp55656_c0_seq1|ZHLZ.comp57119_c7_seq1|ZHLZ.comp57119_c8_seq1|	http://www.genome.jp/kegg-bin/show_pathway?ko04270
	KEGG PATHWAY	ko04310	2	105	0.702	0.9999	ZHLZ.comp52690_c0_seq1|ZHLZ.comp56113_c0_seq1|	http://www.genome.jp/kegg-bin/show_pathway?ko04310
	KEGG PATHWAY	ko04320	1	28	0.3846	0.975485	ZHLZ.comp55656_c0_seq1|	http://www.genome.jp/kegg-bin/show_pathway?ko04320
	KEGG PATHWAY	ko04341	1	24	0.3404	0.964224	ZHLZ.comp52690_c0_seq1|	http://www.genome.jp/kegg-bin/show_pathway?ko04341
	KEGG PATHWAY	ko04350	1	71	0.9999	0.9999	ZHLZ.comp52690_c0_seq1|	http://www.genome.jp/kegg-bin/show_pathway?ko04350
	KEGG PATHWAY	ko04360	1	124	0.7272	0.9999	ZHLZ.comp24911_c0_seq1|ZHLZ.comp34083_c0_seq1|	http://www.genome.jp/kegg-bin/show_pathway?ko04360
	KEGG PATHWAY	ko04370	2	46	0.1875	0.744655	ZHLZ.comp54434_c1_seq1|ZHLZ.comp55656_c0_seq1|	http://www.genome.jp/kegg-bin/show_pathway?ko04370
	KEGG PATHWAY	ko04371	4	112	0.1288	0.619572	ZHLZ.comp52586_c0_seq1|ZHLZ.comp52586_c1_seq1|ZHLZ.comp54434_c1_seq1|ZHLZ.comp55656_c0_seq1|ZHLZ.comp57119_c7_seq1|ZHLZ.comp57119_c8_seq1|	http://www.genome.jp/kegg-bin/show_pathway?ko04371
	KEGG PATHWAY	ko04380	1	103	0.9999	0.9999	ZHLZ.comp55656_c0_seq1|	http://www.genome.jp/kegg-bin/show_pathway?ko04380
	KEGG PATHWAY	ko04390	1	112	0.9999	0.9999	ZHLZ.comp45601_c0_seq1|	http://www.genome.jp/kegg-bin/show_pathway?ko04390
	KEGG PATHWAY	ko04391	1	53	0.6008	0.9999	ZHLZ.comp45601_c0_seq1|	http://www.genome.jp/kegg-bin/show_pathway?ko04391
	KEGG PATHWAY	ko04510	2	151	0.9999	0.9999	ZHLZ.comp45601_c0_seq1|ZHLZ.comp55656_c0_seq1|	http://www.genome.jp/kegg-bin/show_pathway?ko04510
	KEGG PATHWAY	ko04520	1	61	0.9999	0.9999	ZHLZ.comp45601_c0_seq1|	http://www.genome.jp/kegg-bin/show_pathway?ko04520
	KEGG PATHWAY	ko04530	4	103	0.1031	0.562292	CL531Contig1|ZHLZ.comp45601_c0_seq1|ZHLZ.comp52586_c0_seq1|ZHLZ.comp52586_c1_seq1|ZHLZ.comp52640_c0_seq1|ZHLZ.comp52640_c0_seq5|ZHLZ.comp55802_c0_seq14|	http://www.genome.jp/kegg-bin/show_pathway?ko04530
	KEGG PATHWAY	ko04540	2	71	0.3456	0.964224	ZHLZ.comp52640_c0_seq1|ZHLZ.comp52640_c0_seq5|ZHLZ.comp55656_c0_seq1|ZHLZ.comp55802_c0_seq14|	http://www.genome.jp/kegg-bin/show_pathway?ko04540
	KEGG PATHWAY	ko04550	1	109	0.9999	0.9999	ZHLZ.comp55656_c0_seq1|	http://www.genome.jp/kegg-bin/show_pathway?ko04550
	KEGG PATHWAY	ko04611	1	104	0.9999	0.9999	ZHLZ.comp45601_c0_seq1|	http://www.genome.jp/kegg-bin/show_pathway?ko04611
	KEGG PATHWAY	ko04612	4	42	0.005898	0.102846	ZHLZ.comp26953_c0_seq1|ZHLZ.comp26993_c0_seq1|ZHLZ.comp32988_c0_seq1|ZHLZ.comp32988_c1_seq1|ZHLZ.comp54154_c0_seq1|ZHLZ.comp59849_c0_seq1|	http://www.genome.jp/kegg-bin/show_pathway?ko04612
	KEGG PATHWAY	ko04614	1	34	0.4453	0.9999	ZHLZ.comp43344_c0_seq1|	http://www.genome.jp/kegg-bin/show_pathway?ko04614
	KEGG PATHWAY	ko04620	2	77	0.3826	0.975485	ZHLZ.comp54220_c0_seq2|ZHLZ.comp55656_c0_seq1|	http://www.genome.jp/kegg-bin/show_pathway?ko04620
	KEGG PATHWAY	ko04621	1	152	0.5261	0.9999	ZHLZ.comp54154_c0_seq1|	http://www.genome.jp/kegg-bin/show_pathway?ko04621
	KEGG PATHWAY	ko04624	1	49	0.5722	0.9999	ZHLZ.comp54220_c0_seq2|	http://www.genome.jp/kegg-bin/show_pathway?ko04624
	KEGG PATHWAY	ko04626	7	84	0.000663	0.0154147	ZHLZ.comp36677_c0_seq1|ZHLZ.comp37110_c1_seq1|ZHLZ.comp47993_c2_seq1|ZHLZ.comp53768_c0_seq2|ZHLZ.comp55656_c0_seq1|ZHLZ.comp56670_c0_seq1|ZHLZ.comp57119_c7_seq1|ZHLZ.comp57119_c8_seq1|	http://www.genome.jp/kegg-bin/show_pathway?ko04626
	KEGG PATHWAY	ko04650	1	86	0.9999	0.9999	ZHLZ.comp55656_c0_seq1|	http://www.genome.jp/kegg-bin/show_pathway?ko04650
	KEGG PATHWAY	ko04660	1	90	0.9999	0.9999	ZHLZ.comp55656_c0_seq1|	http://www.genome.jp/kegg-bin/show_pathway?ko04660
	KEGG PATHWAY	ko04662	1	62	0.9999	0.9999	ZHLZ.comp55656_c0_seq1|	http://www.genome.jp/kegg-bin/show_pathway?ko04662
	KEGG PATHWAY	ko04664	1	59	0.9999	0.9999	ZHLZ.comp55656_c0_seq1|	http://www.genome.jp/kegg-bin/show_pathway?ko04664
	KEGG PATHWAY	ko04666	3	67	0.1092	0.5642	ZHLZ.comp24911_c0_seq1|ZHLZ.comp34083_c0_seq1|ZHLZ.comp54434_c1_seq1|ZHLZ.comp55656_c0_seq1|	http://www.genome.jp/kegg-bin/show_pathway?ko04666
	KEGG PATHWAY	ko04668	1	89	0.9999	0.9999	ZHLZ.comp55656_c0_seq1|	http://www.genome.jp/kegg-bin/show_pathway?ko04668
	KEGG PATHWAY	ko04670	1	80	0.9999	0.9999	ZHLZ.comp45601_c0_seq1|	http://www.genome.jp/kegg-bin/show_pathway?ko04670
	KEGG PATHWAY	ko04710	2	27	0.07837	0.496937	ZHLZ.comp52586_c0_seq1|ZHLZ.comp52586_c1_seq1|ZHLZ.comp52690_c0_seq1|	http://www.genome.jp/kegg-bin/show_pathway?ko04710
	KEGG PATHWAY	ko04712	3	28	0.01218	0.18879	ZHLZ.comp27950_c0_seq1|ZHLZ.comp39786_c0_seq1|ZHLZ.comp48479_c0_seq1|ZHLZ.comp60846_c0_seq1|	http://www.genome.jp/kegg-bin/show_pathway?ko04712
	KEGG PATHWAY	ko04713	1	90	0.9999	0.9999	ZHLZ.comp57119_c7_seq1|ZHLZ.comp57119_c8_seq1|	http://www.genome.jp/kegg-bin/show_pathway?ko04713
	KEGG PATHWAY	ko04720	2	51	0.2189	0.777015	ZHLZ.comp55656_c0_seq1|ZHLZ.comp57119_c7_seq1|ZHLZ.comp57119_c8_seq1|	http://www.genome.jp/kegg-bin/show_pathway?ko04720
	KEGG PATHWAY	ko04721	1	53	0.6008	0.9999	ZHLZ.comp37256_c0_seq1|ZHLZ.comp61057_c0_seq1|	http://www.genome.jp/kegg-bin/show_pathway?ko04721
	KEGG PATHWAY	ko04722	4	96	0.08488	0.513302	ZHLZ.comp52158_c2_seq1|ZHLZ.comp54220_c0_seq2|ZHLZ.comp55656_c0_seq1|ZHLZ.comp57119_c7_seq1|ZHLZ.comp57119_c8_seq1|	http://www.genome.jp/kegg-bin/show_pathway?ko04722
	KEGG PATHWAY	ko04723	2	139	0.9999	0.9999	ZHLZ.comp37256_c0_seq1|ZHLZ.comp59675_c0_seq1|ZHLZ.comp61057_c0_seq1|	http://www.genome.jp/kegg-bin/show_pathway?ko04723
	KEGG PATHWAY	ko04724	1	94	0.9999	0.9999	ZHLZ.comp46658_c1_seq1|	http://www.genome.jp/kegg-bin/show_pathway?ko04724
	KEGG PATHWAY	ko04725	1	102	0.9999	0.9999	ZHLZ.comp55656_c0_seq1|	http://www.genome.jp/kegg-bin/show_pathway?ko04725
	KEGG PATHWAY	ko04726	1	127	0.7282	0.9999	ZHLZ.comp55656_c0_seq1|	http://www.genome.jp/kegg-bin/show_pathway?ko04726
	KEGG PATHWAY	ko04727	2	75	0.3704	0.972367	ZHLZ.comp37256_c0_seq1|ZHLZ.comp46658_c1_seq1|ZHLZ.comp61057_c0_seq1|	http://www.genome.jp/kegg-bin/show_pathway?ko04727
	KEGG PATHWAY	ko04728	1	96	0.9999	0.9999	ZHLZ.comp57119_c7_seq1|ZHLZ.comp57119_c8_seq1|	http://www.genome.jp/kegg-bin/show_pathway?ko04728
	KEGG PATHWAY	ko04730	1	55	0.6144	0.9999	ZHLZ.comp55656_c0_seq1|	http://www.genome.jp/kegg-bin/show_pathway?ko04730
	KEGG PATHWAY	ko04740	1	34	0.4453	0.9999	ZHLZ.comp57119_c7_seq1|ZHLZ.comp57119_c8_seq1|	http://www.genome.jp/kegg-bin/show_pathway?ko04740
	KEGG PATHWAY	ko04744	1	27	0.3738	0.972367	ZHLZ.comp57119_c7_seq1|ZHLZ.comp57119_c8_seq1|	http://www.genome.jp/kegg-bin/show_pathway?ko04744
	KEGG PATHWAY	ko04745	2	30	0.09393	0.534826	ZHLZ.comp45601_c0_seq1|ZHLZ.comp57119_c7_seq1|ZHLZ.comp57119_c8_seq1|	http://www.genome.jp/kegg-bin/show_pathway?ko04745
	KEGG PATHWAY	ko04750	1	104	0.9999	0.9999	ZHLZ.comp57119_c7_seq1|ZHLZ.comp57119_c8_seq1|	http://www.genome.jp/kegg-bin/show_pathway?ko04750
	KEGG PATHWAY	ko04810	4	158	0.3531	0.969728	ZHLZ.comp24911_c0_seq1|ZHLZ.comp34083_c0_seq1|ZHLZ.comp45601_c0_seq1|ZHLZ.comp55656_c0_seq1|ZHLZ.comp62979_c0_seq1|	http://www.genome.jp/kegg-bin/show_pathway?ko04810
	KEGG PATHWAY	ko04910	3	91	0.2071	0.754387	ZHLZ.comp52586_c0_seq1|ZHLZ.comp52586_c1_seq1|ZHLZ.comp55656_c0_seq1|ZHLZ.comp57119_c7_seq1|ZHLZ.comp57119_c8_seq1|	http://www.genome.jp/kegg-bin/show_pathway?ko04910
	KEGG PATHWAY	ko04912	2	70	0.3394	0.964224	ZHLZ.comp55656_c0_seq1|ZHLZ.comp57119_c7_seq1|ZHLZ.comp57119_c8_seq1|	http://www.genome.jp/kegg-bin/show_pathway?ko04912
	KEGG PATHWAY	ko04914	2	69	0.3331	0.964224	ZHLZ.comp34892_c0_seq1|ZHLZ.comp55656_c0_seq1|	http://www.genome.jp/kegg-bin/show_pathway?ko04914
	KEGG PATHWAY	ko04915	2	75	0.3704	0.972367	ZHLZ.comp55656_c0_seq1|ZHLZ.comp57119_c7_seq1|ZHLZ.comp57119_c8_seq1|	http://www.genome.jp/kegg-bin/show_pathway?ko04915
	KEGG PATHWAY	ko04916	3	74	0.1356	0.641227	ZHLZ.comp47117_c0_seq1|ZHLZ.comp55656_c0_seq1|ZHLZ.comp57119_c7_seq1|ZHLZ.comp57119_c8_seq1|	http://www.genome.jp/kegg-bin/show_pathway?ko04916
	KEGG PATHWAY	ko04917	1	69	0.9999	0.9999	ZHLZ.comp55656_c0_seq1|	http://www.genome.jp/kegg-bin/show_pathway?ko04917
	KEGG PATHWAY	ko04918	1	74	0.9999	0.9999	ZHLZ.comp51440_c1_seq1|	http://www.genome.jp/kegg-bin/show_pathway?ko04918
	KEGG PATHWAY	ko04919	3	99	0.2431	0.807439	ZHLZ.comp45601_c0_seq1|ZHLZ.comp53141_c0_seq1|ZHLZ.comp55656_c0_seq1|	http://www.genome.jp/kegg-bin/show_pathway?ko04919
	KEGG PATHWAY	ko04920	3	61	0.08831	0.513302	ZHLZ.comp45166_c0_seq1|ZHLZ.comp50138_c0_seq1|ZHLZ.comp52586_c0_seq1|ZHLZ.comp52586_c1_seq1|ZHLZ.comp56927_c0_seq1|	http://www.genome.jp/kegg-bin/show_pathway?ko04920
	KEGG PATHWAY	ko04921	5	125	0.06622	0.43989	ZHLZ.comp45601_c0_seq1|ZHLZ.comp52586_c0_seq1|ZHLZ.comp52586_c1_seq1|ZHLZ.comp55656_c0_seq1|ZHLZ.comp57119_c7_seq1|ZHLZ.comp57119_c8_seq1|ZHLZ.comp57998_c0_seq1|	http://www.genome.jp/kegg-bin/show_pathway?ko04921
	KEGG PATHWAY	ko04922	3	82	0.1681	0.721537	ZHLZ.comp27189_c0_seq1|ZHLZ.comp52586_c0_seq1|ZHLZ.comp52586_c1_seq1|ZHLZ.comp57119_c7_seq1|ZHLZ.comp57119_c8_seq1|	http://www.genome.jp/kegg-bin/show_pathway?ko04922
	KEGG PATHWAY	ko04923	1	60	0.9999	0.9999	ZHLZ.comp59675_c0_seq1|	http://www.genome.jp/kegg-bin/show_pathway?ko04923
	KEGG PATHWAY	ko04924	2	68	0.3268	0.964224	ZHLZ.comp54154_c0_seq1|ZHLZ.comp57119_c7_seq1|ZHLZ.comp57119_c8_seq1|	http://www.genome.jp/kegg-bin/show_pathway?ko04924
	KEGG PATHWAY	ko04925	1	83	0.9999	0.9999	ZHLZ.comp57119_c7_seq1|ZHLZ.comp57119_c8_seq1|	http://www.genome.jp/kegg-bin/show_pathway?ko04925
	KEGG PATHWAY	ko04926	1	103	0.9999	0.9999	ZHLZ.comp55656_c0_seq1|	http://www.genome.jp/kegg-bin/show_pathway?ko04926
	KEGG PATHWAY	ko04931	3	94	0.2204	0.777015	ZHLZ.comp52586_c0_seq1|ZHLZ.comp52586_c1_seq1|ZHLZ.comp53114_c0_seq1|ZHLZ.comp55986_c0_seq1|	http://www.genome.jp/kegg-bin/show_pathway?ko04931
	KEGG PATHWAY	ko04932	2	127	0.9999	0.9999	ZHLZ.comp52586_c0_seq1|ZHLZ.comp52586_c1_seq1|ZHLZ.comp56927_c0_seq1|	http://www.genome.jp/kegg-bin/show_pathway?ko04932
	KEGG PATHWAY	ko04961	1	39	0.4914	0.9999	ZHLZ.comp50471_c0_seq1|ZHLZ.comp59813_c0_seq1|	http://www.genome.jp/kegg-bin/show_pathway?ko04961
	KEGG PATHWAY	ko04962	2	36	0.1273	0.619572	ZHLZ.comp50471_c0_seq1|ZHLZ.comp52158_c2_seq1|ZHLZ.comp59813_c0_seq1|	http://www.genome.jp/kegg-bin/show_pathway?ko04962
	KEGG PATHWAY	ko04970	1	81	0.9999	0.9999	ZHLZ.comp57119_c7_seq1|ZHLZ.comp57119_c8_seq1|	http://www.genome.jp/kegg-bin/show_pathway?ko04970
	KEGG PATHWAY	ko04971	1	64	0.9999	0.9999	ZHLZ.comp57119_c7_seq1|ZHLZ.comp57119_c8_seq1|	http://www.genome.jp/kegg-bin/show_pathway?ko04971
	KEGG PATHWAY	ko04972	1	83	0.9999	0.9999	ZHLZ.comp50471_c0_seq1|ZHLZ.comp59813_c0_seq1|	http://www.genome.jp/kegg-bin/show_pathway?ko04972
	KEGG PATHWAY	ko04973	1	49	0.5722	0.9999	ZHLZ.comp34958_c0_seq1|ZHLZ.comp52545_c0_seq1|	http://www.genome.jp/kegg-bin/show_pathway?ko04973
	KEGG PATHWAY	ko04974	1	104	0.9999	0.9999	ZHLZ.comp46658_c1_seq1|	http://www.genome.jp/kegg-bin/show_pathway?ko04974
	KEGG PATHWAY	ko04975	1	40	0.5001	0.9999	ZHLZ.comp49792_c0_seq1|	http://www.genome.jp/kegg-bin/show_pathway?ko04975
	KEGG PATHWAY	ko04976	2	235	0.4462	0.9999	ZHLZ.comp43393_c0_seq1|ZHLZ.comp44518_c0_seq1|ZHLZ.comp55992_c0_seq1|ZHLZ.comp56603_c3_seq1|	http://www.genome.jp/kegg-bin/show_pathway?ko04976
	KEGG PATHWAY	ko04978	2	61	0.2825	0.895653	ZHLZ.comp46581_c0_seq1|ZHLZ.comp46581_c2_seq1|ZHLZ.comp48129_c0_seq1|ZHLZ.comp52627_c0_seq1|ZHLZ.comp52763_c0_seq1|	http://www.genome.jp/kegg-bin/show_pathway?ko04978
	KEGG PATHWAY	ko05010	2	151	0.9999	0.9999	ZHLZ.comp41833_c0_seq1|ZHLZ.comp57119_c7_seq1|ZHLZ.comp57119_c8_seq1|	http://www.genome.jp/kegg-bin/show_pathway?ko05010
	KEGG PATHWAY	ko05012	1	137	0.7336	0.9999	ZHLZ.comp41833_c0_seq1|	http://www.genome.jp/kegg-bin/show_pathway?ko05012
	KEGG PATHWAY	ko05014	2	54	0.2379	0.799688	ZHLZ.comp44583_c0_seq1|ZHLZ.comp59437_c0_seq1|	http://www.genome.jp/kegg-bin/show_pathway?ko05014
	KEGG PATHWAY	ko05016	2	153	0.9999	0.9999	ZHLZ.comp41833_c0_seq1|ZHLZ.comp44583_c0_seq1|	http://www.genome.jp/kegg-bin/show_pathway?ko05016
	KEGG PATHWAY	ko05020	3	34	0.0206	0.266825	ZHLZ.comp44583_c0_seq1|ZHLZ.comp51440_c1_seq1|ZHLZ.comp55656_c0_seq1|	http://www.genome.jp/kegg-bin/show_pathway?ko05020
	KEGG PATHWAY	ko05031	1	56	0.621	0.9999	ZHLZ.comp57119_c7_seq1|ZHLZ.comp57119_c8_seq1|	http://www.genome.jp/kegg-bin/show_pathway?ko05031
	KEGG PATHWAY	ko05032	1	77	0.9999	0.9999	ZHLZ.comp37256_c0_seq1|ZHLZ.comp61057_c0_seq1|	http://www.genome.jp/kegg-bin/show_pathway?ko05032
	KEGG PATHWAY	ko05033	1	35	0.4549	0.9999	ZHLZ.comp37256_c0_seq1|ZHLZ.comp61057_c0_seq1|	http://www.genome.jp/kegg-bin/show_pathway?ko05033
	KEGG PATHWAY	ko05034	4	95	0.08242	0.511004	ZHLZ.comp35557_c0_seq1|ZHLZ.comp55656_c0_seq1|ZHLZ.comp57119_c7_seq1|ZHLZ.comp57119_c8_seq1|ZHLZ.comp59440_c0_seq1|	http://www.genome.jp/kegg-bin/show_pathway?ko05034
	KEGG PATHWAY	ko05100	1	74	0.9999	0.9999	ZHLZ.comp45601_c0_seq1|	http://www.genome.jp/kegg-bin/show_pathway?ko05100
	KEGG PATHWAY	ko05110	2	58	0.2634	0.854519	ZHLZ.comp45601_c0_seq1|ZHLZ.comp46207_c0_seq1|	http://www.genome.jp/kegg-bin/show_pathway?ko05110
	KEGG PATHWAY	ko05111	1	116	0.7261	0.9999	ZHLZ.comp60725_c0_seq1|	http://www.genome.jp/kegg-bin/show_pathway?ko05111
	KEGG PATHWAY	ko05130	2	45	0.1813	0.733083	ZHLZ.comp45601_c0_seq1|ZHLZ.comp52640_c0_seq1|ZHLZ.comp52640_c0_seq5|ZHLZ.comp55802_c0_seq14|	http://www.genome.jp/kegg-bin/show_pathway?ko05130
	KEGG PATHWAY	ko05131	2	66	0.3142	0.952846	ZHLZ.comp45601_c0_seq1|ZHLZ.comp62979_c0_seq1|	http://www.genome.jp/kegg-bin/show_pathway?ko05131
	KEGG PATHWAY	ko05132	2	87	0.6628	0.9999	ZHLZ.comp45601_c0_seq1|ZHLZ.comp62979_c0_seq1|	http://www.genome.jp/kegg-bin/show_pathway?ko05132
	KEGG PATHWAY	ko05133	3	90	0.2026	0.754387	ZHLZ.comp24911_c0_seq1|ZHLZ.comp34083_c0_seq1|ZHLZ.comp54220_c0_seq2|ZHLZ.comp57119_c7_seq1|ZHLZ.comp57119_c8_seq1|	http://www.genome.jp/kegg-bin/show_pathway?ko05133
	KEGG PATHWAY	ko05134	2	71	0.3456	0.964224	ZHLZ.comp43419_c0_seq1|ZHLZ.comp46207_c0_seq1|ZHLZ.comp48028_c0_seq1|	http://www.genome.jp/kegg-bin/show_pathway?ko05134
	KEGG PATHWAY	ko05140	1	65	0.9999	0.9999	ZHLZ.comp54220_c0_seq2|	http://www.genome.jp/kegg-bin/show_pathway?ko05140
	KEGG PATHWAY	ko05142	2	90	0.6688	0.9999	ZHLZ.comp26953_c0_seq1|ZHLZ.comp54220_c0_seq2|ZHLZ.comp59849_c0_seq1|	http://www.genome.jp/kegg-bin/show_pathway?ko05142
	KEGG PATHWAY	ko05145	2	98	0.6861	0.9999	ZHLZ.comp53768_c0_seq2|ZHLZ.comp54220_c0_seq2|	http://www.genome.jp/kegg-bin/show_pathway?ko05145
	KEGG PATHWAY	ko05152	4	141	0.3114	0.952846	ZHLZ.comp32988_c0_seq1|ZHLZ.comp32988_c1_seq1|ZHLZ.comp54220_c0_seq2|ZHLZ.comp54434_c1_seq1|ZHLZ.comp57119_c7_seq1|ZHLZ.comp57119_c8_seq1|	http://www.genome.jp/kegg-bin/show_pathway?ko05152
	KEGG PATHWAY	ko05161	1	113	0.9999	0.9999	ZHLZ.comp55656_c0_seq1|	http://www.genome.jp/kegg-bin/show_pathway?ko05161
	KEGG PATHWAY	ko05162	2	114	0.7231	0.9999	ZHLZ.comp49658_c0_seq1|ZHLZ.comp50448_c0_seq1|ZHLZ.comp54220_c0_seq2|	http://www.genome.jp/kegg-bin/show_pathway?ko05162
	KEGG PATHWAY	ko05164	2	128	0.9999	0.9999	ZHLZ.comp45601_c0_seq1|ZHLZ.comp55656_c0_seq1|	http://www.genome.jp/kegg-bin/show_pathway?ko05164
	KEGG PATHWAY	ko05165	1	232	0.1941	0.752138	ZHLZ.comp55656_c0_seq1|	http://www.genome.jp/kegg-bin/show_pathway?ko05165
	KEGG PATHWAY	ko05166	2	218	0.5936	0.9999	ZHLZ.comp26953_c0_seq1|ZHLZ.comp34892_c0_seq1|ZHLZ.comp59849_c0_seq1|	http://www.genome.jp/kegg-bin/show_pathway?ko05166
	KEGG PATHWAY	ko05167	1	161	0.5317	0.9999	ZHLZ.comp55656_c0_seq1|	http://www.genome.jp/kegg-bin/show_pathway?ko05167
	KEGG PATHWAY	ko05168	1	148	0.5248	0.9999	ZHLZ.comp52690_c0_seq1|	http://www.genome.jp/kegg-bin/show_pathway?ko05168
	KEGG PATHWAY	ko05169	1	168	0.3764	0.972367	ZHLZ.comp54220_c0_seq2|	http://www.genome.jp/kegg-bin/show_pathway?ko05169
	KEGG PATHWAY	ko05200	1	344	0.03336	0.346919	ZHLZ.comp55656_c0_seq1|	http://www.genome.jp/kegg-bin/show_pathway?ko05200
	KEGG PATHWAY	ko05202	1	158	0.5295	0.9999	ZHLZ.comp59440_c0_seq1|	http://www.genome.jp/kegg-bin/show_pathway?ko05202
	KEGG PATHWAY	ko05204	1	136	0.7329	0.9999	ZHLZ.comp27514_c0_seq1|ZHLZ.comp35384_c0_seq1|ZHLZ.comp35980_c0_seq1|ZHLZ.comp45740_c0_seq1|ZHLZ.comp47918_c0_seq1|ZHLZ.comp47918_c1_seq1|ZHLZ.comp49125_c2_seq1|ZHLZ.comp54113_c0_seq1|ZHLZ.comp59593_c0_seq1|ZHLZ.comp86401_c0_seq1|	http://www.genome.jp/kegg-bin/show_pathway?ko05204
	KEGG PATHWAY	ko05205	3	170	0.7686	0.9999	ZHLZ.comp45601_c0_seq1|ZHLZ.comp48524_c0_seq1|ZHLZ.comp55656_c0_seq1|	http://www.genome.jp/kegg-bin/show_pathway?ko05205
	KEGG PATHWAY	ko05206	2	233	0.4459	0.9999	ZHLZ.comp55656_c0_seq1|ZHLZ.comp55992_c0_seq1|ZHLZ.comp56603_c3_seq1|	http://www.genome.jp/kegg-bin/show_pathway?ko05206
	KEGG PATHWAY	ko05210	1	60	0.9999	0.9999	ZHLZ.comp55656_c0_seq1|	http://www.genome.jp/kegg-bin/show_pathway?ko05210
	KEGG PATHWAY	ko05211	1	57	0.6275	0.9999	ZHLZ.comp55656_c0_seq1|	http://www.genome.jp/kegg-bin/show_pathway?ko05211
	KEGG PATHWAY	ko05212	1	64	0.9999	0.9999	ZHLZ.comp55656_c0_seq1|	http://www.genome.jp/kegg-bin/show_pathway?ko05212
	KEGG PATHWAY	ko05213	1	47	0.5571	0.9999	ZHLZ.comp55656_c0_seq1|	http://www.genome.jp/kegg-bin/show_pathway?ko05213
	KEGG PATHWAY	ko05214	2	57	0.257	0.843565	ZHLZ.comp55656_c0_seq1|ZHLZ.comp57119_c7_seq1|ZHLZ.comp57119_c8_seq1|	http://www.genome.jp/kegg-bin/show_pathway?ko05214
	KEGG PATHWAY	ko05215	1	82	0.9999	0.9999	ZHLZ.comp55656_c0_seq1|	http://www.genome.jp/kegg-bin/show_pathway?ko05215
	KEGG PATHWAY	ko05216	1	35	0.4549	0.9999	ZHLZ.comp55656_c0_seq1|	http://www.genome.jp/kegg-bin/show_pathway?ko05216
	KEGG PATHWAY	ko05218	1	49	0.5722	0.9999	ZHLZ.comp55656_c0_seq1|	http://www.genome.jp/kegg-bin/show_pathway?ko05218
	KEGG PATHWAY	ko05219	1	39	0.4914	0.9999	ZHLZ.comp55656_c0_seq1|	http://www.genome.jp/kegg-bin/show_pathway?ko05219
	KEGG PATHWAY	ko05220	1	64	0.9999	0.9999	ZHLZ.comp55656_c0_seq1|	http://www.genome.jp/kegg-bin/show_pathway?ko05220
	KEGG PATHWAY	ko05221	1	58	0.9999	0.9999	ZHLZ.comp55656_c0_seq1|	http://www.genome.jp/kegg-bin/show_pathway?ko05221
	KEGG PATHWAY	ko05223	1	63	0.9999	0.9999	ZHLZ.comp55656_c0_seq1|	http://www.genome.jp/kegg-bin/show_pathway?ko05223
	KEGG PATHWAY	ko05224	1	106	0.9999	0.9999	ZHLZ.comp55656_c0_seq1|	http://www.genome.jp/kegg-bin/show_pathway?ko05224
	KEGG PATHWAY	ko05230	3	84	0.1766	0.724579	ZHLZ.comp26910_c0_seq1|ZHLZ.comp27189_c0_seq1|ZHLZ.comp55656_c0_seq1|	http://www.genome.jp/kegg-bin/show_pathway?ko05230
	KEGG PATHWAY	ko05231	2	73	0.358	0.969728	ZHLZ.comp55656_c0_seq1|ZHLZ.comp55790_c0_seq1|	http://www.genome.jp/kegg-bin/show_pathway?ko05231
	KEGG PATHWAY	ko05322	2	49	0.2063	0.754387	ZHLZ.comp35557_c0_seq1|ZHLZ.comp59440_c0_seq1|	http://www.genome.jp/kegg-bin/show_pathway?ko05322
	KEGG PATHWAY	ko05410	2	79	0.3947	0.983226	ZHLZ.comp45601_c0_seq1|ZHLZ.comp52586_c0_seq1|ZHLZ.comp52586_c1_seq1|	http://www.genome.jp/kegg-bin/show_pathway?ko05410
	KEGG PATHWAY	ko05412	1	68	0.9999	0.9999	ZHLZ.comp45601_c0_seq1|	http://www.genome.jp/kegg-bin/show_pathway?ko05412
	KEGG PATHWAY	ko05414	1	87	0.9999	0.9999	ZHLZ.comp45601_c0_seq1|	http://www.genome.jp/kegg-bin/show_pathway?ko05414
	KEGG PATHWAY	ko05416	1	38	0.4825	0.9999	ZHLZ.comp45601_c0_seq1|	http://www.genome.jp/kegg-bin/show_pathway?ko05416
	KEGG PATHWAY	ko05418	4	107	0.1142	0.568961	ZHLZ.comp27514_c0_seq1|ZHLZ.comp35384_c0_seq1|ZHLZ.comp35980_c0_seq1|ZHLZ.comp45601_c0_seq1|ZHLZ.comp45740_c0_seq1|ZHLZ.comp47918_c0_seq1|ZHLZ.comp47918_c1_seq1|ZHLZ.comp49125_c2_seq1|ZHLZ.comp52586_c0_seq1|ZHLZ.comp52586_c1_seq1|ZHLZ.comp54113_c0_seq1|ZHLZ.comp57119_c7_seq1|ZHLZ.comp57119_c8_seq1|ZHLZ.comp59593_c0_seq1|ZHLZ.comp86401_c0_seq1|	http://www.genome.jp/kegg-bin/show_pathway?ko05418

## Sheet: 1-2 KEGG
Term	Database	Id	Sample number	Background number	P-Value	Corrected P-Value	Genes	Hyperlink
Pentose and glucuronate interconversions	KEGG PATHWAY	ko00040	2	126	0.02195	0.11952	ZHLZ.comp47058_c0_seq1|ZHLZ.comp49885_c0_seq1|ZHLZ.comp54417_c0_seq1|ZHLZ.comp56605_c1_seq1|	http://www.genome.jp/kegg-bin/show_pathway?ko00040
Fructose and mannose metabolism	KEGG PATHWAY	ko00051	1	163	0.2505	0.273273	ZHLZ.comp35654_c0_seq1|	http://www.genome.jp/kegg-bin/show_pathway?ko00051
Galactose metabolism	KEGG PATHWAY	ko00052	1	124	0.1972	0.2648	ZHLZ.comp53276_c0_seq1|	http://www.genome.jp/kegg-bin/show_pathway?ko00052
Fatty acid elongation	KEGG PATHWAY	ko00062	1	64	0.1073	0.221	ZHLZ.comp55945_c1_seq2|	http://www.genome.jp/kegg-bin/show_pathway?ko00062
Steroid hormone biosynthesis	KEGG PATHWAY	ko00140	1	147	0.2291	0.273273	ZHLZ.comp55945_c1_seq2|	http://www.genome.jp/kegg-bin/show_pathway?ko00140
Photosynthesis - antenna proteins	KEGG PATHWAY	ko00196	1	43	0.07349	0.22047	ZHLZ.comp57801_c0_seq1|	http://www.genome.jp/kegg-bin/show_pathway?ko00196
Alanine, aspartate and glutamate metabolism	KEGG PATHWAY	ko00250	1	96	0.1565	0.244957	ZHLZ.comp35703_c0_seq1|	http://www.genome.jp/kegg-bin/show_pathway?ko00250
Tyrosine metabolism	KEGG PATHWAY	ko00350	2	149	0.02988	0.11952	ZHLZ.comp26963_c0_seq1|ZHLZ.comp52111_c0_seq1|	http://www.genome.jp/kegg-bin/show_pathway?ko00350
Tryptophan metabolism	KEGG PATHWAY	ko00380	1	150	0.2332	0.273273	ZHLZ.comp36142_c1_seq1|	http://www.genome.jp/kegg-bin/show_pathway?ko00380
Cyanoamino acid metabolism	KEGG PATHWAY	ko00460	1	80	0.1323	0.2214	ZHLZ.comp26845_c0_seq1|ZHLZ.comp36142_c0_seq1|ZHLZ.comp58678_c0_seq2|	http://www.genome.jp/kegg-bin/show_pathway?ko00460
Glutathione metabolism	KEGG PATHWAY	ko00480	1	82	0.1353	0.2214	ZHLZ.comp27514_c0_seq1|ZHLZ.comp54113_c0_seq1|	http://www.genome.jp/kegg-bin/show_pathway?ko00480
Starch and sucrose metabolism	KEGG PATHWAY	ko00500	3	147	0.002585	0.023265	ZHLZ.comp26845_c0_seq1|ZHLZ.comp36142_c0_seq1|ZHLZ.comp53276_c0_seq1|ZHLZ.comp55250_c0_seq1|ZHLZ.comp58678_c0_seq2|	http://www.genome.jp/kegg-bin/show_pathway?ko00500
Amino sugar and nucleotide sugar metabolism	KEGG PATHWAY	ko00520	1	260	0.368	0.378514	ZHLZ.comp48606_c0_seq1|ZHLZ.comp48606_c0_seq2|	http://www.genome.jp/kegg-bin/show_pathway?ko00520
Linoleic acid metabolism	KEGG PATHWAY	ko00591	2	54	0.00436	0.031392	ZHLZ.comp47430_c0_seq1|ZHLZ.comp47430_c1_seq1|ZHLZ.comp56023_c0_seq1|	http://www.genome.jp/kegg-bin/show_pathway?ko00591
alpha-Linolenic acid metabolism	KEGG PATHWAY	ko00592	1	66	0.1105	0.221	ZHLZ.comp56023_c0_seq1|	http://www.genome.jp/kegg-bin/show_pathway?ko00592
Phenylpropanoid biosynthesis	KEGG PATHWAY	ko00940	3	101	0.000887	0.010644	ZHLZ.comp26845_c0_seq1|ZHLZ.comp36142_c0_seq1|ZHLZ.comp55755_c1_seq1|ZHLZ.comp55755_c1_seq3|ZHLZ.comp58678_c0_seq2|ZHLZ.comp59523_c0_seq1|	http://www.genome.jp/kegg-bin/show_pathway?ko00940
Flavonoid biosynthesis	KEGG PATHWAY	ko00941	3	91	0.000656	0.010644	ZHLZ.comp27950_c0_seq1|ZHLZ.comp54855_c0_seq1|ZHLZ.comp56809_c5_seq1|	http://www.genome.jp/kegg-bin/show_pathway?ko00941
Isoquinoline alkaloid biosynthesis	KEGG PATHWAY	ko00950	2	139	0.02631	0.11952	ZHLZ.comp26963_c0_seq1|ZHLZ.comp52111_c0_seq1|	http://www.genome.jp/kegg-bin/show_pathway?ko00950
Betalain biosynthesis	KEGG PATHWAY	ko00965	1	32	0.05524	0.180785	ZHLZ.comp52111_c0_seq1|	http://www.genome.jp/kegg-bin/show_pathway?ko00965
Metabolism of xenobiotics by cytochrome P450	KEGG PATHWAY	ko00980	1	155	0.2399	0.273273	ZHLZ.comp27514_c0_seq1|ZHLZ.comp54113_c0_seq1|	http://www.genome.jp/kegg-bin/show_pathway?ko00980
Drug metabolism - cytochrome P450	KEGG PATHWAY	ko00982	1	125	0.1986	0.2648	ZHLZ.comp27514_c0_seq1|ZHLZ.comp54113_c0_seq1|	http://www.genome.jp/kegg-bin/show_pathway?ko00982
Biosynthesis of unsaturated fatty acids	KEGG PATHWAY	ko01040	1	82	0.1353	0.2214	ZHLZ.comp55945_c1_seq2|	http://www.genome.jp/kegg-bin/show_pathway?ko01040
Metabolic pathways	KEGG PATHWAY	ko01100	16	4666	0.0292	0.11952	ZHLZ.comp26845_c0_seq1|ZHLZ.comp26963_c0_seq1|ZHLZ.comp27950_c0_seq1|ZHLZ.comp35703_c0_seq1|ZHLZ.comp36142_c0_seq1|ZHLZ.comp48606_c0_seq1|ZHLZ.comp48606_c0_seq2|ZHLZ.comp49885_c0_seq1|ZHLZ.comp52111_c0_seq1|ZHLZ.comp53276_c0_seq1|ZHLZ.comp54417_c0_seq1|ZHLZ.comp54855_c0_seq1|ZHLZ.comp55250_c0_seq1|ZHLZ.comp55755_c1_seq1|ZHLZ.comp55755_c1_seq3|ZHLZ.comp55945_c1_seq2|ZHLZ.comp56023_c0_seq1|ZHLZ.com…	http://www.genome.jp/kegg-bin/show_pathway?ko01100
Biosynthesis of secondary metabolites	KEGG PATHWAY	ko01110	13	2131	0.0004426	0.010644	ZHLZ.comp26845_c0_seq1|ZHLZ.comp26963_c0_seq1|ZHLZ.comp27950_c0_seq1|ZHLZ.comp35703_c0_seq1|ZHLZ.comp36142_c0_seq1|ZHLZ.comp49295_c0_seq1|ZHLZ.comp52111_c0_seq1|ZHLZ.comp54855_c0_seq1|ZHLZ.comp55755_c1_seq1|ZHLZ.comp55755_c1_seq3|ZHLZ.comp55945_c1_seq2|ZHLZ.comp56023_c0_seq1|ZHLZ.comp56809_c5_seq1|ZHLZ.comp58678_c0_seq2|ZHLZ.comp59273_c1_seq1|ZHLZ.comp59273_c1_seq7|ZHLZ.comp59523_c0_seq1|	http://www.genome.jp/kegg-bin/show_pathway?ko01110
Microbial metabolism in diverse environments	KEGG PATHWAY	ko01120	1	2069	0.2491	0.273273	ZHLZ.comp59273_c1_seq1|ZHLZ.comp59273_c1_seq7|	http://www.genome.jp/kegg-bin/show_pathway?ko01120
Fatty acid metabolism	KEGG PATHWAY	ko01212	1	177	0.2688	0.284612	ZHLZ.comp55945_c1_seq2|	http://www.genome.jp/kegg-bin/show_pathway?ko01212
Platinum drug resistance	KEGG PATHWAY	ko01524	1	49	0.0833	0.221	ZHLZ.comp27514_c0_seq1|ZHLZ.comp54113_c0_seq1|	http://www.genome.jp/kegg-bin/show_pathway?ko01524
Quorum sensing	KEGG PATHWAY	ko02024	1	338	0.4485	0.4485	ZHLZ.comp47058_c0_seq1|	http://www.genome.jp/kegg-bin/show_pathway?ko02024
MAPK signaling pathway - plant	KEGG PATHWAY	ko04016	1	55	0.09299	0.221	ZHLZ.comp48606_c0_seq1|ZHLZ.comp48606_c0_seq2|	http://www.genome.jp/kegg-bin/show_pathway?ko04016
Ferroptosis	KEGG PATHWAY	ko04216	1	65	0.1089	0.221	ZHLZ.comp46581_c0_seq1|	http://www.genome.jp/kegg-bin/show_pathway?ko04216
Necroptosis	KEGG PATHWAY	ko04217	1	107	0.1727	0.248688	ZHLZ.comp46581_c0_seq1|	http://www.genome.jp/kegg-bin/show_pathway?ko04217
Circadian rhythm - plant	KEGG PATHWAY	ko04712	1	28	0.04851	0.174636	ZHLZ.comp27950_c0_seq1|	http://www.genome.jp/kegg-bin/show_pathway?ko04712
Melanogenesis	KEGG PATHWAY	ko04916	1	74	0.123	0.2214	ZHLZ.comp52111_c0_seq1|	http://www.genome.jp/kegg-bin/show_pathway?ko04916
Mineral absorption	KEGG PATHWAY	ko04978	1	61	0.1026	0.221	ZHLZ.comp46581_c0_seq1|	http://www.genome.jp/kegg-bin/show_pathway?ko04978
Chemical carcinogenesis	KEGG PATHWAY	ko05204	1	136	0.214	0.273273	ZHLZ.comp27514_c0_seq1|ZHLZ.comp54113_c0_seq1|	http://www.genome.jp/kegg-bin/show_pathway?ko05204
Fluid shear stress and atherosclerosis	KEGG PATHWAY	ko05418	1	107	0.1727	0.248688	ZHLZ.comp27514_c0_seq1|ZHLZ.comp54113_c0_seq1|	http://www.genome.jp/kegg-bin/show_pathway?ko05418

## Sheet: 1-3KEGG
Term	Database	Id	Sample number	Background number	P-Value	Corrected P-Value	Genes	Hyperlink
Glycolysis / Gluconeogenesis	KEGG PATHWAY	ko00010	14	131	6.123e-07	1.69572e-05	ZHLZ.comp26757_c0_seq1|ZHLZ.comp26910_c0_seq1|ZHLZ.comp27189_c0_seq1|ZHLZ.comp35381_c0_seq1|ZHLZ.comp35702_c0_seq1|ZHLZ.comp36082_c1_seq1|ZHLZ.comp36082_c2_seq1|ZHLZ.comp45488_c0_seq1|ZHLZ.comp45546_c0_seq1|ZHLZ.comp46348_c1_seq1|ZHLZ.comp46813_c0_seq1|ZHLZ.comp48853_c0_seq1|ZHLZ.comp49635_c0_seq1|ZHLZ.comp49797_c0_seq1|ZHLZ.comp52668_c0_seq1|ZHLZ.comp54484_c2_seq1|ZHLZ.comp57293_c1_seq1|ZHLZ.com…	http://www.genome.jp/kegg-bin/show_pathway?ko00010
Citrate cycle	KEGG PATHWAY	ko00020	9	78	3.172e-05	0.00068991	ZHLZ.comp27189_c0_seq1|ZHLZ.comp27213_c0_seq1|ZHLZ.comp46161_c0_seq1|ZHLZ.comp46348_c1_seq1|ZHLZ.comp48853_c0_seq1|ZHLZ.comp54426_c0_seq1|ZHLZ.comp54484_c2_seq1|ZHLZ.comp56613_c0_seq1|ZHLZ.comp57293_c1_seq1|ZHLZ.comp57459_c1_seq1|ZHLZ.comp59542_c0_seq1|ZHLZ.comp60222_c0_seq1|	http://www.genome.jp/kegg-bin/show_pathway?ko00020
Pentose phosphate pathway	KEGG PATHWAY	ko00030	7	115	0.009422	0.0878265	ZHLZ.comp26757_c0_seq1|ZHLZ.comp26910_c0_seq1|ZHLZ.comp35381_c0_seq1|ZHLZ.comp35974_c0_seq1|ZHLZ.comp46945_c0_seq1|ZHLZ.comp53861_c0_seq1|ZHLZ.comp53861_c1_seq1|ZHLZ.comp56799_c0_seq1|ZHLZ.comp56799_c1_seq3|ZHLZ.comp58735_c1_seq3|ZHLZ.comp59942_c0_seq1|ZHLZ.comp60133_c0_seq1|	http://www.genome.jp/kegg-bin/show_pathway?ko00030
Pentose and glucuronate interconversions	KEGG PATHWAY	ko00040	4	126	0.3279	0.922761	ZHLZ.comp45315_c0_seq1|ZHLZ.comp47058_c0_seq1|ZHLZ.comp49885_c0_seq1|ZHLZ.comp51600_c0_seq1|ZHLZ.comp52113_c0_seq3|ZHLZ.comp54417_c0_seq1|ZHLZ.comp56129_c0_seq1|ZHLZ.comp57143_c0_seq1|ZHLZ.comp58993_c2_seq1|	http://www.genome.jp/kegg-bin/show_pathway?ko00040
Fructose and mannose metabolism	KEGG PATHWAY	ko00051	5	163	0.3905	0.951094	ZHLZ.comp26757_c0_seq1|ZHLZ.comp26910_c0_seq1|ZHLZ.comp35381_c0_seq1|ZHLZ.comp35654_c0_seq1|ZHLZ.comp45546_c0_seq1|ZHLZ.comp51600_c0_seq1|ZHLZ.comp52493_c0_seq1|	http://www.genome.jp/kegg-bin/show_pathway?ko00051
Galactose metabolism	KEGG PATHWAY	ko00052	4	124	0.3223	0.922761	ZHLZ.comp26757_c0_seq1|ZHLZ.comp26910_c0_seq1|ZHLZ.comp27138_c0_seq1|ZHLZ.comp53276_c0_seq1|ZHLZ.comp55628_c0_seq1|ZHLZ.comp60133_c0_seq1|	http://www.genome.jp/kegg-bin/show_pathway?ko00052
Ascorbate and aldarate metabolism	KEGG PATHWAY	ko00053	3	94	0.4424	0.998492	ZHLZ.comp35702_c0_seq1|ZHLZ.comp49114_c0_seq1|ZHLZ.comp49213_c0_seq1|ZHLZ.comp49635_c0_seq1|ZHLZ.comp49797_c0_seq1|ZHLZ.comp52113_c0_seq3|	http://www.genome.jp/kegg-bin/show_pathway?ko00053
Fatty acid biosynthesis	KEGG PATHWAY	ko00061	8	84	0.0003298	0.00445005	ZHLZ.comp27781_c0_seq1|ZHLZ.comp43654_c0_seq1|ZHLZ.comp45166_c0_seq1|ZHLZ.comp45776_c0_seq1|ZHLZ.comp48345_c1_seq1|ZHLZ.comp53444_c0_seq1|ZHLZ.comp53640_c0_seq1|ZHLZ.comp53640_c1_seq1|ZHLZ.comp59648_c0_seq1|ZHLZ.comp59692_c0_seq1|ZHLZ.comp59918_c0_seq1|	http://www.genome.jp/kegg-bin/show_pathway?ko00061
Fatty acid elongation	KEGG PATHWAY	ko00062	5	64	0.009812	0.088308	ZHLZ.comp26923_c0_seq1|ZHLZ.comp45514_c0_seq1|ZHLZ.comp47338_c0_seq1|ZHLZ.comp48801_c0_seq1|ZHLZ.comp55945_c1_seq1|ZHLZ.comp55945_c1_seq2|ZHLZ.comp56214_c0_seq2|ZHLZ.comp56214_c1_seq2|ZHLZ.comp58384_c0_seq1|ZHLZ.comp58561_c2_seq2|	http://www.genome.jp/kegg-bin/show_pathway?ko00062
Fatty acid degradation	KEGG PATHWAY	ko00071	5	105	0.06341	0.367778	ZHLZ.comp35702_c0_seq1|ZHLZ.comp43654_c0_seq1|ZHLZ.comp45166_c0_seq1|ZHLZ.comp45488_c0_seq1|ZHLZ.comp49635_c0_seq1|ZHLZ.comp49797_c0_seq1|ZHLZ.comp58329_c1_seq1|ZHLZ.comp58913_c0_seq1|	http://www.genome.jp/kegg-bin/show_pathway?ko00071
Synthesis and degradation of ketone bodies	KEGG PATHWAY	ko00072	1	15	0.2642	0.811249	ZHLZ.comp53936_c0_seq1|	http://www.genome.jp/kegg-bin/show_pathway?ko00072
Cutin, suberine and wax biosynthesis	KEGG PATHWAY	ko00073	2	42	0.209	0.72732	ZHLZ.comp35736_c0_seq1|ZHLZ.comp46620_c2_seq1|ZHLZ.comp48839_c1_seq1|ZHLZ.comp57069_c0_seq10|ZHLZ.comp57069_c0_seq4|	http://www.genome.jp/kegg-bin/show_pathway?ko00073
Steroid biosynthesis	KEGG PATHWAY	ko00100	1	82	0.9999	0.9999	ZHLZ.comp43205_c0_seq1|	http://www.genome.jp/kegg-bin/show_pathway?ko00100
Ubiquinone and other terpenoid-quinone biosynthesis	KEGG PATHWAY	ko00130	3	147	0.7726	0.9999	ZHLZ.comp27061_c0_seq1|ZHLZ.comp27061_c1_seq1|ZHLZ.comp27255_c0_seq1|ZHLZ.comp27255_c1_seq1|ZHLZ.comp50520_c0_seq2|	http://www.genome.jp/kegg-bin/show_pathway?ko00130
Steroid hormone biosynthesis	KEGG PATHWAY	ko00140	2	147	0.9999	0.9999	ZHLZ.comp52706_c0_seq1|ZHLZ.comp55945_c1_seq1|ZHLZ.comp55945_c1_seq2|	http://www.genome.jp/kegg-bin/show_pathway?ko00140
Oxidative phosphorylation	KEGG PATHWAY	ko00190	7	232	0.2432	0.794092	ZHLZ.comp27213_c0_seq1|ZHLZ.comp35350_c0_seq1|ZHLZ.comp45188_c0_seq1|ZHLZ.comp47468_c2_seq1|ZHLZ.comp49234_c0_seq1|ZHLZ.comp52600_c0_seq1|ZHLZ.comp54988_c0_seq1|ZHLZ.comp60035_c0_seq1|	http://www.genome.jp/kegg-bin/show_pathway?ko00190
Photosynthesis	KEGG PATHWAY	ko00195	23	75	2.2e-16	5.742e-14	ZHLZ.comp26928_c0_seq1|ZHLZ.comp26931_c0_seq2|ZHLZ.comp26966_c0_seq1|ZHLZ.comp26992_c1_seq1|ZHLZ.comp27098_c0_seq1|ZHLZ.comp35504_c0_seq1|ZHLZ.comp35609_c0_seq1|ZHLZ.comp46106_c0_seq1|ZHLZ.comp46145_c0_seq1|ZHLZ.comp48739_c0_seq1|ZHLZ.comp50068_c0_seq1|ZHLZ.comp50769_c0_seq2|ZHLZ.comp51536_c0_seq1|ZHLZ.comp52537_c1_seq1|ZHLZ.comp59452_c0_seq1|ZHLZ.comp59454_c0_seq1|ZHLZ.comp59475_c0_seq1|ZHLZ.com…	http://www.genome.jp/kegg-bin/show_pathway?ko00195
Photosynthesis - antenna proteins	KEGG PATHWAY	ko00196	10	43	1.34e-08	8.7435e-07	ZHLZ.comp26926_c0_seq1|ZHLZ.comp26935_c0_seq1|ZHLZ.comp26985_c0_seq2|ZHLZ.comp35584_c0_seq1|ZHLZ.comp35600_c0_seq1|ZHLZ.comp52210_c1_seq1|ZHLZ.comp57801_c0_seq1|ZHLZ.comp57801_c1_seq1|ZHLZ.comp59522_c0_seq1|ZHLZ.comp59558_c0_seq1|ZHLZ.comp61770_c0_seq1|	http://www.genome.jp/kegg-bin/show_pathway?ko00196
Arginine biosynthesis	KEGG PATHWAY	ko00220	1	79	0.9999	0.9999	ZHLZ.comp59736_c0_seq1|	http://www.genome.jp/kegg-bin/show_pathway?ko00220
Purine metabolism	KEGG PATHWAY	ko00230	8	368	0.8503	0.9999	ZHLZ.comp26906_c0_seq2|ZHLZ.comp35454_c0_seq1|ZHLZ.comp36082_c1_seq1|ZHLZ.comp36082_c2_seq1|ZHLZ.comp47107_c0_seq1|ZHLZ.comp52668_c0_seq1|ZHLZ.comp55009_c0_seq1|ZHLZ.comp56140_c0_seq1|ZHLZ.comp59930_c0_seq1|ZHLZ.comp60133_c0_seq1|	http://www.genome.jp/kegg-bin/show_pathway?ko00230
Pyrimidine metabolism	KEGG PATHWAY	ko00240	3	242	0.6397	0.9999	ZHLZ.comp26906_c0_seq2|ZHLZ.comp35454_c0_seq1|ZHLZ.comp55009_c0_seq1|	http://www.genome.jp/kegg-bin/show_pathway?ko00240
Alanine, aspartate and glutamate metabolism	KEGG PATHWAY	ko00250	3	96	0.4476	0.998492	ZHLZ.comp45736_c0_seq1|ZHLZ.comp55093_c0_seq1|ZHLZ.comp59736_c0_seq1|	http://www.genome.jp/kegg-bin/show_pathway?ko00250
Glycine, serine and threonine metabolism	KEGG PATHWAY	ko00260	6	145	0.07644	0.391193	ZHLZ.comp27536_c0_seq1|ZHLZ.comp35523_c0_seq1|ZHLZ.comp43882_c0_seq1|ZHLZ.comp45736_c0_seq1|ZHLZ.comp48853_c0_seq1|ZHLZ.comp52412_c0_seq1|	http://www.genome.jp/kegg-bin/show_pathway?ko00260
Monobactam biosynthesis	KEGG PATHWAY	ko00261	1	68	0.9999	0.9999	ZHLZ.comp52412_c0_seq1|	http://www.genome.jp/kegg-bin/show_pathway?ko00261
Cysteine and methionine metabolism	KEGG PATHWAY	ko00270	11	162	0.0005519	0.00685933	ZHLZ.comp35521_c0_seq1|ZHLZ.comp45736_c0_seq1|ZHLZ.comp46161_c0_seq1|ZHLZ.comp49915_c0_seq1|ZHLZ.comp49915_c1_seq1|ZHLZ.comp52412_c0_seq1|ZHLZ.comp54886_c0_seq1|ZHLZ.comp56132_c0_seq1|ZHLZ.comp57459_c1_seq1|ZHLZ.comp57462_c0_seq1|ZHLZ.comp57462_c2_seq2|ZHLZ.comp59736_c0_seq1|ZHLZ.comp59797_c0_seq1|	http://www.genome.jp/kegg-bin/show_pathway?ko00270
Valine, leucine and isoleucine degradation	KEGG PATHWAY	ko00280	5	111	0.0764	0.391193	ZHLZ.comp35464_c0_seq1|ZHLZ.comp35702_c0_seq1|ZHLZ.comp45736_c0_seq1|ZHLZ.comp48853_c0_seq1|ZHLZ.comp49635_c0_seq1|ZHLZ.comp49797_c0_seq1|ZHLZ.comp53936_c0_seq1|	http://www.genome.jp/kegg-bin/show_pathway?ko00280
Lysine biosynthesis	KEGG PATHWAY	ko00300	1	81	0.9999	0.9999	ZHLZ.comp52412_c0_seq1|	http://www.genome.jp/kegg-bin/show_pathway?ko00300
Lysine degradation	KEGG PATHWAY	ko00310	1	129	0.5258	0.9999	ZHLZ.comp35702_c0_seq1|ZHLZ.comp49635_c0_seq1|ZHLZ.comp49797_c0_seq1|	http://www.genome.jp/kegg-bin/show_pathway?ko00310
Arginine and proline metabolism	KEGG PATHWAY	ko00330	2	177	0.5903	0.9999	ZHLZ.comp35702_c0_seq1|ZHLZ.comp49635_c0_seq1|ZHLZ.comp49797_c0_seq1|ZHLZ.comp59736_c0_seq1|	http://www.genome.jp/kegg-bin/show_pathway?ko00330
Prodigiosin biosynthesis	KEGG PATHWAY	ko00333	1	39	0.5494	0.9999	ZHLZ.comp59692_c0_seq1|	http://www.genome.jp/kegg-bin/show_pathway?ko00333
Histidine metabolism	KEGG PATHWAY	ko00340	1	94	0.9999	0.9999	ZHLZ.comp35702_c0_seq1|ZHLZ.comp49635_c0_seq1|ZHLZ.comp49797_c0_seq1|	http://www.genome.jp/kegg-bin/show_pathway?ko00340
Tyrosine metabolism	KEGG PATHWAY	ko00350	6	149	0.1305	0.558369	ZHLZ.comp26963_c0_seq1|ZHLZ.comp35523_c0_seq1|ZHLZ.comp45488_c0_seq1|ZHLZ.comp47117_c0_seq1|ZHLZ.comp58329_c1_seq1|ZHLZ.comp59736_c0_seq1|	http://www.genome.jp/kegg-bin/show_pathway?ko00350
Phenylalanine metabolism	KEGG PATHWAY	ko00360	5	149	0.2332	0.780323	ZHLZ.comp27061_c0_seq1|ZHLZ.comp27061_c1_seq1|ZHLZ.comp27255_c0_seq1|ZHLZ.comp27255_c1_seq1|ZHLZ.comp35523_c0_seq1|ZHLZ.comp43564_c0_seq1|ZHLZ.comp43564_c1_seq1|ZHLZ.comp43564_c2_seq1|ZHLZ.comp43564_c3_seq1|ZHLZ.comp59736_c0_seq1|	http://www.genome.jp/kegg-bin/show_pathway?ko00360
Tryptophan metabolism	KEGG PATHWAY	ko00380	2	150	0.7728	0.9999	ZHLZ.comp35702_c0_seq1|ZHLZ.comp49635_c0_seq1|ZHLZ.comp49797_c0_seq1|ZHLZ.comp59437_c0_seq1|	http://www.genome.jp/kegg-bin/show_pathway?ko00380
Phenylalanine, tyrosine and tryptophan biosynthesis	KEGG PATHWAY	ko00400	5	108	0.06973	0.371419	ZHLZ.comp27539_c0_seq1|ZHLZ.comp43882_c0_seq1|ZHLZ.comp46429_c0_seq1|ZHLZ.comp48345_c0_seq1|ZHLZ.comp59736_c0_seq1|	http://www.genome.jp/kegg-bin/show_pathway?ko00400
beta-Alanine metabolism	KEGG PATHWAY	ko00410	3	76	0.2001	0.720789	ZHLZ.comp35464_c0_seq1|ZHLZ.comp35523_c0_seq1|ZHLZ.comp35702_c0_seq1|ZHLZ.comp49635_c0_seq1|ZHLZ.comp49797_c0_seq1|	http://www.genome.jp/kegg-bin/show_pathway?ko00410
Selenocompound metabolism	KEGG PATHWAY	ko00450	2	56	0.3139	0.920538	ZHLZ.comp35521_c0_seq1|ZHLZ.comp57462_c0_seq1|ZHLZ.comp57462_c2_seq2|	http://www.genome.jp/kegg-bin/show_pathway?ko00450
Cyanoamino acid metabolism	KEGG PATHWAY	ko00460	4	80	0.08008	0.40194	ZHLZ.comp43729_c0_seq1|ZHLZ.comp47439_c0_seq1|ZHLZ.comp54462_c0_seq1|ZHLZ.comp54462_c1_seq1|ZHLZ.comp54462_c1_seq2|ZHLZ.comp54869_c0_seq1|ZHLZ.comp54886_c0_seq1|ZHLZ.comp57437_c1_seq2|ZHLZ.comp58678_c0_seq2|	http://www.genome.jp/kegg-bin/show_pathway?ko00460
Glutathione metabolism	KEGG PATHWAY	ko00480	4	82	0.08586	0.421539	ZHLZ.comp27280_c1_seq1|ZHLZ.comp35384_c0_seq1|ZHLZ.comp41023_c0_seq1|ZHLZ.comp45310_c1_seq1|ZHLZ.comp45740_c0_seq1|ZHLZ.comp45903_c0_seq1|ZHLZ.comp46945_c0_seq1|ZHLZ.comp47918_c0_seq1|ZHLZ.comp49114_c0_seq1|ZHLZ.comp49213_c0_seq1|ZHLZ.comp54113_c0_seq1|ZHLZ.comp55275_c1_seq1|	http://www.genome.jp/kegg-bin/show_pathway?ko00480
Starch and sucrose metabolism	KEGG PATHWAY	ko00500	11	147	0.000242	0.00371541	ZHLZ.comp43729_c0_seq1|ZHLZ.comp47439_c0_seq1|ZHLZ.comp50082_c0_seq1|ZHLZ.comp51503_c0_seq1|ZHLZ.comp51503_c1_seq1|ZHLZ.comp51503_c3_seq1|ZHLZ.comp52173_c0_seq1|ZHLZ.comp53234_c1_seq2|ZHLZ.comp53234_c1_seq3|ZHLZ.comp53276_c0_seq1|ZHLZ.comp54462_c0_seq1|ZHLZ.comp54462_c1_seq1|ZHLZ.comp54462_c1_seq2|ZHLZ.comp54763_c0_seq1|ZHLZ.comp54801_c0_seq1|ZHLZ.comp54869_c0_seq1|ZHLZ.comp55291_c1_seq1|ZHLZ.com…	http://www.genome.jp/kegg-bin/show_pathway?ko00500
N-Glycan biosynthesis	KEGG PATHWAY	ko00510	1	80	0.9999	0.9999	ZHLZ.comp59514_c0_seq1|	http://www.genome.jp/kegg-bin/show_pathway?ko00510
Other glycan degradation	KEGG PATHWAY	ko00511	2	20	0.06134	0.363858	ZHLZ.comp25006_c0_seq1|ZHLZ.comp51403_c0_seq2|	http://www.genome.jp/kegg-bin/show_pathway?ko00511
Various types of N-glycan biosynthesis	KEGG PATHWAY	ko00513	2	83	0.6854	0.9999	ZHLZ.comp25006_c0_seq1|ZHLZ.comp59514_c0_seq1|	http://www.genome.jp/kegg-bin/show_pathway?ko00513
Other types of O-glycan biosynthesis	KEGG PATHWAY	ko00514	1	27	0.4242	0.988537	ZHLZ.comp27320_c0_seq1|	http://www.genome.jp/kegg-bin/show_pathway?ko00514
Amino sugar and nucleotide sugar metabolism	KEGG PATHWAY	ko00520	10	260	0.04648	0.295885	ZHLZ.comp25006_c0_seq1|ZHLZ.comp26793_c0_seq1|ZHLZ.comp27138_c0_seq1|ZHLZ.comp46824_c0_seq1|ZHLZ.comp48606_c0_seq1|ZHLZ.comp48606_c0_seq2|ZHLZ.comp48859_c0_seq1|ZHLZ.comp51304_c0_seq1|ZHLZ.comp52113_c0_seq3|ZHLZ.comp54763_c0_seq1|ZHLZ.comp60133_c0_seq1|ZHLZ.comp64075_c0_seq1|	http://www.genome.jp/kegg-bin/show_pathway?ko00520
Streptomycin biosynthesis	KEGG PATHWAY	ko00521	1	43	0.5847	0.9999	ZHLZ.comp60133_c0_seq1|	http://www.genome.jp/kegg-bin/show_pathway?ko00521
Glycosaminoglycan degradation	KEGG PATHWAY	ko00531	2	43	0.2165	0.733851	ZHLZ.comp25006_c0_seq1|ZHLZ.comp48524_c0_seq1|	http://www.genome.jp/kegg-bin/show_pathway?ko00531
Peptidoglycan biosynthesis	KEGG PATHWAY	ko00550	1	73	0.9999	0.9999	ZHLZ.comp52228_c0_seq1|	http://www.genome.jp/kegg-bin/show_pathway?ko00550
Glycerolipid metabolism	KEGG PATHWAY	ko00561	7	114	0.009004	0.0870387	ZHLZ.comp26932_c0_seq1|ZHLZ.comp30332_c0_seq1|ZHLZ.comp35702_c0_seq1|ZHLZ.comp36137_c0_seq1|ZHLZ.comp37484_c0_seq1|ZHLZ.comp49048_c0_seq1|ZHLZ.comp49635_c0_seq1|ZHLZ.comp49797_c0_seq1|ZHLZ.comp51990_c0_seq1|ZHLZ.comp59675_c0_seq1|ZHLZ.comp64075_c0_seq1|	http://www.genome.jp/kegg-bin/show_pathway?ko00561
Inositol phosphate metabolism	KEGG PATHWAY	ko00562	2	113	0.9999	0.9999	ZHLZ.comp45546_c0_seq1|ZHLZ.comp46496_c0_seq1|	http://www.genome.jp/kegg-bin/show_pathway?ko00562
Glycerophospholipid metabolism	KEGG PATHWAY	ko00564	4	162	0.5729	0.9999	ZHLZ.comp26932_c0_seq1|ZHLZ.comp36137_c0_seq1|ZHLZ.comp51990_c0_seq1|ZHLZ.comp55452_c0_seq2|ZHLZ.comp59915_c0_seq1|	http://www.genome.jp/kegg-bin/show_pathway?ko00564
Linoleic acid metabolism	KEGG PATHWAY	ko00591	2	54	0.299	0.886807	ZHLZ.comp47430_c0_seq1|ZHLZ.comp47430_c1_seq1|ZHLZ.comp54069_c0_seq1|ZHLZ.comp56023_c0_seq1|ZHLZ.comp58977_c1_seq1|	http://www.genome.jp/kegg-bin/show_pathway?ko00591
alpha-Linolenic acid metabolism	KEGG PATHWAY	ko00592	6	66	0.002276	0.0247515	ZHLZ.comp49790_c0_seq1|ZHLZ.comp53363_c0_seq1|ZHLZ.comp54069_c0_seq1|ZHLZ.comp55008_c0_seq1|ZHLZ.comp55606_c0_seq1|ZHLZ.comp56023_c0_seq1|ZHLZ.comp58913_c0_seq1|	http://www.genome.jp/kegg-bin/show_pathway?ko00592
Sphingolipid metabolism	KEGG PATHWAY	ko00600	2	67	0.3943	0.951094	ZHLZ.comp49001_c0_seq2|ZHLZ.comp49001_c1_seq1|ZHLZ.comp52466_c0_seq1|	http://www.genome.jp/kegg-bin/show_pathway?ko00600
Glycosphingolipid biosynthesis - globo and isoglobo series	KEGG PATHWAY	ko00603	1	38	0.5401	0.9999	ZHLZ.comp25006_c0_seq1|	http://www.genome.jp/kegg-bin/show_pathway?ko00603
Glycosphingolipid biosynthesis - ganglio series	KEGG PATHWAY	ko00604	1	46	0.6094	0.9999	ZHLZ.comp25006_c0_seq1|	http://www.genome.jp/kegg-bin/show_pathway?ko00604
Pyruvate metabolism	KEGG PATHWAY	ko00620	11	128	7.116e-05	0.00123818	ZHLZ.comp27189_c0_seq1|ZHLZ.comp35702_c0_seq1|ZHLZ.comp36000_c0_seq1|ZHLZ.comp36082_c1_seq1|ZHLZ.comp36082_c2_seq1|ZHLZ.comp45776_c0_seq1|ZHLZ.comp46161_c0_seq1|ZHLZ.comp46348_c1_seq1|ZHLZ.comp48853_c0_seq1|ZHLZ.comp49635_c0_seq1|ZHLZ.comp49797_c0_seq1|ZHLZ.comp52668_c0_seq1|ZHLZ.comp54484_c2_seq1|ZHLZ.comp57293_c1_seq1|ZHLZ.comp57459_c1_seq1|ZHLZ.comp59918_c0_seq1|ZHLZ.comp60222_c0_seq1|	http://www.genome.jp/kegg-bin/show_pathway?ko00620
Chloroalkane and chloroalkene degradation	KEGG PATHWAY	ko00625	3	73	0.1847	0.708922	ZHLZ.comp35702_c0_seq1|ZHLZ.comp45488_c0_seq1|ZHLZ.comp49635_c0_seq1|ZHLZ.comp49797_c0_seq1|ZHLZ.comp58329_c1_seq1|	http://www.genome.jp/kegg-bin/show_pathway?ko00625
Naphthalene degradation	KEGG PATHWAY	ko00626	2	90	0.7043	0.9999	ZHLZ.comp45488_c0_seq1|ZHLZ.comp58329_c1_seq1|	http://www.genome.jp/kegg-bin/show_pathway?ko00626
Glyoxylate and dicarboxylate metabolism	KEGG PATHWAY	ko00630	6	156	0.1395	0.58725	ZHLZ.comp46161_c0_seq1|ZHLZ.comp48853_c0_seq1|ZHLZ.comp54402_c0_seq1|ZHLZ.comp57459_c1_seq1|ZHLZ.comp59434_c0_seq1|ZHLZ.comp59437_c0_seq1|	http://www.genome.jp/kegg-bin/show_pathway?ko00630
Propanoate metabolism	KEGG PATHWAY	ko00640	4	149	0.549	0.9999	ZHLZ.comp35464_c0_seq1|ZHLZ.comp45776_c0_seq1|ZHLZ.comp48853_c0_seq1|ZHLZ.comp59918_c0_seq1|	http://www.genome.jp/kegg-bin/show_pathway?ko00640
Butanoate metabolism	KEGG PATHWAY	ko00650	2	135	0.9999	0.9999	ZHLZ.comp53936_c0_seq1|ZHLZ.comp55093_c0_seq1|	http://www.genome.jp/kegg-bin/show_pathway?ko00650
Methane metabolism	KEGG PATHWAY	ko00680	5	249	0.9999	0.9999	ZHLZ.comp26757_c0_seq1|ZHLZ.comp26910_c0_seq1|ZHLZ.comp35381_c0_seq1|ZHLZ.comp45488_c0_seq1|ZHLZ.comp46813_c0_seq1|ZHLZ.comp54402_c0_seq1|	http://www.genome.jp/kegg-bin/show_pathway?ko00680
Carbon fixation in photosynthetic organisms	KEGG PATHWAY	ko00710	11	60	3.642e-08	1.87877e-06	ZHLZ.comp27237_c0_seq1|ZHLZ.comp35381_c0_seq1|ZHLZ.comp35974_c0_seq1|ZHLZ.comp36000_c0_seq1|ZHLZ.comp45546_c0_seq1|ZHLZ.comp46161_c0_seq1|ZHLZ.comp48016_c0_seq1|ZHLZ.comp53861_c0_seq1|ZHLZ.comp53861_c1_seq1|ZHLZ.comp56799_c0_seq1|ZHLZ.comp56799_c1_seq3|ZHLZ.comp57459_c1_seq1|ZHLZ.comp58735_c1_seq3|ZHLZ.comp59434_c0_seq1|ZHLZ.comp59736_c0_seq1|	http://www.genome.jp/kegg-bin/show_pathway?ko00710
Carbon fixation pathways in prokaryotes	KEGG PATHWAY	ko00720	3	148	0.9999	0.9999	ZHLZ.comp45776_c0_seq1|ZHLZ.comp54426_c0_seq1|ZHLZ.comp59542_c0_seq1|ZHLZ.comp59918_c0_seq1|	http://www.genome.jp/kegg-bin/show_pathway?ko00720
Thiamine metabolism	KEGG PATHWAY	ko00730	3	65	0.1454	0.592959	ZHLZ.comp56115_c0_seq1|ZHLZ.comp58022_c0_seq5|ZHLZ.comp58777_c6_seq9|ZHLZ.comp59474_c0_seq1|	http://www.genome.jp/kegg-bin/show_pathway?ko00730
Nicotinate and nicotinamide metabolism	KEGG PATHWAY	ko00760	1	145	0.3761	0.951094	ZHLZ.comp55009_c0_seq1|	http://www.genome.jp/kegg-bin/show_pathway?ko00760
Biotin metabolism	KEGG PATHWAY	ko00780	3	52	0.08872	0.421539	ZHLZ.comp27781_c0_seq1|ZHLZ.comp59648_c0_seq1|ZHLZ.comp59692_c0_seq1|	http://www.genome.jp/kegg-bin/show_pathway?ko00780
Retinol metabolism	KEGG PATHWAY	ko00830	2	73	0.6606	0.9999	ZHLZ.comp45488_c0_seq1|ZHLZ.comp58329_c1_seq1|	http://www.genome.jp/kegg-bin/show_pathway?ko00830
Porphyrin and chlorophyll metabolism	KEGG PATHWAY	ko00860	4	263	0.8232	0.9999	ZHLZ.comp35595_c0_seq1|ZHLZ.comp50461_c0_seq1|ZHLZ.comp55502_c0_seq1|ZHLZ.comp57620_c1_seq1|	http://www.genome.jp/kegg-bin/show_pathway?ko00860
Terpenoid backbone biosynthesis	KEGG PATHWAY	ko00900	11	103	9.351e-06	0.000221874	ZHLZ.comp27339_c0_seq1|ZHLZ.comp35837_c0_seq1|ZHLZ.comp37355_c0_seq1|ZHLZ.comp43393_c0_seq1|ZHLZ.comp44095_c0_seq1|ZHLZ.comp44095_c1_seq1|ZHLZ.comp44788_c0_seq1|ZHLZ.comp48084_c0_seq1|ZHLZ.comp53936_c0_seq1|ZHLZ.comp56115_c0_seq1|ZHLZ.comp57620_c1_seq1|ZHLZ.comp58022_c0_seq5|ZHLZ.comp59540_c0_seq1|	http://www.genome.jp/kegg-bin/show_pathway?ko00900
Indole alkaloid biosynthesis	KEGG PATHWAY	ko00901	1	61	0.9999	0.9999	ZHLZ.comp57839_c0_seq7|	http://www.genome.jp/kegg-bin/show_pathway?ko00901
Monoterpenoid biosynthesis	KEGG PATHWAY	ko00902	1	84	0.9999	0.9999	ZHLZ.comp43081_c0_seq1|ZHLZ.comp55105_c1_seq1|ZHLZ.comp58816_c1_seq34|	http://www.genome.jp/kegg-bin/show_pathway?ko00902
Limonene and pinene degradation	KEGG PATHWAY	ko00903	1	77	0.9999	0.9999	ZHLZ.comp35702_c0_seq1|ZHLZ.comp49635_c0_seq1|ZHLZ.comp49797_c0_seq1|	http://www.genome.jp/kegg-bin/show_pathway?ko00903
Diterpenoid biosynthesis	KEGG PATHWAY	ko00904	1	156	0.3813	0.951094	ZHLZ.comp58775_c0_seq39|	http://www.genome.jp/kegg-bin/show_pathway?ko00904
Brassinosteroid biosynthesis	KEGG PATHWAY	ko00905	2	41	0.2016	0.720789	ZHLZ.comp59405_c3_seq1|ZHLZ.comp59969_c0_seq1|	http://www.genome.jp/kegg-bin/show_pathway?ko00905
Carotenoid biosynthesis	KEGG PATHWAY	ko00906	5	162	0.3892	0.951094	ZHLZ.comp48415_c2_seq1|ZHLZ.comp51734_c0_seq1|ZHLZ.comp51919_c0_seq1|ZHLZ.comp53180_c5_seq1|ZHLZ.comp59016_c0_seq1|	http://www.genome.jp/kegg-bin/show_pathway?ko00906
Sesquiterpenoid and triterpenoid biosynthesis	KEGG PATHWAY	ko00909	1	160	0.385	0.951094	ZHLZ.comp27339_c0_seq1|	http://www.genome.jp/kegg-bin/show_pathway?ko00909
Nitrogen metabolism	KEGG PATHWAY	ko00910	2	80	0.6776	0.9999	ZHLZ.comp50706_c0_seq1|ZHLZ.comp58000_c5_seq1|	http://www.genome.jp/kegg-bin/show_pathway?ko00910
Sulfur metabolism	KEGG PATHWAY	ko00920	3	132	0.7511	0.9999	ZHLZ.comp35493_c0_seq1|ZHLZ.comp54886_c0_seq1|ZHLZ.comp59797_c0_seq1|	http://www.genome.jp/kegg-bin/show_pathway?ko00920
Phenylpropanoid biosynthesis	KEGG PATHWAY	ko00940	13	101	1.739e-07	5.67349e-06	ZHLZ.comp27061_c0_seq1|ZHLZ.comp27061_c1_seq1|ZHLZ.comp27255_c0_seq1|ZHLZ.comp27255_c1_seq1|ZHLZ.comp35478_c0_seq1|ZHLZ.comp43564_c0_seq1|ZHLZ.comp43564_c1_seq1|ZHLZ.comp43564_c2_seq1|ZHLZ.comp43564_c3_seq1|ZHLZ.comp43729_c0_seq1|ZHLZ.comp47439_c0_seq1|ZHLZ.comp49009_c0_seq1|ZHLZ.comp49125_c1_seq1|ZHLZ.comp49432_c0_seq1|ZHLZ.comp50377_c0_seq1|ZHLZ.comp52787_c0_seq1|ZHLZ.comp53469_c0_seq1|ZHLZ.com…	http://www.genome.jp/kegg-bin/show_pathway?ko00940
Flavonoid biosynthesis	KEGG PATHWAY	ko00941	5	91	0.03834	0.265671	ZHLZ.comp27061_c0_seq1|ZHLZ.comp27061_c1_seq1|ZHLZ.comp27950_c0_seq1|ZHLZ.comp35478_c0_seq1|ZHLZ.comp50471_c1_seq1|ZHLZ.comp53323_c0_seq1|ZHLZ.comp56208_c1_seq1|ZHLZ.comp56208_c2_seq1|ZHLZ.comp60846_c0_seq1|	http://www.genome.jp/kegg-bin/show_pathway?ko00941
Flavone and flavonol biosynthesis	KEGG PATHWAY	ko00944	1	62	0.9999	0.9999	ZHLZ.comp53323_c0_seq1|ZHLZ.comp56208_c1_seq1|ZHLZ.comp56208_c2_seq1|	http://www.genome.jp/kegg-bin/show_pathway?ko00944
Stilbenoid, diarylheptanoid and gingerol biosynthesis	KEGG PATHWAY	ko00945	2	38	0.1796	0.699636	ZHLZ.comp27061_c0_seq1|ZHLZ.comp27061_c1_seq1|ZHLZ.comp35478_c0_seq1|	http://www.genome.jp/kegg-bin/show_pathway?ko00945
Isoquinoline alkaloid biosynthesis	KEGG PATHWAY	ko00950	4	139	0.3687	0.951094	ZHLZ.comp26963_c0_seq1|ZHLZ.comp35523_c0_seq1|ZHLZ.comp47117_c0_seq1|ZHLZ.comp59736_c0_seq1|	http://www.genome.jp/kegg-bin/show_pathway?ko00950
Tropane, piperidine and pyridine alkaloid biosynthesis	KEGG PATHWAY	ko00960	2	95	0.7182	0.9999	ZHLZ.comp35523_c0_seq1|ZHLZ.comp59736_c0_seq1|	http://www.genome.jp/kegg-bin/show_pathway?ko00960
Betalain biosynthesis	KEGG PATHWAY	ko00965	1	32	0.4802	0.9999	ZHLZ.comp47117_c0_seq1|	http://www.genome.jp/kegg-bin/show_pathway?ko00965
Metabolism of xenobiotics by cytochrome P450	KEGG PATHWAY	ko00980	3	155	0.9999	0.9999	ZHLZ.comp35384_c0_seq1|ZHLZ.comp41023_c0_seq1|ZHLZ.comp45310_c1_seq1|ZHLZ.comp45488_c0_seq1|ZHLZ.comp45740_c0_seq1|ZHLZ.comp45903_c0_seq1|ZHLZ.comp47918_c0_seq1|ZHLZ.comp54113_c0_seq1|ZHLZ.comp55275_c1_seq1|ZHLZ.comp58329_c1_seq1|	http://www.genome.jp/kegg-bin/show_pathway?ko00980
Insect hormone biosynthesis	KEGG PATHWAY	ko00981	1	44	0.5931	0.9999	ZHLZ.comp35702_c0_seq1|ZHLZ.comp49635_c0_seq1|ZHLZ.comp49797_c0_seq1|	http://www.genome.jp/kegg-bin/show_pathway?ko00981
Drug metabolism - cytochrome P450	KEGG PATHWAY	ko00982	3	125	0.7426	0.9999	ZHLZ.comp35384_c0_seq1|ZHLZ.comp41023_c0_seq1|ZHLZ.comp45310_c1_seq1|ZHLZ.comp45488_c0_seq1|ZHLZ.comp45740_c0_seq1|ZHLZ.comp45903_c0_seq1|ZHLZ.comp47918_c0_seq1|ZHLZ.comp54113_c0_seq1|ZHLZ.comp55275_c1_seq1|ZHLZ.comp58329_c1_seq1|	http://www.genome.jp/kegg-bin/show_pathway?ko00982
Biosynthesis of unsaturated fatty acids	KEGG PATHWAY	ko01040	5	82	0.02607	0.212633	ZHLZ.comp26934_c0_seq1|ZHLZ.comp47338_c0_seq1|ZHLZ.comp53444_c0_seq1|ZHLZ.comp53640_c0_seq1|ZHLZ.comp53640_c1_seq1|ZHLZ.comp55945_c1_seq1|ZHLZ.comp55945_c1_seq2|ZHLZ.comp58913_c0_seq1|ZHLZ.comp59684_c0_seq1|	http://www.genome.jp/kegg-bin/show_pathway?ko01040
Biosynthesis of ansamycins	KEGG PATHWAY	ko01051	1	65	0.9999	0.9999	ZHLZ.comp53861_c0_seq1|ZHLZ.comp53861_c1_seq1|ZHLZ.comp56799_c0_seq1|ZHLZ.comp56799_c1_seq3|ZHLZ.comp58735_c1_seq3|	http://www.genome.jp/kegg-bin/show_pathway?ko01051
Metabolic pathways	KEGG PATHWAY	ko01100	154	4666	6.497e-07	1.69572e-05	ZHLZ.comp25006_c0_seq1|ZHLZ.comp26757_c0_seq1|ZHLZ.comp26793_c0_seq1|ZHLZ.comp26906_c0_seq2|ZHLZ.comp26910_c0_seq1|ZHLZ.comp26923_c0_seq1|ZHLZ.comp26928_c0_seq1|ZHLZ.comp26931_c0_seq2|ZHLZ.comp26932_c0_seq1|ZHLZ.comp26963_c0_seq1|ZHLZ.comp26966_c0_seq1|ZHLZ.comp26985_c0_seq2|ZHLZ.comp26992_c1_seq1|ZHLZ.comp27061_c0_seq1|ZHLZ.comp27061_c1_seq1|ZHLZ.comp27098_c0_seq1|ZHLZ.comp27138_c0_seq1|ZHLZ.com…	http://www.genome.jp/kegg-bin/show_pathway?ko01100
Biosynthesis of secondary metabolites	KEGG PATHWAY	ko01110	93	2131	4.256e-10	3.70272e-08	ZHLZ.comp26757_c0_seq1|ZHLZ.comp26910_c0_seq1|ZHLZ.comp26932_c0_seq1|ZHLZ.comp26963_c0_seq1|ZHLZ.comp27061_c0_seq1|ZHLZ.comp27061_c1_seq1|ZHLZ.comp27081_c0_seq1|ZHLZ.comp27189_c0_seq1|ZHLZ.comp27213_c0_seq1|ZHLZ.comp27255_c0_seq1|ZHLZ.comp27255_c1_seq1|ZHLZ.comp27539_c0_seq1|ZHLZ.comp27950_c0_seq1|ZHLZ.comp35381_c0_seq1|ZHLZ.comp35454_c0_seq1|ZHLZ.comp35478_c0_seq1|ZHLZ.comp35523_c0_seq1|ZHLZ.com…	http://www.genome.jp/kegg-bin/show_pathway?ko01110
Microbial metabolism in diverse environments	KEGG PATHWAY	ko01120	38	2069	0.6195	0.9999	ZHLZ.comp26757_c0_seq1|ZHLZ.comp26910_c0_seq1|ZHLZ.comp27189_c0_seq1|ZHLZ.comp27213_c0_seq1|ZHLZ.comp27237_c0_seq1|ZHLZ.comp35381_c0_seq1|ZHLZ.comp35493_c0_seq1|ZHLZ.comp35702_c0_seq1|ZHLZ.comp35974_c0_seq1|ZHLZ.comp36000_c0_seq1|ZHLZ.comp36082_c1_seq1|ZHLZ.comp36082_c2_seq1|ZHLZ.comp45488_c0_seq1|ZHLZ.comp45546_c0_seq1|ZHLZ.comp45776_c0_seq1|ZHLZ.comp46161_c0_seq1|ZHLZ.comp46348_c1_seq1|ZHLZ.com…	http://www.genome.jp/kegg-bin/show_pathway?ko01120
Biosynthesis of antibiotics	KEGG PATHWAY	ko01130	44	1919	0.3972	0.951094	ZHLZ.comp26757_c0_seq1|ZHLZ.comp26910_c0_seq1|ZHLZ.comp27189_c0_seq1|ZHLZ.comp27213_c0_seq1|ZHLZ.comp27339_c0_seq1|ZHLZ.comp27539_c0_seq1|ZHLZ.comp35381_c0_seq1|ZHLZ.comp35454_c0_seq1|ZHLZ.comp35702_c0_seq1|ZHLZ.comp35837_c0_seq1|ZHLZ.comp35974_c0_seq1|ZHLZ.comp36082_c1_seq1|ZHLZ.comp36082_c2_seq1|ZHLZ.comp37355_c0_seq1|ZHLZ.comp43205_c0_seq1|ZHLZ.comp43393_c0_seq1|ZHLZ.comp43882_c0_seq1|ZHLZ.com…	http://www.genome.jp/kegg-bin/show_pathway?ko01130
Carbon metabolism	KEGG PATHWAY	ko01200	30	452	4.319e-08	1.87877e-06	ZHLZ.comp26757_c0_seq1|ZHLZ.comp26910_c0_seq1|ZHLZ.comp27189_c0_seq1|ZHLZ.comp27213_c0_seq1|ZHLZ.comp27237_c0_seq1|ZHLZ.comp35381_c0_seq1|ZHLZ.comp35464_c0_seq1|ZHLZ.comp35974_c0_seq1|ZHLZ.comp36000_c0_seq1|ZHLZ.comp36082_c1_seq1|ZHLZ.comp36082_c2_seq1|ZHLZ.comp45488_c0_seq1|ZHLZ.comp45546_c0_seq1|ZHLZ.comp45776_c0_seq1|ZHLZ.comp46161_c0_seq1|ZHLZ.comp46348_c1_seq1|ZHLZ.comp46813_c0_seq1|ZHLZ.com…	http://www.genome.jp/kegg-bin/show_pathway?ko01200
2-Oxocarboxylic acid metabolism	KEGG PATHWAY	ko01210	3	213	0.8037	0.9999	ZHLZ.comp52412_c0_seq1|ZHLZ.comp56613_c0_seq1|ZHLZ.comp59736_c0_seq1|	http://www.genome.jp/kegg-bin/show_pathway?ko01210
Fatty acid metabolism	KEGG PATHWAY	ko01212	12	177	0.0003228	0.00445005	ZHLZ.comp26923_c0_seq1|ZHLZ.comp26934_c0_seq1|ZHLZ.comp27781_c0_seq1|ZHLZ.comp43654_c0_seq1|ZHLZ.comp45166_c0_seq1|ZHLZ.comp45776_c0_seq1|ZHLZ.comp47338_c0_seq1|ZHLZ.comp53444_c0_seq1|ZHLZ.comp53640_c0_seq1|ZHLZ.comp53640_c1_seq1|ZHLZ.comp55945_c1_seq1|ZHLZ.comp55945_c1_seq2|ZHLZ.comp58913_c0_seq1|ZHLZ.comp59648_c0_seq1|ZHLZ.comp59684_c0_seq1|ZHLZ.comp59692_c0_seq1|ZHLZ.comp59918_c0_seq1|	http://www.genome.jp/kegg-bin/show_pathway?ko01212
Degradation of aromatic compounds	KEGG PATHWAY	ko01220	3	466	0.02821	0.219086	ZHLZ.comp27061_c0_seq1|ZHLZ.comp27061_c1_seq1|ZHLZ.comp45488_c0_seq1|ZHLZ.comp58329_c1_seq1|	http://www.genome.jp/kegg-bin/show_pathway?ko01220
Biosynthesis of amino acids	KEGG PATHWAY	ko01230	17	352	0.001733	0.0196658	ZHLZ.comp26757_c0_seq1|ZHLZ.comp26910_c0_seq1|ZHLZ.comp27539_c0_seq1|ZHLZ.comp35381_c0_seq1|ZHLZ.comp35974_c0_seq1|ZHLZ.comp36082_c1_seq1|ZHLZ.comp36082_c2_seq1|ZHLZ.comp43882_c0_seq1|ZHLZ.comp45546_c0_seq1|ZHLZ.comp46429_c0_seq1|ZHLZ.comp46813_c0_seq1|ZHLZ.comp48345_c0_seq1|ZHLZ.comp52412_c0_seq1|ZHLZ.comp52668_c0_seq1|ZHLZ.comp53861_c0_seq1|ZHLZ.comp53861_c1_seq1|ZHLZ.comp54886_c0_seq1|ZHLZ.com…	http://www.genome.jp/kegg-bin/show_pathway?ko01230
Vancomycin resistance	KEGG PATHWAY	ko01502	1	46	0.6094	0.9999	ZHLZ.comp52228_c0_seq1|	http://www.genome.jp/kegg-bin/show_pathway?ko01502
Platinum drug resistance	KEGG PATHWAY	ko01524	2	49	0.2614	0.811249	ZHLZ.comp35384_c0_seq1|ZHLZ.comp35493_c0_seq1|ZHLZ.comp41023_c0_seq1|ZHLZ.comp45310_c1_seq1|ZHLZ.comp45740_c0_seq1|ZHLZ.comp45903_c0_seq1|ZHLZ.comp47918_c0_seq1|ZHLZ.comp54113_c0_seq1|ZHLZ.comp55275_c1_seq1|	http://www.genome.jp/kegg-bin/show_pathway?ko01524
ABC transporters	KEGG PATHWAY	ko02010	1	606	0.000136	0.0022185	ZHLZ.comp56603_c3_seq1|ZHLZ.comp58026_c0_seq1|ZHLZ.comp58288_c0_seq1|	http://www.genome.jp/kegg-bin/show_pathway?ko02010
Two-component system	KEGG PATHWAY	ko02020	4	536	0.03868	0.265671	ZHLZ.comp35350_c0_seq1|ZHLZ.comp35493_c0_seq1|ZHLZ.comp49234_c0_seq1|ZHLZ.comp60916_c0_seq1|	http://www.genome.jp/kegg-bin/show_pathway?ko02020
Quorum sensing	KEGG PATHWAY	ko02024	4	338	0.4282	0.989028	ZHLZ.comp43654_c0_seq1|ZHLZ.comp45166_c0_seq1|ZHLZ.comp46062_c0_seq1|ZHLZ.comp47058_c0_seq1|ZHLZ.comp55333_c1_seq1|	http://www.genome.jp/kegg-bin/show_pathway?ko02024
Biofilm formation - Escherichia coli	KEGG PATHWAY	ko02026	1	68	0.9999	0.9999	ZHLZ.comp54763_c0_seq1|	http://www.genome.jp/kegg-bin/show_pathway?ko02026
Ribosome biogenesis in eukaryotes	KEGG PATHWAY	ko03008	1	83	0.9999	0.9999	ZHLZ.comp46030_c0_seq1|	http://www.genome.jp/kegg-bin/show_pathway?ko03008
Ribosome	KEGG PATHWAY	ko03010	12	144	4.634e-05	0.000930365	ZHLZ.comp26951_c0_seq1|ZHLZ.comp26959_c0_seq1|ZHLZ.comp26981_c1_seq1|ZHLZ.comp35522_c0_seq1|ZHLZ.comp36126_c0_seq1|ZHLZ.comp47691_c0_seq2|ZHLZ.comp47691_c0_seq3|ZHLZ.comp48374_c0_seq2|ZHLZ.comp48409_c0_seq1|ZHLZ.comp49661_c0_seq1|ZHLZ.comp54204_c0_seq1|ZHLZ.comp59571_c0_seq1|ZHLZ.comp59572_c0_seq1|ZHLZ.comp59673_c0_seq1|ZHLZ.comp60515_c0_seq1|	http://www.genome.jp/kegg-bin/show_pathway?ko03010
RNA transport	KEGG PATHWAY	ko03013	2	142	0.9999	0.9999	ZHLZ.comp43419_c0_seq1|ZHLZ.comp46030_c0_seq1|	http://www.genome.jp/kegg-bin/show_pathway?ko03013
mRNA surveillance pathway	KEGG PATHWAY	ko03015	1	60	0.9999	0.9999	ZHLZ.comp59946_c0_seq1|	http://www.genome.jp/kegg-bin/show_pathway?ko03015
RNA degradation	KEGG PATHWAY	ko03018	3	79	0.2158	0.733851	ZHLZ.comp26757_c0_seq1|ZHLZ.comp26910_c0_seq1|ZHLZ.comp43590_c0_seq1|ZHLZ.comp43590_c1_seq1|ZHLZ.comp46813_c0_seq1|	http://www.genome.jp/kegg-bin/show_pathway?ko03018
RNA polymerase	KEGG PATHWAY	ko03020	1	52	0.9999	0.9999	ZHLZ.comp26906_c0_seq2|	http://www.genome.jp/kegg-bin/show_pathway?ko03020
Spliceosome	KEGG PATHWAY	ko03040	2	123	0.9999	0.9999	ZHLZ.comp45931_c0_seq1|ZHLZ.comp45931_c1_seq1|ZHLZ.comp45931_c3_seq1|ZHLZ.comp50415_c0_seq1|ZHLZ.comp57139_c0_seq1|	http://www.genome.jp/kegg-bin/show_pathway?ko03040
Protein export	KEGG PATHWAY	ko03060	2	40	0.1942	0.717566	ZHLZ.comp46062_c0_seq1|ZHLZ.comp55333_c1_seq1|	http://www.genome.jp/kegg-bin/show_pathway?ko03060
Bacterial secretion system	KEGG PATHWAY	ko03070	1	76	0.9999	0.9999	ZHLZ.comp55333_c1_seq1|	http://www.genome.jp/kegg-bin/show_pathway?ko03070
PPAR signaling pathway	KEGG PATHWAY	ko03320	3	67	0.1549	0.621983	ZHLZ.comp26959_c1_seq1|ZHLZ.comp43654_c0_seq1|ZHLZ.comp45166_c0_seq1|ZHLZ.comp45313_c1_seq1|ZHLZ.comp56138_c0_seq3|ZHLZ.comp56138_c0_seq4|ZHLZ.comp56138_c0_seq5|ZHLZ.comp58913_c0_seq1|	http://www.genome.jp/kegg-bin/show_pathway?ko03320
MAPK signaling pathway	KEGG PATHWAY	ko04010	1	199	0.1952	0.717566	ZHLZ.comp45931_c0_seq1|ZHLZ.comp45931_c1_seq1|ZHLZ.comp45931_c3_seq1|ZHLZ.comp50415_c0_seq1|	http://www.genome.jp/kegg-bin/show_pathway?ko04010
MAPK signaling pathway - yeast	KEGG PATHWAY	ko04011	3	91	0.4351	0.99615	ZHLZ.comp55452_c0_seq2|ZHLZ.comp59437_c0_seq1|ZHLZ.comp59640_c0_seq1|	http://www.genome.jp/kegg-bin/show_pathway?ko04011
MAPK signaling pathway - fly	KEGG PATHWAY	ko04013	1	85	0.9999	0.9999	ZHLZ.comp26946_c0_seq1|	http://www.genome.jp/kegg-bin/show_pathway?ko04013
Ras signaling pathway	KEGG PATHWAY	ko04014	1	175	0.2717	0.824578	ZHLZ.comp44152_c0_seq1|ZHLZ.comp56130_c0_seq1|ZHLZ.comp57119_c7_seq1|ZHLZ.comp57119_c8_seq1|ZHLZ.comp63264_c0_seq1|	http://www.genome.jp/kegg-bin/show_pathway?ko04014
Rap1 signaling pathway	KEGG PATHWAY	ko04015	2	162	0.7754	0.9999	ZHLZ.comp44152_c0_seq1|ZHLZ.comp45601_c0_seq1|ZHLZ.comp56130_c0_seq1|ZHLZ.comp57119_c7_seq1|ZHLZ.comp57119_c8_seq1|ZHLZ.comp63264_c0_seq1|	http://www.genome.jp/kegg-bin/show_pathway?ko04015
MAPK signaling pathway - plant	KEGG PATHWAY	ko04016	10	55	1.629e-07	5.67349e-06	ZHLZ.comp35076_c0_seq1|ZHLZ.comp35454_c0_seq1|ZHLZ.comp35860_c0_seq1|ZHLZ.comp44152_c0_seq1|ZHLZ.comp48606_c0_seq1|ZHLZ.comp48606_c0_seq2|ZHLZ.comp48984_c0_seq1|ZHLZ.comp49947_c0_seq1|ZHLZ.comp49947_c1_seq1|ZHLZ.comp50012_c0_seq2|ZHLZ.comp53308_c0_seq1|ZHLZ.comp54170_c0_seq1|ZHLZ.comp54447_c0_seq1|ZHLZ.comp54945_c1_seq2|ZHLZ.comp55114_c0_seq1|ZHLZ.comp56130_c0_seq1|ZHLZ.comp57119_c7_seq1|ZHLZ.com…	http://www.genome.jp/kegg-bin/show_pathway?ko04016
Calcium signaling pathway	KEGG PATHWAY	ko04020	5	153	0.2434	0.794092	ZHLZ.comp44152_c0_seq1|ZHLZ.comp46496_c0_seq1|ZHLZ.comp49001_c0_seq2|ZHLZ.comp49001_c1_seq1|ZHLZ.comp56130_c0_seq1|ZHLZ.comp57119_c7_seq1|ZHLZ.comp57119_c8_seq1|ZHLZ.comp58150_c3_seq1|ZHLZ.comp59476_c0_seq1|ZHLZ.comp63264_c0_seq1|	http://www.genome.jp/kegg-bin/show_pathway?ko04020
cGMP-PKG signaling pathway	KEGG PATHWAY	ko04022	3	132	0.7511	0.9999	ZHLZ.comp44152_c0_seq1|ZHLZ.comp56130_c0_seq1|ZHLZ.comp57119_c7_seq1|ZHLZ.comp57119_c8_seq1|ZHLZ.comp58150_c3_seq1|ZHLZ.comp59476_c0_seq1|ZHLZ.comp63264_c0_seq1|	http://www.genome.jp/kegg-bin/show_pathway?ko04022
cAMP signaling pathway	KEGG PATHWAY	ko04024	2	187	0.5946	0.9999	ZHLZ.comp44152_c0_seq1|ZHLZ.comp56130_c0_seq1|ZHLZ.comp57119_c7_seq1|ZHLZ.comp57119_c8_seq1|ZHLZ.comp58913_c0_seq1|ZHLZ.comp63264_c0_seq1|	http://www.genome.jp/kegg-bin/show_pathway?ko04024
HIF-1 signaling pathway	KEGG PATHWAY	ko04066	3	87	0.2588	0.811249	ZHLZ.comp27189_c0_seq1|ZHLZ.comp46348_c1_seq1|ZHLZ.comp46813_c0_seq1|ZHLZ.comp54484_c2_seq1|	http://www.genome.jp/kegg-bin/show_pathway?ko04066
FoxO signaling pathway	KEGG PATHWAY	ko04068	3	107	0.4802	0.9999	ZHLZ.comp26946_c0_seq1|ZHLZ.comp35701_c0_seq1|ZHLZ.comp59437_c0_seq1|	http://www.genome.jp/kegg-bin/show_pathway?ko04068
Phosphatidylinositol signaling system	KEGG PATHWAY	ko04070	3	85	0.2479	0.798789	ZHLZ.comp36137_c0_seq1|ZHLZ.comp44152_c0_seq1|ZHLZ.comp46496_c0_seq1|ZHLZ.comp56130_c0_seq1|ZHLZ.comp57119_c7_seq1|ZHLZ.comp57119_c8_seq1|ZHLZ.comp63264_c0_seq1|	http://www.genome.jp/kegg-bin/show_pathway?ko04070
Sphingolipid signaling pathway	KEGG PATHWAY	ko04071	2	95	0.7182	0.9999	ZHLZ.comp49001_c0_seq2|ZHLZ.comp49001_c1_seq1|ZHLZ.comp59946_c0_seq1|	http://www.genome.jp/kegg-bin/show_pathway?ko04071
Phospholipase D signaling pathway	KEGG PATHWAY	ko04072	2	116	0.9999	0.9999	ZHLZ.comp36137_c0_seq1|ZHLZ.comp49001_c0_seq2|ZHLZ.comp49001_c1_seq1|	http://www.genome.jp/kegg-bin/show_pathway?ko04072
Plant hormone signal transduction	KEGG PATHWAY	ko04075	13	58	1.552e-10	2.02536e-08	ZHLZ.comp122381_c0_seq1|ZHLZ.comp26919_c0_seq1|ZHLZ.comp27096_c0_seq1|ZHLZ.comp27317_c0_seq1|ZHLZ.comp35076_c0_seq1|ZHLZ.comp35860_c0_seq1|ZHLZ.comp37656_c0_seq1|ZHLZ.comp40423_c0_seq1|ZHLZ.comp45303_c0_seq1|ZHLZ.comp48704_c0_seq1|ZHLZ.comp49947_c0_seq1|ZHLZ.comp49947_c1_seq1|ZHLZ.comp50012_c0_seq2|ZHLZ.comp50884_c0_seq1|ZHLZ.comp51125_c0_seq1|ZHLZ.comp52395_c0_seq1|ZHLZ.comp52953_c0_seq1|ZHLZ.co…	http://www.genome.jp/kegg-bin/show_pathway?ko04075
Cell cycle	KEGG PATHWAY	ko04110	2	110	0.9999	0.9999	ZHLZ.comp54928_c0_seq1|ZHLZ.comp59640_c0_seq1|	http://www.genome.jp/kegg-bin/show_pathway?ko04110
Cell cycle - yeast	KEGG PATHWAY	ko04111	1	125	0.5242	0.9999	ZHLZ.comp54928_c0_seq1|	http://www.genome.jp/kegg-bin/show_pathway?ko04111
Cell cycle - Caulobacter	KEGG PATHWAY	ko04112	2	33	0.1438	0.592959	ZHLZ.comp26781_c0_seq1|ZHLZ.comp45526_c0_seq1|ZHLZ.comp52228_c0_seq1|	http://www.genome.jp/kegg-bin/show_pathway?ko04112
Meiosis - yeast	KEGG PATHWAY	ko04113	2	103	0.9999	0.9999	ZHLZ.comp54928_c0_seq1|ZHLZ.comp59946_c0_seq1|	http://www.genome.jp/kegg-bin/show_pathway?ko04113
Oocyte meiosis	KEGG PATHWAY	ko04114	4	83	0.08883	0.421539	ZHLZ.comp44152_c0_seq1|ZHLZ.comp54928_c0_seq1|ZHLZ.comp56130_c0_seq1|ZHLZ.comp57119_c7_seq1|ZHLZ.comp57119_c8_seq1|ZHLZ.comp59640_c0_seq1|ZHLZ.comp59946_c0_seq1|ZHLZ.comp63264_c0_seq1|	http://www.genome.jp/kegg-bin/show_pathway?ko04114
p53 signaling pathway	KEGG PATHWAY	ko04115	1	63	0.9999	0.9999	ZHLZ.comp35493_c0_seq1|	http://www.genome.jp/kegg-bin/show_pathway?ko04115
Ubiquitin mediated proteolysis	KEGG PATHWAY	ko04120	3	126	0.7437	0.9999	ZHLZ.comp43556_c0_seq1|ZHLZ.comp54928_c0_seq1|ZHLZ.comp59066_c0_seq1|	http://www.genome.jp/kegg-bin/show_pathway?ko04120
Autophagy - animal	KEGG PATHWAY	ko04140	1	105	0.7269	0.9999	ZHLZ.comp35701_c0_seq1|	http://www.genome.jp/kegg-bin/show_pathway?ko04140
Protein processing in endoplasmic reticulum	KEGG PATHWAY	ko04141	7	147	0.03146	0.234602	ZHLZ.comp39253_c0_seq1|ZHLZ.comp43886_c0_seq1|ZHLZ.comp45931_c0_seq1|ZHLZ.comp45931_c1_seq1|ZHLZ.comp45931_c3_seq1|ZHLZ.comp46905_c0_seq1|ZHLZ.comp47034_c0_seq1|ZHLZ.comp47898_c1_seq1|ZHLZ.comp48982_c0_seq1|ZHLZ.comp48982_c1_seq1|ZHLZ.comp48982_c2_seq1|ZHLZ.comp50415_c0_seq1|ZHLZ.comp52163_c0_seq1|ZHLZ.comp59514_c0_seq1|	http://www.genome.jp/kegg-bin/show_pathway?ko04141
Lysosome	KEGG PATHWAY	ko04142	2	108	0.9999	0.9999	ZHLZ.comp25006_c0_seq1|ZHLZ.comp48038_c0_seq1|	http://www.genome.jp/kegg-bin/show_pathway?ko04142
Endocytosis	KEGG PATHWAY	ko04144	1	185	0.1912	0.717566	ZHLZ.comp45931_c0_seq1|ZHLZ.comp45931_c1_seq1|ZHLZ.comp45931_c3_seq1|ZHLZ.comp50415_c0_seq1|	http://www.genome.jp/kegg-bin/show_pathway?ko04144
Phagosome	KEGG PATHWAY	ko04145	1	97	0.9999	0.9999	ZHLZ.comp45601_c0_seq1|	http://www.genome.jp/kegg-bin/show_pathway?ko04145
Peroxisome	KEGG PATHWAY	ko04146	7	73	0.0007343	0.00871147	ZHLZ.comp26946_c0_seq1|ZHLZ.comp35508_c0_seq1|ZHLZ.comp35837_c0_seq1|ZHLZ.comp43654_c0_seq1|ZHLZ.comp45166_c0_seq1|ZHLZ.comp57069_c0_seq10|ZHLZ.comp57069_c0_seq4|ZHLZ.comp58913_c0_seq1|ZHLZ.comp59437_c0_seq1|	http://www.genome.jp/kegg-bin/show_pathway?ko04146
mTOR signaling pathway	KEGG PATHWAY	ko04150	1	118	0.7349	0.9999	ZHLZ.comp35701_c0_seq1|	http://www.genome.jp/kegg-bin/show_pathway?ko04150
PI3K-Akt signaling pathway	KEGG PATHWAY	ko04151	3	247	0.4954	0.9999	ZHLZ.comp35701_c0_seq1|ZHLZ.comp59640_c0_seq1|ZHLZ.comp59946_c0_seq1|	http://www.genome.jp/kegg-bin/show_pathway?ko04151
AMPK signaling pathway	KEGG PATHWAY	ko04152	5	108	0.06973	0.371419	ZHLZ.comp26757_c0_seq1|ZHLZ.comp26910_c0_seq1|ZHLZ.comp35701_c0_seq1|ZHLZ.comp43393_c0_seq1|ZHLZ.comp56927_c0_seq1|ZHLZ.comp59946_c0_seq1|	http://www.genome.jp/kegg-bin/show_pathway?ko04152
Apoptosis	KEGG PATHWAY	ko04210	3	114	0.5034	0.9999	ZHLZ.comp35493_c0_seq1|ZHLZ.comp45601_c0_seq1|ZHLZ.comp48038_c0_seq1|	http://www.genome.jp/kegg-bin/show_pathway?ko04210
Longevity regulating pathway	KEGG PATHWAY	ko04211	4	76	0.06912	0.371419	ZHLZ.comp26946_c0_seq1|ZHLZ.comp35701_c0_seq1|ZHLZ.comp56927_c0_seq1|ZHLZ.comp59437_c0_seq1|	http://www.genome.jp/kegg-bin/show_pathway?ko04211
Longevity regulating pathway - worm	KEGG PATHWAY	ko04212	4	68	0.0497	0.30885	ZHLZ.comp26781_c0_seq1|ZHLZ.comp26946_c0_seq1|ZHLZ.comp45526_c0_seq1|ZHLZ.comp57069_c0_seq10|ZHLZ.comp57069_c0_seq4|ZHLZ.comp59437_c0_seq1|	http://www.genome.jp/kegg-bin/show_pathway?ko04212
Longevity regulating pathway - multiple species	KEGG PATHWAY	ko04213	5	61	0.008049	0.0807996	ZHLZ.comp26946_c0_seq1|ZHLZ.comp35508_c0_seq1|ZHLZ.comp35701_c0_seq1|ZHLZ.comp45931_c0_seq1|ZHLZ.comp45931_c1_seq1|ZHLZ.comp45931_c3_seq1|ZHLZ.comp50415_c0_seq1|ZHLZ.comp59437_c0_seq1|	http://www.genome.jp/kegg-bin/show_pathway?ko04213
Apoptosis - fly	KEGG PATHWAY	ko04214	2	58	0.3288	0.922761	ZHLZ.comp27967_c0_seq1|ZHLZ.comp35493_c0_seq1|ZHLZ.comp35564_c0_seq1|	http://www.genome.jp/kegg-bin/show_pathway?ko04214
Apoptosis - multiple species	KEGG PATHWAY	ko04215	1	40	0.5585	0.9999	ZHLZ.comp35493_c0_seq1|	http://www.genome.jp/kegg-bin/show_pathway?ko04215
Ferroptosis	KEGG PATHWAY	ko04216	4	65	0.04331	0.289844	ZHLZ.comp43654_c0_seq1|ZHLZ.comp45166_c0_seq1|ZHLZ.comp46581_c0_seq1|ZHLZ.comp46581_c2_seq1|ZHLZ.comp47429_c2_seq1|ZHLZ.comp58150_c3_seq1|	http://www.genome.jp/kegg-bin/show_pathway?ko04216
Necroptosis	KEGG PATHWAY	ko04217	3	107	0.4802	0.9999	ZHLZ.comp46581_c0_seq1|ZHLZ.comp46581_c2_seq1|ZHLZ.comp58150_c3_seq1|ZHLZ.comp59476_c0_seq1|	http://www.genome.jp/kegg-bin/show_pathway?ko04217
Cellular senescence	KEGG PATHWAY	ko04218	3	122	0.7393	0.9999	ZHLZ.comp44152_c0_seq1|ZHLZ.comp56130_c0_seq1|ZHLZ.comp57119_c7_seq1|ZHLZ.comp57119_c8_seq1|ZHLZ.comp58150_c3_seq1|ZHLZ.comp59476_c0_seq1|ZHLZ.comp63264_c0_seq1|	http://www.genome.jp/kegg-bin/show_pathway?ko04218
Cardiac muscle contraction	KEGG PATHWAY	ko04260	2	65	0.38	0.951094	ZHLZ.comp35350_c0_seq1|ZHLZ.comp49234_c0_seq1|	http://www.genome.jp/kegg-bin/show_pathway?ko04260
Adrenergic signaling in cardiomyocytes	KEGG PATHWAY	ko04261	2	104	0.9999	0.9999	ZHLZ.comp44152_c0_seq1|ZHLZ.comp56130_c0_seq1|ZHLZ.comp57119_c7_seq1|ZHLZ.comp57119_c8_seq1|ZHLZ.comp59946_c0_seq1|ZHLZ.comp63264_c0_seq1|	http://www.genome.jp/kegg-bin/show_pathway?ko04261
Vascular smooth muscle contraction	KEGG PATHWAY	ko04270	1	113	0.731	0.9999	ZHLZ.comp44152_c0_seq1|ZHLZ.comp56130_c0_seq1|ZHLZ.comp57119_c7_seq1|ZHLZ.comp57119_c8_seq1|ZHLZ.comp63264_c0_seq1|	http://www.genome.jp/kegg-bin/show_pathway?ko04270
Wnt signaling pathway	KEGG PATHWAY	ko04310	1	105	0.7269	0.9999	ZHLZ.comp56113_c0_seq1|	http://www.genome.jp/kegg-bin/show_pathway?ko04310
Axon guidance	KEGG PATHWAY	ko04360	1	124	0.524	0.9999	ZHLZ.comp60464_c0_seq1|	http://www.genome.jp/kegg-bin/show_pathway?ko04360
VEGF signaling pathway	KEGG PATHWAY	ko04370	1	46	0.6094	0.9999	ZHLZ.comp49001_c0_seq2|ZHLZ.comp49001_c1_seq1|	http://www.genome.jp/kegg-bin/show_pathway?ko04370
Apelin signaling pathway	KEGG PATHWAY	ko04371	3	112	0.4966	0.9999	ZHLZ.comp35701_c0_seq1|ZHLZ.comp44152_c0_seq1|ZHLZ.comp49001_c0_seq2|ZHLZ.comp49001_c1_seq1|ZHLZ.comp56130_c0_seq1|ZHLZ.comp57119_c7_seq1|ZHLZ.comp57119_c8_seq1|ZHLZ.comp63264_c0_seq1|	http://www.genome.jp/kegg-bin/show_pathway?ko04371
Hippo signaling pathway	KEGG PATHWAY	ko04390	2	112	0.9999	0.9999	ZHLZ.comp45601_c0_seq1|ZHLZ.comp59640_c0_seq1|	http://www.genome.jp/kegg-bin/show_pathway?ko04390
Hippo signaling pathway - fly	KEGG PATHWAY	ko04391	2	53	0.2915	0.8745	ZHLZ.comp45601_c0_seq1|ZHLZ.comp59640_c0_seq1|	http://www.genome.jp/kegg-bin/show_pathway?ko04391
Focal adhesion	KEGG PATHWAY	ko04510	1	151	0.378	0.951094	ZHLZ.comp45601_c0_seq1|	http://www.genome.jp/kegg-bin/show_pathway?ko04510
Adherens junction	KEGG PATHWAY	ko04520	1	61	0.9999	0.9999	ZHLZ.comp45601_c0_seq1|	http://www.genome.jp/kegg-bin/show_pathway?ko04520
Tight junction	KEGG PATHWAY	ko04530	3	103	0.4677	0.9999	ZHLZ.comp35701_c0_seq1|ZHLZ.comp45601_c0_seq1|ZHLZ.comp54309_c0_seq1|	http://www.genome.jp/kegg-bin/show_pathway?ko04530
Platelet activation	KEGG PATHWAY	ko04611	1	104	0.7265	0.9999	ZHLZ.comp45601_c0_seq1|	http://www.genome.jp/kegg-bin/show_pathway?ko04611
Antigen processing and presentation	KEGG PATHWAY	ko04612	2	42	0.209	0.72732	ZHLZ.comp45931_c0_seq1|ZHLZ.comp45931_c1_seq1|ZHLZ.comp45931_c3_seq1|ZHLZ.comp50415_c0_seq1|ZHLZ.comp54309_c0_seq1|	http://www.genome.jp/kegg-bin/show_pathway?ko04612
Renin-angiotensin system	KEGG PATHWAY	ko04614	1	34	0.501	0.9999	ZHLZ.comp43344_c0_seq1|	http://www.genome.jp/kegg-bin/show_pathway?ko04614
NOD-like receptor signaling pathway	KEGG PATHWAY	ko04621	2	152	0.7729	0.9999	ZHLZ.comp51319_c0_seq1|ZHLZ.comp54786_c1_seq1|ZHLZ.comp58150_c3_seq1|	http://www.genome.jp/kegg-bin/show_pathway?ko04621
RIG-I-like receptor signaling pathway	KEGG PATHWAY	ko04622	1	54	0.9999	0.9999	ZHLZ.comp51817_c0_seq1|	http://www.genome.jp/kegg-bin/show_pathway?ko04622
Cytosolic DNA-sensing pathway	KEGG PATHWAY	ko04623	1	53	0.9999	0.9999	ZHLZ.comp26906_c0_seq2|	http://www.genome.jp/kegg-bin/show_pathway?ko04623
Toll and Imd signaling pathway	KEGG PATHWAY	ko04624	1	49	0.9999	0.9999	ZHLZ.comp60915_c0_seq1|	http://www.genome.jp/kegg-bin/show_pathway?ko04624
Plant-pathogen interaction	KEGG PATHWAY	ko04626	9	84	5.732e-05	0.00106861	ZHLZ.comp44152_c0_seq1|ZHLZ.comp47722_c0_seq1|ZHLZ.comp47993_c2_seq1|ZHLZ.comp48984_c0_seq1|ZHLZ.comp54447_c0_seq1|ZHLZ.comp54447_c0_seq4|ZHLZ.comp55114_c0_seq1|ZHLZ.comp56130_c0_seq1|ZHLZ.comp56764_c0_seq1|ZHLZ.comp57119_c7_seq1|ZHLZ.comp57119_c8_seq1|ZHLZ.comp58384_c0_seq1|ZHLZ.comp59921_c0_seq1|ZHLZ.comp63264_c0_seq1|	http://www.genome.jp/kegg-bin/show_pathway?ko04626
IL-17 signaling pathway	KEGG PATHWAY	ko04657	1	82	0.9999	0.9999	ZHLZ.comp57443_c0_seq2|	http://www.genome.jp/kegg-bin/show_pathway?ko04657
Fc gamma R-mediated phagocytosis	KEGG PATHWAY	ko04666	2	67	0.3943	0.951094	ZHLZ.comp49001_c0_seq2|ZHLZ.comp49001_c1_seq1|ZHLZ.comp60464_c0_seq1|	http://www.genome.jp/kegg-bin/show_pathway?ko04666
Leukocyte transendothelial migration	KEGG PATHWAY	ko04670	1	80	0.9999	0.9999	ZHLZ.comp45601_c0_seq1|	http://www.genome.jp/kegg-bin/show_pathway?ko04670
Circadian rhythm	KEGG PATHWAY	ko04710	1	27	0.4242	0.988537	ZHLZ.comp35701_c0_seq1|	http://www.genome.jp/kegg-bin/show_pathway?ko04710
Circadian rhythm - plant	KEGG PATHWAY	ko04712	2	28	0.1099	0.49455	ZHLZ.comp27950_c0_seq1|ZHLZ.comp53088_c0_seq1|ZHLZ.comp60846_c0_seq1|	http://www.genome.jp/kegg-bin/show_pathway?ko04712
Circadian entrainment	KEGG PATHWAY	ko04713	1	90	0.9999	0.9999	ZHLZ.comp44152_c0_seq1|ZHLZ.comp56130_c0_seq1|ZHLZ.comp57119_c7_seq1|ZHLZ.comp57119_c8_seq1|ZHLZ.comp63264_c0_seq1|	http://www.genome.jp/kegg-bin/show_pathway?ko04713
Long-term potentiation	KEGG PATHWAY	ko04720	1	51	0.9999	0.9999	ZHLZ.comp44152_c0_seq1|ZHLZ.comp56130_c0_seq1|ZHLZ.comp57119_c7_seq1|ZHLZ.comp57119_c8_seq1|ZHLZ.comp63264_c0_seq1|	http://www.genome.jp/kegg-bin/show_pathway?ko04720
Synaptic vesicle cycle	KEGG PATHWAY	ko04721	1	53	0.9999	0.9999	ZHLZ.comp61057_c0_seq1|	http://www.genome.jp/kegg-bin/show_pathway?ko04721
Neurotrophin signaling pathway	KEGG PATHWAY	ko04722	2	96	0.7209	0.9999	ZHLZ.comp44152_c0_seq1|ZHLZ.comp56130_c0_seq1|ZHLZ.comp57119_c7_seq1|ZHLZ.comp57119_c8_seq1|ZHLZ.comp59640_c0_seq1|ZHLZ.comp63264_c0_seq1|	http://www.genome.jp/kegg-bin/show_pathway?ko04722
Retrograde endocannabinoid signaling	KEGG PATHWAY	ko04723	2	139	0.9999	0.9999	ZHLZ.comp59675_c0_seq1|ZHLZ.comp61057_c0_seq1|	http://www.genome.jp/kegg-bin/show_pathway?ko04723
Glutamatergic synapse	KEGG PATHWAY	ko04724	1	94	0.9999	0.9999	ZHLZ.comp44422_c0_seq1|	http://www.genome.jp/kegg-bin/show_pathway?ko04724
GABAergic synapse	KEGG PATHWAY	ko04727	2	75	0.6653	0.9999	ZHLZ.comp44422_c0_seq1|ZHLZ.comp61057_c0_seq1|	http://www.genome.jp/kegg-bin/show_pathway?ko04727
Dopaminergic synapse	KEGG PATHWAY	ko04728	2	96	0.7209	0.9999	ZHLZ.comp44152_c0_seq1|ZHLZ.comp56130_c0_seq1|ZHLZ.comp57119_c7_seq1|ZHLZ.comp57119_c8_seq1|ZHLZ.comp59946_c0_seq1|ZHLZ.comp63264_c0_seq1|	http://www.genome.jp/kegg-bin/show_pathway?ko04728
Olfactory transduction	KEGG PATHWAY	ko04740	1	34	0.501	0.9999	ZHLZ.comp44152_c0_seq1|ZHLZ.comp56130_c0_seq1|ZHLZ.comp57119_c7_seq1|ZHLZ.comp57119_c8_seq1|ZHLZ.comp63264_c0_seq1|	http://www.genome.jp/kegg-bin/show_pathway?ko04740
Phototransduction	KEGG PATHWAY	ko04744	1	27	0.4242	0.988537	ZHLZ.comp44152_c0_seq1|ZHLZ.comp56130_c0_seq1|ZHLZ.comp57119_c7_seq1|ZHLZ.comp57119_c8_seq1|ZHLZ.comp63264_c0_seq1|	http://www.genome.jp/kegg-bin/show_pathway?ko04744
Phototransduction - fly	KEGG PATHWAY	ko04745	2	30	0.1232	0.545003	ZHLZ.comp44152_c0_seq1|ZHLZ.comp45601_c0_seq1|ZHLZ.comp56130_c0_seq1|ZHLZ.comp57119_c7_seq1|ZHLZ.comp57119_c8_seq1|ZHLZ.comp63264_c0_seq1|	http://www.genome.jp/kegg-bin/show_pathway?ko04745
Inflammatory mediator regulation of TRP channels	KEGG PATHWAY	ko04750	1	104	0.7265	0.9999	ZHLZ.comp44152_c0_seq1|ZHLZ.comp56130_c0_seq1|ZHLZ.comp57119_c7_seq1|ZHLZ.comp57119_c8_seq1|ZHLZ.comp63264_c0_seq1|	http://www.genome.jp/kegg-bin/show_pathway?ko04750
Regulation of actin cytoskeleton	KEGG PATHWAY	ko04810	2	158	0.7741	0.9999	ZHLZ.comp45601_c0_seq1|ZHLZ.comp60464_c0_seq1|	http://www.genome.jp/kegg-bin/show_pathway?ko04810
Insulin signaling pathway	KEGG PATHWAY	ko04910	2	91	0.7071	0.9999	ZHLZ.comp35701_c0_seq1|ZHLZ.comp44152_c0_seq1|ZHLZ.comp56130_c0_seq1|ZHLZ.comp57119_c7_seq1|ZHLZ.comp57119_c8_seq1|ZHLZ.comp63264_c0_seq1|	http://www.genome.jp/kegg-bin/show_pathway?ko04910
GnRH signaling pathway	KEGG PATHWAY	ko04912	1	70	0.9999	0.9999	ZHLZ.comp44152_c0_seq1|ZHLZ.comp56130_c0_seq1|ZHLZ.comp57119_c7_seq1|ZHLZ.comp57119_c8_seq1|ZHLZ.comp63264_c0_seq1|	http://www.genome.jp/kegg-bin/show_pathway?ko04912
Ovarian steroidogenesis	KEGG PATHWAY	ko04913	1	64	0.9999	0.9999	ZHLZ.comp52706_c0_seq1|	http://www.genome.jp/kegg-bin/show_pathway?ko04913
Estrogen signaling pathway	KEGG PATHWAY	ko04915	2	75	0.6653	0.9999	ZHLZ.comp44152_c0_seq1|ZHLZ.comp45931_c0_seq1|ZHLZ.comp45931_c1_seq1|ZHLZ.comp45931_c3_seq1|ZHLZ.comp50415_c0_seq1|ZHLZ.comp56130_c0_seq1|ZHLZ.comp57119_c7_seq1|ZHLZ.comp57119_c8_seq1|ZHLZ.comp63264_c0_seq1|	http://www.genome.jp/kegg-bin/show_pathway?ko04915
Melanogenesis	KEGG PATHWAY	ko04916	2	74	0.6629	0.9999	ZHLZ.comp44152_c0_seq1|ZHLZ.comp47117_c0_seq1|ZHLZ.comp56130_c0_seq1|ZHLZ.comp57119_c7_seq1|ZHLZ.comp57119_c8_seq1|ZHLZ.comp63264_c0_seq1|	http://www.genome.jp/kegg-bin/show_pathway?ko04916
Prolactin signaling pathway	KEGG PATHWAY	ko04917	1	69	0.9999	0.9999	ZHLZ.comp52706_c0_seq1|	http://www.genome.jp/kegg-bin/show_pathway?ko04917
Thyroid hormone signaling pathway	KEGG PATHWAY	ko04919	2	99	0.9999	0.9999	ZHLZ.comp45601_c0_seq1|ZHLZ.comp46496_c0_seq1|	http://www.genome.jp/kegg-bin/show_pathway?ko04919
Adipocytokine signaling pathway	KEGG PATHWAY	ko04920	3	61	0.1268	0.55158	ZHLZ.comp35701_c0_seq1|ZHLZ.comp43654_c0_seq1|ZHLZ.comp45166_c0_seq1|ZHLZ.comp56927_c0_seq1|	http://www.genome.jp/kegg-bin/show_pathway?ko04920
Oxytocin signaling pathway	KEGG PATHWAY	ko04921	4	125	0.3251	0.922761	ZHLZ.comp35701_c0_seq1|ZHLZ.comp44152_c0_seq1|ZHLZ.comp45069_c0_seq1|ZHLZ.comp45601_c0_seq1|ZHLZ.comp56130_c0_seq1|ZHLZ.comp57119_c7_seq1|ZHLZ.comp57119_c8_seq1|ZHLZ.comp63264_c0_seq1|	http://www.genome.jp/kegg-bin/show_pathway?ko04921
Glucagon signaling pathway	KEGG PATHWAY	ko04922	5	82	0.02607	0.212633	ZHLZ.comp27189_c0_seq1|ZHLZ.comp35701_c0_seq1|ZHLZ.comp36082_c1_seq1|ZHLZ.comp36082_c2_seq1|ZHLZ.comp44152_c0_seq1|ZHLZ.comp46348_c1_seq1|ZHLZ.comp52668_c0_seq1|ZHLZ.comp54484_c2_seq1|ZHLZ.comp56130_c0_seq1|ZHLZ.comp57119_c7_seq1|ZHLZ.comp57119_c8_seq1|ZHLZ.comp63264_c0_seq1|	http://www.genome.jp/kegg-bin/show_pathway?ko04922
Regulation of lipolysis in adipocytes	KEGG PATHWAY	ko04923	1	60	0.9999	0.9999	ZHLZ.comp59675_c0_seq1|	http://www.genome.jp/kegg-bin/show_pathway?ko04923
Renin secretion	KEGG PATHWAY	ko04924	1	68	0.9999	0.9999	ZHLZ.comp44152_c0_seq1|ZHLZ.comp56130_c0_seq1|ZHLZ.comp57119_c7_seq1|ZHLZ.comp57119_c8_seq1|ZHLZ.comp63264_c0_seq1|	http://www.genome.jp/kegg-bin/show_pathway?ko04924
Aldosterone synthesis and secretion	KEGG PATHWAY	ko04925	2	83	0.6854	0.9999	ZHLZ.comp44152_c0_seq1|ZHLZ.comp45069_c0_seq1|ZHLZ.comp56130_c0_seq1|ZHLZ.comp57119_c7_seq1|ZHLZ.comp57119_c8_seq1|ZHLZ.comp63264_c0_seq1|	http://www.genome.jp/kegg-bin/show_pathway?ko04925
Type II diabetes mellitus	KEGG PATHWAY	ko04930	1	44	0.5931	0.9999	ZHLZ.comp36082_c1_seq1|ZHLZ.comp36082_c2_seq1|ZHLZ.comp52668_c0_seq1|	http://www.genome.jp/kegg-bin/show_pathway?ko04930
Insulin resistance	KEGG PATHWAY	ko04931	1	94	0.9999	0.9999	ZHLZ.comp35701_c0_seq1|	http://www.genome.jp/kegg-bin/show_pathway?ko04931
Non-alcoholic fatty liver disease	KEGG PATHWAY	ko04932	6	127	0.04585	0.295885	ZHLZ.comp27213_c0_seq1|ZHLZ.comp35350_c0_seq1|ZHLZ.comp35493_c0_seq1|ZHLZ.comp35701_c0_seq1|ZHLZ.comp49234_c0_seq1|ZHLZ.comp56927_c0_seq1|	http://www.genome.jp/kegg-bin/show_pathway?ko04932
AGE-RAGE signaling pathway in diabetic complications	KEGG PATHWAY	ko04933	1	85	0.9999	0.9999	ZHLZ.comp46496_c0_seq1|	http://www.genome.jp/kegg-bin/show_pathway?ko04933
Proximal tubule bicarbonate reclamation	KEGG PATHWAY	ko04964	1	32	0.4802	0.9999	ZHLZ.comp46161_c0_seq1|	http://www.genome.jp/kegg-bin/show_pathway?ko04964
Salivary secretion	KEGG PATHWAY	ko04970	1	81	0.9999	0.9999	ZHLZ.comp44152_c0_seq1|ZHLZ.comp56130_c0_seq1|ZHLZ.comp57119_c7_seq1|ZHLZ.comp57119_c8_seq1|ZHLZ.comp63264_c0_seq1|	http://www.genome.jp/kegg-bin/show_pathway?ko04970
Gastric acid secretion	KEGG PATHWAY	ko04971	1	64	0.9999	0.9999	ZHLZ.comp44152_c0_seq1|ZHLZ.comp56130_c0_seq1|ZHLZ.comp57119_c7_seq1|ZHLZ.comp57119_c8_seq1|ZHLZ.comp63264_c0_seq1|	http://www.genome.jp/kegg-bin/show_pathway?ko04971
Protein digestion and absorption	KEGG PATHWAY	ko04974	1	104	0.7265	0.9999	ZHLZ.comp44422_c0_seq1|	http://www.genome.jp/kegg-bin/show_pathway?ko04974
Bile secretion	KEGG PATHWAY	ko04976	2	235	0.3407	0.936028	ZHLZ.comp43393_c0_seq1|ZHLZ.comp56603_c3_seq1|ZHLZ.comp58026_c0_seq1|ZHLZ.comp58288_c0_seq1|	http://www.genome.jp/kegg-bin/show_pathway?ko04976
Mineral absorption	KEGG PATHWAY	ko04978	1	61	0.9999	0.9999	ZHLZ.comp46581_c0_seq1|ZHLZ.comp46581_c2_seq1|	http://www.genome.jp/kegg-bin/show_pathway?ko04978
Alzheimer's disease	KEGG PATHWAY	ko05010	7	151	0.03558	0.257955	ZHLZ.comp27213_c0_seq1|ZHLZ.comp35350_c0_seq1|ZHLZ.comp35493_c0_seq1|ZHLZ.comp44152_c0_seq1|ZHLZ.comp45188_c0_seq1|ZHLZ.comp49234_c0_seq1|ZHLZ.comp54988_c0_seq1|ZHLZ.comp56130_c0_seq1|ZHLZ.comp57119_c7_seq1|ZHLZ.comp57119_c8_seq1|ZHLZ.comp63264_c0_seq1|	http://www.genome.jp/kegg-bin/show_pathway?ko05010
Parkinson's disease	KEGG PATHWAY	ko05012	8	137	0.007303	0.0762433	ZHLZ.comp27213_c0_seq1|ZHLZ.comp35350_c0_seq1|ZHLZ.comp35493_c0_seq1|ZHLZ.comp45188_c0_seq1|ZHLZ.comp49234_c0_seq1|ZHLZ.comp54988_c0_seq1|ZHLZ.comp58150_c3_seq1|ZHLZ.comp59476_c0_seq1|	http://www.genome.jp/kegg-bin/show_pathway?ko05012
Amyotrophic lateral sclerosis	KEGG PATHWAY	ko05014	3	54	0.09672	0.442876	ZHLZ.comp35493_c0_seq1|ZHLZ.comp35508_c0_seq1|ZHLZ.comp59437_c0_seq1|	http://www.genome.jp/kegg-bin/show_pathway?ko05014
Huntington's disease	KEGG PATHWAY	ko05016	11	153	0.000341	0.00445005	ZHLZ.comp26906_c0_seq2|ZHLZ.comp26946_c0_seq1|ZHLZ.comp27213_c0_seq1|ZHLZ.comp35350_c0_seq1|ZHLZ.comp35493_c0_seq1|ZHLZ.comp35508_c0_seq1|ZHLZ.comp45188_c0_seq1|ZHLZ.comp49234_c0_seq1|ZHLZ.comp54988_c0_seq1|ZHLZ.comp58150_c3_seq1|ZHLZ.comp59476_c0_seq1|	http://www.genome.jp/kegg-bin/show_pathway?ko05016
Prion diseases	KEGG PATHWAY	ko05020	1	34	0.501	0.9999	ZHLZ.comp35508_c0_seq1|	http://www.genome.jp/kegg-bin/show_pathway?ko05020
Amphetamine addiction	KEGG PATHWAY	ko05031	1	56	0.9999	0.9999	ZHLZ.comp44152_c0_seq1|ZHLZ.comp56130_c0_seq1|ZHLZ.comp57119_c7_seq1|ZHLZ.comp57119_c8_seq1|ZHLZ.comp63264_c0_seq1|	http://www.genome.jp/kegg-bin/show_pathway?ko05031
Morphine addiction	KEGG PATHWAY	ko05032	1	77	0.9999	0.9999	ZHLZ.comp61057_c0_seq1|	http://www.genome.jp/kegg-bin/show_pathway?ko05032
Nicotine addiction	KEGG PATHWAY	ko05033	1	35	0.511	0.9999	ZHLZ.comp61057_c0_seq1|	http://www.genome.jp/kegg-bin/show_pathway?ko05033
Alcoholism	KEGG PATHWAY	ko05034	3	95	0.445	0.998492	ZHLZ.comp44152_c0_seq1|ZHLZ.comp52051_c1_seq1|ZHLZ.comp56130_c0_seq1|ZHLZ.comp57119_c7_seq1|ZHLZ.comp57119_c8_seq1|ZHLZ.comp59440_c0_seq1|ZHLZ.comp59503_c0_seq1|ZHLZ.comp63264_c0_seq1|	http://www.genome.jp/kegg-bin/show_pathway?ko05034
Bacterial invasion of epithelial cells	KEGG PATHWAY	ko05100	1	74	0.9999	0.9999	ZHLZ.comp45601_c0_seq1|	http://www.genome.jp/kegg-bin/show_pathway?ko05100
Vibrio cholerae infection	KEGG PATHWAY	ko05110	1	58	0.9999	0.9999	ZHLZ.comp45601_c0_seq1|	http://www.genome.jp/kegg-bin/show_pathway?ko05110
Pathogenic Escherichia coli infection	KEGG PATHWAY	ko05130	1	45	0.6013	0.9999	ZHLZ.comp45601_c0_seq1|	http://www.genome.jp/kegg-bin/show_pathway?ko05130
Shigellosis	KEGG PATHWAY	ko05131	1	66	0.9999	0.9999	ZHLZ.comp45601_c0_seq1|	http://www.genome.jp/kegg-bin/show_pathway?ko05131
Salmonella infection	KEGG PATHWAY	ko05132	1	87	0.9999	0.9999	ZHLZ.comp45601_c0_seq1|	http://www.genome.jp/kegg-bin/show_pathway?ko05132
Pertussis	KEGG PATHWAY	ko05133	2	90	0.7043	0.9999	ZHLZ.comp44152_c0_seq1|ZHLZ.comp56130_c0_seq1|ZHLZ.comp57119_c7_seq1|ZHLZ.comp57119_c8_seq1|ZHLZ.comp60464_c0_seq1|ZHLZ.comp63264_c0_seq1|	http://www.genome.jp/kegg-bin/show_pathway?ko05133
Legionellosis	KEGG PATHWAY	ko05134	4	71	0.05658	0.343427	ZHLZ.comp35493_c0_seq1|ZHLZ.comp43419_c0_seq1|ZHLZ.comp45931_c0_seq1|ZHLZ.comp45931_c1_seq1|ZHLZ.comp45931_c3_seq1|ZHLZ.comp50415_c0_seq1|ZHLZ.comp53886_c0_seq1|	http://www.genome.jp/kegg-bin/show_pathway?ko05134
Toxoplasmosis	KEGG PATHWAY	ko05145	2	98	0.9999	0.9999	ZHLZ.comp35493_c0_seq1|ZHLZ.comp45931_c0_seq1|ZHLZ.comp45931_c1_seq1|ZHLZ.comp45931_c3_seq1|ZHLZ.comp50415_c0_seq1|	http://www.genome.jp/kegg-bin/show_pathway?ko05145
Tuberculosis	KEGG PATHWAY	ko05152	3	141	0.7636	0.9999	ZHLZ.comp35493_c0_seq1|ZHLZ.comp44152_c0_seq1|ZHLZ.comp49001_c0_seq2|ZHLZ.comp49001_c1_seq1|ZHLZ.comp56130_c0_seq1|ZHLZ.comp57119_c7_seq1|ZHLZ.comp57119_c8_seq1|ZHLZ.comp63264_c0_seq1|	http://www.genome.jp/kegg-bin/show_pathway?ko05152
Hepatitis B	KEGG PATHWAY	ko05161	1	113	0.731	0.9999	ZHLZ.comp35493_c0_seq1|	http://www.genome.jp/kegg-bin/show_pathway?ko05161
Measles	KEGG PATHWAY	ko05162	1	114	0.7317	0.9999	ZHLZ.comp45931_c0_seq1|ZHLZ.comp45931_c1_seq1|ZHLZ.comp45931_c3_seq1|ZHLZ.comp50415_c0_seq1|	http://www.genome.jp/kegg-bin/show_pathway?ko05162
Influenza A	KEGG PATHWAY	ko05164	4	128	0.3338	0.926828	ZHLZ.comp35493_c0_seq1|ZHLZ.comp45601_c0_seq1|ZHLZ.comp45931_c0_seq1|ZHLZ.comp45931_c1_seq1|ZHLZ.comp45931_c3_seq1|ZHLZ.comp48084_c0_seq1|ZHLZ.comp50415_c0_seq1|	http://www.genome.jp/kegg-bin/show_pathway?ko05164
Human papillomavirus infection	KEGG PATHWAY	ko05165	3	232	0.6353	0.9999	ZHLZ.comp36082_c1_seq1|ZHLZ.comp36082_c2_seq1|ZHLZ.comp43557_c0_seq1|ZHLZ.comp52668_c0_seq1|ZHLZ.comp56124_c0_seq1|ZHLZ.comp59946_c0_seq1|	http://www.genome.jp/kegg-bin/show_pathway?ko05165
HTLV-I infection	KEGG PATHWAY	ko05166	5	218	0.6314	0.9999	ZHLZ.comp46030_c0_seq1|ZHLZ.comp48084_c0_seq1|ZHLZ.comp54928_c0_seq1|ZHLZ.comp58150_c3_seq1|ZHLZ.comp59476_c0_seq1|	http://www.genome.jp/kegg-bin/show_pathway?ko05166
Kaposi's sarcoma-associated herpesvirus infection	KEGG PATHWAY	ko05167	1	161	0.386	0.951094	ZHLZ.comp35493_c0_seq1|	http://www.genome.jp/kegg-bin/show_pathway?ko05167
Herpes simplex infection	KEGG PATHWAY	ko05168	1	148	0.3767	0.951094	ZHLZ.comp35493_c0_seq1|	http://www.genome.jp/kegg-bin/show_pathway?ko05168
Epstein-Barr virus infection	KEGG PATHWAY	ko05169	4	168	0.5857	0.9999	ZHLZ.comp26906_c0_seq2|ZHLZ.comp45931_c0_seq1|ZHLZ.comp45931_c1_seq1|ZHLZ.comp45931_c3_seq1|ZHLZ.comp46030_c0_seq1|ZHLZ.comp50415_c0_seq1|ZHLZ.comp59640_c0_seq1|	http://www.genome.jp/kegg-bin/show_pathway?ko05169
Pathways in cancer	KEGG PATHWAY	ko05200	1	344	0.01685	0.146595	ZHLZ.comp35493_c0_seq1|	http://www.genome.jp/kegg-bin/show_pathway?ko05200
Transcriptional misregulation in cancer	KEGG PATHWAY	ko05202	1	158	0.383	0.951094	ZHLZ.comp52051_c1_seq1|ZHLZ.comp59440_c0_seq1|	http://www.genome.jp/kegg-bin/show_pathway?ko05202
Viral carcinogenesis	KEGG PATHWAY	ko05203	4	173	0.7816	0.9999	ZHLZ.comp36082_c1_seq1|ZHLZ.comp36082_c2_seq1|ZHLZ.comp52668_c0_seq1|ZHLZ.comp54928_c0_seq1|ZHLZ.comp59503_c0_seq1|ZHLZ.comp59640_c0_seq1|	http://www.genome.jp/kegg-bin/show_pathway?ko05203
Chemical carcinogenesis	KEGG PATHWAY	ko05204	2	136	0.9999	0.9999	ZHLZ.comp35384_c0_seq1|ZHLZ.comp41023_c0_seq1|ZHLZ.comp45310_c1_seq1|ZHLZ.comp45488_c0_seq1|ZHLZ.comp45740_c0_seq1|ZHLZ.comp45903_c0_seq1|ZHLZ.comp47918_c0_seq1|ZHLZ.comp54113_c0_seq1|ZHLZ.comp55275_c1_seq1|	http://www.genome.jp/kegg-bin/show_pathway?ko05204
Proteoglycans in cancer	KEGG PATHWAY	ko05205	2	170	0.7792	0.9999	ZHLZ.comp45601_c0_seq1|ZHLZ.comp48524_c0_seq1|	http://www.genome.jp/kegg-bin/show_pathway?ko05205
MicroRNAs in cancer	KEGG PATHWAY	ko05206	1	233	0.09623	0.442876	ZHLZ.comp56603_c3_seq1|ZHLZ.comp58026_c0_seq1|ZHLZ.comp58288_c0_seq1|	http://www.genome.jp/kegg-bin/show_pathway?ko05206
Colorectal cancer	KEGG PATHWAY	ko05210	1	60	0.9999	0.9999	ZHLZ.comp35493_c0_seq1|	http://www.genome.jp/kegg-bin/show_pathway?ko05210
Glioma	KEGG PATHWAY	ko05214	1	57	0.9999	0.9999	ZHLZ.comp44152_c0_seq1|ZHLZ.comp56130_c0_seq1|ZHLZ.comp57119_c7_seq1|ZHLZ.comp57119_c8_seq1|ZHLZ.comp63264_c0_seq1|	http://www.genome.jp/kegg-bin/show_pathway?ko05214
Small cell lung cancer	KEGG PATHWAY	ko05222	1	78	0.9999	0.9999	ZHLZ.comp35493_c0_seq1|	http://www.genome.jp/kegg-bin/show_pathway?ko05222
Central carbon metabolism in cancer	KEGG PATHWAY	ko05230	5	84	0.02854	0.219086	ZHLZ.comp26757_c0_seq1|ZHLZ.comp26910_c0_seq1|ZHLZ.comp27189_c0_seq1|ZHLZ.comp36082_c1_seq1|ZHLZ.comp36082_c2_seq1|ZHLZ.comp46348_c1_seq1|ZHLZ.comp46945_c0_seq1|ZHLZ.comp52668_c0_seq1|ZHLZ.comp54484_c2_seq1|	http://www.genome.jp/kegg-bin/show_pathway?ko05230
Choline metabolism in cancer	KEGG PATHWAY	ko05231	1	73	0.9999	0.9999	ZHLZ.comp36137_c0_seq1|	http://www.genome.jp/kegg-bin/show_pathway?ko05231
Systemic lupus erythematosus	KEGG PATHWAY	ko05322	2	49	0.2614	0.811249	ZHLZ.comp52051_c1_seq1|ZHLZ.comp59440_c0_seq1|ZHLZ.comp59503_c0_seq1|	http://www.genome.jp/kegg-bin/show_pathway?ko05322
Hypertrophic cardiomyopathy	KEGG PATHWAY	ko05410	2	79	0.6751	0.9999	ZHLZ.comp35701_c0_seq1|ZHLZ.comp45601_c0_seq1|	http://www.genome.jp/kegg-bin/show_pathway?ko05410
Arrhythmogenic right ventricular cardiomyopathy	KEGG PATHWAY	ko05412	1	68	0.9999	0.9999	ZHLZ.comp45601_c0_seq1|	http://www.genome.jp/kegg-bin/show_pathway?ko05412
Dilated cardiomyopathy	KEGG PATHWAY	ko05414	1	87	0.9999	0.9999	ZHLZ.comp45601_c0_seq1|	http://www.genome.jp/kegg-bin/show_pathway?ko05414
Viral myocarditis	KEGG PATHWAY	ko05416	2	38	0.1796	0.699636	ZHLZ.comp35493_c0_seq1|ZHLZ.comp45601_c0_seq1|	http://www.genome.jp/kegg-bin/show_pathway?ko05416
Fluid shear stress and atherosclerosis	KEGG PATHWAY	ko05418	5	107	0.06759	0.371419	ZHLZ.comp35384_c0_seq1|ZHLZ.comp35701_c0_seq1|ZHLZ.comp41023_c0_seq1|ZHLZ.comp44152_c0_seq1|ZHLZ.comp45310_c1_seq1|ZHLZ.comp45601_c0_seq1|ZHLZ.comp45740_c0_seq1|ZHLZ.comp45903_c0_seq1|ZHLZ.comp47918_c0_seq1|ZHLZ.comp51319_c0_seq1|ZHLZ.comp54113_c0_seq1|ZHLZ.comp54786_c1_seq1|ZHLZ.comp55275_c1_seq1|ZHLZ.comp56130_c0_seq1|ZHLZ.comp57119_c7_seq1|ZHLZ.comp57119_c8_seq1|ZHLZ.comp63264_c0_seq1|	http://www.genome.jp/kegg-bin/show_pathway?ko05418

## Sheet: 1-4KEGG
Term	Database	Id	Sample number	Background number	P-Value	Corrected P-Value	Genes	Hyperlink
Glycolysis / Gluconeogenesis	KEGG PATHWAY	ko00010	16	131	3.484e-06	0.000120779	ZHLZ.comp26776_c0_seq1|ZHLZ.comp26910_c0_seq1|ZHLZ.comp27189_c0_seq1|ZHLZ.comp35702_c0_seq1|ZHLZ.comp40126_c0_seq1|ZHLZ.comp40126_c1_seq1|ZHLZ.comp40126_c2_seq1|ZHLZ.comp45488_c0_seq1|ZHLZ.comp45546_c0_seq1|ZHLZ.comp46348_c1_seq1|ZHLZ.comp48310_c1_seq1|ZHLZ.comp48853_c0_seq1|ZHLZ.comp49635_c0_seq1|ZHLZ.comp49797_c0_seq1|ZHLZ.comp50340_c0_seq1|ZHLZ.comp52668_c0_seq1|ZHLZ.comp54484_c2_seq1|ZHLZ.com…	http://www.genome.jp/kegg-bin/show_pathway?ko00010
Citrate cycle	KEGG PATHWAY	ko00020	9	78	0.000683	0.0119045	ZHLZ.comp27091_c0_seq1|ZHLZ.comp27189_c0_seq1|ZHLZ.comp27213_c0_seq1|ZHLZ.comp27407_c0_seq1|ZHLZ.comp46348_c1_seq1|ZHLZ.comp48853_c0_seq1|ZHLZ.comp50733_c1_seq1|ZHLZ.comp54484_c2_seq1|ZHLZ.comp55188_c0_seq1|ZHLZ.comp56613_c0_seq1|ZHLZ.comp59542_c0_seq1|ZHLZ.comp60222_c0_seq1|	http://www.genome.jp/kegg-bin/show_pathway?ko00020
Pentose phosphate pathway	KEGG PATHWAY	ko00030	7	115	0.09244	0.488835	ZHLZ.comp26910_c0_seq1|ZHLZ.comp35725_c0_seq1|ZHLZ.comp46945_c0_seq1|ZHLZ.comp50340_c0_seq1|ZHLZ.comp53861_c0_seq1|ZHLZ.comp53861_c1_seq1|ZHLZ.comp56799_c0_seq1|ZHLZ.comp56799_c1_seq3|ZHLZ.comp58735_c1_seq3|ZHLZ.comp59614_c0_seq1|ZHLZ.comp59942_c0_seq1|ZHLZ.comp60133_c0_seq1|	http://www.genome.jp/kegg-bin/show_pathway?ko00030
Pentose and glucuronate interconversions	KEGG PATHWAY	ko00040	6	126	0.2896	0.912679	ZHLZ.comp27256_c0_seq1|ZHLZ.comp35725_c0_seq1|ZHLZ.comp38685_c0_seq1|ZHLZ.comp44600_c1_seq1|ZHLZ.comp44600_c3_seq1|ZHLZ.comp44896_c0_seq1|ZHLZ.comp47058_c0_seq1|ZHLZ.comp49885_c0_seq1|ZHLZ.comp52054_c0_seq1|ZHLZ.comp52113_c0_seq3|ZHLZ.comp52552_c1_seq1|ZHLZ.comp53344_c0_seq1|ZHLZ.comp54417_c0_seq1|ZHLZ.comp56605_c0_seq1|ZHLZ.comp56605_c0_seq5|ZHLZ.comp56605_c2_seq1|ZHLZ.comp57143_c0_seq1|ZHLZ.com…	http://www.genome.jp/kegg-bin/show_pathway?ko00040
Fructose and mannose metabolism	KEGG PATHWAY	ko00051	7	163	0.3558	0.930679	ZHLZ.comp26910_c0_seq1|ZHLZ.comp35654_c0_seq1|ZHLZ.comp44096_c0_seq1|ZHLZ.comp45546_c0_seq1|ZHLZ.comp48766_c0_seq1|ZHLZ.comp50340_c0_seq1|ZHLZ.comp57872_c0_seq1|ZHLZ.comp59614_c0_seq1|	http://www.genome.jp/kegg-bin/show_pathway?ko00051
Galactose metabolism	KEGG PATHWAY	ko00052	5	124	0.4358	0.967565	ZHLZ.comp26910_c0_seq1|ZHLZ.comp53276_c0_seq1|ZHLZ.comp55762_c0_seq1|ZHLZ.comp55762_c0_seq2|ZHLZ.comp58378_c1_seq16|ZHLZ.comp58510_c0_seq1|ZHLZ.comp60133_c0_seq1|	http://www.genome.jp/kegg-bin/show_pathway?ko00052
Ascorbate and aldarate metabolism	KEGG PATHWAY	ko00053	6	94	0.07064	0.433313	ZHLZ.comp35702_c0_seq1|ZHLZ.comp45544_c0_seq1|ZHLZ.comp46536_c0_seq1|ZHLZ.comp49114_c0_seq1|ZHLZ.comp49213_c0_seq1|ZHLZ.comp49635_c0_seq1|ZHLZ.comp49797_c0_seq1|ZHLZ.comp52113_c0_seq3|ZHLZ.comp59450_c1_seq1|	http://www.genome.jp/kegg-bin/show_pathway?ko00053
Fatty acid biosynthesis	KEGG PATHWAY	ko00061	8	84	0.004474	0.0512541	ZHLZ.comp27781_c0_seq1|ZHLZ.comp43654_c0_seq1|ZHLZ.comp44087_c0_seq2|ZHLZ.comp45776_c0_seq1|ZHLZ.comp48345_c1_seq1|ZHLZ.comp50138_c0_seq1|ZHLZ.comp53444_c0_seq1|ZHLZ.comp53640_c0_seq1|ZHLZ.comp53640_c1_seq1|ZHLZ.comp54400_c0_seq1|ZHLZ.comp55471_c0_seq1|ZHLZ.comp59648_c0_seq1|ZHLZ.comp59692_c0_seq1|	http://www.genome.jp/kegg-bin/show_pathway?ko00061
Fatty acid elongation	KEGG PATHWAY	ko00062	3	64	0.4494	0.967565	ZHLZ.comp26923_c0_seq1|ZHLZ.comp45514_c0_seq1|ZHLZ.comp48801_c0_seq1|ZHLZ.comp49315_c0_seq1|ZHLZ.comp57955_c0_seq1|ZHLZ.comp58384_c0_seq1|ZHLZ.comp58561_c2_seq2|	http://www.genome.jp/kegg-bin/show_pathway?ko00062
Fatty acid degradation	KEGG PATHWAY	ko00071	8	105	0.01626	0.14092	ZHLZ.comp35702_c0_seq1|ZHLZ.comp43654_c0_seq1|ZHLZ.comp44087_c0_seq2|ZHLZ.comp45488_c0_seq1|ZHLZ.comp48310_c1_seq1|ZHLZ.comp49635_c0_seq1|ZHLZ.comp49797_c0_seq1|ZHLZ.comp50138_c0_seq1|ZHLZ.comp56608_c0_seq2|ZHLZ.comp58329_c1_seq1|ZHLZ.comp58329_c1_seq2|ZHLZ.comp58329_c1_seq3|ZHLZ.comp58406_c1_seq1|ZHLZ.comp58406_c3_seq2|ZHLZ.comp58913_c0_seq1|ZHLZ.comp59631_c0_seq1|	http://www.genome.jp/kegg-bin/show_pathway?ko00071
Synthesis and degradation of ketone bodies	KEGG PATHWAY	ko00072	1	15	0.3739	0.930679	ZHLZ.comp53936_c0_seq1|	http://www.genome.jp/kegg-bin/show_pathway?ko00072
Cutin, suberine and wax biosynthesis	KEGG PATHWAY	ko00073	4	42	0.03978	0.295509	ZHLZ.comp35736_c0_seq1|ZHLZ.comp35912_c0_seq1|ZHLZ.comp48839_c1_seq1|ZHLZ.comp48839_c2_seq1|ZHLZ.comp57069_c0_seq4|ZHLZ.comp58056_c0_seq2|	http://www.genome.jp/kegg-bin/show_pathway?ko00073
Steroid biosynthesis	KEGG PATHWAY	ko00100	4	82	0.3221	0.930679	ZHLZ.comp43205_c0_seq1|ZHLZ.comp51869_c0_seq1|ZHLZ.comp52841_c1_seq1|ZHLZ.comp55773_c0_seq1|	http://www.genome.jp/kegg-bin/show_pathway?ko00100
Ubiquinone and other terpenoid-quinone biosynthesis	KEGG PATHWAY	ko00130	6	147	0.4649	0.967565	ZHLZ.comp27061_c0_seq1|ZHLZ.comp27061_c1_seq1|ZHLZ.comp27255_c0_seq1|ZHLZ.comp27255_c1_seq1|ZHLZ.comp27372_c0_seq1|ZHLZ.comp35390_c0_seq1|ZHLZ.comp35875_c0_seq1|ZHLZ.comp47866_c0_seq1|ZHLZ.comp49194_c0_seq1|ZHLZ.comp50520_c0_seq2|ZHLZ.comp51076_c0_seq1|ZHLZ.comp54051_c0_seq1|	http://www.genome.jp/kegg-bin/show_pathway?ko00130
Oxidative phosphorylation	KEGG PATHWAY	ko00190	12	232	0.08146	0.470658	ZHLZ.comp27213_c0_seq1|ZHLZ.comp35350_c0_seq1|ZHLZ.comp35641_c0_seq1|ZHLZ.comp49234_c0_seq1|ZHLZ.comp50733_c1_seq1|ZHLZ.comp52600_c0_seq1|ZHLZ.comp53103_c0_seq3|ZHLZ.comp54988_c0_seq1|ZHLZ.comp58172_c1_seq3|ZHLZ.comp59549_c0_seq1|ZHLZ.comp59623_c0_seq1|ZHLZ.comp59856_c0_seq1|ZHLZ.comp60035_c0_seq1|	http://www.genome.jp/kegg-bin/show_pathway?ko00190
Photosynthesis	KEGG PATHWAY	ko00195	19	75	1.29e-12	2.0124e-10	ZHLZ.comp26928_c0_seq1|ZHLZ.comp26966_c0_seq1|ZHLZ.comp26992_c1_seq1|ZHLZ.comp27133_c1_seq1|ZHLZ.comp35504_c0_seq1|ZHLZ.comp35609_c0_seq1|ZHLZ.comp46106_c0_seq1|ZHLZ.comp48739_c0_seq1|ZHLZ.comp50068_c0_seq1|ZHLZ.comp50769_c0_seq2|ZHLZ.comp51536_c0_seq1|ZHLZ.comp59454_c0_seq1|ZHLZ.comp59475_c0_seq1|ZHLZ.comp59486_c0_seq1|ZHLZ.comp59672_c0_seq1|ZHLZ.comp59691_c0_seq1|ZHLZ.comp60035_c0_seq1|ZHLZ.com…	http://www.genome.jp/kegg-bin/show_pathway?ko00195
Photosynthesis - antenna proteins	KEGG PATHWAY	ko00196	7	43	0.000324	0.006318	ZHLZ.comp26935_c0_seq1|ZHLZ.comp35584_c0_seq1|ZHLZ.comp52437_c0_seq1|ZHLZ.comp52587_c0_seq1|ZHLZ.comp57801_c0_seq1|ZHLZ.comp57801_c1_seq1|ZHLZ.comp59522_c0_seq1|ZHLZ.comp61770_c0_seq1|	http://www.genome.jp/kegg-bin/show_pathway?ko00196
Arginine biosynthesis	KEGG PATHWAY	ko00220	2	79	0.9999	0.9999	ZHLZ.comp49188_c0_seq1|ZHLZ.comp56694_c2_seq4|	http://www.genome.jp/kegg-bin/show_pathway?ko00220
Purine metabolism	KEGG PATHWAY	ko00230	10	368	0.878	0.9999	ZHLZ.comp27248_c0_seq1|ZHLZ.comp34728_c0_seq1|ZHLZ.comp35454_c0_seq1|ZHLZ.comp44648_c0_seq1|ZHLZ.comp47107_c0_seq1|ZHLZ.comp51315_c0_seq1|ZHLZ.comp52668_c0_seq1|ZHLZ.comp55009_c0_seq1|ZHLZ.comp56140_c0_seq1|ZHLZ.comp60133_c0_seq1|	http://www.genome.jp/kegg-bin/show_pathway?ko00230
Caffeine metabolism	KEGG PATHWAY	ko00232	1	37	0.9999	0.9999	ZHLZ.comp44648_c0_seq1|	http://www.genome.jp/kegg-bin/show_pathway?ko00232
Pyrimidine metabolism	KEGG PATHWAY	ko00240	6	242	0.8496	0.9999	ZHLZ.comp27161_c0_seq1|ZHLZ.comp27714_c0_seq1|ZHLZ.comp35454_c0_seq1|ZHLZ.comp46448_c0_seq1|ZHLZ.comp55009_c0_seq1|ZHLZ.comp58468_c6_seq1|ZHLZ.comp58468_c6_seq3|ZHLZ.comp58468_c6_seq5|	http://www.genome.jp/kegg-bin/show_pathway?ko00240
Alanine, aspartate and glutamate metabolism	KEGG PATHWAY	ko00250	5	96	0.2236	0.801876	ZHLZ.comp34728_c0_seq1|ZHLZ.comp35703_c0_seq1|ZHLZ.comp45736_c0_seq1|ZHLZ.comp48489_c0_seq1|ZHLZ.comp56694_c2_seq4|	http://www.genome.jp/kegg-bin/show_pathway?ko00250
Glycine, serine and threonine metabolism	KEGG PATHWAY	ko00260	6	145	0.4611	0.967565	ZHLZ.comp27536_c0_seq1|ZHLZ.comp35523_c0_seq1|ZHLZ.comp45736_c0_seq1|ZHLZ.comp48853_c0_seq1|ZHLZ.comp49702_c0_seq1|ZHLZ.comp52412_c0_seq1|ZHLZ.comp55188_c0_seq1|	http://www.genome.jp/kegg-bin/show_pathway?ko00260
Monobactam biosynthesis	KEGG PATHWAY	ko00261	1	68	0.7252	0.9999	ZHLZ.comp52412_c0_seq1|	http://www.genome.jp/kegg-bin/show_pathway?ko00261
Cysteine and methionine metabolism	KEGG PATHWAY	ko00270	12	162	0.004764	0.0512541	CL2317Contig1|ZHLZ.comp35516_c0_seq1|ZHLZ.comp35516_c1_seq1|ZHLZ.comp35516_c2_seq1|ZHLZ.comp35521_c0_seq1|ZHLZ.comp43366_c1_seq1|ZHLZ.comp45365_c1_seq1|ZHLZ.comp45736_c0_seq1|ZHLZ.comp49194_c0_seq1|ZHLZ.comp49915_c0_seq1|ZHLZ.comp49915_c1_seq1|ZHLZ.comp52412_c0_seq1|ZHLZ.comp54300_c1_seq1|ZHLZ.comp55899_c0_seq3|ZHLZ.comp59690_c0_seq1|ZHLZ.comp59797_c0_seq1|	http://www.genome.jp/kegg-bin/show_pathway?ko00270
Valine, leucine and isoleucine degradation	KEGG PATHWAY	ko00280	7	111	0.0868	0.4836	ZHLZ.comp35464_c0_seq1|ZHLZ.comp35702_c0_seq1|ZHLZ.comp45736_c0_seq1|ZHLZ.comp48853_c0_seq1|ZHLZ.comp49635_c0_seq1|ZHLZ.comp49797_c0_seq1|ZHLZ.comp53936_c0_seq1|ZHLZ.comp55188_c0_seq1|ZHLZ.comp55230_c0_seq1|ZHLZ.comp59631_c0_seq1|	http://www.genome.jp/kegg-bin/show_pathway?ko00280
Lysine biosynthesis	KEGG PATHWAY	ko00300	1	81	0.5221	0.967565	ZHLZ.comp52412_c0_seq1|	http://www.genome.jp/kegg-bin/show_pathway?ko00300
Lysine degradation	KEGG PATHWAY	ko00310	1	129	0.1923	0.740711	ZHLZ.comp35702_c0_seq1|ZHLZ.comp49635_c0_seq1|ZHLZ.comp49797_c0_seq1|	http://www.genome.jp/kegg-bin/show_pathway?ko00310
Arginine and proline metabolism	KEGG PATHWAY	ko00330	3	177	0.3819	0.930679	ZHLZ.comp35702_c0_seq1|ZHLZ.comp45365_c1_seq1|ZHLZ.comp47074_c0_seq1|ZHLZ.comp49635_c0_seq1|ZHLZ.comp49797_c0_seq1|ZHLZ.comp54760_c0_seq1|	http://www.genome.jp/kegg-bin/show_pathway?ko00330
Prodigiosin biosynthesis	KEGG PATHWAY	ko00333	2	39	0.338	0.930679	ZHLZ.comp55471_c0_seq1|ZHLZ.comp59692_c0_seq1|	http://www.genome.jp/kegg-bin/show_pathway?ko00333
Histidine metabolism	KEGG PATHWAY	ko00340	1	94	0.374	0.930679	ZHLZ.comp35702_c0_seq1|ZHLZ.comp49635_c0_seq1|ZHLZ.comp49797_c0_seq1|	http://www.genome.jp/kegg-bin/show_pathway?ko00340
Tyrosine metabolism	KEGG PATHWAY	ko00350	8	149	0.144	0.641829	ZHLZ.comp27372_c0_seq1|ZHLZ.comp35523_c0_seq1|ZHLZ.comp45488_c0_seq1|ZHLZ.comp47117_c0_seq1|ZHLZ.comp47655_c0_seq1|ZHLZ.comp48310_c1_seq1|ZHLZ.comp49194_c0_seq1|ZHLZ.comp52111_c0_seq1|ZHLZ.comp58329_c1_seq1|ZHLZ.comp58329_c1_seq2|ZHLZ.comp58329_c1_seq3|ZHLZ.comp58406_c1_seq1|ZHLZ.comp58406_c3_seq2|	http://www.genome.jp/kegg-bin/show_pathway?ko00350
Phenylalanine metabolism	KEGG PATHWAY	ko00360	8	149	0.144	0.641829	ZHLZ.comp27061_c0_seq1|ZHLZ.comp27061_c1_seq1|ZHLZ.comp27255_c0_seq1|ZHLZ.comp27255_c1_seq1|ZHLZ.comp27372_c0_seq1|ZHLZ.comp35523_c0_seq1|ZHLZ.comp35875_c0_seq1|ZHLZ.comp43564_c0_seq1|ZHLZ.comp43564_c1_seq1|ZHLZ.comp43564_c2_seq1|ZHLZ.comp43564_c3_seq1|ZHLZ.comp46872_c0_seq1|ZHLZ.comp47655_c0_seq1|ZHLZ.comp49194_c0_seq1|ZHLZ.comp51076_c0_seq1|ZHLZ.comp54051_c0_seq1|ZHLZ.comp58732_c7_seq34|ZHLZ.co…	http://www.genome.jp/kegg-bin/show_pathway?ko00360
Chlorocyclohexane and chlorobenzene degradation	KEGG PATHWAY	ko00361	1	123	0.1896	0.740711	ZHLZ.comp35571_c1_seq1|	http://www.genome.jp/kegg-bin/show_pathway?ko00361
Fluorobenzoate degradation	KEGG PATHWAY	ko00364	1	51	0.9999	0.9999	ZHLZ.comp35571_c1_seq1|	http://www.genome.jp/kegg-bin/show_pathway?ko00364
Tryptophan metabolism	KEGG PATHWAY	ko00380	4	150	0.9999	0.9999	ZHLZ.comp27659_c0_seq1|ZHLZ.comp35702_c0_seq1|ZHLZ.comp36142_c1_seq1|ZHLZ.comp46736_c0_seq1|ZHLZ.comp49635_c0_seq1|ZHLZ.comp49797_c0_seq1|	http://www.genome.jp/kegg-bin/show_pathway?ko00380
Phenylalanine, tyrosine and tryptophan biosynthesis	KEGG PATHWAY	ko00400	6	108	0.1506	0.661792	ZHLZ.comp27049_c0_seq1|ZHLZ.comp27539_c0_seq1|ZHLZ.comp36125_c0_seq1|ZHLZ.comp48411_c1_seq1|ZHLZ.comp49194_c0_seq1|ZHLZ.comp57217_c0_seq1|	http://www.genome.jp/kegg-bin/show_pathway?ko00400
Novobiocin biosynthesis	KEGG PATHWAY	ko00401	1	63	0.9999	0.9999	ZHLZ.comp49194_c0_seq1|	http://www.genome.jp/kegg-bin/show_pathway?ko00401
Phenazine biosynthesis	KEGG PATHWAY	ko00405	1	48	0.9999	0.9999	ZHLZ.comp57217_c0_seq1|	http://www.genome.jp/kegg-bin/show_pathway?ko00405
beta-Alanine metabolism	KEGG PATHWAY	ko00410	5	76	0.08535	0.4836	ZHLZ.comp27161_c0_seq1|ZHLZ.comp35464_c0_seq1|ZHLZ.comp35523_c0_seq1|ZHLZ.comp35702_c0_seq1|ZHLZ.comp48489_c0_seq1|ZHLZ.comp49635_c0_seq1|ZHLZ.comp49797_c0_seq1|	http://www.genome.jp/kegg-bin/show_pathway?ko00410
Taurine and hypotaurine metabolism	KEGG PATHWAY	ko00430	2	47	0.656	0.9999	ZHLZ.comp30176_c0_seq1|ZHLZ.comp48489_c0_seq1|	http://www.genome.jp/kegg-bin/show_pathway?ko00430
Selenocompound metabolism	KEGG PATHWAY	ko00450	3	56	0.2474	0.848229	ZHLZ.comp35521_c0_seq1|ZHLZ.comp55117_c0_seq1|ZHLZ.comp55899_c0_seq3|	http://www.genome.jp/kegg-bin/show_pathway?ko00450
Cyanoamino acid metabolism	KEGG PATHWAY	ko00460	4	80	0.3138	0.930679	ZHLZ.comp26845_c0_seq1|ZHLZ.comp30176_c0_seq1|ZHLZ.comp36142_c0_seq1|ZHLZ.comp43729_c0_seq1|ZHLZ.comp54272_c0_seq1|ZHLZ.comp54462_c0_seq1|ZHLZ.comp54462_c1_seq1|ZHLZ.comp54462_c1_seq2|ZHLZ.comp54869_c0_seq1|ZHLZ.comp58678_c0_seq2|ZHLZ.comp58678_c0_seq4|	http://www.genome.jp/kegg-bin/show_pathway?ko00460
Glutathione metabolism	KEGG PATHWAY	ko00480	6	82	0.04117	0.298722	ZHLZ.comp26878_c0_seq1|ZHLZ.comp30176_c0_seq1|ZHLZ.comp35384_c0_seq1|ZHLZ.comp35980_c0_seq1|ZHLZ.comp45103_c0_seq1|ZHLZ.comp45310_c1_seq1|ZHLZ.comp45740_c0_seq1|ZHLZ.comp45903_c0_seq1|ZHLZ.comp46945_c0_seq1|ZHLZ.comp49114_c0_seq1|ZHLZ.comp49125_c2_seq1|ZHLZ.comp49213_c0_seq1|ZHLZ.comp51834_c0_seq1|ZHLZ.comp54113_c0_seq1|ZHLZ.comp55275_c1_seq1|ZHLZ.comp59593_c0_seq1|ZHLZ.comp86401_c0_seq1|	http://www.genome.jp/kegg-bin/show_pathway?ko00480
Starch and sucrose metabolism	KEGG PATHWAY	ko00500	14	147	0.0002099	0.00467777	ZHLZ.comp26845_c0_seq1|ZHLZ.comp34958_c0_seq1|ZHLZ.comp36142_c0_seq1|ZHLZ.comp43729_c0_seq1|ZHLZ.comp47956_c0_seq1|ZHLZ.comp47956_c1_seq1|ZHLZ.comp48766_c0_seq1|ZHLZ.comp50582_c0_seq1|ZHLZ.comp51503_c3_seq1|ZHLZ.comp52460_c0_seq1|ZHLZ.comp52545_c0_seq1|ZHLZ.comp53061_c1_seq1|ZHLZ.comp53234_c1_seq1|ZHLZ.comp53234_c1_seq2|ZHLZ.comp53234_c1_seq3|ZHLZ.comp53276_c0_seq1|ZHLZ.comp53296_c0_seq7|ZHLZ.com…	http://www.genome.jp/kegg-bin/show_pathway?ko00500
N-Glycan biosynthesis	KEGG PATHWAY	ko00510	1	80	0.522	0.967565	ZHLZ.comp58014_c6_seq3|	http://www.genome.jp/kegg-bin/show_pathway?ko00510
Other glycan degradation	KEGG PATHWAY	ko00511	1	20	0.4643	0.967565	ZHLZ.comp51403_c0_seq2|	http://www.genome.jp/kegg-bin/show_pathway?ko00511
Other types of O-glycan biosynthesis	KEGG PATHWAY	ko00514	1	27	0.5693	0.9999	ZHLZ.comp27320_c0_seq1|	http://www.genome.jp/kegg-bin/show_pathway?ko00514
Amino sugar and nucleotide sugar metabolism	KEGG PATHWAY	ko00520	17	260	0.003636	0.0453773	ZHLZ.comp26771_c0_seq1|ZHLZ.comp26793_c0_seq1|ZHLZ.comp26996_c0_seq1|ZHLZ.comp27233_c0_seq1|ZHLZ.comp39519_c0_seq1|ZHLZ.comp44096_c0_seq1|ZHLZ.comp44918_c0_seq2|ZHLZ.comp46536_c0_seq1|ZHLZ.comp48606_c0_seq1|ZHLZ.comp48606_c0_seq2|ZHLZ.comp48766_c0_seq1|ZHLZ.comp48859_c0_seq1|ZHLZ.comp51294_c0_seq1|ZHLZ.comp52113_c0_seq3|ZHLZ.comp52555_c0_seq1|ZHLZ.comp56463_c0_seq1|ZHLZ.comp56716_c0_seq1|ZHLZ.com…	http://www.genome.jp/kegg-bin/show_pathway?ko00520
Streptomycin biosynthesis	KEGG PATHWAY	ko00521	2	43	0.3826	0.930679	ZHLZ.comp54096_c0_seq1|ZHLZ.comp60133_c0_seq1|	http://www.genome.jp/kegg-bin/show_pathway?ko00521
Glycosaminoglycan degradation	KEGG PATHWAY	ko00531	2	43	0.3826	0.930679	ZHLZ.comp48524_c0_seq1|ZHLZ.comp55877_c0_seq1|	http://www.genome.jp/kegg-bin/show_pathway?ko00531
Peptidoglycan biosynthesis	KEGG PATHWAY	ko00550	1	73	0.7287	0.9999	ZHLZ.comp52228_c0_seq1|	http://www.genome.jp/kegg-bin/show_pathway?ko00550
Glycerolipid metabolism	KEGG PATHWAY	ko00561	7	114	0.0909	0.488835	ZHLZ.comp26932_c0_seq1|ZHLZ.comp30332_c0_seq1|ZHLZ.comp35702_c0_seq1|ZHLZ.comp37484_c0_seq1|ZHLZ.comp44389_c0_seq1|ZHLZ.comp49048_c0_seq1|ZHLZ.comp49635_c0_seq1|ZHLZ.comp49797_c0_seq1|ZHLZ.comp51990_c0_seq1|ZHLZ.comp52638_c2_seq6|ZHLZ.comp55790_c0_seq1|ZHLZ.comp64075_c0_seq1|	http://www.genome.jp/kegg-bin/show_pathway?ko00561
Inositol phosphate metabolism	KEGG PATHWAY	ko00562	7	113	0.08945	0.488835	ZHLZ.comp29168_c0_seq1|ZHLZ.comp45546_c0_seq1|ZHLZ.comp49427_c0_seq1|ZHLZ.comp51215_c0_seq1|ZHLZ.comp53141_c0_seq1|ZHLZ.comp53528_c0_seq1|ZHLZ.comp54096_c0_seq1|ZHLZ.comp56499_c3_seq1|	http://www.genome.jp/kegg-bin/show_pathway?ko00562
Glycerophospholipid metabolism	KEGG PATHWAY	ko00564	4	162	0.821	0.9999	ZHLZ.comp26932_c0_seq1|ZHLZ.comp44389_c0_seq1|ZHLZ.comp51990_c0_seq1|ZHLZ.comp53141_c0_seq1|ZHLZ.comp53528_c0_seq1|ZHLZ.comp55790_c0_seq1|ZHLZ.comp59915_c0_seq1|	http://www.genome.jp/kegg-bin/show_pathway?ko00564
Ether lipid metabolism	KEGG PATHWAY	ko00565	1	55	0.9999	0.9999	ZHLZ.comp53141_c0_seq1|ZHLZ.comp53528_c0_seq1|	http://www.genome.jp/kegg-bin/show_pathway?ko00565
Arachidonic acid metabolism	KEGG PATHWAY	ko00590	2	121	0.5917	0.9999	ZHLZ.comp26878_c0_seq1|ZHLZ.comp30176_c0_seq1|	http://www.genome.jp/kegg-bin/show_pathway?ko00590
Linoleic acid metabolism	KEGG PATHWAY	ko00591	2	54	0.6823	0.9999	ZHLZ.comp43895_c0_seq2|ZHLZ.comp47430_c0_seq1|ZHLZ.comp47430_c1_seq1|ZHLZ.comp54069_c0_seq1|ZHLZ.comp56023_c0_seq1|ZHLZ.comp58977_c0_seq1|ZHLZ.comp58977_c1_seq1|	http://www.genome.jp/kegg-bin/show_pathway?ko00591
alpha-Linolenic acid metabolism	KEGG PATHWAY	ko00592	10	66	3.468e-05	0.00083232	ZHLZ.comp35501_c0_seq1|ZHLZ.comp48310_c1_seq1|ZHLZ.comp49790_c0_seq1|ZHLZ.comp53363_c0_seq1|ZHLZ.comp54069_c0_seq1|ZHLZ.comp55008_c0_seq1|ZHLZ.comp55606_c0_seq1|ZHLZ.comp56023_c0_seq1|ZHLZ.comp56608_c0_seq2|ZHLZ.comp58406_c1_seq1|ZHLZ.comp58406_c3_seq2|ZHLZ.comp58913_c0_seq1|ZHLZ.comp59606_c0_seq1|ZHLZ.comp59631_c0_seq1|	http://www.genome.jp/kegg-bin/show_pathway?ko00592
Sphingolipid metabolism	KEGG PATHWAY	ko00600	3	67	0.4627	0.967565	ZHLZ.comp47129_c0_seq1|ZHLZ.comp47129_c2_seq1|ZHLZ.comp52466_c0_seq1|ZHLZ.comp53635_c0_seq1|ZHLZ.comp54434_c1_seq1|	http://www.genome.jp/kegg-bin/show_pathway?ko00600
Pyruvate metabolism	KEGG PATHWAY	ko00620	9	128	0.01814	0.152964	ZHLZ.comp27189_c0_seq1|ZHLZ.comp35702_c0_seq1|ZHLZ.comp37284_c1_seq1|ZHLZ.comp45776_c0_seq1|ZHLZ.comp46348_c1_seq1|ZHLZ.comp48853_c0_seq1|ZHLZ.comp49635_c0_seq1|ZHLZ.comp49797_c0_seq1|ZHLZ.comp50033_c0_seq1|ZHLZ.comp52668_c0_seq1|ZHLZ.comp54484_c2_seq1|ZHLZ.comp55188_c0_seq1|ZHLZ.comp57414_c0_seq4|ZHLZ.comp60222_c0_seq1|	http://www.genome.jp/kegg-bin/show_pathway?ko00620
Toluene degradation	KEGG PATHWAY	ko00623	1	94	0.374	0.930679	ZHLZ.comp35571_c1_seq1|	http://www.genome.jp/kegg-bin/show_pathway?ko00623
Chloroalkane and chloroalkene degradation	KEGG PATHWAY	ko00625	3	73	0.492	0.967565	ZHLZ.comp35702_c0_seq1|ZHLZ.comp45488_c0_seq1|ZHLZ.comp49635_c0_seq1|ZHLZ.comp49797_c0_seq1|ZHLZ.comp58329_c1_seq1|ZHLZ.comp58329_c1_seq2|ZHLZ.comp58329_c1_seq3|	http://www.genome.jp/kegg-bin/show_pathway?ko00625
Naphthalene degradation	KEGG PATHWAY	ko00626	2	90	0.9999	0.9999	ZHLZ.comp45488_c0_seq1|ZHLZ.comp58329_c1_seq1|ZHLZ.comp58329_c1_seq2|ZHLZ.comp58329_c1_seq3|	http://www.genome.jp/kegg-bin/show_pathway?ko00626
Glyoxylate and dicarboxylate metabolism	KEGG PATHWAY	ko00630	6	156	0.4854	0.967565	ZHLZ.comp33239_c0_seq1|ZHLZ.comp35881_c0_seq1|ZHLZ.comp48853_c0_seq1|ZHLZ.comp54402_c0_seq1|ZHLZ.comp55188_c0_seq1|ZHLZ.comp56694_c2_seq4|ZHLZ.comp59434_c0_seq1|	http://www.genome.jp/kegg-bin/show_pathway?ko00630
Propanoate metabolism	KEGG PATHWAY	ko00640	4	149	0.9999	0.9999	ZHLZ.comp27407_c0_seq1|ZHLZ.comp35464_c0_seq1|ZHLZ.comp45776_c0_seq1|ZHLZ.comp48853_c0_seq1|ZHLZ.comp55188_c0_seq1|	http://www.genome.jp/kegg-bin/show_pathway?ko00640
Butanoate metabolism	KEGG PATHWAY	ko00650	2	135	0.4467	0.967565	ZHLZ.comp48489_c0_seq1|ZHLZ.comp53936_c0_seq1|	http://www.genome.jp/kegg-bin/show_pathway?ko00650
Methane metabolism	KEGG PATHWAY	ko00680	6	249	0.7104	0.9999	ZHLZ.comp26910_c0_seq1|ZHLZ.comp37284_c1_seq1|ZHLZ.comp45488_c0_seq1|ZHLZ.comp49702_c0_seq1|ZHLZ.comp50340_c0_seq1|ZHLZ.comp54402_c0_seq1|ZHLZ.comp57414_c0_seq4|ZHLZ.comp59614_c0_seq1|	http://www.genome.jp/kegg-bin/show_pathway?ko00680
Carbon fixation in photosynthetic organisms	KEGG PATHWAY	ko00710	10	60	1.469e-05	0.000416662	ZHLZ.comp26776_c0_seq1|ZHLZ.comp27237_c0_seq1|ZHLZ.comp33239_c0_seq1|ZHLZ.comp35725_c0_seq1|ZHLZ.comp37284_c1_seq1|ZHLZ.comp45546_c0_seq1|ZHLZ.comp48016_c0_seq1|ZHLZ.comp50340_c0_seq1|ZHLZ.comp53861_c0_seq1|ZHLZ.comp53861_c1_seq1|ZHLZ.comp56799_c0_seq1|ZHLZ.comp56799_c1_seq3|ZHLZ.comp57414_c0_seq4|ZHLZ.comp58735_c1_seq3|ZHLZ.comp59434_c0_seq1|ZHLZ.comp59614_c0_seq1|	http://www.genome.jp/kegg-bin/show_pathway?ko00710
Carbon fixation pathways in prokaryotes	KEGG PATHWAY	ko00720	3	148	0.6328	0.9999	ZHLZ.comp37284_c1_seq1|ZHLZ.comp45776_c0_seq1|ZHLZ.comp57414_c0_seq4|ZHLZ.comp59542_c0_seq1|	http://www.genome.jp/kegg-bin/show_pathway?ko00720
Thiamine metabolism	KEGG PATHWAY	ko00730	2	65	0.9999	0.9999	ZHLZ.comp27248_c0_seq1|ZHLZ.comp56115_c0_seq1|	http://www.genome.jp/kegg-bin/show_pathway?ko00730
Riboflavin metabolism	KEGG PATHWAY	ko00740	1	63	0.9999	0.9999	ZHLZ.comp27103_c0_seq1|	http://www.genome.jp/kegg-bin/show_pathway?ko00740
Vitamin B6 metabolism	KEGG PATHWAY	ko00750	2	52	0.6744	0.9999	ZHLZ.comp43706_c0_seq1|ZHLZ.comp49566_c0_seq2|	http://www.genome.jp/kegg-bin/show_pathway?ko00750
Nicotinate and nicotinamide metabolism	KEGG PATHWAY	ko00760	1	145	0.138	0.633176	ZHLZ.comp55009_c0_seq1|	http://www.genome.jp/kegg-bin/show_pathway?ko00760
Pantothenate and CoA biosynthesis	KEGG PATHWAY	ko00770	1	67	0.7249	0.9999	ZHLZ.comp27161_c0_seq1|	http://www.genome.jp/kegg-bin/show_pathway?ko00770
Biotin metabolism	KEGG PATHWAY	ko00780	4	52	0.07586	0.446572	ZHLZ.comp27781_c0_seq1|ZHLZ.comp55471_c0_seq1|ZHLZ.comp59648_c0_seq1|ZHLZ.comp59692_c0_seq1|	http://www.genome.jp/kegg-bin/show_pathway?ko00780
Folate biosynthesis	KEGG PATHWAY	ko00790	1	99	0.376	0.930679	ZHLZ.comp49280_c0_seq1|	http://www.genome.jp/kegg-bin/show_pathway?ko00790
[truncated: 235 more rows]

## Sheet: 2-3KEGG
Term	Database	Id	Sample number	Background number	P-Value	Corrected P-Value	Genes	Hyperlink
[truncated: 249 more rows]

[truncated: 2 more sheets: 2-4KEGG, 3-4KEGG]
